# Supplementary material for: Proteomic Adaptation of Clostridioides difficile to Treatment with the Antimicrobial Peptide Nisin
Source: MDPI journal article supplement (doi:10.3390/cells10020372), 2021-02-11
Supplement: s1 [file s1]

**A** number in cytosolic fraction    **B** number in membrane fraction

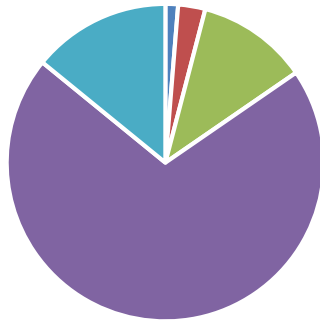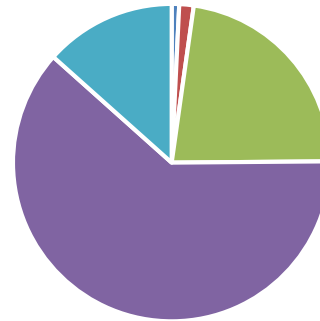

**C** number in predicted proteome    **D** amount in membrane fraction

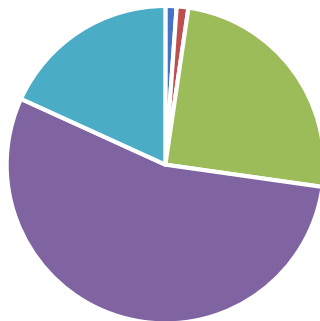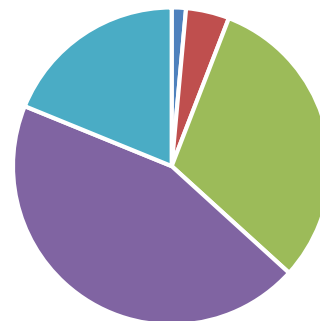

■ extracellular   ■ cell wall   ■ membrane   ■ cytosolic   ■ unknown

Figure S1: Distribution of proteins detected in this study to predicted subcellular localizations. Protein localization was predicted by psortB. The number of proteins assigned to the different subcellular compartments is shown for all proteins identified in either the cytosolic fraction (A) or the membrane enriched fraction (B) and compared to predicted localization of all proteins predicted in the proteome (C). In (D) the amount of proteins predicted for a specific localization was summed up to build the graph.
