# Supplementary material for: Proteomic Adaptation of Clostridioides difficile to Treatment with the Antimicrobial Peptide Nisin
Source: Cells. 2021 Feb 11;10(2):372. doi: 10.3390/cells10020372 (PMC7918085; doi:10.3390/cells10020372)
Supplement: Supplementary file 1 [file cells-10-00372-s001.zip]

Archive with 4 entries (4 files):
- Supplemental Table S2.xlsx
- Supplemental Figure S1.pdf
- Supplemental Table S1.xlsx
- cells-1027148 Figure S2.pdf
