# Supplementary material for: Proteomic Adaptation of Clostridioides difficile to Treatment with the Antimicrobial Peptide Nisin
Source: Cells. 2021 Feb 11;10(2):372. doi: 10.3390/cells10020372 (PMC7918085; doi:10.3390/cells10020372)
Supplement: Supplementary file 1 [file cells-10-00372-s001.zip › Supplemental Table S1.xlsx]

## Sheet: Cytosol
Table S1: Accession numbers, names, and function are provided for the proteins quantified in the cytosolic fraction together with information on the predicted subcellular localization (prediction by pSortB) and functional roles according to TIGR (TIGR Roles as assigned to C. difficle 630). Statisitical significance in the time course experiment (ANOVA, p<0.01) or in t-test (p<0.01) comparing only…
Accession Number	Protein Name	Function	Predicted Localization	TIGR Role	TIGR Subrole	ANOVA significant	t-test 90 min vs Ctrl significant	t-test 180 min vs 90 min significant	On/Off	log2- LFQ intensity Ctrl_A	log2- LFQ intensity Ctrl_B	log2- LFQ intensity Ctrl_C	log2- LFQ intensity 90 min_A	log2- LFQ intensity 90 min_B	log2- LFQ intensity 90 min_C	log2- LFQ intensity 180 min_A	log2- LFQ intensity 180 min_B	log2- LFQ intensity 180 min_C	Unique peptides Ctrl_A	Unique peptides Ctrl_B	Unique peptides Ctrl_C	Unique peptides 90 min_A	Unique peptides 90 min_B	Unique peptides 90 min_C	Unique peptides 180 min_A	Unique peptides 180 min_B	Unique peptides 180 min_C
CDIF630erm_00001	DnaA	chromosomal replication initiator protein	Cytoplasmic	DNA metabolism	DNA replication, recombination, and repair	x				NaN	18.8064	19.6433	NaN	19.629	NaN	NaN	NaN	17.8231	1	3	3	1	4	0	0	1	2
CDIF630erm_00002	DnaN	DNA polymerase III subunit beta	Cytoplasmic	DNA metabolism	DNA replication, recombination, and repair					25.0589	24.8152	26.2142	NaN	25.65	19.4346	21.5274	21.4156	NaN	14	14	15	1	15	2	5	5	1
CDIF630erm_00005	GyrB	DNA gyrase subunit B	Cytoplasmic	DNA metabolism	DNA replication, recombination, and repair	x				23.954	24.4573	24.7647	19.2922	23.6192	NaN	NaN	NaN	20.4161	14	20	19	2	17	1	1	0	3
CDIF630erm_00006	GyrA	DNA gyrase subunit A	Cytoplasmic	DNA metabolism	DNA replication, recombination, and repair	x	x			26.9469	28.2214	28.3079	31.0371	29.3618	29.5357	31.3333	30.2668	30.6687	38	61	48	54	51	48	56	53	51
CDIF630erm_00007	CDIF630erm_00007	putative spore protein	CytoplasmicMembrane	Hypothetical proteins	Domain					NaN	NaN	NaN	25.0276	24.2018	22.4403	23.6327	25.1622	23.4879	0	1	1	6	6	2	3	6	7
CDIF630erm_00008	CDIF630erm_00008	hypothetical protein	CytoplasmicMembrane	Unknown function	Unknown function					NaN	NaN	18.3125	23.1272	23.5978	21.65	NaN	22.7274	22.4853	0	0	2	2	4	2	1	4	4
CDIF630erm_00009	RsbV	anti-sigma factor antagonist	Unknown	Regulatory functions	Protein interactions				x	23.8546	23.1188	23.5364	NaN	21.615	NaN	NaN	NaN	NaN	4	4	4	0	3	0	0	0	0
CDIF630erm_00010	RsbW	serine-protein kinase RsbW	Cytoplasmic	Regulatory functions	Protein interactions					22.6057	21.7606	21.5593	21.2278	21.9255	NaN	NaN	NaN	21.1323	6	6	6	3	6	0	1	1	2
CDIF630erm_00024	SerS1	serine-tRNA ligase	Cytoplasmic	Protein synthesis	tRNA aminoacylation	x				25.2353	24.0383	24.5564	21.801	24.2704	22.1555	22.4377	20.5595	19.2716	12	10	12	3	9	2	3	2	2
CDIF630erm_00031	YbaB	nucleoid-associated protein YbaB	Unknown	Unknown function	Unknown function					25.8545	23.0305	23.3766	22.795	25.0281	22.4226	23.4416	23.498	23.8654	7	6	5	3	6	2	2	3	2
CDIF630erm_00034	UgtP1	processive diacylglycerol beta-glucosyltransferase	Cytoplasmic	Cell envelope	Biosynthesis and degradation of surface polysaccharides and lipopolysaccharides	x				19.989	NaN	21.7383	NaN	NaN	NaN	NaN	21.3392	20.1715	3	2	2	1	1	0	2	3	3
CDIF630erm_00083	PycA	pyruvate carboxylase	Cytoplasmic	Energy metabolism	Glycolysis/gluconeogenesis					25.9056	27.0953	26.8202	23.4271	26.396	23.5355	21.0475	21.3554	24.3996	23	36	34	8	24	13	3	4	8
CDIF630erm_00088	ClpC	class III stress response-related ATPase, AAA+ superfamily	Cytoplasmic	Cellular processes	Adaptations to atypical conditions	x	x			24.634	22.6822	22.4424	21.4932	22.3132	20.9094	20.917	21.4858	22.8626	19	19	16	4	13	3	4	5	6
CDIF630erm_00091	CDIF630erm_00091	putative membrane protein	CytoplasmicMembrane	Hypothetical proteins	Domain		x			23.9425	23.8633	24.1838	25.9828	25.3727	26.0675	25.9208	25.2313	26.5803	10	8	9	13	13	10	9	12	14
CDIF630erm_00110	IspF	2-C-methyl-D-erythritol 2,4-cyclodiphosphate synthase	Cytoplasmic	Biosynthesis of cofactors, prosthetic groups, and carriers	Other			x		21.9758	19.6292	19.3062	NaN	21.2071	19.7592	NaN	18.7992	17.7359	4	2	2	1	3	2	1	2	2
CDIF630erm_00112	ProS1	proline-tRNA ligase	Cytoplasmic	Protein synthesis	tRNA aminoacylation		x	x		27.9576	28.0966	28.2307	23.2289	24.4918	22.9511	22.3966	22.8338	22.7106	24	28	25	5	12	5	3	7	3
CDIF630erm_00113	ProS2	proline-tRNA ligase	Cytoplasmic	Protein synthesis	tRNA aminoacylation		x			29.5404	29.3348	29.4562	26.4771	27.8104	26.0845	26.9637	26.4164	26.5689	31	35	34	12	28	13	15	18	16
CDIF630erm_00114	GltX	glutamate-tRNA ligase	Cytoplasmic	Protein synthesis	tRNA aminoacylation			x		25.005	22.2748	23.2618	23.3291	24.4963	23.9118	23.2539	22.538	23.297	27	13	14	7	15	8	12	7	6
CDIF630erm_00116	CysS	cysteine-tRNA ligase	Cytoplasmic	Protein synthesis	tRNA aminoacylation	x	x			26.0852	25.0667	24.408	23.0124	24.2024	23.1924	24.5822	22.3156	22.3304	22	21	15	6	14	6	11	4	4
CDIF630erm_00118	ThyX	thymidylate synthase (FAD)	Cytoplasmic	Purines, pyrimidines, nucleosides, and nucleotides	2'-Deoxyribonucleotide metabolism		x			23.1578	22.8172	22.8687	22.6284	22.6382	22.1989	22.3361	21.694	21.1326	5	7	6	5	8	3	5	5	2
CDIF630erm_00123	RpmG	50S ribosomal protein L33	Unknown	Protein synthesis	Ribosomal proteins: synthesis and modification					22.8967	23.9434	22.82	NaN	22.9548	NaN	NaN	NaN	NaN	2	2	1	0	1	0	0	1	0
CDIF630erm_00125	NusG	transcription antitermination protein	Cytoplasmic	Transcription	Transcription factors	x				22.8052	25.4052	24.8959	25.5566	24.646	24.9421	25.9864	25.3294	25.7814	10	12	12	5	11	4	6	7	10
CDIF630erm_00126	RplK	50S ribosomal protein L11	Cytoplasmic	Protein synthesis	Ribosomal proteins: synthesis and modification	x				28.358	26.7918	26.7623	26.6203	27.402	25.9398	26.7096	26.9512	27.0346	7	8	7	5	7	4	4	6	7
CDIF630erm_00127	RplA	50S ribosomal protein L1	Cytoplasmic	Protein synthesis	Ribosomal proteins: synthesis and modification	x				28.8985	27.3777	26.9519	26.0493	27.4075	26.7193	26.5789	27.5476	27.0933	16	15	14	10	15	13	12	15	15
CDIF630erm_00129	RplJ	50S ribosomal protein L10	Cytoplasmic	Protein synthesis	Ribosomal proteins: synthesis and modification					26.663	26.4038	25.9624	23.1119	26.3525	22.478	23.7062	25.9776	26.2138	13	14	11	3	8	3	3	5	8
CDIF630erm_00130	RplL	50S ribosomal protein L7/L12	Cytoplasmic	Protein synthesis	Ribosomal proteins: synthesis and modification		x	x		27.285	23.7627	23.935	23.7524	22.6734	22.36	23.8107	26.4141	27.3141	13	8	8	3	4	3	3	6	7
CDIF630erm_00131	CDIF630erm_00131	NADP-dependent 7-alpha-hydroxysteroid dehydrogenase	Cytoplasmic	Energy metabolism	Other	x				20.6603	22.5276	22.2827	NaN	21.4411	NaN	NaN	NaN	19.6401	4	6	6	0	4	0	0	0	3
CDIF630erm_00132	RpoB	DNA-directed RNA polymerase subunit beta	Cytoplasmic	Transcription	DNA-dependent RNA polymerase					29.8433	30.6903	30.4189	30.6783	29.8479	30.447	30.4097	30.9061	31.4609	59	70	69	56	54	60	56	57	57
CDIF630erm_00133	RpoC	DNA-directed RNA polymerase subunit beta'	Cytoplasmic	Transcription	DNA-dependent RNA polymerase	x				28.579	29.6813	29.3018	30.506	28.858	30.1841	28.9966	30.1426	30.6335	43	64	62	50	41	51	33	49	50
CDIF630erm_00134	RpsL	30S ribosomal protein S12	Cytoplasmic	Protein synthesis	Ribosomal proteins: synthesis and modification	x				24.5915	26.3941	25.5586	24.6983	25.4902	24.3857	23.8622	24.8817	23.1102	9	13	9	5	12	5	2	8	7
CDIF630erm_00135	RpsG	30S ribosomal protein S7	Cytoplasmic	Protein synthesis	Ribosomal proteins: synthesis and modification	x				28.9245	26.2331	25.8176	26.6521	27.5909	25.3795	24.7281	27.7548	26.7015	14	15	10	7	12	6	4	10	8
CDIF630erm_00136	FusA2	elongation factor G (EF-g)	Cytoplasmic	Protein synthesis	Translation factors					30.9659	30.9694	31.1778	29.7208	31.063	30.6785	29.648	30.3773	29.8264	44	47	46	29	41	36	26	36	34
CDIF630erm_00137	Tuf2	elongation factor EFTu/EF1A	Cytoplasmic	Protein synthesis	Translation factors					31.4982	32.1224	32.092	29.8136	31.3375	29.6419	29.4383	29.801	29.7476	31	31	25	14	24	19	13	17	15
CDIF630erm_00138	RpsJ	30S ribosomal protein S10	Cytoplasmic	Protein synthesis	Ribosomal proteins: synthesis and modification					24.6385	24.3266	25.5759	25.7336	25.4603	24.8661	25.0852	26.533	25.9129	6	6	7	7	8	6	6	7	5
CDIF630erm_00139	RplC	50S ribosomal protein L3	Cytoplasmic	Protein synthesis	Ribosomal proteins: synthesis and modification	x	x			29.5825	29.6156	29.4122	27.5884	28.6765	26.0539	27.1048	27.5535	29.0756	25	24	23	14	23	13	15	19	21
CDIF630erm_00140	RplD	50S ribosomal protein L4	Unknown	Protein synthesis	Ribosomal proteins: synthesis and modification	x				28.1143	28.4599	29.3526	24.3529	28.8738	25.1534	26.5557	26.8726	28.3449	13	12	13	5	13	3	4	7	11
CDIF630erm_00142	RplB	50S ribosomal protein L2	Unknown	Protein synthesis	Ribosomal proteins: synthesis and modification	x				28.4762	27.6808	27.0409	26.8995	27.9063	26.9651	26.0377	27.104	27.3057	14	15	12	8	13	7	9	12	12
CDIF630erm_00143	RpsS	30S ribosomal protein S19	Cytoplasmic	Protein synthesis	Ribosomal proteins: synthesis and modification					23.9457	22.1288	21.6366	NaN	20.4146	NaN	NaN	22.0411	22.9621	7	6	4	0	2	0	0	2	2
CDIF630erm_00144	RplV	50S ribosomal protein L22	Cytoplasmic	Protein synthesis	Ribosomal proteins: synthesis and modification		x			25.7143	26.2478	26.2109	24.6588	25.544	24.1083	24.3701	24.3017	24.0136	8	8	6	2	6	2	2	4	2
CDIF630erm_00145	RpsC	30S ribosomal protein S3	Cytoplasmic	Protein synthesis	Ribosomal proteins: synthesis and modification	x				28.9129	28.4345	27.96	26.6281	28.8193	27.4259	26.5628	27.8504	29.0482	17	16	16	9	17	11	12	13	14
CDIF630erm_00146	RplP	50S ribosomal protein L16	Cytoplasmic	Protein synthesis	Ribosomal proteins: synthesis and modification					25.8298	24.8473	23.9232	26.3073	25.5791	24.4446	24.7876	25.7787	25.835	7	6	7	4	9	2	4	4	6
CDIF630erm_00147	RpmC	50S ribosomal protein L29	Cytoplasmic	Protein synthesis	Ribosomal proteins: synthesis and modification			x		23.5305	21.6895	21.9357	19.9111	22.4455	NaN	NaN	23.2336	22.831	3	2	3	2	3	1	1	3	3
CDIF630erm_00148	RpsQ	30S ribosomal protein S17	Cytoplasmic	Protein synthesis	Ribosomal proteins: synthesis and modification					27.0988	25.9711	26.1815	24.9288	26.145	23.007	23.815	25.6728	24.8373	7	6	5	4	5	3	3	3	4
CDIF630erm_00149	RplN	50S ribosomal protein L14	Cytoplasmic	Protein synthesis	Ribosomal proteins: synthesis and modification	x	x			27.4991	28.2247	28.2496	26.5662	26.3837	26.6026	27.0236	26.7861	25.9351	10	11	11	6	9	5	6	8	7
CDIF630erm_00150	RplX	50S ribosomal protein L24	Cytoplasmic	Protein synthesis	Ribosomal proteins: synthesis and modification					26.4818	26.9132	26.8784	26.712	27.3357	25.7001	26.7827	26.4702	25.9866	9	10	8	5	9	5	4	4	7
CDIF630erm_00151	RplE	50S ribosomal protein L5	Cytoplasmic	Protein synthesis	Ribosomal proteins: synthesis and modification	x	x	x		32.2157	30.4441	31.0369	30.2829	30.2318	29.8221	30.5658	32.2209	31.344	19	13	15	8	14	8	11	12	11
CDIF630erm_00153	RpsH	30S ribosomal protein S8	Cytoplasmic	Protein synthesis	Ribosomal proteins: synthesis and modification	x				27.6145	28.4166	27.6996	25.7165	28.4902	26.1626	26.6484	26.3071	25.1504	13	17	10	8	12	8	5	8	9
CDIF630erm_00154	RplF	50S ribosomal protein L6	Cytoplasmic	Protein synthesis	Ribosomal proteins: synthesis and modification	x	x			26.821	27.4241	26.8171	24.6166	26.486	23.9429	25.2438	24.0914	25.2652	12	12	11	2	9	2	3	3	5
CDIF630erm_00155	RplR	50S ribosomal protein L18	Cytoplasmic	Protein synthesis	Ribosomal proteins: synthesis and modification		x			28.0899	28.0521	28.0086	26.7622	27.4875	26.1527	26.2391	26.478	26.4305	12	12	11	7	11	6	4	7	7
CDIF630erm_00156	RpsE	30S ribosomal protein S5	Cytoplasmic	Protein synthesis	Ribosomal proteins: synthesis and modification					25.7521	24.4442	24.1079	25.959	27.0453	25.1235	26.7572	25.3389	25.4729	11	11	10	6	9	5	8	8	8
CDIF630erm_00157	RpmD	50S ribosomal protein L30	Cytoplasmic	Protein synthesis	Ribosomal proteins: synthesis and modification	x				20.7869	21.5138	19.497	NaN	19.8093	NaN	NaN	21.2179	20.2076	3	2	2	0	2	0	0	2	2
CDIF630erm_00158	RplO	50S ribosomal protein L15	Unknown	Protein synthesis	Ribosomal proteins: synthesis and modification	x				25.4701	26.5912	27.4269	25.1116	25.7457	23.605	24.6311	25.7941	25.2705	6	10	6	4	6	3	4	4	5
CDIF630erm_00159	SecY	preprotein translocase SecY subunit	CytoplasmicMembrane	Protein fate	Protein and peptide secretion and trafficking	x	x			19.411	19.093	18.6727	22.2103	22.7492	21.2025	21.0779	23.1185	23.4833	2	2	2	3	6	2	2	4	4
CDIF630erm_00160	Adk	adenylate kinase	Cytoplasmic	Purines, pyrimidines, nucleosides, and nucleotides	Nucleotide and nucleoside interconversions	x				28.0324	25.8703	25.2094	22.3278	25.3009	22.3598	24.0532	23.8577	24.948	21	16	11	3	13	3	5	5	9
CDIF630erm_00162	CDIF630erm_00162	ribosomal protein L14E/L6E/L27E-like protein	Unknown	Protein synthesis	Ribosomal proteins: synthesis and modification				x	21.3385	18.7219	18.0432	NaN	18.7311	NaN	NaN	NaN	NaN	3	3	2	0	2	0	0	0	0
CDIF630erm_00165	RpsM	30S ribosomal protein S13	Cytoplasmic	Protein synthesis	Ribosomal proteins: synthesis and modification	x				27.6647	26.706	26.5756	26.7025	27.2183	25.3857	25.8673	26.6154	26.2952	14	13	11	8	12	7	7	7	8
CDIF630erm_00166	RpsK	30S ribosomal protein S11	Cytoplasmic	Protein synthesis	Ribosomal proteins: synthesis and modification		x			27.9661	27.798	27.6102	25.8492	27.1704	26.1555	25.3464	25.3236	25.8557	5	6	5	5	5	5	5	5	5
CDIF630erm_00167	RpsD	30S ribosomal protein S4	Cytoplasmic	Protein synthesis	Ribosomal proteins: synthesis and modification	x				28.7649	29.2252	28.9983	29.0817	29.0456	27.6427	26.8991	28.5333	29.5639	17	18	16	13	16	8	6	13	14
CDIF630erm_00168	RpoA	DNA-directed RNA polymerase subunit alpha	Cytoplasmic	Transcription	DNA-dependent RNA polymerase	x				27.4861	26.284	25.6285	28.4105	26.732	27.2703	28.1075	27.8001	28.3886	25	21	19	18	19	18	18	18	18
CDIF630erm_00169	RplQ	50S ribosomal protein L17	Cytoplasmic	Protein synthesis	Ribosomal proteins: synthesis and modification	x	x			26.8884	26.9666	27.0161	27.602	27.5508	27.3351	26.6389	NaN	27.5901	6	6	5	2	6	3	2	1	2
CDIF630erm_00173	TruA1	transfer RNA pseudouridine synthase A	Unknown	Protein synthesis	tRNA and rRNA base modification	x			x	18.0568	20.1462	20.3776	NaN	18.3451	NaN	NaN	NaN	NaN	2	4	3	0	2	0	0	0	0
CDIF630erm_00174	RplM	50S ribosomal protein L13	Unknown	Protein synthesis	Ribosomal proteins: synthesis and modification					25.8902	24.6664	24.3981	23.0501	26.1324	NaN	NaN	25.3752	24.8855	8	9	7	3	9	0	1	5	8
CDIF630erm_00175	RpsI	30S ribosomal protein S9	Cytoplasmic	Protein synthesis	Ribosomal proteins: synthesis and modification	x				28.6222	27.9164	27.8149	27.2582	28.895	27.4555	26.2736	27.3036	27.2934	10	10	10	5	11	5	3	6	8
CDIF630erm_00203	AspC	aspartate aminotransferase	CytoplasmicMembrane	Amino acid biosynthesis	Aspartate family		x			26.0895	25.6937	26.013	19.9522	25.0403	22.2019	NaN	NaN	19.5212	12	14	15	2	11	4	1	2	2
CDIF630erm_00204	NrdD	anaerobic ribonucleoside triphosphate reductase	Cytoplasmic	Purines, pyrimidines, nucleosides, and nucleotides	2'-Deoxyribonucleotide metabolism					22.3939	24.7936	25.619	20.1464	24.8454	19.7512	20.1028	21.189	20.909	14	23	21	3	18	3	3	4	5
CDIF630erm_00225	YbbP	putative diadenylate cyclase-like protein YbbP	CytoplasmicMembrane	Unknown function	Unknown function	x				NaN	NaN	NaN	NaN	NaN	NaN	NaN	21.3472	22.9184	0	0	0	1	0	1	1	2	2
CDIF630erm_00226	CDIF630erm_00226	putative exported protein	Unknown	Unknown function	Unknown function	x			x	NaN	NaN	NaN	20.8143	18.1759	19.7201	18.331	20.6291	21.2853	0	0	0	2	3	2	2	3	3
CDIF630erm_00227	Ptb1	phosphate butyryltransferase	Cytoplasmic	Unknown function	Unknown function					25.6814	25.4935	26.0069	NaN	23.5695	NaN	NaN	NaN	23.8745	7	11	6	0	4	1	0	0	2
CDIF630erm_00228	Buk	butyrate kinase	Cytoplasmic	Energy metabolism	Fermentation	x		x		24.7634	21.2767	21.7078	21.9683	24.5645	22.9079	20.5604	20.2153	21.2589	15	13	14	4	16	7	3	4	3
CDIF630erm_00230	VorC1	3-methyl-2-oxobutanoate dehydrogenase (ferredoxin), gamma subunit (ferredoxin)	Unknown	Unknown function	Unknown function					22.9005	23.4223	24.1174	NaN	22.7412	NaN	NaN	NaN	NaN	5	6	3	0	3	1	0	1	1
CDIF630erm_00231	VorB1	3-methyl-2-oxobutanoate dehydrogenase (ferredoxin), beta subunit	Cytoplasmic	Energy metabolism	Electron transport			x		24.1167	24.9847	24.6893	24.1646	23.9089	NaN	22.5663	19.5395	NaN	9	12	10	2	9	0	3	2	1
CDIF630erm_00232	VorA1	3-methyl-2-oxobutanoate dehydrogenase (ferredoxin), alpha subunit	Unknown	Energy metabolism	Fermentation	x				23.6569	24.2307	23.8302	21.1282	23.9722	22.6462	22.6195	22.6173	22.2017	7	8	6	3	6	3	2	3	3
CDIF630erm_00233	VorA'1	3-methyl-2-oxobutanoate dehydrogenase (ferredoxin), alpha subunit N-terminal region	Cytoplasmic	Energy metabolism	Electron transport					25.6322	27.7405	27.9046	NaN	25.3981	NaN	22.0492	20.497	23.2603	9	9	8	1	5	0	2	2	2
CDIF630erm_00234	GlmM	phosphoglucosamine mutase	Cytoplasmic	Energy metabolism	Electron transport		x			25.0861	25.6456	25.9638	19.0535	24.4041	20.2576	NaN	20.8534	20.6416	14	15	14	2	11	2	1	6	7
CDIF630erm_00236	GlmS	glucosamine-fructose-6-phosphate aminotransferase [isomerizing]	Cytoplasmic	Central intermediary metabolism	Amino sugars		x			28.1236	28.6716	29.0846	26.6306	27.7354	27.0108	27.3106	26.6986	27.1148	32	36	36	13	28	11	11	17	15
CDIF630erm_00239	MurA	UDP-N-acetylglucosamine 1-carboxyvinyltransferase	Cytoplasmic	Cell envelope	Biosynthesis and degradation of murein sacculus and peptidoglycan		x	x		24.8127	25.2859	25.155	21.1562	24.1336	22.3161	20.5124	18.1943	19.4878	11	12	13	3	8	5	3	2	3
CDIF630erm_00243	MreB1	rod shape-determining protein MreB	Cytoplasmic	Cell envelope	Biosynthesis and degradation of murein sacculus and peptidoglycan					NaN	21.8948	21.8434	NaN	19.8848	NaN	NaN	NaN	NaN	0	5	5	0	3	0	0	0	0
CDIF630erm_00244	FabZ	(3R)-hydroxymyristoyl-[acyl-carrier-protein] dehydratase	Cytoplasmic	Fatty acid and phospholipid metabolism	Biosynthesis		x			22.672	21.7201	21.6324	24.2661	24.1707	23.8677	24.3619	22.9604	23.2337	7	7	4	6	8	4	5	4	5
CDIF630erm_00247	MetK	S-adenosylmethionine synthetase	Cytoplasmic	Central intermediary metabolism	Other	x	x	x		25.8658	26.5108	26.9215	22.9682	24.6261	22.9072	NaN	21.4029	20.9991	10	17	14	3	7	4	1	2	3
CDIF630erm_00259	CDIF630erm_00259	putative RNA-binding protein	Cytoplasmic	Protein synthesis	Translation factors					21.8477	22.1832	22.5521	NaN	23.029	NaN	21.6917	22.7	22.11	5	6	5	1	5	0	3	3	4
CDIF630erm_00260	SecA1	protein translocase subunit SecA1	Cytoplasmic	Protein fate	Protein and peptide secretion and trafficking					25.1281	23.1605	23.7974	26.0859	24.8484	25.7331	25.4406	26.4546	27.065	32	26	27	23	26	18	17	25	29
CDIF630erm_00263	CDIF630erm_00263	putative S1 RNA-binding domain-containing protein	Cytoplasmic	Transcription	Other	x				24.069	21.8238	22.0902	21.2885	23.6676	21.9863	21.6296	21.7688	22.1972	21	15	14	5	14	5	6	6	5
CDIF630erm_00264	CDIF630erm_00264	putative metal-dependent hydrolase	Cytoplasmic	Amino acid biosynthesis	Histidine family					20.3349	21.7305	21.4523	NaN	20.6771	NaN	NaN	NaN	NaN	4	5	5	0	3	0	1	0	1
CDIF630erm_00268	TsaE	tRNA threonylcarbamoyladenosine biosynthesis protein TsaE	Cytoplasmic	Unknown function	Enzymes of unknown specificity	x				21.2558	21.7372	22.7372	NaN	23.4901	NaN	NaN	21.5905	NaN	3	7	4	1	2	0	0	2	0
CDIF630erm_00269	TsaB	tRNA threonylcarbamoyladenosine biosynthesis protein TsaB	Unknown	Protein synthesis	tRNA and rRNA base modification				x	18.4909	19.517	19.4483	NaN	18.0803	NaN	NaN	NaN	NaN	2	3	3	0	3	0	0	0	0
CDIF630erm_00291	CDIF630erm_00291	ABC-type transport system, ATP-binding protein	Cytoplasmic	Transport and binding proteins	Amino acids, peptides and amines	x				19.756	21.2018	21.0095	NaN	NaN	NaN	NaN	NaN	NaN	3	5	3	0	2	0	0	0	1
CDIF630erm_00292	Rex	transcriptional regulator, redox-sensing repressor Rex	Cytoplasmic	Regulatory functions	DNA interactions	x	x			25.8522	24.1489	25.1483	28.822	27.2746	26.9292	28.9184	26.1552	28.1892	9	10	8	10	11	4	6	8	10
CDIF630erm_00296	CDIF630erm_00296	putative CO dehydrogenase (NAD), catalytic subunit	Cytoplasmic	Energy metabolism	Anaerobic	x	x			22.0296	22.8723	22.434	19.5187	20.7976	NaN	NaN	NaN	21.8114	4	9	8	3	3	1	1	0	2
CDIF630erm_00298	CDIF630erm_00298	putative CO dehydrogenase (NAD), NADH dehydrogenase subunit	Cytoplasmic	Energy metabolism	Electron transport	x			x	16.6577	16.5317	19.6775	NaN	17.1395	NaN	NaN	NaN	NaN	2	2	4	0	2	0	0	0	0
CDIF630erm_00299	Cfa	cyclopropane-fatty-acyl-phospholipid synthase	Cytoplasmic	Fatty acid and phospholipid metabolis	Biosynthesis					22.7572	21.5316	21.3597	NaN	21.2712	NaN	NaN	NaN	NaN	5	7	9	0	3	1	1	0	0
CDIF630erm_00301	GluD	glutamate dehydrogenase	Cytoplasmic	Central intermediary metabolism	Nitrogen metabolism	x				27.9552	26.9283	26.7407	25.2906	26.9711	25.8025	26.4921	25.7884	24.4522	24	22	24	7	21	9	10	12	12
CDIF630erm_00306	PyrK	dihydroorotate dehydrogenase (NAD+), electron transfer subunit	Cytoplasmic	Energy metabolism	Electron transport	x				20.1966	21.096	20.5286	NaN	20.7666	NaN	NaN	NaN	NaN	2	3	2	0	2	0	1	1	0
CDIF630erm_00307	PyrD	dihydroorotate dehydrogenase (NAD+), catalytic subunit	Cytoplasmic	Purines, pyrimidines, nucleosides, and nucleotides	Pyrimidine ribonucleotide biosynthesis	x				21.4093	21.6849	21.7346	NaN	19.9699	NaN	NaN	NaN	19.6328	5	7	5	0	3	0	0	1	2
CDIF630erm_00308	PyrE	orotate phosphoribosyltransferase	Cytoplasmic	Purines, pyrimidines, nucleosides, and nucleotides	Pyrimidine ribonucleotide biosynthesis		x			22.8537	24.9689	24.6741	19.5843	22.3572	21.0284	22.2513	19.599	22.8292	7	10	11	2	11	2	3	2	5
CDIF630erm_00312	CDIF630erm_00312	putative 8-oxoguanine-DNA-glycosylase	Cytoplasmic	DNA metabolism	Restriction/modification					20.1089	24.1238	22.5597	NaN	19.3988	NaN	NaN	17.3128	17.7212	4	10	6	1	3	0	0	2	2
CDIF630erm_00314	GroS	10 kDa chaperonin	Cytoplasmic	Protein fate	Protein folding and stabilization		x			26.3445	27.7833	26.5242	24.3333	24.1706	22.5007	24.0524	26.2853	26.0869	11	11	6	5	6	4	3	5	6
CDIF630erm_00315	GroL	60 kDa chaperonin	Cytoplasmic	Protein fate	Protein folding and stabilization			x		29.9157	27.4241	27.0518	27.3738	27.9117	28.2302	29.5769	28.7696	28.3711	47	37	35	23	35	29	29	28	23
CDIF630erm_00317	LarC	Ni2+ carrier LarC	Cytoplasmic	n.d.	n.d.					NaN	22.3179	23.4718	NaN	21.6055	NaN	NaN	NaN	NaN	1	2	3	1	2	0	0	1	0
CDIF630erm_00320	GuaA	GMP synthase (glutamine-hydrolysing)	Cytoplasmic	Purines, pyrimidines, nucleosides, and nucleotides	Purine ribonucleotide biosynthesis	x	x	x		27.9858	27.9964	27.9127	26.4962	27.1488	26.0572	25.8443	25.0135	25.7923	28	31	30	12	23	15	12	11	8
CDIF630erm_00333	CDIF630erm_00333	putative nucleotide-diphospho-sugar transferase	Cytoplasmic	Cell envelope	Biosynthesis and degradation of surface polysaccharides and lipopolysaccharides	x				20.6827	22.4822	21.5169	NaN	20.9711	NaN	NaN	NaN	NaN	3	8	3	0	4	0	0	0	2
CDIF630erm_00334	CDIF630erm_00334	putative alkaline-phosphatase	Unknown	Unknown function	Unknown function		x	x		25.8806	26.4238	26.3311	NaN	23.9194	22.4369	20.8179	21.3577	21.6062	20	25	24	1	13	4	2	6	4
CDIF630erm_00341	PurC2	phosphoribosylaminoimidazole-succinocarboxamide synthase	Cytoplasmic	Purines, pyrimidines, nucleosides, and nucleotides	Purine ribonucleotide biosynthesis	x				21.0652	21.9989	20.8122	NaN	20.9403	NaN	NaN	NaN	NaN	4	4	4	0	4	0	0	1	0
CDIF630erm_00342	PurF	amidophosphoribosyltransferase	Cytoplasmic	Purines, pyrimidines, nucleosides, and nucleotides	Purine ribonucleotide biosynthesis					19.7405	22.4485	22.3055	NaN	20.6114	NaN	NaN	NaN	NaN	4	7	7	0	6	0	1	1	1
CDIF630erm_00343	PurG	phosphoribosylformylglycinamidine cyclo-ligase	Cytoplasmic	Purines, pyrimidines, nucleosides, and nucleotides	Purine ribonucleotide biosynthesis					19.2799	21.1964	20.6829	NaN	19.9819	NaN	NaN	NaN	NaN	6	6	6	0	3	0	1	0	0
CDIF630erm_00345	PurH	bifunctional phosphoribosylaminoimidazolecarboxamide formyltransferase/IMP cyclohydrolase	Cytoplasmic	Purines, pyrimidines, nucleosides, and nucleotides	Purine ribonucleotide biosynthesis					22.5189	21.1749	21.7775	NaN	21.9778	20.3332	NaN	NaN	20.0188	9	7	6	0	3	3	1	1	2
CDIF630erm_00346	PurD	phosphoribosylamine-glycine ligase	Cytoplasmic	Purines, pyrimidines, nucleosides, and nucleotides	Purine ribonucleotide biosynthesis					19.7101	20.0238	20.0581	NaN	20.8382	NaN	19.6846	NaN	NaN	5	4	6	0	4	0	3	0	0
CDIF630erm_00347	PurL	phosphoribosylformylglycinamidine synthase	Cytoplasmic	Purines, pyrimidines, nucleosides, and nucleotides	Purine ribonucleotide biosynthesis		x			24.72	25.5021	25.0426	18.2592	22.7959	21.2525	NaN	20.1868	19.4239	18	29	23	3	15	7	1	4	4
CDIF630erm_00350	FliN1	flagellar motor switch protein FliN	Cytoplasmic	Cellular processes	Chemotaxis and motility					21.2592	19.8692	20.4615	NaN	20.2347	NaN	NaN	22.3495	18.8412	3	4	3	0	2	0	0	2	2
CDIF630erm_00352	CDIF630erm_00352	putative flagellar biosynthesis protein	Cytoplasmic	Cellular processes	Chemotaxis and motility	x				21.758	17.8697	NaN	NaN	NaN	NaN	NaN	NaN	NaN	5	3	2	1	1	0	0	1	1
CDIF630erm_00353	FlgK	flagellar hook-associated protein FlgK (or HAP1)	Unknown	Cellular processes	Chemotaxis and motility	x		x		20.8605	18.4253	19.9638	20.8342	21.5793	21.5854	23.1643	24.9077	25.0358	8	3	3	2	10	7	11	19	15
CDIF630erm_00354	FlgL	flagellar hook-associated protein FlgL (or HAP3)	Extracellular	Cellular processes	Chemotaxis and motility	x	x			18.4835	19.2364	19.5848	22.6432	20.4495	NaN	21.4393	23.8839	23.3684	2	2	3	3	5	1	5	9	8
CDIF630erm_00355	FliW	flagellar assembly factor FliW	Cytoplasmic	Cell envelope	Surface structures					27.4067	25.1178	26.8736	24.6414	25.5369	24.7545	24.7905	21.9279	NaN	7	7	7	3	6	3	3	2	1
CDIF630erm_00357	FliS1	flagellar protein FliS	Cytoplasmic	Cellular processes	Chemotaxis and motility	x	x			21.9286	21.5912	NaN	22.7688	22.7505	22.9182	NaN	23.8515	22.5595	3	2	1	2	2	2	1	2	2
CDIF630erm_00359	FliD	flagellar hook-associated protein 2 FliD (or HAP2)	Extracellular	Cellular processes	Chemotaxis and motility	x		x		21.9786	22.6215	22.6444	22.5073	22.7545	22.7106	24.5922	26.1593	25.0235	12	13	12	10	13	12	9	23	12
CDIF630erm_00361	FliC	flagellin C	Unknown	Cellular processes	Chemotaxis and motility			x		31.8627	28.2	28.5063	33.2813	31.5381	34.0912	34.6074	34.9784	34.173	23	17	17	18	22	30	26	28	26
CDIF630erm_00362	CDIF630erm_00362	flagellin N-acetylglucosamine transferase	Cytoplasmic	Cell envelope	Biosynthesis and degradation of surface polysaccharides and lipopolysaccharides	x	x			26.985	28.1816	28.2951	23.7049	26.1634	24.0884	23.9462	24.8084	24.1027	31	39	40	6	22	10	4	19	11
CDIF630erm_00363	CDIF630erm_00363	phosphothreonine phosphatase	Cytoplasmic	Unknown function	Enzymes of unknown specificity					21.2524	23.5083	23.7732	23.0145	23.8561	20.3446	22.8289	22.3865	23.7248	5	6	5	5	6	2	4	5	4
CDIF630erm_00364	CDIF630erm_00364	flagellin phosphothreonine transferase	Cytoplasmic	Energy metabolism	Sugars					20.9201	24.6972	24.6943	21.7279	23.2309	21.3774	21.2488	21.5137	23.2691	8	10	9	4	9	3	4	3	5
CDIF630erm_00365	CDIF630erm_00365	flagellin methyltransferase	Cytoplasmic	Cell envelope	Biosynthesis and degradation of surface polysaccharides and lipopolysaccharides					25.3494	26.3472	26.997	NaN	26.2156	NaN	NaN	21.5757	25.1234	8	10	9	2	9	0	1	2	6
CDIF630erm_00366	CDIF630erm_00366	flagellin phosphotransferase	Cytoplasmic	Cell envelope	Biosynthesis and degradation of murein sacculus and peptidoglycan		x			25.434	26.2983	26.8937	23.5971	25.3981	20.4166	22.1184	21.2789	21.8323	12	14	13	5	12	3	4	3	3
CDIF630erm_00369	FlgC	flagellar basal-body rod protein FlgC	Cytoplasmic	Cellular processes	Chemotaxis and motility	x				NaN	NaN	NaN	NaN	18.5493	NaN	NaN	24.4043	23.1199	0	0	0	0	3	0	0	7	6
CDIF630erm_00371	FliF	flagellar M-ring protein FliF	CytoplasmicMembrane	Cellular processes	Chemotaxis and motility	x	x	x		22.4158	19.5029	19.1357	26.447	24.5949	26.5523	27.0793	27.3091	27.3458	4	5	3	8	10	9	9	16	15
CDIF630erm_00372	FliG	flagellar motor switch protein FliG	Cytoplasmic	Cellular processes	Chemotaxis and motility	x				22.8774	18.9639	18.2034	NaN	22.1119	19.2203	20.5073	21.7247	20.5827	10	3	4	1	7	2	5	7	5
CDIF630erm_00373	FliH	flagellar assembly protein FliH	Cytoplasmic	Cellular processes	Chemotaxis and motility					18.7799	20.3367	21.0239	NaN	18.8595	NaN	NaN	NaN	NaN	3	7	5	0	4	0	0	1	1
CDIF630erm_00376	FliK	flagellar hook-length control protein FliK	Unknown	Cellular processes	Chemotaxis and motility					19.751	NaN	NaN	NaN	NaN	NaN	19.6893	19.0759	20.4291	5	1	1	0	1	1	3	2	3
CDIF630erm_00378	FlgE	flagellar hook protein FlgE (Distal rod protein)	Extracellular	Cellular processes	Chemotaxis and motility	x	x			22.3577	21.9384	22.783	23.7348	25.2304	24.2591	24.8761	26.8682	25.6312	7	9	10	10	12	7	11	17	16
CDIF630erm_00379	FlbD	flagellar protein FlbD	Unknown	Cellular processes	Chemotaxis and motility					22.2451	20.5063	20.4238	NaN	20.1479	NaN	NaN	22.6842	NaN	5	4	3	1	3	0	0	2	1
CDIF630erm_00380	MotA	flagellar motor rotation protein MotA	CytoplasmicMembrane	Cellular processes	Chemotaxis and motility					NaN	NaN	NaN	NaN	21.4217	NaN	NaN	24.538	24.0479	1	0	0	1	3	1	1	5	5
CDIF630erm_00381	MotB	flagellar motor rotation protein MotB (chemotaxis protein MotB)	CytoplasmicMembrane	Cellular processes	Chemotaxis and motility	x		x		NaN	NaN	19.5624	21.699	17.6751	NaN	NaN	21.8919	21.9871	3	3	2	3	3	0	1	5	5
CDIF630erm_00382	FliL	flagellar basal body-associated protein FliL	Unknown	Cellular processes	Chemotaxis and motility		x			19.4232	18.1985	NaN	25.9889	24.5709	26.1439	24.823	25.4561	25.4582	2	2	1	5	6	5	5	5	6
CDIF630erm_00383	FliZ	flagellar protein FliZ	Unknown	Cellular processes	Chemotaxis and motility					NaN	NaN	NaN	NaN	19.6042	21.9231	NaN	21.5417	22.0144	1	1	0	1	2	2	1	3	2
CDIF630erm_00389	FlhG	flagellar number regulator FlhG	CytoplasmicMembrane	Cellular processes	Chemotaxis and motility					NaN	20.9833	21.2166	NaN	20.4408	NaN	NaN	NaN	NaN	1	4	4	1	4	0	0	1	1
CDIF630erm_00392	FlgG1	flagellar basal-body rod protein FlgG	Extracellular	Cellular processes	Chemotaxis and motility	x		x		NaN	18.3558	17.8982	18.4384	20.3043	20.4687	22.5001	23.7167	23.273	1	2	3	2	3	2	4	5	6
CDIF630erm_00393	FlgG2	flagellar basal body rod protein FlgG	Extracellular	Cellular processes	Chemotaxis and motility	x				NaN	NaN	NaN	NaN	20.0415	NaN	20.5635	23.2802	20.4198	1	1	1	2	3	1	3	6	5
CDIF630erm_00394	FliM	flagellar motor switch protein FliM	CytoplasmicMembrane	Cellular processes	Chemotaxis and motility		x	x		22.7002	23.8104	23.5859	21.0356	21.6492	NaN	NaN	23.3941	22.0974	7	11	8	2	5	1	0	2	2
CDIF630erm_00395	FliN2	flagellar motor switch protein FliN	CytoplasmicMembrane	Cellular processes	Chemotaxis and motility	x				22.2578	NaN	21.0927	22.0895	23.2757	NaN	21.6079	22.0384	23.3209	4	1	3	2	2	1	2	2	2
CDIF630erm_00397	HtpG	heat shock protein HtpG	Cytoplasmic	Cellular processes	Adaptations to atypical conditions		x			28.1375	28.4398	28.2179	25.8366	27.3627	25.6804	25.2122	24.7332	25.9251	28	35	32	9	19	9	9	8	9
CDIF630erm_00420	CDIF630erm_00420	putative iron-sulfur-binding protein	Unknown	Unknown function	Unknown function					NaN	20.2508	19.8964	NaN	NaN	NaN	NaN	NaN	NaN	0	4	3	0	1	1	1	0	0
CDIF630erm_00434	CDIF630erm_00434	putative hydrolase, HAD superfamily, subfamily IB	Cytoplasmic	Unknown function	Enzymes of unknown specificity				x	19.3179	20.0089	19.7924	NaN	NaN	NaN	NaN	NaN	NaN	2	2	2	0	1	0	0	0	0
CDIF630erm_00438	CDIF630erm_00438	cadmium, zinc and cobalt-transporting ATPase	CytoplasmicMembrane	Transport and binding proteins	Cations and iron carrying compounds		x			NaN	19.359	19.9607	22.2989	22.6416	NaN	NaN	22.333	23.7388	1	5	3	2	5	2	2	6	7
CDIF630erm_00457	ApeB	aminipeptidase ApeB	Cytoplasmic	Protein fate	Degradation of proteins, peptides, and glycopeptides					21.3944	21.8809	21.8135	NaN	20.1296	NaN	19.5878	18.9628	NaN	6	7	6	1	4	1	2	3	0
CDIF630erm_00458	CDIF630erm_00458	phospholipase, patatin family	Unknown	Unknown function	Unknown function	x				23.7124	23.0731	22.4548	NaN	21.5565	NaN	NaN	18.8298	18.9987	9	9	7	0	7	0	0	2	2
CDIF630erm_00459	PpiB	peptidyl-prolyl cis-trans isomerase B	Cytoplasmic	Protein fate	Protein folding and stabilization	x				26.6587	26.0729	26.0899	24.6588	26.1572	24.2414	26.0516	24.3543	24.4241	9	12	9	6	8	4	5	6	6
CDIF630erm_00461	CDIF630erm_00461	cobalt-dependent inorganic pyrophosphatase	Cytoplasmic	Energy metabolism	Other	x				25.9839	27.5638	27.6103	23.845	26.3929	25.209	24.6481	24.5869	24.2225	29	35	32	9	21	10	11	11	8
CDIF630erm_00468	CDIF630erm_00468	uncharacterized protein	CytoplasmicMembrane	Unknown function	Unknown function					27.0497	29.0218	28.6413	26.4438	28.3209	21.6932	26.2347	23.2082	23.3761	25	45	32	14	21	6	12	5	8
CDIF630erm_00469	CDIF630erm_00469	uncharacterized protein	Cytoplasmic	Unknown function	Unknown function					20.7671	18.2735	18.7853	NaN	20.9993	21.4591	NaN	19.5944	NaN	6	3	4	0	6	3	0	2	0
CDIF630erm_00472	CDIF630erm_00472	putative beta-lactamase-like protein	Cytoplasmic	Cell envelope	Biosynthesis and degradation of murein sacculus and peptidoglycan				x	18.3699	19.258	20.6196	NaN	NaN	NaN	NaN	NaN	NaN	3	3	3	0	2	0	0	0	0
CDIF630erm_00478	CDIF630erm_00478	putative hydrolase, HAD superfamily	Cytoplasmic	Unknown function	Enzymes of unknown specificity					NaN	19.3702	20.1682	NaN	20.32	NaN	NaN	NaN	NaN	1	3	3	1	3	0	1	1	1
CDIF630erm_00480	CDIF630erm_00480	transcriptional regulator, RmlC-type	Cytoplasmic	Regulatory functions	DNA interactions				x	18.4384	19.7768	21.0459	NaN	18.7981	NaN	NaN	NaN	NaN	3	2	3	0	3	0	0	0	0
CDIF630erm_00520	CDIF630erm_00520	putative radical SAM-family protein	Cytoplasmic	Energy metabolism	Anaerobic	x				NaN	19.0668	20.36	NaN	19.042	NaN	20.406	NaN	NaN	3	4	2	1	2	1	2	1	1
CDIF630erm_00522	LdhA	(R)-2-hydroxyisocaproate dehydrogenase	Cytoplasmic	Energy metabolism	Other	x	x			29.54	29.4183	29.4834	25.4161	27.9603	25.7396	25.6342	25.1324	24.793	24	25	24	12	23	12	13	12	9
CDIF630erm_00523	HadA	isocaprenoyl-CoA:2-hydroxyisocaproate CoA-transferase	Cytoplasmic	Fatty acid and phospholipid metabolis	Other	x	x	x		29.6025	29.8038	29.9272	27.5099	29.2833	28.3183	27.5023	27.3369	26.7811	29	35	32	15	29	19	17	16	16
CDIF630erm_00524	HadI	activator of 2-hydroxyisocaproyl-CoA dehydratase	Cytoplasmic	Unknown function	Unknown function					21.9859	23.0088	23.6172	NaN	23.0121	NaN	22.1662	21.9323	NaN	6	6	5	1	5	0	2	3	1
CDIF630erm_00525	HadB	2-hydroxyisocaproyl-CoA dehydratase, alpha subunit	Cytoplasmic	Fatty acid and phospholipid metabolism	Other	x	x			26.7528	26.3241	26.3619	22.7684	26.0279	24.4568	24.633	24.4252	24.5283	19	19	18	5	14	6	7	7	7
CDIF630erm_00526	HadC	2-hydroxyisocaproyl-CoA dehydratase, beta subunit	Cytoplasmic	Energy metabolism	Anaerobic	x				27.7111	26.7447	26.3361	24.2784	26.3542	25.675	24.7178	24.5323	24.8688	18	19	16	5	14	9	8	5	6
CDIF630erm_00527	AcdB	isocaproyl-CoA dehydrogenase, catalytic subunit	Cytoplasmic	Fatty acid and phospholipid metabolis	Degradation		x			29.9593	30.4925	30.1927	28.0534	29.748	28.7856	28.7047	28.5719	27.9374	21	22	21	13	20	14	16	16	12
CDIF630erm_00528	EtfB1	isocaproyl-CoA dehydrogenase, electron transfer flavoprotein beta subunit	Cytoplasmic	Energy metabolism	Electron transport	x	x			30.529	29.8831	29.9119	28.0292	28.9484	27.666	28.687	27.8633	28.7933	21	20	16	7	16	9	9	10	13
CDIF630erm_00529	EtfA1	isocaproyl-CoA dehydrogenase, electron transfer flavoprotein alpha subunit	Cytoplasmic	Energy metabolism	Electron transport	x	x			31.3378	30.3093	30.1369	27.8277	29.9525	28.2859	27.6937	28.3335	27.6388	22	22	19	10	19	10	9	13	12
CDIF630erm_00531	Fba	fructose-1,6-bisphosphate aldolase	Cytoplasmic	Energy metabolism	Glycolysis/gluconeogenesis		x	x		28.6498	29.6346	29.5303	25.7059	28.4745	25.6816	25.1118	25.4573	23.7469	21	22	19	11	19	7	11	10	11
CDIF630erm_00532	CDIF630erm_00532	putative tautomerase	Cytoplasmic	Unknown function	Unknown function					20.8472	NaN	18.4255	NaN	17.7878	NaN	NaN	NaN	NaN	4	1	2	0	2	0	0	0	0
CDIF630erm_00534	CDIF630erm_00534	putative RNA methyltransferase	Cytoplasmic	Protein synthesis	tRNA and rRNA base modification					20.9212	20.6025	21.7312	NaN	NaN	NaN	NaN	NaN	NaN	4	4	5	1	2	1	1	1	1
CDIF630erm_00550	CDIF630erm_00550	putative conjugative transposon protein Tn1549-like, CTn2	CytoplasmicMembrane	Unknown function	Unknown function					19.4885	19.7667	20.2323	NaN	20.5086	NaN	NaN	NaN	NaN	2	3	2	0	4	0	0	0	1
CDIF630erm_00568	Cwp27	putative cell wall binding protein	Cellwall	Cell envelope	Other					NaN	NaN	NaN	NaN	NaN	NaN	NaN	20.0081	21.075	0	1	0	2	1	0	2	2	2
CDIF630erm_00615	CDIF630erm_00615	omega-amidase NIT2	Cytoplasmic	Central intermediary metabolism	Nitrogen metabolism					20.7849	NaN	19.9931	NaN	NaN	NaN	NaN	NaN	NaN	2	1	2	0	2	0	0	1	0
CDIF630erm_00618	PurC1	phosphoribosylaminoimidazole-succinocarboxamide synthetase	Cytoplasmic	Purines, pyrimidines, nucleosides, and nucleotides	Purine ribonucleotide biosynthesis	x				21.6355	23.316	22.7184	NaN	22.5209	NaN	NaN	20.7183	20.6721	4	8	5	0	7	0	1	2	2
CDIF630erm_00620	CDIF630erm_00620	PTS system, ribitol-specific IIA component	Cytoplasmic	Signal transduction	PTS					19.426	19.6666	NaN	NaN	NaN	NaN	NaN	NaN	NaN	2	2	1	0	0	0	0	1	0
CDIF630erm_00626	CwpV	putative hemagglutinin/adhesin	Cellwall	Cellular processes	Pathogenesis	x	x			27.9059	27.7778	27.9505	30.2063	29.1263	31.3369	30.0624	30.3514	30.3843	30	30	28	36	40	36	40	43	39
CDIF630erm_00627	DacF1	serine-type D-ala-D-ala carboxypeptidase	CytoplasmicMembrane	Cell envelope	Biosynthesis and degradation of murein sacculus and peptidoglycan					19.8647	20.2643	20.5175	NaN	19.86	NaN	NaN	NaN	NaN	4	6	5	0	2	0	1	1	0
CDIF630erm_00631	CDIF630erm_00631	hypothetical protein	CytoplasmicMembrane	Unknown function	Unknown function					23.1998	24.9173	24.2602	24.2179	24.759	23.0409	23.8938	25.6455	24.9396	2	2	2	2	3	2	2	3	3
CDIF630erm_00633	CDIF630erm_00633	two-component response regulator	Cytoplasmic	Signal transduction	Two-component systems	x				NaN	19.2629	18.3129	NaN	17.6591	NaN	NaN	NaN	NaN	1	2	2	0	2	0	0	0	0
CDIF630erm_00641	CDIF630erm_00641	putative amidohydrolase	Cytoplasmic	Protein fate	Degradation of proteins, peptides, and glycopeptides		x			24.7423	22.8982	23.2507	NaN	20.2852	18.1212	NaN	18.0844	19.3726	15	12	11	1	6	2	1	3	3
CDIF630erm_00646	CheY	chemotaxis protein CheY	Cytoplasmic	Cellular processes	Chemotaxis and motility	x				20.8314	20.9032	NaN	NaN	NaN	NaN	NaN	NaN	NaN	2	3	1	0	0	0	0	0	1
CDIF630erm_00651	CDIF630erm_00651	putative methyl-accepting chemotaxis receptor, MCP family	CytoplasmicMembrane	Cellular processes	Chemotaxis and motility					NaN	22.0099	NaN	21.3935	22.4216	22.4831	22.091	24.734	24.4449	1	3	1	2	3	6	7	9	8
CDIF630erm_00652	CheA	chemotaxis protein CheA	Cytoplasmic	Cellular processes	Chemotaxis and motility	x				NaN	18.485	21.6419	24.3463	21.4992	22.3188	21.402	21.5209	24.3706	1	3	2	9	6	7	4	9	11
CDIF630erm_00657	ArcB	Delta(1)-pyrroline-2-carboxylate reductase	Cytoplasmic	Amino acid biosynthesis	Glutamate family				x	19.5298	19.3508	19.1565	NaN	NaN	NaN	NaN	NaN	NaN	2	3	2	0	1	0	0	0	0
CDIF630erm_00658	CDIF630erm_00658	putative lipoprotein	Unknown	Unknown function	Unknown function			x		NaN	NaN	16.2431	22.3855	21.4242	21.6045	22.6382	24.6102	25.9482	1	1	2	4	7	3	4	8	12
CDIF630erm_00667	SpsB1	signal peptidase IB	CytoplasmicMembrane	Protein fate	Protein and peptide secretion and trafficking					NaN	NaN	19.4876	21.1209	22.9492	NaN	NaN	23.2935	22.4599	0	0	2	4	3	2	1	6	4
CDIF630erm_00670	ThrS/udk	fusion protein threonine-tRNA ligase/uridine kinase	Cytoplasmic	Purines, pyrimidines, nucleosides, and nucleotides	Nucleotide and nucleoside interconversions	x				19.498	NaN	NaN	NaN	20.982	NaN	20.0976	19.4271	NaN	5	4	4	0	5	0	2	2	0
CDIF630erm_00672	CDIF630erm_00672	transcriptional regulator, ArsR family	Cytoplasmic	Regulatory functions	DNA interactions					20.5055	21.4501	20.1758	NaN	19.9973	NaN	NaN	NaN	NaN	4	3	3	0	2	0	0	0	1
CDIF630erm_00674	CDIF630erm_00674	putative aldo/keto reductase	Cytoplasmic	Energy metabolism	Electron transport	x				20.4091	NaN	19.7717	NaN	19.4604	NaN	NaN	NaN	NaN	3	1	3	0	3	0	0	1	0
CDIF630erm_00679	TrmL	putative tRNA (cytidine(34)-2'-o)-methyltransferase	Cytoplasmic	Protein synthesis	tRNA and rRNA base modification					21.0658	21.1325	21.1684	NaN	22.5075	NaN	NaN	NaN	NaN	3	3	3	0	3	0	0	0	1
CDIF630erm_00680	CDIF630erm_00680	uncharacterized protein, DegV family	Cytoplasmic	Unknown function	Unknown function	x				20.3969	20.2017	NaN	NaN	20.5373	NaN	NaN	NaN	NaN	3	4	1	0	2	1	0	0	0
CDIF630erm_00685	CDIF630erm_00685	putative membrane protein	Cytoplasmic	Hypothetical proteins	Domain			x		NaN	NaN	NaN	22.8859	22.7397	NaN	NaN	23.7753	23.093	1	0	0	2	2	1	1	3	2
CDIF630erm_00687	ThrS	threonine-tRNA ligase	Cytoplasmic	Protein synthesis	tRNA aminoacylation	x	x			27.7039	27.1454	26.9123	23.6579	25.7345	24.6108	25.039	24.7736	25.127	31	30	28	6	21	10	9	12	8
CDIF630erm_00700	CDIF630erm_00700	uncharacterized protein	Unknown	Unknown function	Unknown function					20.0747	20.6504	21.2831	NaN	20.5838	NaN	NaN	NaN	NaN	2	2	3	1	3	0	1	0	1
CDIF630erm_00701	CDIF630erm_00701	uncharacterized protein	CytoplasmicMembrane	Unknown function	Unknown function					21.4013	20.1467	20.5418	NaN	21.9241	NaN	NaN	NaN	NaN	3	3	3	0	3	1	1	1	0
CDIF630erm_00715	CDIF630erm_00715	hypothetical protein	Cytoplasmic	n.d.	n.d.					NaN	20.4272	20.0742	NaN	NaN	NaN	NaN	NaN	NaN	0	3	3	0	0	0	0	0	1
CDIF630erm_00760	CDIF630erm_00760	transcriptional regulator, GntR family	Cytoplasmic	Regulatory functions	DNA interactions					NaN	20.5835	20.1346	NaN	18.8313	NaN	NaN	NaN	NaN	1	4	3	0	3	1	0	0	0
CDIF630erm_00776	ToxA	toxin A	Extracellular	Cellular processes	Pathogenesis					25.6804	28.3688	27.5368	24.7077	28.1626	19.7407	24.8489	20.9166	21.1574	47	74	64	26	45	8	12	5	7
CDIF630erm_00787	CDIF630erm_00787	uncharacterized protein, GTP cyclohydrolase-like	Cytoplasmic	Unknown function	Unknown function	x				26.8167	26.0796	25.109	NaN	25.6945	20.8216	22.0748	23.0405	21.3918	14	14	12	0	12	2	4	7	4
CDIF630erm_00798	InfC	translation initiation factor IF-3	Cytoplasmic	Protein synthesis	Translation factors			x		25.3392	22.668	23.1339	23.7453	23.9201	NaN	22.3628	22.6752	22.7359	7	5	4	5	4	1	2	4	3
CDIF630erm_00800	RplT	50S ribosomal protein L20	Cytoplasmic	Protein synthesis	Ribosomal proteins: synthesis and modification	x				25.8901	23.08	23.0247	23.737	21.3751	21.5437	NaN	25.0953	25.0348	7	7	4	2	4	1	1	6	5
CDIF630erm_00811	KtrC	ktr system potassium uptake protein C	CytoplasmicMembrane	Transport and binding proteins	Cations and iron carrying compounds					NaN	NaN	19.9918	23.6125	21.1296	21.0797	22.5103	21.6324	23.4297	0	1	2	5	5	2	4	5	6
CDIF630erm_00814	PheS	phenylalanyl-tRNA synthetase alpha chain	Cytoplasmic	Protein synthesis	tRNA aminoacylation	x				24.4956	23.9569	24.1939	NaN	24.6082	NaN	19.1744	18.6765	20.1672	16	12	14	0	11	1	2	3	4
CDIF630erm_00815	PheT	phenylalanyl-tRNA synthetase subunit beta	Cytoplasmic	Protein synthesis	tRNA aminoacylation		x			27.1296	27.7676	27.5847	25.6544	26.5025	25.5235	25.0569	25.0623	25.7099	33	40	40	9	30	12	12	11	12
CDIF630erm_00818	CDIF630erm_00818	putative peptidase, U32 family	Cytoplasmic	Energy metabolism	Amino acids and amines	x				19.4039	18.3976	NaN	NaN	NaN	NaN	NaN	NaN	NaN	3	3	3	0	3	0	1	0	0
CDIF630erm_00819	CDIF630erm_00819	putative metal-dependent phosphohydrolase	Cytoplasmic	Unknown function	Unknown function	x				NaN	19.8432	20.1426	NaN	18.4197	NaN	NaN	NaN	NaN	0	2	2	0	2	0	0	0	0
CDIF630erm_00821	CDIF630erm_00821	putative nitroreductase-like oxidoreductase	Cytoplasmic	Energy metabolism	Anaerobic		x			22.9065	23.5001	23.0986	NaN	22.3857	21.8225	22.5501	21.4381	NaN	4	7	4	1	5	2	3	2	1
CDIF630erm_00823	PepD	cytosol non-specific dipeptidase	Cytoplasmic	Protein fate	Degradation of proteins, peptides, and glycopeptides	x	x			26.9802	26.844	26.5707	24.9671	25.8618	24.0138	25.2051	24.4548	25.3594	10	11	12	5	9	5	6	6	7
CDIF630erm_00824	MutS2	endonuclease MutS2	Cytoplasmic	DNA metabolism	Other	x				23.2998	23.2513	23.1588	NaN	23.4056	19.9714	19.9141	NaN	NaN	11	17	17	1	13	2	4	1	0
CDIF630erm_00826	ArgS	arginine-tRNA ligase	Cytoplasmic	Protein synthesis	tRNA aminoacylation					25.7523	26.6836	26.3477	23.5566	25.9728	25.3905	26.0226	23.44	23.0699	31	36	30	10	22	16	17	10	7
CDIF630erm_00828	CDIF630erm_00828	hypothetical protein	Extracellular	Unknown function	General					21.8611	21.6416	21.0891	NaN	NaN	NaN	NaN	NaN	NaN	3	4	1	0	0	0	0	0	1
CDIF630erm_00830	CDIF630erm_00830	tetratricopeptide repeat protein	Cytoplasmic	Unknown function	Unknown function	x			x	19.6964	20.3377	20.9533	NaN	20.6143	NaN	NaN	NaN	NaN	3	5	6	0	4	0	0	0	0
CDIF630erm_00834	Fhs	formate-tetrahydrofolate ligase	Cytoplasmic	Central intermediary metabolism	One-carbon metabolism	x	x			26.7326	27.2011	26.8162	24.607	26.6922	25.2768	26.1994	25.0178	24.6542	21	25	20	8	20	10	15	13	9
CDIF630erm_00836	FolD	bifunctional methylenetetrahydrofolate dehydrogenase (NADP+)/methenyl tetrahydrofolate cyclohydrolase	Cytoplasmic	Central intermediary metabolism	One-carbon metabolism					NaN	21.0945	20.4102	NaN	21.9159	NaN	NaN	NaN	NaN	0	5	5	1	2	1	1	1	1
CDIF630erm_00843	AcsE	5-methyltetrahydrofolate:corrinoid/iron-sulfur protein co-methyltransferase	Cytoplasmic	Energy metabolism	Anaerobic	x				19.886	20.4884	21.0508	NaN	NaN	NaN	NaN	NaN	NaN	3	3	3	0	1	0	0	1	1
CDIF630erm_00850	CDIF630erm_00850	putative RNA-binding protein	Cytoplasmic	Unknown function	Unknown function					NaN	21.1747	22.1904	NaN	NaN	NaN	NaN	NaN	NaN	1	2	2	0	1	0	0	0	0
CDIF630erm_00851	CDIF630erm_00851	hypothetical protein	Unknown	Unknown function	Unknown function					22.4459	22.4254	22.3561	NaN	21.0668	NaN	NaN	NaN	NaN	3	3	2	1	3	0	1	0	1
CDIF630erm_00852	CDIF630erm_00852	uncharacterized protein	Cytoplasmic	Unknown function	Unknown function					20.598	19.5448	NaN	NaN	NaN	NaN	NaN	NaN	NaN	3	2	0	0	1	0	0	0	0
CDIF630erm_00861	CDIF630erm_00861	putative MotA/TolQ/ExbB proton channel	CytoplasmicMembrane	Cellular processes	Chemotaxis and motility	x				NaN	NaN	NaN	NaN	18.0213	NaN	NaN	19.4804	21.5602	0	0	0	1	2	1	1	2	2
CDIF630erm_00864	CDIF630erm_00864	putative lipoprotein	Unknown	Unknown function	Unknown function	x				18.3892	NaN	NaN	21.4371	20.8808	22.3739	22.0155	23.7437	21.4127	2	1	1	7	8	7	6	12	7
CDIF630erm_00872	ThiI	sulfurtransferase ThiI	Cytoplasmic	Protein synthesis	tRNA and rRNA base modification	x				21.16	19.5066	21.3129	18.8546	20.7907	NaN	NaN	NaN	19.2663	4	4	4	2	3	0	1	1	2
CDIF630erm_00874	CDIF630erm_00874	putative nitroreductase-like oxidoreductase	Unknown	Central intermediary metabolism	Nitrogen metabolism					22.6151	20.8222	21.3185	NaN	21.4937	NaN	NaN	19.9978	NaN	4	3	2	1	2	1	1	2	1
CDIF630erm_00876	PflA	formate C-acetyltransferase activating enzyme	Cytoplasmic	Protein fate	Protein modification and repair					23.1046	23.2402	23.1493	NaN	22.3277	NaN	NaN	NaN	NaN	8	8	6	1	5	0	1	1	2
CDIF630erm_00877	PlfB	formate C-acetyltransferase	Cytoplasmic	Energy metabolism	Fermentation		x			31.0426	31.5099	31.2718	28.7816	29.9589	29.823	28.4989	29.7079	29.5744	52	56	54	25	44	32	23	32	31
CDIF630erm_00879	CshA1	DEAD-box ATP-dependent RNA helicase CshA	Cytoplasmic	DNA metabolism	DNA replication, recombination, and repair	x	x			23.3847	24.231	23.5255	20.6136	22.1291	20.0186	NaN	21.4444	NaN	10	14	9	2	8	2	0	2	1
CDIF630erm_00889	SpoIIAB	anti-sigma F factor (stage II sporulation protein AB)	Cytoplasmic	Cellular processes	Sporulation and germination					18.7323	19.5938	19.1753	NaN	18.6215	NaN	NaN	NaN	18.9682	2	4	4	0	3	0	0	1	3
CDIF630erm_00899	CDIF630erm_00899	putative penicillin-binding protein	CytoplasmicMembrane	Cell envelope	Biosynthesis and degradation of murein sacculus and peptidoglycan		x			22.01	20.8863	19.8136	27.1933	26.361	27.7018	26.4135	27.2235	27.3985	12	9	6	18	18	22	12	22	22
CDIF630erm_00904	CDIF630erm_00904	ABC-type transport system, ATP-binding protein	Cytoplasmic	Transport and binding proteins	Amino acids, peptides and amines	x		x		22.9324	22.5085	23.4583	20.7907	23.6947	21.5539	NaN	19.3115	19.3535	7	11	8	3	10	3	1	2	3
CDIF630erm_00907	CDIF630erm_00907	putative GTP-binding protein, HflX type	Cytoplasmic	Unknown function	Unknown function	x				21.4933	18.7301	18.6071	NaN	19.3086	NaN	NaN	18.9234	NaN	3	2	3	1	2	0	1	3	2
CDIF630erm_00909	CDIF630erm_00909	putative hydrolase, NUDIX family	Unknown	DNA metabolism	DNA replication, recombination, and repair			x		22.9266	24.7916	23.9816	22.8232	22.7644	NaN	NaN	22.0624	22.0134	3	6	7	3	5	0	0	3	3
CDIF630erm_00913	NadE	NAD+ synthase	Cytoplasmic	Biosynthesis of cofactors, prosthetic groups, and carriers	Pyridine nucleotides	x				23.8773	22.1994	22.6506	NaN	22.7736	NaN	NaN	NaN	NaN	6	6	4	1	5	1	1	1	0
CDIF630erm_00914	CDIF630erm_00914	transcriptional regulatory protein	Cytoplasmic	Regulatory functions	DNA interactions	x				24.5299	26.5531	25.7349	16.6104	22.7727	NaN	18.0552	19.5352	17.3814	8	9	7	3	7	1	2	3	3
CDIF630erm_00926	CDIF630erm_00926	uncharacterized protein	Cytoplasmic	Unknown function	Unknown function	x				23.5835	24.5556	24.3463	NaN	22.5963	NaN	NaN	NaN	22.3983	9	10	9	0	6	0	0	1	3
CDIF630erm_00928	FloX	putative flavodoxin	Cytoplasmic	Energy metabolism	Electron transport					22.3852	21.5065	22.8377	23.1037	24.2681	NaN	23.4656	21.4929	NaN	5	4	4	2	6	0	4	5	1
CDIF630erm_00930	CDIF630erm_00930	putative universal stress protein A (UspA)	Cytoplasmic	Cellular processes	Adaptations to atypical conditions	x				24.2391	24.9499	24.6472	26.0454	24.844	26.1555	25.7168	25.5887	25.1536	11	13	9	8	9	10	6	8	9
CDIF630erm_00931	CDIF630erm_00931	PTS system, fructose-type IIB component	Cytoplasmic	Signal transduction	PTS					23.4692	21.9789	NaN	NaN	NaN	NaN	NaN	21.8141	NaN	3	3	1	0	1	0	0	2	0
CDIF630erm_00936	BglC	6-phospho-beta-glucosidase	Cytoplasmic	Energy metabolism	Glycolysis/gluconeogenesis					19.6877	18.7984	19.3911	NaN	20.8021	NaN	19.7281	NaN	NaN	4	2	3	0	4	0	2	0	0
CDIF630erm_00944	Rbr1	putative rubrerythrin	Cytoplasmic	Cellular processes	Adaptations to atypical conditions	x	x			32.1263	31.3633	31.0306	27.678	29.9295	28.0934	27.8893	28.4791	29.4483	24	23	16	12	16	7	8	12	15
CDIF630erm_00945	PerR	peroxide-responsive repressor	Cytoplasmic	Regulatory functions	DNA interactions	x				24.7774	24.7589	25.2081	21.0264	24.8307	NaN	NaN	NaN	20.1376	5	5	5	2	6	1	0	1	4
CDIF630erm_00946	Dsr	desulfoferrodoxin	Unknown	Energy metabolism	Electron transport	x				29.2556	28.8065	28.9609	28.4488	28.7665	28.9889	29.7333	27.3144	27.2546	10	11	7	6	8	4	4	4	4
CDIF630erm_00947	CDIF630erm_00947	oxidative stress glutamate dehydrogenase (glutamate synthase-like) (rubredoxin)	Cytoplasmic	Cellular processes	Adaptations to atypical conditions	x	x	x		30.837	30.991	31.7799	30.42	30.3401	30.6226	30.3099	29.8565	29.1778	41	42	41	21	33	24	28	23	25
CDIF630erm_00948	CDIF630erm_00948	putative metallo-beta-lactamase superfamily protein	Cytoplasmic	Cell envelope	Biosynthesis and degradation of murein sacculus and peptidoglycan	x				15.846	20.2274	21.5539	NaN	16.1897	NaN	NaN	NaN	NaN	2	3	2	0	3	0	1	1	0
CDIF630erm_00952	AcnB	aconitate hydratase	Cytoplasmic	Energy metabolism	TCA cycle					21.4361	22.0994	23.0011	NaN	19.057	NaN	NaN	NaN	NaN	8	8	9	0	2	0	0	1	1
CDIF630erm_00954	CDIF630erm_00954	transcriptional regulator, MarR family	Cytoplasmic	Regulatory functions	DNA interactions					NaN	16.6967	17.2775	19.7706	NaN	NaN	NaN	21.071	22.0572	0	2	2	2	1	1	0	3	3
CDIF630erm_00955	CDIF630erm_00955	putative acetyltransferase	Cytoplasmic	Central intermediary metabolism	Other				x	19.2068	20.2718	19.9054	NaN	20.7367	NaN	NaN	NaN	NaN	3	3	4	0	4	0	0	0	0
CDIF630erm_00959	CDIF630erm_00959	putative isomerase/hydrolase	Cytoplasmic	Energy metabolism	Other					20.2923	21.4413	22.0048	NaN	20.0842	NaN	NaN	NaN	19.2866	3	4	6	0	2	0	0	1	2
CDIF630erm_00960	PurH'	phosphoribosylaminoimidazolecarboxamide formyltransferase	Unknown	Purines, pyrimidines, nucleosides, and nucleotides	Purine ribonucleotide biosynthesis	x	x			23.4206	22.7607	22.6482	18.6864	20.7876	NaN	19.0646	NaN	18.2692	9	8	10	2	4	0	3	0	3
CDIF630erm_00963	Cwp25	putative cell wall-binding protein	Cellwall	Cell envelope	Biosynthesis and degradation of murein sacculus and peptidoglycan		x			24.29	24.3241	24.3861	21.6163	23.189	23.3542	22.2329	22.6992	21.9508	7	7	6	3	6	3	3	2	6
CDIF630erm_00968	CDIF630erm_00968	putative AbgB-like amidohydrolase	Cytoplasmic	Protein fate	Degradation of proteins, peptides, and glycopeptides	x			x	19.839	18.7859	19.5524	NaN	NaN	NaN	NaN	NaN	NaN	4	2	2	0	1	0	0	0	0
CDIF630erm_00974	OppA	ABC-type transport system, oligopeptide-family extracellular solute-binding protein	Cellwall	Transport and binding proteins	Amino acids, peptides and amines	x	x			23.5713	22.9664	23.4545	27.2364	25.8394	27.8664	26.4107	27.3865	26.6697	16	13	14	20	20	23	16	22	19
CDIF630erm_00992	Maa1	maltose O-acetyltransferase	Cytoplasmic	Energy metabolism	Sugars				x	18.1205	20.306	20.0462	NaN	17.962	NaN	NaN	NaN	NaN	2	3	2	0	2	0	0	0	0
CDIF630erm_00993	CDIF630erm_00993	ABC-type transport system, sugar-family extracellular solute-binding protein	Unknown	Transport and binding proteins	Carbohydrates, organic alcohols, and acids		x			26.0308	25.3812	25.9403	27.292	27.9282	27.4838	28.5013	28.79	27.837	15	12	14	14	14	17	16	15	13
CDIF630erm_00994	CDIF630erm_00994	ABC-type transport system, sugar-family ATP-binding protein	CytoplasmicMembrane	Transport and binding proteins	Carbohydrates, organic alcohols, and acids	x	x	x		21.5003	22.6343	24.2914	26.7928	26.7846	25.4144	26.9747	27.3799	27.8175	6	6	10	9	13	7	11	11	14
CDIF630erm_00998	CDIF630erm_00998	ABC-type transport system, sugar-specific permease	CytoplasmicMembrane	Transport and binding proteins	Carbohydrates, organic alcohols, and acids					NaN	NaN	NaN	NaN	NaN	NaN	NaN	22.3961	23.1609	0	0	0	1	0	0	1	3	3
CDIF630erm_01001	CDIF630erm_01001	putative protein modulating protease activity	Cytoplasmic	Protein fate	Protein modification and repair	x		x		NaN	21.0656	NaN	NaN	22.0849	22.819	NaN	24.5785	25.1573	1	2	0	1	2	4	0	6	6
CDIF630erm_01009	SpeH	S-adenosylmethionine decarboxylase proenzyme	Cytoplasmic	Central intermediary metabolism	Polyamine biosynthesis	x				19.2658	17.9632	NaN	NaN	18.369	NaN	NaN	NaN	NaN	2	2	0	0	2	0	0	0	0
CDIF630erm_01010	SpeE	spermidine synthase	Cytoplasmic	Central intermediary metabolism	Polyamine biosynthesis				x	21.6048	22.3504	22.6472	NaN	21.0577	NaN	NaN	NaN	NaN	3	6	4	0	3	0	0	0	0
CDIF630erm_01012	CspA	cold shock protein	Cytoplasmic	Cellular processes	Adaptations to atypical conditions					26.5722	25.8074	26.5372	24.7906	26.2309	23.1137	24.8026	24.3412	25.091	7	8	4	4	5	3	3	4	3
CDIF630erm_01013	CDIF630erm_01013	ferredoxin hydrogenase	Cytoplasmic	Unknown function	Unknown function	x				21.7459	21.5633	23.7822	NaN	22.9871	NaN	NaN	18.9792	19.8126	8	8	9	0	6	0	0	2	2
CDIF630erm_01014	CDIF630erm_01014	ferredoxin hydrogenase	Cytoplasmic	Energy metabolism	Electron transport	x				27.1419	26.7257	27.5617	NaN	27.0474	NaN	NaN	NaN	NaN	2	2	2	1	2	1	0	1	1
CDIF630erm_01018	CDIF630erm_01018	hypothetical protein	Cytoplasmic	Unknown function	Unknown function			x		24.2445	25.6042	25.6359	19.7577	24.5963	19.7933	17.4117	16.7315	16.2115	15	21	20	5	13	2	2	2	2
CDIF630erm_01020	OpuCA	ABC-type transport system, glycine betaine/carnitine/choline ATP-binding protein	CytoplasmicMembrane	Transport and binding proteins	Amino acids, peptides and amines		x	x		21.2548	23.0123	23.6521	26.0759	24.561	25.2957	26.1476	26.2025	26.8507	4	6	6	14	8	9	11	10	10
CDIF630erm_01021	OpuCC	ABC-type transport system, glycine betaine/carnitine/choline permease	CytoplasmicMembrane	Transport and binding proteins	Amino acids, peptides and amines	x		x		NaN	NaN	NaN	NaN	20.3394	20.5054	NaN	22.8575	21.1583	1	1	1	1	3	3	0	6	3
CDIF630erm_01026	CDIF630erm_01026	putative phage protein	Unknown	Unknown function	Unknown function	x				NaN	NaN	NaN	NaN	25.1326	NaN	26.3472	26.438	27.5035	2	1	1	0	3	1	2	4	3
CDIF630erm_01033	CDIF630erm_01033	putative phage protein	Unknown	Unknown function	Unknown function					21.7149	19.89	20.1205	NaN	20.5445	NaN	NaN	NaN	NaN	3	2	3	0	3	1	1	1	0
CDIF630erm_01121	RpsA	30S ribosomal protein S1	Cytoplasmic	Protein synthesis	Ribosomal proteins: synthesis and modification	x				27.0661	23.4451	24.301	27.6335	26.5447	27.0685	27.3948	26.8035	27.2502	19	12	13	17	16	18	15	16	15
CDIF630erm_01130	CDIF630erm_01130	putative serine-pyruvate aminotransferase	Cytoplasmic	Amino acid biosynthesis	Pyruvate family					22.2814	23.6244	24.2408	NaN	18.9322	NaN	NaN	17.6858	NaN	10	13	12	1	2	0	1	2	0
CDIF630erm_01132	CDIF630erm_01132	uncharacterized protein, UCP033563-like	Cytoplasmic	Unknown function	Unknown function	x				23.7783	NaN	18.5651	NaN	NaN	NaN	NaN	NaN	NaN	8	0	2	0	1	0	0	1	1
CDIF630erm_01135	CDIF630erm_01135	ABC-type transport system, nitrate/sulfonate/taurine extracellular solute-binding protein	Unknown	Transport and binding proteins	Anions		x			NaN	19.6758	19.4151	20.953	19.8028	NaN	20.4799	21.8684	18.4791	1	2	2	4	3	1	4	3	2
CDIF630erm_01138	CDIF630erm_01138	cys-tRNA(Pro)/cys-tRNA(Cys) deacylase	Cytoplasmic	Unknown function	Unknown function					19.8901	19.864	19.028	NaN	19.8064	NaN	NaN	19.996	NaN	2	4	2	0	3	0	0	2	0
CDIF630erm_01141	YtsJ	malate dehydrogenase (oxaloacetate-decarboxylating)	Cytoplasmic	Central intermediary metabolism	One-carbon metabolism				x	19.3817	19.5465	19.4824	NaN	19.6843	NaN	NaN	NaN	NaN	4	4	3	0	2	0	0	0	0
CDIF630erm_01142	CDIF630erm_01142	putative acyl-CoA N-acyltransferase	Cytoplasmic	Unknown function	Unknown function				x	20.4527	19.5036	20.0683	NaN	20.3317	NaN	NaN	NaN	NaN	3	3	3	1	3	0	0	0	0
CDIF630erm_01144	CDIF630erm_01144	S1 RNA binding domain protein	Unknown	Unknown function	Unknown function					22.4198	21.9069	20.8919	NaN	21.3923	NaN	20.8297	20.0136	NaN	4	8	7	0	7	1	4	6	1
CDIF630erm_01147	NagB	glucosamine-6-phosphate deaminase	Cytoplasmic	Central intermediary metabolism	Amino sugars					22.0314	21.254	21.8208	NaN	20.7796	NaN	NaN	NaN	NaN	3	4	4	0	3	0	1	0	0
CDIF630erm_01159	CDIF630erm_01159	putative transcriptional regulator, HTH	Cytoplasmic	Regulatory functions	DNA interactions					NaN	18.8226	19.5295	NaN	21.1372	NaN	NaN	NaN	NaN	1	2	4	0	4	0	0	0	0
CDIF630erm_01160	PotA	ABC-type transport system, spermidine/putrescine ATP-binding protein	CytoplasmicMembrane	Transport and binding proteins	Amino acids, peptides and amines	x	x			NaN	19.2014	19.464	24.8086	22.6671	24.2245	23.3801	23.9121	23.9887	0	2	6	10	9	7	7	9	10
CDIF630erm_01175	Cwp16	putative cell wall hydrolase/autolysin	CytoplasmicMembrane	Cell envelope	Biosynthesis and degradation of murein sacculus and peptidoglycan	x				22.6379	22.7753	23.0595	23.8239	22.258	NaN	22.7817	21.7113	21.6084	7	6	6	4	6	1	4	4	4
CDIF630erm_01186	PepT1	peptidase T	Cytoplasmic	Protein fate	Degradation of proteins, peptides, and glycopeptides					23.9425	22.2212	22.3974	NaN	21.028	NaN	20.6356	NaN	NaN	9	4	7	0	6	0	2	0	0
CDIF630erm_01187	Cwp18	putative cell wall-binding protein	Cellwall	Cell envelope	Other	x	x			16.5742	18.7005	20.3718	25.6637	25.6069	22.6504	23.1707	25.5087	25.6719	2	4	7	12	17	9	7	15	13
CDIF630erm_01188	CDIF630erm_01188	putative phosphodiesterase	Cytoplasmic	Unknown function	Enzymes of unknown specificity	x				20.0737	20.4204	20.8165	NaN	19.8767	NaN	NaN	NaN	NaN	5	5	3	1	4	1	1	2	1
CDIF630erm_01189	PpnK	NAD+ kinase	Cytoplasmic	Energy metabolism	Sugars					NaN	20.7481	21.7946	NaN	19.6518	NaN	NaN	NaN	NaN	1	2	2	0	2	0	0	0	0
CDIF630erm_01194	Bcd	butyryl-CoA dehydrogenase, catalytic subunit	Cytoplasmic	Fatty acid and phospholipid metabolis	Degradation	x				23.8956	24.9498	26.0449	NaN	23.9992	21.8691	21.945	22.7845	20.864	8	12	15	1	10	4	3	4	3
CDIF630erm_01195	EtfB3	butyryl-CoA dehydrogenase, electron transfer flavoprotein beta subunit	Cytoplasmic	Energy metabolism	Electron transport	x	x			25.97	25.6102	24.7735	19.2235	22.4327	19.8313	21.3826	21.3601	21.103	14	14	11	2	10	2	3	2	3
CDIF630erm_01196	EtfA3	butyryl-CoA dehydrogenase, electron transfer flavoprotein alpha subunit	Cytoplasmic	Energy metabolism	Electron transport	x				25.2691	24.3075	23.9292	NaN	23.2763	20.4455	22.0708	NaN	NaN	16	15	13	0	8	2	2	1	1
CDIF630erm_01197	Crt2	short-chain-enoyl-CoA hydratase	Cytoplasmic	Fatty acid and phospholipid metabolis	Biosynthesis	x	x			22.5067	23.0711	23.6447	20.6767	21.0301	20.4217	22.5389	19.2582	19.4195	9	9	9	4	7	2	4	3	3
CDIF630erm_01198	Hbd	3-hydroxybutyryl-CoA dehydrogenase	Unknown	Fatty acid and phospholipid metabolis	Degradation		x	x		24.2443	24.7664	24.8671	21.3897	21.202	NaN	20.2871	20.7208	20.2412	7	6	8	5	4	1	2	2	3
CDIF630erm_01199	ThlA1	acetyl-CoA C-acetyltransferase	Cytoplasmic	Fatty acid and phospholipid metabolism	Other	x	x			26.7003	26.9969	26.661	25.8161	25.6694	25.155	25.8039	24.7339	24.7877	16	17	15	12	12	10	8	8	5
CDIF630erm_01201	CDIF630erm_01201	nucleoid-associated protein, NdpA-like	Unknown	Unknown function	Unknown function					20.2676	NaN	NaN	24.7225	20.914	23.5713	24.3902	24.1399	24.3555	5	0	0	10	6	10	8	8	10
CDIF630erm_01207	CcpA	transcriptional regulator, LacI family	Cytoplasmic	Regulatory functions	DNA interactions					21.2819	22.7388	22.9315	NaN	22.0147	NaN	NaN	NaN	NaN	8	10	10	0	4	1	1	0	0
CDIF630erm_01216	ApeA	aminopeptidase ApeA	Cytoplasmic	Protein fate	Degradation of proteins, peptides, and glycopeptides	x				22.7834	23.5105	24.1869	NaN	22.0348	NaN	21.6963	NaN	NaN	8	9	12	0	5	0	3	0	0
CDIF630erm_01219	CDIF630erm_01219	membrane complex biogenesis protein, btpa family	Cytoplasmic	Unknown function	Unknown function					19.4585	19.6168	19.9468	NaN	19.1818	NaN	NaN	NaN	NaN	2	2	3	0	2	0	1	1	0
CDIF630erm_01224	CDIF630erm_01224	putative lipoprotein	Unknown	Unknown function	Unknown function					20.1995	20.2747	19.6861	20.1283	20.9917	21.9799	21.153	21.6564	20.6465	2	4	4	3	2	2	2	5	4
CDIF630erm_01230	CDIF630erm_01230	putative peptidase, M20D family	Cytoplasmic	Protein fate	Degradation of proteins, peptides, and glycopeptides	x				24.4811	24.2284	24.2777	NaN	23.5216	NaN	NaN	NaN	NaN	10	8	11	0	6	0	1	1	1
CDIF630erm_01266	CDIF630erm_01266	transcriptional regulator, RmlC-type	Cytoplasmic	Regulatory functions	DNA interactions				x	19.6579	21.5061	21.973	NaN	20.9016	NaN	NaN	NaN	NaN	3	6	8	0	6	0	0	0	0
CDIF630erm_01270	CDIF630erm_01270	putative nitroreductase-like oxidoreductase	Cytoplasmic	Central intermediary metabolism	Nitrogen metabolism	x	x			24.2914	25.226	24.8042	23.5701	24.1069	21.796	22.6588	24.9717	22.2044	7	12	11	3	6	2	2	3	3
CDIF630erm_01275	PolA	DNA polymerase I (POLI)	Cytoplasmic	DNA metabolism	DNA replication, recombination, and repair		x			23.144	23.0465	23.5162	20.7313	21.4803	19.9052	20.4399	20.2255	20.7516	10	17	17	3	7	4	3	4	2
CDIF630erm_01278	CDIF630erm_01278	putative solute-binding lipoprotein	Cellwall	Transport and binding proteins	Amino acids, peptides and amines					17.7346	NaN	NaN	22.6833	21.1012	22.6309	21.8688	23.9128	25.0823	2	0	0	9	8	6	5	14	13
CDIF630erm_01282	CDIF630erm_01282	putative SH3-domain protein	Cellwall	Cell envelope	Biosynthesis and degradation of murein sacculus and peptidoglycan	x	x			21.2578	24.4192	24.8746	26.7786	26.3579	25.0775	27.08	26.0404	25.5168	6	11	11	12	12	9	10	11	8
CDIF630erm_01284	RnfC	electron transport complex protein	Cytoplasmic	Energy metabolism	Electron transport		x			24.1487	24.7126	25.1522	27.4367	26.2336	27.2865	27.793	27.7404	27.3043	9	13	10	13	13	10	12	9	14
CDIF630erm_01286	RnfG	electron transport complex protein	Unknown	Energy metabolism	Electron transport		x			22.4947	22.6714	22.1361	25.7577	24.4525	26.4994	26.0203	26.1465	25.4963	5	6	7	6	7	5	6	6	8
CDIF630erm_01289	RnfB	electron transport complex protein	Cytoplasmic	Energy metabolism	Electron transport	x	x			21.3999	22.801	22.3886	23.0942	23.3244	22.8359	23.0137	24.3782	23.6548	2	4	4	4	5	3	3	6	5
CDIF630erm_01290	CDIF630erm_01290	putative maf-like protein	Cytoplasmic	Cellular processes	Cell division				x	19.5709	20.7608	20.5964	NaN	19.9332	NaN	NaN	NaN	NaN	4	3	3	0	4	0	0	0	0
CDIF630erm_01292	MreB2	rod shape-determining protein MreB	Cytoplasmic	Cell envelope	Biosynthesis and degradation of murein sacculus and peptidoglycan	x	x			25.9087	26.5618	27.1866	24.2088	24.9993	24.4244	22.9468	26.0371	24.7087	17	20	19	6	17	5	4	13	6
CDIF630erm_01293	MreC	rod shape-determining protein MreC	Unknown	Cell envelope	Biosynthesis and degradation of murein sacculus and peptidoglycan	x				20.2424	21.7782	22.4284	23.3067	21.8597	23.4033	22.3493	23.3419	24.4271	2	6	7	7	5	5	5	7	7
CDIF630erm_01295	CDIF630erm_01295	putative penicillin-binding protein with a N-terminal TonB-box	CytoplasmicMembrane	Cell envelope	Biosynthesis and degradation of murein sacculus and peptidoglycan	x	x			22.2556	21.0736	19.6899	26.568	24.7459	26.8124	26.3727	26.1545	26.4526	6	8	3	19	18	19	17	26	24
CDIF630erm_01296	MinC	cell division regulator (septum placement)	Cytoplasmic	Cellular processes	Cell division	x				19.2179	20.4036	19.5746	NaN	NaN	NaN	NaN	NaN	NaN	2	2	2	1	1	0	1	0	0
CDIF630erm_01297	MinD	septum site-determining protein MinD (cell division inhibitor MinD)	CytoplasmicMembrane	Cellular processes	Cell division	x				21.0193	22.0406	22.574	20.2715	21.8576	21.0857	NaN	21.2403	NaN	5	5	5	2	4	2	1	3	1
CDIF630erm_01298	MinE	cell division topological specificity factor	Cytoplasmic	Cellular processes	Cell division					22.3982	20.2646	20.8432	NaN	20.4516	NaN	NaN	NaN	NaN	1	2	2	1	2	0	0	0	0
CDIF630erm_01300	MgsA	methylglyoxal synthase	Cytoplasmic	Energy metabolism	Other					20.305	20.3755	NaN	NaN	NaN	NaN	NaN	NaN	NaN	2	2	2	2	3	1	1	1	1
CDIF630erm_01303	CDIF630erm_01303	uncharacterized protein, transglutaminase-like	Unknown	Unknown function	Unknown function					21.4459	20.7863	21.2434	20.3994	21.3632	20.2551	21.9242	21.1729	20.7779	5	4	6	3	6	2	6	4	3
CDIF630erm_01304	FprA	flavo-diiron protein FprA	Cytoplasmic	Energy metabolism	Anaerobic	x				26.3817	24.7943	25.4983	22.0375	25.1447	20.0378	NaN	20.5161	20.9739	13	13	14	4	10	2	1	3	3
CDIF630erm_01305	CDIF630erm_01305	putative radical SAM-superfamily protein	Cytoplasmic	Unknown function	Enzymes of unknown specificity					25.1008	24.4937	24.3594	20.7485	23.779	NaN	NaN	19.4827	20.9915	15	19	15	2	8	2	0	2	2
CDIF630erm_01308	RplU	50S ribosomal protein L21	Unknown	Protein synthesis	Ribosomal proteins: synthesis and modification		x			28.3879	28.4417	28.7457	26.1752	26.8876	25.5527	26.4394	25.9268	26.7804	5	3	2	2	2	2	2	3	2
CDIF630erm_01310	RpmA	50S ribosomal protein L27	Cytoplasmic	Protein synthesis	Ribosomal proteins: synthesis and modification					24.8531	24.9064	26.1865	NaN	25.1185	NaN	NaN	24.202	23.8839	4	2	3	0	3	0	0	2	2
CDIF630erm_01311	ObgE	Spo0B-associated GTP-binding protein	Cytoplasmic	Protein synthesis	Other	x				23.9997	22.5559	21.9739	NaN	21.8286	NaN	NaN	NaN	NaN	18	14	10	0	6	1	0	0	1
CDIF630erm_01312	CDIF630erm_01312	rna-binding protein, yhby family	Cytoplasmic	Protein synthesis	Ribosomal proteins: synthesis and modification					21.7547	NaN	NaN	21.7244	19.1749	NaN	NaN	20.9407	NaN	3	1	0	2	3	1	0	2	1
CDIF630erm_01315	CDIF630erm_01315	putative integrase/recombinase	Cytoplasmic	DNA metabolism	DNA replication, recombination, and repair				x	NaN	NaN	NaN	23.6858	NaN	NaN	20.9232	21.5009	21.4955	0	0	0	5	0	0	2	2	5
CDIF630erm_01323	AckA	acetate kinase	Cytoplasmic	Energy metabolism	Fermentation					28.5024	28.04	27.9066	25.4886	27.9708	26.0779	26.7268	26.2184	25.3533	24	24	26	8	22	8	12	12	12
CDIF630erm_01326	FapR	fatty acid and phospholipid biosynthesis regulator	Cytoplasmic	Regulatory functions	DNA interactions					18.2947	NaN	19.0176	22.6794	19.1952	20.5059	19.982	22.1982	21.5672	2	1	2	4	2	2	3	4	4
CDIF630erm_01327	PlsX	phosphate acyltransferase	Cytoplasmic	Fatty acid and phospholipid metabolism	Biosynthesis	x				19.1883	20.7756	20.6375	NaN	19.1631	NaN	NaN	NaN	NaN	4	6	4	1	3	1	0	0	1
CDIF630erm_01328	FabH	beta-ketoacyl-[acyl-carrier-protein] synthase 3	Cytoplasmic	Fatty acid and phospholipid metabolism	Biosynthesis	x	x			24.2663	25.7022	25.7923	20.8573	23.3795	20.0491	NaN	20.3135	19.7359	9	12	11	4	8	2	1	3	3
CDIF630erm_01329	FabK	enoyl-[acyl-carrier-protein] reductase (NADH)	Cytoplasmic	Fatty acid and phospholipid metabolis	Biosynthesis	x	x			25.1707	24.2334	23.7449	23.0447	23.7176	20.4563	NaN	21.1872	23.3578	8	10	7	4	7	3	1	4	5
CDIF630erm_01330	FabD	malonyl CoA-acyl carrier protein transacylase	Cytoplasmic	Fatty acid and phospholipid metabolism	Biosynthesis	x				22.2529	23.2557	22.763	NaN	21.6482	NaN	NaN	18.9882	19.9809	6	9	8	0	6	0	1	4	2
CDIF630erm_01331	FabG1	3-oxoacyl-[acyl-carrier-protein] reductase	Cytoplasmic	Fatty acid and phospholipid metabolism	Biosynthesis	x	x			25.8608	24.0416	23.5863	22.9158	23.4706	21.6614	23.6808	23.2933	23.75	10	10	9	6	7	3	3	5	7
CDIF630erm_01332	AcpP2	acyl carrier protein (ACP)	Cytoplasmic	Fatty acid and phospholipid metabolism	Biosynthesis					23.542	25.5104	26.3389	22.4382	24.6238	NaN	NaN	NaN	NaN	3	4	2	2	2	1	1	1	1
CDIF630erm_01333	FabF	3-oxoacyl-[acyl-carrier-protein] synthase 2	CytoplasmicMembrane	Fatty acid and phospholipid metabolism	Biosynthesis		x			26.7841	27.1131	27.0061	19.1133	25.5467	NaN	20.9955	20.0726	19.1302	14	16	13	2	9	1	2	3	2
CDIF630erm_01339	CDIF630erm_01339	putative N-acetyltransferase	Cytoplasmic	Protein fate	Protein modification and repair	x				23.2918	22.6202	22.7777	23.1177	23.0859	NaN	23.7971	22.8184	23.8857	3	4	4	2	3	1	2	2	2
CDIF630erm_01349	CDIF630erm_01349	alkaline shock protein	Unknown	Unknown function	Unknown function					23.7468	23.7004	23.5188	22.6675	24.8379	23.5889	23.4524	23.9094	22.9072	4	4	3	2	4	2	2	4	2
CDIF630erm_01350	NusB	N utilization substance protein B	Cytoplasmic	Transcription	Transcription factors		x	x		20.423	20.185	20.7946	21.8433	22.4864	NaN	20.9783	19.9862	21.2864	2	2	4	3	5	1	3	2	3
CDIF630erm_01354	IspA	geranylgeranyl pyrophosphate synthase	Cytoplasmic	Biosynthesis of cofactors, prosthetic	Other	x				21.6586	21.4228	21.6917	NaN	20.1845	NaN	NaN	18.2514	NaN	6	5	4	1	3	0	0	2	1
CDIF630erm_01358	RecN	DNA repair protein RecN	Cytoplasmic	DNA metabolism	DNA replication, recombination, and repair					NaN	20.1188	19.5058	NaN	NaN	NaN	NaN	NaN	NaN	0	4	4	0	1	0	0	0	0
CDIF630erm_01363	Spo0A	stage 0 sporulation protein A	Cytoplasmic	n.d.	n.d.		x			23.5705	24.1401	23.7409	21.4475	21.8968	NaN	20.4809	18.9693	21.5058	10	14	11	4	11	0	4	2	4
CDIF630erm_01364	CDIF630erm_01364	putative thiamine diphosphokinase	Cytoplasmic	Unknown function	Unknown function	x				NaN	NaN	NaN	NaN	NaN	NaN	NaN	21.1957	20.6647	0	0	0	1	0	0	0	2	2
CDIF630erm_01365	CDIF630erm_01365	hypothetical protein	Unknown	Unknown function	Unknown function		x			18.8966	19.1376	19.3355	22.4669	21.645	19.7537	20.9589	24.2663	22.6885	2	3	3	6	7	2	4	10	7
CDIF630erm_01368	CDIF630erm_01368	hypothetical protein	Unknown	Unknown function	Unknown function					19.8603	20.7668	21.1828	NaN	20.2997	NaN	NaN	NaN	NaN	5	5	5	0	5	0	1	0	0
CDIF630erm_01369	NudF	ADP-ribose pyrophosphatase	Cytoplasmic	DNA metabolism	DNA replication, recombination, and repair					NaN	21.3505	22.5063	NaN	21.0531	NaN	NaN	NaN	NaN	0	2	3	0	3	0	1	0	0
CDIF630erm_01372	DeoB	phosphopentomutase	Cytoplasmic	Purines, pyrimidines, nucleosides, and nucleotides	Other					21.0469	20.7438	19.9801	NaN	19.3066	NaN	NaN	NaN	NaN	8	7	9	0	3	0	1	0	1
CDIF630erm_01373	PupG	purine-nucleoside phosphorylase	Cytoplasmic	Purines, pyrimidines, nucleosides, and nucleotides	Salvage of nucleosides and nucleotides	x				22.9793	25.0681	24.6955	19.549	22.3462	NaN	21.053	NaN	19.9521	6	10	8	2	8	1	3	1	2
CDIF630erm_01376	CDIF630erm_01376	putative O-methyltransferase	Cytoplasmic	Unknown function	Unknown function				x	18.5598	19.1898	20.2045	NaN	19.2574	NaN	NaN	NaN	NaN	2	3	2	1	2	0	0	0	0
CDIF630erm_01377	YrrO	putative protease YrrO	Cytoplasmic	Energy metabolism	Amino acids and amines					22.5879	23.6413	24.7075	NaN	22.7682	NaN	19.8356	NaN	18.8964	12	15	11	0	9	0	2	1	2
CDIF630erm_01381	CDIF630erm_01381	putative lipoprotein	Unknown	Transport and binding proteins	Unknown substrate	x				NaN	NaN	NaN	NaN	NaN	NaN	NaN	22.6909	21.0249	1	1	0	1	0	1	0	7	4
CDIF630erm_01398	Efp	elongation factor P (EF-p)	Cytoplasmic	Protein synthesis	Translation factors		x			27.747	26.0772	25.5273	23.8596	25.4905	24.1781	24.347	24.0305	25.1252	16	15	13	7	13	4	9	8	9
CDIF630erm_01402	Smc	structural maintenance chromosome protein SMC	Cytoplasmic	DNA metabolism	Chromosome-associated proteins					23.8095	23.3484	24.6852	20.2553	24.0384	21.9417	22.5729	23.1852	22.0941	11	13	19	2	12	5	2	4	7
CDIF630erm_01403	FtsY	signal recognition particle receptor	CytoplasmicMembrane	Protein fate	Protein and peptide secretion and trafficking	x	x			24.7736	22.4115	21.7212	NaN	21.3007	21.0668	NaN	20.1661	21.8353	10	8	7	1	7	2	0	3	2
CDIF630erm_01405	Ffh	signal recognition particle protein	CytoplasmicMembrane	Protein fate	Protein and peptide secretion and trafficking			x		24.1118	21.0875	19.7509	21.4294	21.1848	NaN	NaN	22.5626	22.4588	5	3	4	1	5	1	1	3	1
CDIF630erm_01406	RpsP	30S ribosomal protein S16	Cytoplasmic	Protein synthesis	Ribosomal proteins: synthesis and modification					24.9686	22.9628	21.4917	NaN	21.9645	NaN	NaN	22.0246	21.7714	6	5	3	1	3	0	0	3	2
CDIF630erm_01408	RimM	16S rRNA processing protein RimM	Cytoplasmic	Transcription	RNA processing					21.3132	NaN	20.6053	NaN	23.2905	NaN	NaN	NaN	NaN	5	1	2	1	4	1	1	1	1
CDIF630erm_01410	RplS	50S ribosomal protein L19	Cytoplasmic	Protein synthesis	Ribosomal proteins: synthesis and modification					26.9946	28.2267	27.4272	27.7133	27.5989	26.8962	27.3227	27.0968	27.2487	10	10	9	6	9	5	6	7	7
CDIF630erm_01414	NrdZ	vitamin B12-dependent ribonucleoside-diphosphate reductase	Cytoplasmic	Purines, pyrimidines, nucleosides, and nucleotides	2'-Deoxyribonucleotide metabolism					20.1827	20.7422	20.8701	NaN	21.1538	NaN	NaN	NaN	NaN	2	4	5	0	3	0	0	1	1
CDIF630erm_01416	CDIF630erm_01416	putative (S)-2-hydroxy-acid oxidase	Cytoplasmic	Energy metabolism	Electron transport	x				22.8435	23.9239	23.4859	18.8984	22.361	NaN	20.6066	20.0282	NaN	8	8	8	2	7	0	3	2	1
CDIF630erm_01428	CodY	transcriptional regulator, GTP-sensing pleiotropic repressor	Cytoplasmic	Regulatory functions	DNA interactions	x				25.0543	25.629	25.2512	19.2786	25.1333	23.289	22.4837	23.8035	22.2534	15	19	14	3	15	7	6	8	5
CDIF630erm_01432	IscS2	cysteine desulfurase	Cytoplasmic	Biosynthesis of cofactors, prosthetic	Thiamine	x				26.9591	23.9387	25.7186	22.7593	25.4721	23.0177	20.9972	23.1372	23.101	16	12	15	3	13	2	3	6	5
CDIF630erm_01433	CDIF630erm_01433	fe-s iron-sulfur cluster assembly protein, nifu family	Unknown	Biosynthesis of cofactors, prosthetic groups, and carriers	Other	x	x			25.8092	24.7333	26.0189	23.647	24.1519	22.9485	NaN	22.7593	23.7567	9	7	8	4	8	2	1	4	6
CDIF630erm_01436	AlaS	alanine-tRNA synthetase	Cytoplasmic	Protein synthesis	tRNA aminoacylation	x				26.8708	27.2847	27.3857	25.6972	27.3504	26.0084	26.0091	25.7798	25.5218	29	35	38	12	29	16	15	13	15
CDIF630erm_01441	Fur	transcriptional regulator, Fur family	Cytoplasmic	Regulatory functions	DNA interactions					23.0322	23.2318	23.8282	NaN	22.5271	NaN	NaN	NaN	NaN	6	9	7	1	6	1	1	1	0
CDIF630erm_01443	CDIF630erm_01443	ribonuclease J family protein	Cytoplasmic	Unknown function	Unknown function	x				24.4604	25.647	25.3588	23.1352	25.3769	24.7468	25.0689	23.767	23.3542	16	19	17	4	13	7	9	6	7
CDIF630erm_01454	PepA	cytosol aminopeptidase	Cytoplasmic	Protein fate	Degradation of proteins, peptides, and glycopeptides		x			22.0102	22.8986	22.6166	20.4463	20.3731	20.0563	NaN	19.2881	NaN	5	7	7	2	2	2	1	3	0
CDIF630erm_01458	NpdA	NAD-dependent deacetylase, Sir2 family	Unknown	Protein fate	Protein modification and repair	x			x	19.577	19.9366	20.3871	NaN	19.3004	NaN	NaN	NaN	NaN	2	4	3	0	3	0	0	0	0
CDIF630erm_01459	Acd	mannosyl-glycoprotein endo-beta-N-acetylglucosamidase	Extracellular	Protein fate	Degradation of proteins, peptides, and glycopeptides		x			19.4859	21.2733	21.4733	23.9034	22.6326	22.512	23.6797	21.9639	20.9902	5	10	13	4	10	3	3	4	3
CDIF630erm_01461	RimP	ribosome maturation factor rimp	Cytoplasmic	Unknown function	Unknown function					24.7442	25.1618	24.6628	NaN	24.8495	NaN	NaN	NaN	NaN	5	5	5	0	3	0	0	1	1
CDIF630erm_01462	NusA	transcription elongation protein	Cytoplasmic	Transcription	Transcription factors					24.7842	22.4977	22.4756	24.6846	23.4992	25.1361	25.1871	25.5352	24.2917	17	14	14	11	11	4	11	9	8
CDIF630erm_01465	InfB	translation initiation factor IF-2	Cytoplasmic	Protein synthesis	Translation factors		x			27.5952	27.9223	26.502	23.4468	24.993	23.407	23.3692	23.0236	24.7032	23	26	24	6	14	4	6	10	9
CDIF630erm_01467	CDIF630erm_01467	putative rna-binding protein	Unknown	Transport and binding proteins	Nucleosides, purines and pyrimidines					NaN	20.2261	20.6722	NaN	18.264	NaN	NaN	NaN	NaN	1	3	4	0	3	0	0	0	0
CDIF630erm_01469	CDIF630erm_01469	putative rna-binding protein	Cytoplasmic	n.d.	n.d.	x				15.8352	NaN	19.8616	NaN	NaN	NaN	NaN	NaN	NaN	2	1	3	0	1	0	0	0	0
CDIF630erm_01471	RibF	riboflavin biosynthesis protein	Cytoplasmic	Unknown function	Unknown function					20.4085	19.8039	20.8079	NaN	19.4033	NaN	NaN	NaN	NaN	3	4	7	0	3	0	0	1	0
CDIF630erm_01472	RpsO	30S ribosomal protein S15	Cytoplasmic	Protein synthesis	Ribosomal proteins: synthesis and modification	x				24.1084	22.4643	22.2825	21.9925	23.1152	20.7321	22.1438	23.9211	24.6699	7	6	3	2	5	2	2	3	4
CDIF630erm_01474	Pnp	polyribonucleotide nucleotidyltransferase	Cytoplasmic	Transcription	Degradation of RNA			x		27.8937	29.0163	29.3751	27.3867	28.1278	27.6154	26.0316	26.7922	27.3573	27	42	37	13	28	15	10	13	16
CDIF630erm_01478	DapG	aspartokinase	Cytoplasmic	Amino acid biosynthesis	Aspartate family		x			23.6493	24.1593	24.8564	21.9899	22.7281	22.0572	21.5059	22.9045	20.9701	7	10	9	3	8	3	2	2	4
CDIF630erm_01480	FtsK	DNA FtsK/SpoIIIE translocase	CytoplasmicMembrane	DNA metabolism	DNA replication, recombination, and repair	x				21.2754	21.3947	NaN	21.9587	19.9195	21.6856	NaN	21.8937	22.6562	6	2	2	3	4	2	0	2	3
CDIF630erm_01484	RecA	protein RecA (Recombinase a)	Cytoplasmic	DNA metabolism	DNA replication, recombination, and repair	x				22.7854	24.3459	24.4037	NaN	23.353	NaN	NaN	NaN	23.1765	8	8	7	0	6	1	0	1	5
CDIF630erm_01485	CDIF630erm_01485	RNase Y	Cytoplasmic	Transcription	Degradation of RNA					21.17	22.4796	22.6588	25.1754	22.2871	25.0469	24.1956	25.6477	25.3319	5	5	4	12	8	13	7	13	14
CDIF630erm_01487	SpsB3	signal peptidase IB	Cellwall	Protein fate	Protein and peptide secretion and trafficking	x				NaN	NaN	21.8203	22.0142	21.2419	23.5559	NaN	23.2574	22.9465	1	0	2	3	4	4	1	4	4
CDIF630erm_01489	CDIF630erm_01489	putative phage tyrosine recombinase	Cytoplasmic	DNA metabolism	DNA replication, recombination, and repair					19.7174	NaN	NaN	25.9566	21.7107	23.364	22.5967	25.4585	24.7579	2	0	1	12	7	7	6	11	7
CDIF630erm_01490	PurB	adenylosuccinate lyase	Cytoplasmic	Purines, pyrimidines, nucleosides, and nucleotides	Purine ribonucleotide biosynthesis					24.1208	22.4086	22.3206	19.3895	22.1909	NaN	NaN	NaN	NaN	6	5	4	2	2	0	0	1	1
CDIF630erm_01491	CDIF630erm_01491	transcriptional regulator, MarR family	Cytoplasmic	Regulatory functions	DNA interactions					NaN	NaN	21.8755	NaN	22.3275	NaN	NaN	22.9719	21.8621	1	1	2	1	4	0	0	2	3
CDIF630erm_01495	CDIF630erm_01495	putative alanine aminotransferase	Cytoplasmic	Amino acid biosynthesis	Aspartate family	x				25.8709	24.6729	24.8646	19.6303	25.2797	NaN	21.7928	21.4015	20.5197	13	13	13	2	12	1	8	5	4
CDIF630erm_01499	GlnA	glutamine synthetase	Cytoplasmic	Amino acid biosynthesis	Glutamate family	x				25.8171	24.9021	24.6858	NaN	24.3971	21.6813	23.6132	22.4189	22.249	20	19	15	0	11	4	4	8	6
CDIF630erm_01509	CDIF630erm_01509	putative pyridoxine kinase	Unknown	Biosynthesis of cofactors, prosthetic	Pyridoxine					21.2223	21.5032	21.0581	NaN	20.5099	NaN	NaN	NaN	NaN	2	4	3	0	2	0	1	1	2
CDIF630erm_01511	CspB	cold shock protein CspB	Cytoplasmic	Cellular processes	Adaptations to atypical conditions	x				27.6462	27.3224	27.6382	27.0425	27.9185	25.7526	27.0522	24.7614	25.4477	3	4	3	3	3	3	3	3	3
CDIF630erm_01512	CDIF630erm_01512	putative CBS domain-containing protein	Unknown	Unknown function	Unknown function	x				22.0162	21.1021	21.3541	NaN	21.8069	NaN	NaN	NaN	NaN	6	5	4	1	4	1	1	1	1
CDIF630erm_01513	CDIF630erm_01513	putative peptidyl-prolyl isomerase	Cytoplasmic	Protein fate	Protein folding and stabilization	x				29.6232	26.7327	26.1157	21.1262	26.2144	22.9811	24.0372	24.9529	24.1809	31	28	21	8	23	8	10	9	11
CDIF630erm_01535	CDIF630erm_01535	putative membrane protein	Unknown	Unknown function	Unknown function		x			20.9159	19.1762	NaN	24.58	23.3746	23.1576	NaN	25.57	24.8102	3	3	0	8	7	4	1	11	7
CDIF630erm_01543	CDIF630erm_01543	transcriptional regulator, GntR family	Unknown	Regulatory functions	DNA interactions					22.7135	23.0484	23.2348	25.1507	24.4677	22.5294	25.3949	23.697	24.0531	8	10	12	7	11	2	7	7	9
CDIF630erm_01544	CDIF630erm_01544	putative lamB-like protein, UPF0271 family	Cytoplasmic	Cellular processes	Other					22.1724	22.5093	22.2233	NaN	21.2123	NaN	NaN	NaN	NaN	3	5	4	0	3	0	0	0	1
CDIF630erm_01546	KipI	kinase A inhibitor	Cytoplasmic	Unknown function	Unknown function					20.203	17.4598	NaN	NaN	NaN	NaN	NaN	NaN	NaN	3	3	1	0	2	0	0	0	0
CDIF630erm_01552	CDIF630erm_01552	putative endoribonuclease	Cytoplasmic	Protein synthesis	Translation factors					19.49	24.1166	24.2091	NaN	24.0291	NaN	NaN	NaN	NaN	3	5	4	1	3	0	1	1	1
CDIF630erm_01554	CDIF630erm_01554	putative NAD(P)-binding oxidoreductase, GFO/IDH/MOCA family	Cytoplasmic	Energy metabolism	Other				x	18.0179	18.5345	19.0627	NaN	NaN	NaN	NaN	NaN	NaN	2	3	2	0	0	0	0	0	0
CDIF630erm_01557	CDIF630erm_01557	TsaA-like protein	Cytoplasmic	Unknown function	Unknown function	x				19.9792	19.5969	20.0979	NaN	NaN	NaN	NaN	NaN	NaN	2	2	3	1	1	0	0	1	0
CDIF630erm_01560	CDIF630erm_01560	hypothetical protein	Unknown	Unknown function	Unknown function		x			19.8487	19.6096	19.8193	NaN	20.102	19.8977	19.5777	19.6231	20.3359	5	4	4	1	4	2	3	3	2
CDIF630erm_01561	CDIF630erm_01561	putative nicotinamidase	Cytoplasmic	Central intermediary metabolism	Other					22.2974	21.8993	22.2795	NaN	21.7928	NaN	NaN	NaN	NaN	6	7	5	0	5	0	1	0	1
CDIF630erm_01566	CDIF630erm_01566	ABC-type transport system, ATP-binding protein	Cytoplasmic	Transport and binding proteins	Amino acids, peptides and amines	x				NaN	17.7564	18.4005	NaN	NaN	NaN	NaN	NaN	NaN	1	3	2	0	1	0	0	0	0
CDIF630erm_01569	Ddl	D-alanine-D-alanine ligase	Cytoplasmic	Cell envelope	Biosynthesis and degradation of murein sacculus and peptidoglycan	x				19.7895	20.1241	20.1995	NaN	20.008	NaN	NaN	NaN	NaN	2	2	3	0	2	0	0	1	0
CDIF630erm_01570	CDIF630erm_01570	putative competence-damage inducible protein, CinA family	Cytoplasmic	DNA metabolism	DNA replication, recombination, and repair	x				17.7692	19.7911	20.1869	NaN	18.9732	NaN	NaN	NaN	17.7481	3	4	3	0	2	1	0	0	2
CDIF630erm_01571	CDIF630erm_01571	putative hydrolase, HAD superfamily, subfamily IIB	Cytoplasmic	Unknown function	Enzymes of unknown specificity					18.7154	21.5784	21.9566	NaN	19.5773	20.4444	NaN	NaN	NaN	3	9	5	1	4	2	0	1	1
CDIF630erm_01578	CDIF630erm_01578	putative ATP-binding protein	Cytoplasmic	Unknown function	Unknown function	x				18.8722	19.2974	19.8941	NaN	19.4836	NaN	NaN	NaN	NaN	2	3	3	0	4	0	0	1	0
CDIF630erm_01600	CDIF630erm_01600	putative hydrolase	Unknown	Cellular processes	Toxin production and resistance	x				NaN	20.6386	20.5463	23.3885	19.5377	23.2753	21.5395	23.9982	23.5527	1	5	4	6	2	4	3	8	8
CDIF630erm_01602	CDIF630erm_01602	putative TPR repeat-containing protein	Cytoplasmic	Unknown function	Unknown function					NaN	NaN	NaN	NaN	NaN	NaN	NaN	23.2845	22.7649	0	1	1	1	1	1	1	3	3
CDIF630erm_01606	CDIF630erm_01606	putative MORN repeat-containing protein	Unknown	Hypothetical proteins	Domain					NaN	22.4669	22.2378	NaN	18.7781	NaN	NaN	NaN	NaN	1	9	9	0	5	0	0	0	0
CDIF630erm_01613	FolE	GTP cyclohydrolase 1	Cytoplasmic	Biosynthesis of cofactors, prosthetic groups, and carriers	Folic acid					20.3824	21.6885	21.41	NaN	21.4697	NaN	NaN	NaN	NaN	2	4	4	0	4	0	1	1	1
CDIF630erm_01621	CDIF630erm_01621	GTP cyclohydrolase 1 type 2	Cytoplasmic	Unknown function	Unknown function					19.5248	19.1064	20.1877	NaN	19.7848	NaN	18.9354	NaN	NaN	3	5	5	1	3	0	2	1	0
CDIF630erm_01623	CDIF630erm_01623	putative 5-nitroimidazole antibiotic resistance protein	Unknown	Energy metabolism	Electron transport					22.6633	25.3392	25.7929	21.0423	24.4818	19.4108	20.0198	20.7591	20.1818	9	11	9	3	8	2	2	3	2
CDIF630erm_01633	Cwp20	putative cell surface protein, putative penicillin-binding protein	Unknown	Cellular processes	Toxin production and resistance					21.1181	20.2276	20.9285	22.4667	20.807	20.3116	22.366	20.6684	22.0759	5	8	6	3	5	2	4	4	3
CDIF630erm_01635	CDIF630erm_01635	putative membrane protein	CytoplasmicMembrane	Hypothetical proteins	Domain	x				NaN	NaN	NaN	NaN	NaN	NaN	NaN	22.5518	22.3316	1	1	0	1	0	1	0	5	6
CDIF630erm_01638	Rbr2	reverse rubrerythrin	Cytoplasmic	Cellular processes	Adaptations to atypical conditions	x	x	x		27.121	26.8932	26.7296	24.9305	26.4247	25.471	24.7256	22.9565	22.6277	7	8	9	3	6	2	2	2	4
CDIF630erm_01645	CDIF630erm_01645	putative tryptophan RNA-binding attenuation protein	CytoplasmicMembrane	Unknown function	Unknown function		x			NaN	19.8065	19.4372	21.6058	NaN	23.418	21.1246	21.1564	22.1518	1	2	2	3	1	3	3	2	3
CDIF630erm_01648	SsuA1	ABC-type transport system, alkanesulfonates-family extracellular solute-binding protein	CytoplasmicMembrane	Transport and binding proteins	Other					21.3484	20.8874	19.6331	22.3977	20.3556	NaN	20.9326	21.7238	22.9964	4	4	5	4	5	1	4	5	3
CDIF630erm_01656	MetQ	ABC-type transport system, methionine-specific substrate-binding lipoprotein	CytoplasmicMembrane	Cell envelope	Other	x	x			20.9021	21.3848	20.3208	23.7291	23.113	24.3634	23.0517	24.8606	25.75	5	3	3	5	6	8	5	14	11
CDIF630erm_01659	CDIF630erm_01659	transcriptional regulator, HTH-type	Cytoplasmic	Regulatory functions	DNA interactions	x	x			19.9193	19.8071	23.0496	26.0947	23.2354	24.185	24.7592	25.3616	26.5698	2	2	3	3	3	3	3	3	5
CDIF630erm_01660	ProC1	pyrroline-5-carboxylate reductase	Cytoplasmic	Amino acid biosynthesis	Glutamate family					19.9679	21.9607	21.1938	NaN	20.3384	NaN	NaN	NaN	NaN	3	3	3	1	4	0	1	1	2
CDIF630erm_01661	CDIF630erm_01661	uncharacterized protein	Unknown	Hypothetical proteins	Domain	x	x	x		22.531	22.4896	22.7002	24.6196	24.3112	24.7236	25.4743	25.7066	26.0202	6	4	5	9	9	8	7	10	11
CDIF630erm_01662	CDIF630erm_01662	uncharacterized protein	Cytoplasmic	Unknown function	Unknown function					23.0168	21.8114	21.466	NaN	NaN	NaN	NaN	NaN	NaN	2	2	1	0	0	0	0	1	0
CDIF630erm_01667	DeoC	deoxyribose-phosphate aldolase	Cytoplasmic	Energy metabolism	Other	x				19.4929	21.4628	21.8321	NaN	20.2245	NaN	NaN	NaN	NaN	3	5	3	0	3	0	0	0	1
CDIF630erm_01675	CDIF630erm_01675	LUD-like protein	Unknown	Energy metabolism	Other	x				18.5364	18.982	NaN	NaN	18.7332	NaN	NaN	NaN	NaN	2	2	1	0	2	2	1	1	0
CDIF630erm_01689	TyrS	tyrosine-tRNA ligase	Cytoplasmic	Protein synthesis	tRNA aminoacylation	x		x		25.5682	21.4904	22.9178	22.4365	24.8409	23.3031	18.8664	21.4783	21.0748	26	12	17	12	17	7	4	6	4
CDIF630erm_01690	PgdA1	putative peptidoglycan-N-acetylglucosamine deacetylase	Extracellular	Energy metabolism	Sugars					NaN	NaN	NaN	NaN	NaN	NaN	NaN	23.1103	22.078	0	1	1	1	1	2	1	2	3
CDIF630erm_01692	Rbr3	reverse rubrerythrin	Cytoplasmic	Cellular processes	Adaptations to atypical conditions	x	x			26.7862	27.7643	25.8202	24.0613	24.5516	21.7595	22.0621	21.3004	23.0072	5	9	9	3	6	2	2	4	2
CDIF630erm_01694	PyrC	dihydroorotase	Cytoplasmic	Purines, pyrimidines, nucleosides, and nucleotides	Pyrimidine ribonucleotide biosynthesis	x			x	19.7264	19.6794	19.7228	NaN	18.8744	NaN	NaN	NaN	NaN	4	2	2	0	2	0	0	0	0
CDIF630erm_01695	CDIF630erm_01695	ABC-type transport system, permease	CytoplasmicMembrane	Transport and binding proteins	Amino acids, peptides and amines	x				NaN	NaN	NaN	NaN	NaN	NaN	NaN	23.7911	23.1362	0	1	0	1	1	2	1	3	3
CDIF630erm_01696	CDIF630erm_01696	ABC-type transport system, ATP-binding protein	CytoplasmicMembrane	Transport and binding proteins	Amino acids, peptides and amines		x			18.7918	20.4837	21.7086	23.9193	22.4887	23.574	21.5247	21.9932	24.3917	2	3	4	6	5	4	3	5	7
CDIF630erm_01697	CDIF630erm_01697	ABC-type transport system, permease	Unknown	Transport and binding proteins	Unknown substrate	x	x			21.3038	21.635	21.2172	25.7682	24.219	25.3195	24.7542	27.5729	26.8781	4	3	4	9	7	7	6	10	12
CDIF630erm_01702	CDIF630erm_01702	cephalosporin acylase	Extracellular	Biosynthesis of cofactors, prosthetic groups, and carriers	Glutathione and analogs					20.3844	NaN	17.4072	NaN	NaN	NaN	NaN	NaN	NaN	5	1	2	0	0	0	0	1	0
CDIF630erm_01703	SseA1	3-mercaptopyruvate sulfurtransferase	Cytoplasmic	Central intermediary metabolism	Sulfur metabolism	x				22.4116	22.6754	22.4543	NaN	20.037	NaN	NaN	NaN	NaN	6	8	6	0	4	0	0	1	0
CDIF630erm_01704	NfnA	NADH-dependent reduced ferredoxin:NADP+ oxidoreductase, subunit alpha	Cytoplasmic	Energy metabolism	Electron transport	x	x			25.5777	25.4293	24.7124	21.2596	23.2727	20.3984	22.0575	22.2999	20.8501	14	14	12	3	12	3	4	6	3
CDIF630erm_01705	NfnB	NADH-dependent reduced ferredoxin:NADP+ oxidoreductase, subunit beta	Cytoplasmic	Amino acid biosynthesis	Glutamate family	x	x			26.3302	26.1752	25.7662	22.1255	24.4285	21.6797	NaN	21.7748	22.1398	21	23	17	5	16	4	1	4	4
CDIF630erm_01710	CDIF630erm_01710	fic family protein	Cytoplasmic	Unknown function	Unknown function					19.6553	NaN	18.9007	NaN	NaN	NaN	NaN	NaN	NaN	3	1	3	0	2	0	0	1	0
CDIF630erm_01719	HisB	imidazoleglycerol-phosphate dehydratase	Cytoplasmic	Amino acid biosynthesis	Aromatic amino acid family					19.9799	20.7529	20.8421	NaN	20.2294	NaN	20.8951	NaN	NaN	2	3	2	1	3	0	2	1	0
CDIF630erm_01720	HisH	imidazole glycerol phosphate synthase subunit HisH	Cytoplasmic	Amino acid biosynthesis	Histidine family					19.3363	19.2355	18.8845	NaN	19.9813	NaN	NaN	19.3332	NaN	3	3	2	0	4	1	1	2	2
CDIF630erm_01721	HisA	1-(5-phosphoribosyl)-5-[(5- phosphoribosylamino)methylideneamino] imidazole-4-carboxamide isomerase	Cytoplasmic	Amino acid biosynthesis	Histidine family	x				20.3164	22.4317	23.0521	NaN	21.1219	NaN	NaN	NaN	NaN	5	7	6	0	4	1	1	1	0
CDIF630erm_01722	HisF	imidazole glycerol phosphate synthase subunit HisF	Cytoplasmic	Amino acid biosynthesis	Histidine family					NaN	19.3332	20.2996	NaN	18.1675	NaN	NaN	NaN	NaN	1	3	4	0	3	0	0	0	0
CDIF630erm_01723	HisI	bifunctional phosphoribosyl-AMP cyclohydrolase/phosphoribosyl-ATP pyrophosphatase	Cytoplasmic	Amino acid biosynthesis	Histidine family	x			x	18.2945	20.4713	19.2964	NaN	18.499	NaN	NaN	NaN	NaN	3	3	2	0	2	0	0	0	0
CDIF630erm_01746	PgcA1	phosphoglucomutase	Cytoplasmic	Energy metabolism	Sugars					19.4842	20.6912	21.0848	NaN	21.4944	19.8607	NaN	NaN	NaN	6	2	4	2	5	2	2	1	1
CDIF630erm_01767	CysK	cysteine synthase	Unknown	Amino acid biosynthesis	Serine family	x				24.4037	22.3795	24.3554	22.6323	20.4336	21.3796	20.3225	22.852	22.4046	15	11	15	6	9	7	5	6	12
CDIF630erm_01768	CysE	serine O-acetyltransferase	Cytoplasmic	Amino acid biosynthesis	Serine family					NaN	NaN	16.859	22.0257	19.2452	21.6703	19.9565	24.1999	25.5002	0	0	2	6	3	2	2	6	8
CDIF630erm_01777	CDIF630erm_01777	PTS system, lactose/cellobiose-family IIB component	Cytoplasmic	Signal transduction	PTS					NaN	21.7335	23.5776	NaN	23.3275	NaN	NaN	NaN	NaN	1	3	3	1	3	0	0	0	0
CDIF630erm_01790	CDIF630erm_01790	ABC-type transport system, ATP-binding protein	CytoplasmicMembrane	Transport and binding proteins	Cations and iron carrying compounds	x	x			NaN	18.8094	19.3697	23.8304	21.5674	NaN	22.8269	22.727	22.4664	0	4	3	4	5	1	5	5	6
CDIF630erm_01794	CDIF630erm_01794	ABC-type transport system, multidrug-family ATP-binding protein	CytoplasmicMembrane	Cellular processes	Toxin production and resistance		x			NaN	19.2399	19.1914	24.7466	22.5917	23.7886	22.8063	23.5926	24.986	1	4	3	7	5	4	5	6	9
CDIF630erm_01800	FprAnorR	NADH oxidase (H2O-forming)	Cytoplasmic	Energy metabolism	Electron transport	x	x	x		27.1641	26.5623	26.6252	24.4405	25.8548	25.309	23.2099	20.3036	22.4871	19	31	27	7	15	12	9	4	7
CDIF630erm_01811	TerD1	tellurium resistance protein terD	Cytoplasmic	Cellular processes	Toxin production and resistance	x				23.5187	26.0823	26.1373	24.3476	25.1696	23.0629	25.5732	24.402	23.9198	5	8	5	3	4	5	4	3	3
CDIF630erm_01812	TerD2	tellurium resistance protein terD	Cytoplasmic	Cellular processes	Toxin production and resistance					23.376	25.7211	25.2833	25.9034	25.055	25.6835	26.7304	25.6502	26.0794	5	5	5	4	5	4	5	4	5
CDIF630erm_01813	TerD3	tellurium resistance protein terD	Cytoplasmic	Cellular processes	Toxin production and resistance	x				21.2788	24.275	24.5386	21.0819	23.3616	NaN	20.7051	22.0753	24.5608	7	9	8	2	7	1	2	2	6
CDIF630erm_01814	CDIF630erm_01814	putative calcium-transporting ATPase	CytoplasmicMembrane	Transport and binding proteins	Cations and iron carrying compounds	x				24.8231	25.9351	25.3882	26.9577	25.5165	26.9672	26.2187	28.3558	28.1859	16	25	19	19	20	20	17	29	28
CDIF630erm_01816	CDIF630erm_01816	putative tellurite associated resistance protein	Cytoplasmic	Cellular processes	Toxin production and resistance	x	x			24.0964	22.4032	21.5512	25.5331	25.7718	26.5358	25.9168	26.8965	27.0911	14	8	9	15	22	14	18	24	25
CDIF630erm_01821	CDIF630erm_01821	transcriptional regulator, RmlC-type	Cytoplasmic	Regulatory functions	DNA interactions	x				NaN	19.3162	20.4262	20.9277	19.2368	NaN	NaN	19.1761	NaN	1	4	4	2	4	1	1	2	1
CDIF630erm_01829	CDIF630erm_01829	putative tellurium resistance protein	Cytoplasmic	Cellular processes	Toxin production and resistance	x				NaN	20.6877	20.3461	NaN	19.3934	NaN	20.8586	19.9232	20.2941	1	3	2	1	2	1	2	2	2
CDIF630erm_01830	CDIF630erm_01830	putative D-methionine-binding lipoprotein	CytoplasmicMembrane	Transport and binding proteins	Amino acids, peptides and amines					NaN	20.0009	NaN	22.0547	20.1879	20.5252	21.4047	24.3889	25.2252	1	2	1	2	2	3	2	5	5
CDIF630erm_01841	CDIF630erm_01841	uncharacterized protein	Unknown	Unknown function	Unknown function				x	19.1669	20.8664	21.5377	NaN	NaN	NaN	NaN	NaN	NaN	2	3	2	0	1	0	0	0	0
CDIF630erm_01844	GuaD	guanine deaminase	Unknown	Unknown function	Unknown function					20.7077	20.7448	22.4445	NaN	20.5777	NaN	NaN	NaN	NaN	4	9	11	0	4	0	0	1	1
CDIF630erm_01848	CDIF630erm_01848	transcriptional regulator, RmlC-type	Cytoplasmic	Regulatory functions	DNA interactions				x	17.3291	19.7187	20.1195	NaN	18.5644	NaN	NaN	NaN	NaN	3	3	3	0	2	0	0	0	0
CDIF630erm_01859	CDIF630erm_01859	putative NADPH-dependent FMN reductase	Unknown	Energy metabolism	Electron transport	x				21.2855	22.7981	23.0058	NaN	22.5664	NaN	NaN	NaN	NaN	4	5	5	0	6	0	1	1	1
CDIF630erm_01867	IunH	inosine/uridine-preferring nucleoside hydrolase	Cytoplasmic	Purines, pyrimidines, nucleosides, and nucleotides	Other	x				24.325	26.0561	26.3274	NaN	22.4288	NaN	19.9062	18.4169	NaN	9	14	10	1	8	1	2	1	1
CDIF630erm_01869	CDIF630erm_01869	putative radical SAM superfamily protein	Cytoplasmic	Unknown function	Enzymes of unknown specificity	x				23.0968	24.9665	24.4826	21.0213	24.0207	20.7392	NaN	21.6341	22.4915	4	5	4	2	4	2	1	2	3
CDIF630erm_01872	CDIF630erm_01872	putative lipoprotein	Unknown	Unknown function	Unknown function	x			x	18.2713	20.126	17.93	19.1274	NaN	NaN	NaN	NaN	NaN	3	3	2	2	1	1	0	0	0
CDIF630erm_01875	TrxA1	thioredoxin	Cytoplasmic	Energy metabolism	Electron transport					23.1682	25.244	26.1964	26.1524	25.9544	24.2509	25.7086	22.6222	NaN	4	5	4	3	5	3	4	3	1
CDIF630erm_01876	TrxB1	thioredoxin reductase	Cytoplasmic	Protein fate	Protein modification and repair					23.2598	23.6847	NaN	NaN	22.8793	NaN	NaN	NaN	NaN	4	10	0	0	4	1	0	0	0
CDIF630erm_01878	CDIF630erm_01878	putative dinitrogenase iron-molybdenum cofactor	Cytoplasmic	Unknown function	Unknown function					25.1785	24.7849	23.7051	NaN	23.0491	NaN	NaN	NaN	NaN	5	5	3	1	3	1	1	1	1
CDIF630erm_01879	CDIF630erm_01879	hypothetical protein	Unknown	Unknown function	Unknown function					NaN	NaN	19.7725	24.2837	23.4731	22.3081	NaN	24.6253	24.5289	1	0	3	4	6	4	0	5	3
CDIF630erm_01881	AlsT	sodium:alanine symporter	CytoplasmicMembrane	Transport and binding proteins	Amino acids, peptides and amines					22.9116	24.8608	23.9715	NaN	NaN	NaN	NaN	NaN	NaN	2	2	2	0	1	1	1	2	1
CDIF630erm_01896	CDIF630erm_01896	rela/spot domain protein	Cytoplasmic	Unknown function	Unknown function	x				18.535	19.3488	21.3167	NaN	18.4148	NaN	NaN	NaN	NaN	2	3	5	0	3	1	0	0	1
CDIF630erm_01899	CDIF630erm_01899	uncharacterized protein, UPF0145 family	CytoplasmicMembrane	Unknown function	Unknown function	x				NaN	NaN	NaN	24.4738	23.4897	23.7696	22.8665	26.8963	26.0592	0	1	1	3	3	3	4	6	6
CDIF630erm_01906	CDIF630erm_01906	uncharacterized protein	Cytoplasmic	Unknown function	Unknown function	x				22.8869	23.4424	23.0337	NaN	21.7396	NaN	20.7934	20.0895	NaN	8	9	10	0	7	1	3	3	0
CDIF630erm_01909	CDIF630erm_01909	putative hydantoinase (C-terminal component)	Cytoplasmic	n.d.	n.d.	x				24.11	21.5819	22.0011	20.1697	21.7204	20.6972	20.6724	20.047	21.3586	11	7	7	2	4	4	3	3	3
CDIF630erm_01917	CDIF630erm_01917	uncharacterized protein	CytoplasmicMembrane	Unknown function	Unknown function					NaN	18.9731	19.8064	NaN	NaN	NaN	NaN	NaN	NaN	1	2	4	1	2	0	0	0	0
CDIF630erm_01918	CDIF630erm_01918	hypothetical protein	Cytoplasmic	Unknown function	General					19.6323	20.1138	20.3575	NaN	NaN	NaN	NaN	NaN	NaN	2	2	2	0	1	0	0	1	0
CDIF630erm_01921	Mrp	iron-sulfur cluster carrier protein	Unknown	DNA metabolism	Chromosome-associated proteins	x				24.1191	24.3981	24.0725	NaN	23.0773	NaN	NaN	22.4014	NaN	8	8	7	1	6	0	0	2	1
CDIF630erm_01943	YjiM	putative 2-hydroxyacyl-CoA dehydratase	Cytoplasmic	Energy metabolism	Fermentation	x				26.2122	25.3762	26.1631	23.5819	26.5113	24.9436	23.2276	23.6559	23.8377	11	11	14	3	11	4	5	6	7
CDIF630erm_01944	YjiL	putative 2-hydroxyacyl-CoA dehydratase activase	CytoplasmicMembrane	Fatty acid and phospholipid metabolis	Biosynthesis	x				NaN	21.6252	23.5738	21.32	22.7638	NaN	21.1961	21.0256	23.555	1	3	7	3	8	1	2	3	6
CDIF630erm_01945	Cwp13	putative cell wall binding protein	Cellwall	Cell envelope	Other	x	x			NaN	22.2573	22.3897	26.4088	24.5221	25.6885	24.7759	25.7453	26.9155	2	7	11	15	16	15	12	18	16
CDIF630erm_01957	CDIF630erm_01957	putative phenazine biosynthesis PhzC/PhzF protein	Unknown	Cellular processes	Toxin production and resistance					NaN	18.3641	18.0644	NaN	17.1138	NaN	NaN	NaN	NaN	1	2	2	0	2	0	0	0	0
CDIF630erm_01961	CDIF630erm_01961	putative phenylalanyl-tRNA synthetase beta chain	Cytoplasmic	Protein synthesis	tRNA aminoacylation	x				22.5705	20.1264	21.211	NaN	21.959	NaN	20.3817	NaN	NaN	5	3	4	0	4	0	2	1	1
CDIF630erm_01965	CDIF630erm_01965	putative membrane protein	CytoplasmicMembrane	Unknown function	Unknown function					23.5966	25.1793	24.6199	23.4348	24.5457	23.4312	23.3061	26.289	25.3183	4	4	4	3	3	3	2	5	5
CDIF630erm_01966	CDIF630erm_01966	putative CoA-substrate dehydratase and activase	Cytoplasmic	Fatty acid and phospholipid metabolis	Biosynthesis					20.4777	21.2401	22.591	NaN	20.3571	NaN	NaN	19.7397	20.5563	6	8	8	1	2	1	1	2	3
CDIF630erm_01975	CDIF630erm_01975	putative arsenate reductase	Unknown	Regulatory functions	DNA interactions					23.3273	22.5441	22.7028	NaN	20.6357	NaN	NaN	21.4107	20.4947	9	6	4	0	3	0	0	2	2
CDIF630erm_01977	LarE	Ni2+ transfer protein	Cytoplasmic	Unknown function	Unknown function				x	17.2997	17.9628	18.2533	NaN	20.2815	NaN	NaN	NaN	NaN	2	2	2	0	2	0	0	0	0
CDIF630erm_01978	CDIF630erm_01978	putative RNA methylase	Cytoplasmic	DNA metabolism	Restriction/modification					21.5047	20.0141	19.0679	NaN	21.4582	NaN	NaN	NaN	NaN	5	3	4	1	4	0	1	1	1
CDIF630erm_01979	CDIF630erm_01979	putative lipoprotein	Unknown	Unknown function	Unknown function		x			NaN	20.3133	19.8524	22.5404	21.3688	21.0833	21.9657	21.6058	21.8795	1	2	3	6	4	2	4	4	3
CDIF630erm_01980	CDIF630erm_01980	two-component response regulator	Cytoplasmic	Signal transduction	Two-component systems	x				21.0587	22.531	22.2445	NaN	22.1207	NaN	NaN	NaN	NaN	4	4	3	1	5	1	0	1	1
CDIF630erm_01982	TruA2	tRNA pseudouridine synthase A	Cytoplasmic	Protein synthesis	tRNA and rRNA base modification					19.2522	19.8621	19.7074	NaN	19.3589	NaN	NaN	NaN	NaN	4	3	3	1	4	1	1	1	1
CDIF630erm_01984	ArgG	argininosuccinate synthase	Cytoplasmic	Amino acid biosynthesis	Glutamate family					NaN	19.2533	20.6197	NaN	19.2883	NaN	NaN	NaN	NaN	1	3	3	0	3	0	0	1	1
CDIF630erm_01998	TerD4	tellurium resistance protein terD	Cytoplasmic	Cellular processes	Toxin production and resistance	x				23.4847	26.1101	26.3489	23.7995	25.3035	22.8403	24.8967	22.5787	23.707	8	9	10	3	7	4	7	5	7
CDIF630erm_01999	TerD5	tellurium resistance protein terD	Cytoplasmic	Cellular processes	Toxin production and resistance					24.3229	22.8427	23.2871	23.2136	25.7235	24.5729	25.7028	24.1367	24.5261	12	9	9	4	10	3	8	6	10
CDIF630erm_02014	CDIF630erm_02014	putative phosphatase, phosphoserine phosphatase-like	Cytoplasmic	Energy metabolism	Glycolysis/gluconeogenesis					21.6752	19.7114	20.2626	NaN	23.403	NaN	21.3579	21.3459	19.8491	8	7	6	0	11	0	2	3	2
CDIF630erm_02015	CDIF630erm_02015	hypothetical protein	Unknown	Unknown function	Enzymes of unknown specificity					NaN	19.0477	19.9442	NaN	19.2086	NaN	NaN	NaN	NaN	1	6	5	1	4	1	1	0	0
CDIF630erm_02016	Cmk	cytidylate kinase	Cytoplasmic	Purines, pyrimidines, nucleosides, and nucleotides	Nucleotide and nucleoside interconversions	x				23.278	20.6717	20.7706	NaN	18.9404	NaN	NaN	NaN	NaN	9	6	5	1	2	0	0	0	1
CDIF630erm_02017	PlsC2	putative 1-acyl-sn-glycerol-3-phosphate acyltransferase	Cytoplasmic	Fatty acid and phospholipid metabolism	Biosynthesis	x		x		20.7755	NaN	NaN	23.0817	22.3137	22.7049	NaN	24.5228	25.3488	2	1	1	3	5	2	1	4	8
CDIF630erm_02018	IspH	4-hydroxy-3-methylbut-2-enyl diphosphate reductase	Cytoplasmic	Biosynthesis of cofactors, prosthetic groups, and carriers	Other					17.1279	NaN	20.2722	NaN	17.8218	NaN	NaN	NaN	NaN	2	1	3	0	2	0	0	0	0
CDIF630erm_02023	Bcp	putative peroxiredoxin	Cellwall	Protein fate	Protein modification and repair					22.8422	24.439	24.4914	19.732	24.623	NaN	NaN	20.3238	NaN	12	13	10	2	12	0	0	3	0
CDIF630erm_02027	MetY	O-acetylhomoserine sulfhydrylase	Cytoplasmic	Amino acid biosynthesis	Serine family	x			x	18.8966	19.2035	21.3364	NaN	19.4372	NaN	NaN	NaN	NaN	5	3	6	0	3	0	0	0	0
CDIF630erm_02030	FtsH1	cell division protease FtsH1	CytoplasmicMembrane	Protein fate	Degradation of proteins, peptides, and glycopeptides					NaN	19.8987	NaN	22.9101	21.1639	23.1271	21.3442	22.1974	23.5808	1	4	2	5	4	4	2	7	7
CDIF630erm_02036	AroA	3-phosphoshikimate 1-carboxyvinyltransferase	Cytoplasmic	Amino acid biosynthesis	Aromatic amino acid family					17.3404	NaN	18.8407	NaN	18.3451	NaN	NaN	NaN	NaN	2	1	2	0	2	0	0	0	0
CDIF630erm_02040	AroK	shikimate kinase	Cytoplasmic	Amino acid biosynthesis	Aromatic amino acid family					21.2134	21.4822	22.1836	21.138	22.0587	NaN	21.2282	21.2814	21.0836	3	6	6	2	5	1	2	3	3
CDIF630erm_02068	CDIF630erm_02068	putative DNA recombination protein Tn1549-like, CTn5	Cytoplasmic	DNA metabolism	DNA replication, recombination, and repair	x		x		18.702	21.0125	20.8483	NaN	20.3576	20.1331	19.7163	19.4386	NaN	4	7	4	0	3	3	3	2	0
CDIF630erm_02088	CDIF630erm_02088	transcriptional regulator, AraC family	Cytoplasmic	Regulatory functions	DNA interactions					22.3291	22.9729	22.2771	NaN	23.0023	NaN	NaN	NaN	NaN	2	3	3	0	3	1	0	1	1
CDIF630erm_02097	CDIF630erm_02097	putative methyltransferase, type 11 family	Cytoplasmic	Biosynthesis of cofactors, prosthetic	Menaquinone and ubiquinone	x				NaN	20.3276	20.3185	NaN	17.4684	NaN	NaN	NaN	NaN	0	2	2	0	2	0	0	0	0
CDIF630erm_02100	CDIF630erm_02100	putative membrane protein	Unknown	Unknown function	Unknown function			x		18.5826	19.1201	18.2963	19.899	17.9357	NaN	NaN	26.1306	25.0219	2	3	3	2	3	0	0	6	5
CDIF630erm_02103	CDIF630erm_02103	putative phage-related cell wall hydrolase (endolysin)	Cellwall	Cell envelope	Biosynthesis and degradation of murein sacculus and peptidoglycan	x				NaN	NaN	NaN	23.1563	22.5443	NaN	22.0682	23.8372	22.5887	0	1	1	2	4	1	3	5	4
CDIF630erm_02114	EutV	two-component response regulator, ethanolamine specific	Cytoplasmic	Signal transduction	Two-component systems					NaN	19.6252	20.0703	NaN	18.8274	NaN	NaN	NaN	NaN	0	3	3	0	3	0	0	1	0
CDIF630erm_02134	CDIF630erm_02134	putative exported protein	Unknown	Unknown function	Enzymes of unknown specificity	x				19.8843	21.1381	NaN	20.5973	NaN	20.8008	20.5528	21.1026	21.8655	2	3	1	2	1	2	2	2	3
CDIF630erm_02135	LexA	transcriptional regulator, LexA repressor	Cytoplasmic	Transcription	Transcription factors	x	x			21.0328	20.1897	19.8322	22.9036	21.158	22.8447	21.0224	20.6722	23.1498	3	4	2	3	4	2	2	2	3
CDIF630erm_02138	CDIF630erm_02138	GATS-like ACT domain protein	Unknown	Unknown function	Unknown function				x	17.7072	19.6799	20.2976	NaN	20.5573	NaN	NaN	NaN	NaN	2	2	2	0	2	0	0	0	0
CDIF630erm_02140	AccA	acetyl-CoA carboxylase, subunit alpha	Cytoplasmic	Fatty acid and phospholipid metabolism	Biosynthesis	x				19.7348	21.1048	21.5403	NaN	18.8543	NaN	NaN	NaN	NaN	3	4	5	1	3	0	0	1	2
CDIF630erm_02141	AccD	acetyl-CoA carboxylase, subunit beta	Cytoplasmic	Fatty acid and phospholipid metabolism	Biosynthesis					20.966	21.4264	23.2188	NaN	19.469	NaN	NaN	19.0573	18.0841	4	4	6	0	3	1	1	2	3
CDIF630erm_02142	AccC	biotin carboxylase	Cytoplasmic	Fatty acid and phospholipid metabolism	Biosynthesis		x			23.5362	24.5507	24.6655	NaN	21.301	19.4284	NaN	19.6255	23.0805	15	16	15	1	8	2	1	2	2
CDIF630erm_02143	AccB	biotin carboxyl carrier protein	Cytoplasmic	Fatty acid and phospholipid metabolism	Biosynthesis					22.8222	17.3847	18.7044	18.6872	21.43	NaN	19.823	21.4531	23.4284	5	2	3	2	3	1	2	3	3
CDIF630erm_02148	CDIF630erm_02148	FeS cluster biogenesis protein	Unknown	Unknown function	Unknown function		x	x		25.2455	24.9799	25.483	NaN	23.7557	23.6696	NaN	22.7427	22.8188	7	6	5	1	5	2	1	3	3
CDIF630erm_02158	CDIF630erm_02158	uncharacterized protein, coenzyme F420:L-glutamate ligase-like	Unknown	Unknown function	Unknown function	x				25.6789	22.8543	22.652	NaN	22.7872	NaN	NaN	19.3687	NaN	15	11	12	0	9	0	1	2	1
CDIF630erm_02175	CDIF630erm_02175	putative enzyme, cyclase family	Cytoplasmic	Unknown function	Enzymes of unknown specificity					21.8758	20.2468	20.3245	21.0593	20.9084	NaN	NaN	19.9356	21.0737	7	5	3	2	4	1	2	2	3
CDIF630erm_02177	CDIF630erm_02177	peptidase M20A, peptidase V-related	Cytoplasmic	Protein fate	Degradation of proteins, peptides, and glycopeptides				x	21.3067	20.1196	20.9269	NaN	20.4694	NaN	NaN	NaN	NaN	10	4	5	1	2	0	0	0	0
CDIF630erm_02178	CDIF630erm_02178	aluminum resistance protein	Cytoplasmic	Cellular processes	Toxin production and resistance	x	x			22.1479	23.5552	23.7812	19.3758	21.2104	20.5047	NaN	19.4897	NaN	5	11	8	2	7	2	1	2	0
CDIF630erm_02179	Hfq	Hfq-like RNA chaperone	Cytoplasmic	Regulatory functions	Other					20.3423	18.9135	17.22	NaN	20.5675	19.7052	NaN	21.7616	20.0442	2	3	3	0	3	2	0	3	2
CDIF630erm_02182	MutS	DNA mismatch repair protein MutS	CytoplasmicMembrane	DNA metabolism	DNA replication, recombination, and repair					23.3027	23.4534	23.5221	20.743	23.5128	20.9784	NaN	20.6151	22.7184	9	12	16	2	9	4	0	3	6
CDIF630erm_02183	CDIF630erm_02183	ABC-type transport system, ATP-binding protein	CytoplasmicMembrane	Transport and binding proteins	Anions			x		NaN	NaN	NaN	20.074	NaN	19.4729	NaN	20.3598	21.3795	0	0	0	3	0	3	1	4	4
CDIF630erm_02184	CDIF630erm_02184	ABC-type transport system, extracellular solute-binding protein	Unknown	Transport and binding proteins	Anions	x				18.1303	18.0721	NaN	21.8246	18.5508	19.3622	19.4962	21.996	20.4583	2	2	2	2	2	2	2	3	2
CDIF630erm_02186	CDIF630erm_02186	MTH1187/YkoF-like protein	Cytoplasmic	Unknown function	Unknown function					22.0815	19.9097	20.6479	NaN	22.6376	NaN	NaN	NaN	NaN	2	2	2	0	2	0	1	1	1
CDIF630erm_02195	MiaB	tRNA-2-methylthio-N(6)-dimethylallyladenosine synthase	Cytoplasmic	Protein synthesis	tRNA and rRNA base modification	x				22.1984	22.3194	21.3296	NaN	21.5651	NaN	19.8878	20.1449	NaN	11	11	10	1	7	2	2	2	1
CDIF630erm_02205	CspC1	major cold shock protein CspC	Cytoplasmic	Cellular processes	Adaptations to atypical conditions					21.4912	19.2194	NaN	NaN	19.3469	NaN	NaN	NaN	NaN	2	2	1	0	2	0	0	0	0
CDIF630erm_02209	CDIF630erm_02209	uncharacterized protein, AhpD-like	Unknown	Unknown function	Unknown function		x			22.4177	24.3277	24.3941	20.2706	21.6454	19.2494	20.6308	22.5216	21.7214	7	9	6	2	3	2	2	3	3
CDIF630erm_02232	HydR	transcriptional regulator, TetR family	Cytoplasmic	Regulatory functions	DNA interactions					NaN	NaN	NaN	NaN	NaN	NaN	20.4878	NaN	20.5443	0	0	0	1	0	0	2	0	2
CDIF630erm_02241	ClpB	chaperone protein	Cytoplasmic	Protein fate	Protein folding and stabilization	x				21.9343	21.0795	21.2439	21.6216	21.624	NaN	23.4605	22.8894	20.9952	6	8	5	2	4	1	2	3	3
CDIF630erm_02248	CDIF630erm_02248	N-carbamoyl-L-amino acid hydrolase	Cytoplasmic	Central intermediary metabolism	Nitrogen metabolism					19.5212	20.3394	19.302	NaN	NaN	NaN	NaN	NaN	NaN	2	4	4	0	1	0	1	0	0
CDIF630erm_02249	RacX	putative aspartate racemase RacX	Unknown	Energy metabolism	Amino acids and amines					NaN	21.6381	22.3571	NaN	21.9325	NaN	NaN	NaN	NaN	2	5	6	0	6	1	1	0	1
CDIF630erm_02270	CDIF630erm_02270	transcriptional regulator, RpiR family	CytoplasmicMembrane	Regulatory functions	DNA interactions	x	x			22.2663	22.636	23.1145	26.0153	23.6331	24.4064	24.9938	26.5869	24.7015	5	6	6	12	5	8	7	9	7
CDIF630erm_02275	LysA	diaminopimelate decarboxylase	Cytoplasmic	Amino acid biosynthesis	Aspartate family	x				19.5891	21.1393	21.1525	NaN	NaN	NaN	NaN	NaN	NaN	2	4	6	0	1	0	1	0	1
CDIF630erm_02276	LysC	aspartokinase	Cytoplasmic	Amino acid biosynthesis	Aspartate family					22.6386	24.5223	25.0085	NaN	23.5921	NaN	NaN	NaN	20.7959	12	13	12	0	7	0	1	0	3
CDIF630erm_02279	CDIF630erm_02279	putative membrane protein	CytoplasmicMembrane	Unknown function	Unknown function					20.5604	21.9952	21.3182	23.2387	21.694	21.9428	21.7236	24.9896	24.6712	2	5	4	7	5	5	2	7	7
CDIF630erm_02281	CDIF630erm_02281	hypothetical protein	Unknown	Unknown function	Unknown function					NaN	17.1189	NaN	20.7089	21.0642	NaN	21.3023	23.4987	24.6	0	2	0	4	6	1	4	7	7
CDIF630erm_02282	GlnS	glutamine-tRNA ligase	Cytoplasmic	Protein synthesis	tRNA aminoacylation	x	x			27.0745	26.472	25.6882	22.1526	25.6508	21.3254	24.6654	21.7944	21.3749	23	25	19	3	15	4	8	5	3
CDIF630erm_02284	CDIF630erm_02284	LUD domain protein	Cytoplasmic	Unknown function	Unknown function					20.2749	20.4933	19.9054	NaN	20.6572	NaN	NaN	19.6545	NaN	6	5	3	0	2	0	1	3	1
CDIF630erm_02285	CDIF630erm_02285	hypothetical protein	CytoplasmicMembrane	Unknown function	Unknown function	x				18.3869	19.7356	NaN	22.2517	18.4386	NaN	NaN	22.6793	21.8796	2	2	1	2	2	0	0	4	2
CDIF630erm_02291	CDIF630erm_02291	ABC-type transport system, ATP-binding protein	Cytoplasmic	Transport and binding proteins	Amino acids, peptides and amines	x				26.6847	27.3018	27.0493	24.4964	26.9835	25.7177	25.6328	24.6684	24.0197	26	29	25	10	25	11	9	14	8
CDIF630erm_02292	CDIF630erm_02292	putative molybdopterin cofactor biosynthesis protein	Cytoplasmic	Biosynthesis of cofactors, prosthetic	Molybdopterin					19.773	19.8557	20.3877	NaN	NaN	NaN	NaN	NaN	NaN	2	3	4	0	0	1	1	0	0
CDIF630erm_02318	CDIF630erm_02318	putative cell division GTPase	Cytoplasmic	Cellular processes	Cell division					21.7626	20.8603	21.1528	19.3731	20.6971	NaN	NaN	19.4449	NaN	6	5	3	2	5	0	0	2	2
CDIF630erm_02322	XdhA4	xanthine dehydrogenase, molybdenum binding subunit	CytoplasmicMembrane	Energy metabolism	Aerobic	x				25.2168	25.9342	25.6888	21.1406	25.2441	22.6217	23.7954	22.0211	21.7828	12	22	20	2	13	7	8	7	5
CDIF630erm_02323	XdhC3	xanthine dehydrogenase, iron-sulfur binding subunit	Cytoplasmic	Energy metabolism	Aerobic					22.9922	23.9635	25.0912	NaN	24.5264	NaN	NaN	NaN	23.4192	5	7	6	0	6	0	1	1	3
CDIF630erm_02324	XdhB3	xanthine dehydrogenase, FAD-binding subunit	Cytoplasmic	Purines, pyrimidines, nucleosides, and nucleotides	Other	x				22.1346	21.3788	21.6119	NaN	20.9213	NaN	NaN	NaN	NaN	5	5	5	0	5	1	1	0	0
CDIF630erm_02335	Tal1	transaldolase	Cytoplasmic	Energy metabolism	Pentose phosphate pathway					NaN	17.5902	18.1286	NaN	20.7446	NaN	NaN	NaN	NaN	1	2	3	1	2	1	1	0	0
CDIF630erm_02343	BipA	GTP-binding protein BipA	CytoplasmicMembrane	Protein synthesis	Translation factors	x	x			25.9979	25.9668	26.2878	20.2653	24.7485	NaN	20.7984	21.1294	21.8884	16	19	17	3	7	1	2	4	4
CDIF630erm_02344	TrxB2	thioredoxin reductase	Cytoplasmic	Energy metabolism	Electron transport	x			x	20.6668	23.3094	22.6003	NaN	20.331	NaN	NaN	NaN	NaN	2	5	5	0	3	0	0	0	0
CDIF630erm_02347	ThrC	threonine synthase	Cytoplasmic	Amino acid biosynthesis	Aspartate family					23.9901	23.5368	23.3264	NaN	21.6021	NaN	18.6615	19.0697	18.1899	16	19	11	1	8	1	2	3	2
CDIF630erm_02348	ThrB	homoserine kinase	Cytoplasmic	Amino acid biosynthesis	Serine family				x	18.8991	20.5422	20.7023	NaN	NaN	NaN	NaN	NaN	NaN	2	2	2	0	1	0	0	0	0
CDIF630erm_02349	CDIF630erm_02349	uncharacterized protein, aldolase-type	Cytoplasmic	Central intermediary metabolism	Nitrogen metabolism	x			x	22.8705	24.1033	22.7336	NaN	22.4091	NaN	NaN	NaN	NaN	3	6	3	1	3	0	0	0	0
CDIF630erm_02359	IspG	4-hydroxy-3-methylbut-2-en-1-yl diphosphate synthase	Cytoplasmic	Biosynthesis of cofactors, prosthetic groups, and carriers	Other	x				21.5237	21.4717	21.6737	NaN	21.4329	NaN	NaN	NaN	NaN	4	6	7	0	3	0	0	1	0
CDIF630erm_02363	CDIF630erm_02363	hypothetical protein	Unknown	Unknown function	Unknown function	x				18.6421	19.6836	20.7345	NaN	19.6964	NaN	NaN	NaN	NaN	2	2	3	0	3	0	0	0	1
CDIF630erm_02366	UppS1	undecaprenyl pyrophosphate synthetase	Cytoplasmic	Cell envelope	Biosynthesis and degradation of surface polysaccharides and lipopolysaccharides	x				NaN	18.5486	19.6197	NaN	NaN	NaN	NaN	NaN	NaN	2	2	3	2	2	0	2	2	0
CDIF630erm_02368	Rrf	ribosome-recycling factor	Cytoplasmic	Protein synthesis	Translation factors					25.9787	19.4121	19.5174	22.3735	21.9941	23.4496	22.7266	22.9963	24.6444	17	7	3	5	8	2	3	9	13
CDIF630erm_02369	PyrH	uridylate kinase	Cytoplasmic	Purines, pyrimidines, nucleosides, and nucleotides	Nucleotide and nucleoside interconversions					22.8529	23.4927	24.0022	22.5795	23.2429	21.5187	21.5359	21.5253	23.0335	10	11	7	4	7	3	4	5	5
CDIF630erm_02370	Tsf	elongation factor ts (EF-ts)	Cytoplasmic	Protein synthesis	Translation factors	x				27.4694	25.0716	25.5119	25.7526	26.1957	25.3786	24.5022	25.0138	25.5904	17	11	10	9	15	7	7	11	10
CDIF630erm_02371	RpsB	30S ribosomal protein S2	Cytoplasmic	Protein synthesis	Ribosomal proteins: synthesis and modification					26.0843	27.3192	26.7848	25.5134	26.9235	25.7002	24.4054	25.3926	25.7349	15	15	13	7	10	6	6	9	9
CDIF630erm_02383	CDIF630erm_02383	deblocking aminopeptidase	Cytoplasmic	Energy metabolism	Amino acids and amines		x			23.2141	23.5017	23.5252	20.5102	22.5819	20.718	20.9413	NaN	NaN	7	9	9	3	6	3	2	1	0
CDIF630erm_02387	ThiH2	2-iminoacetate synthase	Cytoplasmic	Protein fate	Protein modification and repair	x				22.3649	21.5904	21.9338	NaN	21.1252	NaN	NaN	NaN	NaN	11	5	5	0	4	1	0	1	1
CDIF630erm_02398	MsrAB	peptide methionine sulfoxide reductase MsrA/MsrB	Unknown	Cellular processes	Adaptations to atypical conditions					21.297	20.898	20.7359	NaN	20.5426	NaN	NaN	NaN	NaN	3	3	4	0	2	0	0	1	0
CDIF630erm_02400	Hcp	hydroxylamine reductase	Cytoplasmic	Energy metabolism	Amino acids and amines	x				24.091	23.7136	25.5885	22.8899	23.9095	22.7772	23.9658	22.1318	23.2059	13	14	16	5	9	4	6	3	6
CDIF630erm_02401	CDIF630erm_02401	putative iron-sulfur binding protein	Unknown	Energy metabolism	Electron transport				x	19.4574	20.7638	22.2157	NaN	19.2356	NaN	NaN	NaN	NaN	3	5	4	0	5	0	0	0	0
CDIF630erm_02406	CDIF630erm_02406	ABC-type transport system, cystine/aminoacid-family extracellular solute-binding protein	Unknown	Transport and binding proteins	Amino acids, peptides and amines	x	x			22.9319	23.5069	23.8694	24.6877	24.8193	24.5323	24.1239	26.6449	25.6841	9	14	12	10	14	10	10	14	15
CDIF630erm_02409	CDIF630erm_02409	ABC-type transport system, cystine/aminoacid-family extracellular solute-binding protein	Unknown	Transport and binding proteins	Amino acids, peptides and amines		x			24.6332	24.2199	23.892	25.6635	26.8018	25.472	25.6321	27.8354	26.9913	10	15	11	12	16	14	11	16	17
CDIF630erm_02411	CDIF630erm_02411	putative molybdopterin oxidoreductase	Cytoplasmic	Energy metabolism	Anaerobic	x	x			23.3881	23.1773	23.4748	NaN	22.6756	21.6336	NaN	20.9797	NaN	8	10	10	1	8	4	0	4	1
CDIF630erm_02413	CDIF630erm_02413	putative alpha/beta hydrolase	Cytoplasmic	Unknown function	Unknown function	x				24.1427	23.65	21.8573	NaN	23.8159	NaN	NaN	NaN	22.5212	4	4	4	0	4	1	1	1	2
CDIF630erm_02425	CDIF630erm_02425	cell wall hydrolase	Cellwall	n.d.	n.d.					23.3669	23.9415	24.3796	21.9137	24.2468	22.621	23.0358	22.5488	21.615	9	12	10	5	11	5	4	6	8
CDIF630erm_02427	FtnA	bacterial non-heme ferritin	Cytoplasmic	Transport and binding proteins	Cations and iron carrying compounds					26.163	27.1854	26.6384	23.3163	27.0552	22.1632	NaN	23.655	NaN	5	5	7	2	8	2	1	3	1
CDIF630erm_02439	AldH	aldehyde dehydrogenase	Cytoplasmic	Energy metabolism	Other			x		NaN	NaN	19.1827	20.4766	NaN	19.9563	NaN	21.4698	20.6626	0	0	2	4	1	2	1	3	2
CDIF630erm_02443	CDIF630erm_02443	ABC-type transport system, multidrug-family ATP-binding/permease	CytoplasmicMembrane	Cellular processes	Toxin production and resistance	x		x		NaN	NaN	19.1242	20.9042	NaN	20.6348	NaN	23.3251	23.0771	0	1	4	3	1	3	0	9	5
CDIF630erm_02444	CDIF630erm_02444	ABC-type transport system, multidrug-family ATP-binding/permease	CytoplasmicMembrane	Cellular processes	Toxin production and resistance	x				20.2305	19.8573	20.2215	NaN	NaN	20.6649	NaN	22.7389	22.8677	2	2	3	0	1	2	0	4	5
CDIF630erm_02446	CynT	carbonic anhydrase	Cytoplasmic	Unknown function	Unknown function					20.2543	18.3202	NaN	NaN	NaN	NaN	NaN	NaN	NaN	4	2	1	0	1	0	1	1	0
CDIF630erm_02450	AroD	dehydroquinate dehydratase	Cytoplasmic	Amino acid biosynthesis	Aromatic amino acid family				x	18.103	18.8441	18.5527	NaN	18.1835	NaN	NaN	NaN	NaN	2	2	2	0	2	0	0	0	0
CDIF630erm_02460	CDIF630erm_02460	putative radical SAM superfamily lipoprotein	Cytoplasmic	Energy metabolism	Electron transport					20.4163	21.7027	21.7288	NaN	18.7381	NaN	NaN	19.1895	NaN	5	8	4	0	2	1	1	2	1
CDIF630erm_02468	CDIF630erm_02468	transcriptional regulator, RpiR family	Cytoplasmic	Regulatory functions	DNA interactions		x			20.815	22.1814	22.6673	24.7542	23.4536	25.3312	24.1451	24.4633	24.9976	6	6	5	4	6	6	5	7	7
CDIF630erm_02478	AsnC	asparagine-tRNA ligase	Cytoplasmic	Protein synthesis	tRNA aminoacylation	x	x			26.0618	27.2284	27.0551	24.0987	25.6	23.5138	24.2075	23.8671	23.6724	21	26	23	8	20	6	8	7	11
CDIF630erm_02493	CDIF630erm_02493	cupin domain protein	Cytoplasmic	Energy metabolism	Sugars					21.8832	21.7624	22.0835	NaN	22.4837	NaN	NaN	NaN	NaN	5	7	4	1	3	0	0	0	1
CDIF630erm_02495	AmpP	xaa-pro aminopeptidase	Cytoplasmic	Protein fate	Degradation of proteins, peptides, and glycopeptides	x	x			26.1963	27.08	26.642	23.2828	25.4762	23.8902	24.9612	23.8498	24.1343	22	32	26	5	14	12	12	15	7
CDIF630erm_02497	PrsA1	peptidyl-prolyl cis-trans isomerase, PpiC-type	CytoplasmicMembrane	Protein fate	Protein folding and stabilization		x			23.773	22.7762	22.8802	28.405	26.2039	28.1132	26.6179	29.1703	28.365	12	11	11	26	19	24	14	25	25
CDIF630erm_02503	FruABC	PTS system, fructose-specific IIABC component	CytoplasmicMembrane	Signal transduction	PTS	x	x			24.8106	24.6364	24.4273	23.0823	23.9659	23.3572	23.7377	23.1533	24.9713	10	12	11	5	11	3	4	9	9
CDIF630erm_02504	FruK	fructose 1-phosphate kinase	Unknown	Energy metabolism	Sugars					22.8828	20.6409	21.469	NaN	23.6123	NaN	22.6704	20.4775	17.8651	13	8	10	1	8	1	6	5	2
CDIF630erm_02509	TopB	DNA topoisomerase III	Cytoplasmic	DNA metabolism	DNA replication, recombination, and repair					19.3897	18.4953	20.0584	NaN	NaN	20.8524	19.4442	22.1844	24.1816	4	3	3	1	1	2	2	6	11
CDIF630erm_02542	CDIF630erm_02542	putative pilin protein	CytoplasmicMembrane	Protein fate	Protein and peptide secretion and trafficking			x		NaN	NaN	NaN	20.4467	20.5016	21.6367	NaN	22.9143	23.2287	1	0	0	1	3	2	0	3	2
CDIF630erm_02548	CspD	cold shock protein D	Cytoplasmic	Cellular processes	Adaptations to atypical conditions					25.1929	23.3171	NaN	NaN	NaN	NaN	NaN	NaN	NaN	2	2	2	1	1	0	1	1	0
CDIF630erm_02556	Pgm	phosphoglucomutase	Cytoplasmic	Energy metabolism	Sugars	x	x			26.5408	25.823	25.5262	20.5312	24.5472	22.4284	22.148	21.6567	23.8212	24	19	19	3	15	5	5	5	6
CDIF630erm_02558	RpiB1	ribose-5-phosphate isomerase	Cytoplasmic	Energy metabolism	Pentose phosphate pathway	x				22.6864	23.4301	23.8414	22.403	23.4599	21.4089	23.6172	22.1634	21.8444	6	7	5	2	5	3	2	2	2
CDIF630erm_02559	Tkt'1	transketolase, C-terminal section	Cytoplasmic	Energy metabolism	Pentose phosphate pathway	x	x	x		27.966	26.9325	26.6702	24.1592	26.03	24.5369	23.8651	22.9923	23.2219	14	13	11	4	8	3	5	6	4
CDIF630erm_02560	Tkt1	transketolase, N-terminal section	Cytoplasmic	Energy metabolism	Pentose phosphate pathway		x			26.4317	26.1073	25.9359	21.7041	24.5185	NaN	NaN	NaN	NaN	9	9	10	2	10	0	0	1	1
CDIF630erm_02567	Tal2	transaldolase	Cytoplasmic	Energy metabolism	Pentose phosphate pathway					25.7197	26.0678	26.4731	25.3033	27.1433	22.7257	26.7169	25.6087	25.4526	16	14	15	7	16	2	12	8	11
CDIF630erm_02568	Xpt	xanthine phosphoribosyltransferase	Cytoplasmic	Purines, pyrimidines, nucleosides, and nucleotides	Salvage of nucleosides and nucleotides	x				22.5173	23.3809	25.1156	25.4737	25.5998	23.4022	24.2218	25.1202	25.2147	6	6	6	5	6	2	4	5	6
CDIF630erm_02574	GuaB	IMP dehydrogenase	Cytoplasmic	Purines, pyrimidines, nucleosides, and nucleotides	Purine ribonucleotide biosynthesis	x	x			28.3133	28.9857	28.9973	27.1905	27.8444	26.8507	27.7676	26.2412	26.6849	32	36	31	18	25	15	18	12	12
CDIF630erm_02575	CDIF630erm_02575	putative toxic anion resistance protein	Cytoplasmic	Cellular processes	Toxin production and resistance	x				NaN	NaN	NaN	22.5639	20.1893	23.5365	21.5434	23.6017	23.223	1	0	1	11	7	12	6	13	11
CDIF630erm_02576	CDIF630erm_02576	putative membrane protein	CytoplasmicMembrane	Cell envelope	Other	x				NaN	NaN	NaN	NaN	NaN	NaN	NaN	20.2368	19.7426	0	0	1	1	1	1	1	2	2
CDIF630erm_02577	Gbd	NAD-dependent 4-hydroxybutyrate dehydrogenase	Cytoplasmic	Energy metabolism	Fermentation					NaN	19.1825	20.7185	NaN	NaN	NaN	NaN	NaN	NaN	1	3	2	0	0	0	0	0	0
CDIF630erm_02580	AbfD	bifunctional 4-hydroxybutyryl-CoA dehydratase/vinylacetyl-CoA-delta-isomerase	Cytoplasmic	Energy metabolism	Fermentation	x				21.8363	23.2332	23.4224	NaN	19.5599	NaN	20.1064	NaN	NaN	6	8	8	0	2	1	2	0	2
CDIF630erm_02581	SucD	succinate-semialdehyde dehydrogenase (acetylating)	Cytoplasmic	Energy metabolism	Other	x	x			23.0141	23.5413	23.428	NaN	18.3049	18.8621	17.6779	19.499	17.3626	11	11	12	1	3	3	2	4	2
CDIF630erm_02600	CDIF630erm_02600	uncharacterized protein, MerB-like	Unknown	Unknown function	Unknown function	x				19.3303	23.0199	23.5395	NaN	20.5166	NaN	19.05	NaN	NaN	3	7	7	0	6	0	2	1	1
CDIF630erm_02601	CDIF630erm_02601	ABC-type transport system, nitrate/sulfonate/taurine ATP-binding protein	CytoplasmicMembrane	Transport and binding proteins	Anions					21.6864	20.4557	19.6716	21.307	21.7385	22.8744	NaN	22.8596	22.5025	2	3	5	3	3	2	1	4	5
CDIF630erm_02605	CDIF630erm_02605	ABC-type transport system, nitrate/sulfonate/taurine extracellular solute-binding protein	Unknown	Transport and binding proteins	Anions		x			25.5756	25.2845	25.5482	26.4572	26.4794	26.6859	25.9698	27.6364	27.1308	11	12	14	10	13	9	9	16	12
CDIF630erm_02608	CDIF630erm_02608	hypothetical protein	Unknown	Unknown function	Unknown function					17.3841	19.7051	21.5756	NaN	19.9721	NaN	NaN	NaN	NaN	2	3	2	1	2	0	1	1	1
CDIF630erm_02609	CDIF630erm_02609	DsrEFH-like protein	Cytoplasmic	Unknown function	Unknown function					21.8217	23.5381	22.3154	NaN	23.202	NaN	NaN	NaN	NaN	1	2	2	0	2	1	1	1	1
CDIF630erm_02619	CDIF630erm_02619	indole-3-acetate kinase	Cytoplasmic	Energy metabolism	Fermentation	x			x	20.454	20.3647	20.7471	NaN	20.5358	NaN	NaN	NaN	NaN	9	6	6	0	5	0	0	0	0
CDIF630erm_02638	CDIF630erm_02638	uncharacterized protein	Unknown	Hypothetical proteins	Domain					23.5801	24.8526	24.3799	NaN	24.3806	NaN	NaN	NaN	NaN	3	10	7	1	4	0	1	1	1
CDIF630erm_02644	CDIF630erm_02644	putative cell wall hydrolase, phosphatase-associated protein	Extracellular	Cell envelope	Biosynthesis and degradation of murein sacculus and peptidoglycan					NaN	20.1325	19.3232	22.0371	20.4396	22.3279	22.2915	20.8572	20.5589	1	5	7	2	5	2	3	3	4
CDIF630erm_02645	Dut	dUTP diphosphatase	Cytoplasmic	Purines, pyrimidines, nucleosides, and nucleotides	2'-Deoxyribonucleotide metabolism					24.6593	24.4799	24.1837	22.3657	25.4328	NaN	NaN	22.4843	NaN	9	9	9	2	9	0	0	2	0
CDIF630erm_02648	CDIF630erm_02648	putative lipoprotein	Cytoplasmic	Transport and binding proteins	Unknown substrate					17.7265	NaN	16.4527	19.7241	17.1296	17.6702	18.5147	20.8012	21.1241	4	1	2	3	4	2	2	4	4
CDIF630erm_02652	PpdK	pyruvate phosphate dikinase	Cytoplasmic	Energy metabolism	Glycolysis/gluconeogenesis			x		25.4139	25.1618	25.939	24.4617	25.342	24.3821	23.6157	22.7255	24.0266	26	31	33	8	17	9	7	9	6
CDIF630erm_02653	CDIF630erm_02653	pyruvate, phosphate dikinase regulatory protein	Cytoplasmic	Regulatory functions	Other					21.0365	21.8008	21.6753	NaN	19.4769	NaN	NaN	NaN	NaN	3	4	4	0	4	0	1	1	0
CDIF630erm_02654	CDIF630erm_02654	putative transcriptional repressor ccpn	Cytoplasmic	Regulatory functions	Other					NaN	21.2132	20.9057	NaN	19.4972	NaN	NaN	NaN	NaN	1	5	3	0	3	0	0	0	0
CDIF630erm_02675	GlyS	glycine-tRNA ligase, beta subunit	Cytoplasmic	Protein synthesis	tRNA aminoacylation	x	x			27.4619	27.7298	27.093	NaN	25.5027	24.209	21.354	23.6968	26.4454	30	32	30	1	18	10	5	7	11
CDIF630erm_02676	GlyQ	glycine-tRNA ligase, alpha subunit	Cytoplasmic	Protein synthesis	tRNA aminoacylation	x	x	x		24.1794	24.9202	24.9137	22.1551	22.0465	22.4688	20.4767	20.3435	20.7747	8	9	10	2	8	2	3	3	3
CDIF630erm_02677	CDIF630erm_02677	uncharacterized protein	Cytoplasmic	Unknown function	Unknown function					24.2383	24.2557	24.2202	25.6174	24.3472	23.9624	25.1459	24.2256	26.1079	8	10	9	9	9	5	9	10	9
CDIF630erm_02685	CDIF630erm_02685	PhoH-like protein	Cytoplasmic	Cellular processes	Adaptations to atypical conditions					19.2108	17.978	18.2859	NaN	20.4759	NaN	18.42	18.1636	NaN	5	4	2	0	4	0	2	2	0
CDIF630erm_02688	CDIF630erm_02688	putative ribosome-associated sigma 54 modulation protein	Cytoplasmic	Protein synthesis	Translation factors	x				22.0897	22.39	21.9927	NaN	22.0364	NaN	NaN	21.4622	22.3692	3	4	2	0	3	0	0	3	2
CDIF630erm_02690	CDIF630erm_02690	putative aspartyl/glutamyl-tRNA amidotransferase subunit B-related	Cytoplasmic	Unknown function	Unknown function					21.153	20.1646	19.2882	NaN	19.3483	NaN	NaN	21.5746	23.1628	3	3	3	0	3	1	0	3	4
CDIF630erm_02691	RpsU	30S ribosomal protein S21	Cytoplasmic	n.d.	n.d.				x	21.478	22.7983	21.9592	NaN	24.3038	NaN	NaN	NaN	NaN	3	3	3	1	3	0	0	0	0
CDIF630erm_02692	CDIF630erm_02692	putative histidine triad (HIT) protein	Cytoplasmic	Purines, pyrimidines, nucleosides, and nucleotides	Nucleotide and nucleoside interconversions					25.2813	24.0552	23.5128	NaN	22.9241	NaN	NaN	NaN	21.3182	5	5	3	1	3	0	1	0	2
CDIF630erm_02693	MtaB	threonylcarbamoyladenosine tRNA methylthiotransferase	Cytoplasmic	Protein synthesis	tRNA and rRNA base modification	x			x	20.5849	17.9943	20.1272	NaN	NaN	NaN	NaN	NaN	NaN	4	3	3	0	0	0	1	0	1
CDIF630erm_02694	RsmE	ribosomal RNA small subunit methyltransferase E	Cytoplasmic	Protein synthesis	tRNA and rRNA base modification					17.2009	NaN	19.6006	NaN	NaN	NaN	NaN	NaN	NaN	2	1	2	0	1	0	0	1	0
CDIF630erm_02695	PrmA	ribosomal protein L11 methyltransferase	Cytoplasmic	Protein synthesis	Ribosomal proteins: synthesis and modification					22.3986	20.0022	21.1655	NaN	19.5546	NaN	NaN	17.0188	NaN	8	6	7	1	5	1	0	2	0
CDIF630erm_02698	CDIF630erm_02698	putative CRISPR-associated negative autoregulator	Cytoplasmic	Mobile and extrachromosomal element functions	Other					19.1321	18.5548	18.3496	NaN	17.9148	NaN	NaN	NaN	NaN	3	2	3	0	2	0	1	1	0
CDIF630erm_02702	CDIF630erm_02702	ABC-type transport system, sugar-family ATP-binding protein	CytoplasmicMembrane	Unknown function	Unknown function		x			22.3458	20.9777	22.0268	26.1807	24.5479	26.5708	24.7738	25.2071	25.6865	5	6	4	8	9	6	5	5	7
CDIF630erm_02705	GlcK	glucokinase	Cytoplasmic	Unknown function	General	x				21.1416	24.4839	25.2984	20.4772	21.3596	NaN	NaN	NaN	NaN	4	12	11	2	8	1	0	1	1
CDIF630erm_02706	DnaJ	chaperone protein DnaJ	Cytoplasmic	Protein fate	Protein folding and stabilization					20.7861	21.8581	22.1146	NaN	19.6592	NaN	NaN	NaN	19.4795	5	4	6	1	3	0	1	1	2
CDIF630erm_02707	DnaK	chaperone protein DnaK	Cytoplasmic	Protein fate	Protein folding and stabilization					31.2196	29.5653	29.1904	27.8113	29.1941	27.8473	28.412	28.0718	28.3759	55	54	49	22	46	31	27	35	23
CDIF630erm_02708	GrpE	protein (HSP-70 cofactor)	Cytoplasmic	Protein fate	Protein folding and stabilization					23.5453	23.0186	22.8368	NaN	22.6307	NaN	20.4186	21.0987	20.2818	6	9	7	1	8	0	2	4	3
CDIF630erm_02713	LepA	elongation factor 4	CytoplasmicMembrane	Unknown function	Unknown function	x				24.6125	25.161	24.4393	NaN	23.7521	19.8387	NaN	20.378	20.8329	14	17	12	1	10	4	2	4	5
CDIF630erm_02719	RpsT	30S ribosomal protein S20	Cytoplasmic	Protein synthesis	Ribosomal proteins: synthesis and modification	x				24.0814	22.9222	23.1883	NaN	NaN	NaN	NaN	23.8306	23.9318	4	4	3	1	1	0	1	2	2
CDIF630erm_02725	TcdA	tRNA threonylcarbamoyladenosine dehydratase	Cytoplasmic	Biosynthesis of cofactors, prosthetic	Molybdopterin					20.6081	22.5015	23.206	NaN	20.5547	NaN	NaN	NaN	NaN	6	11	7	1	7	0	0	1	1
CDIF630erm_02729	CDIF630erm_02729	putative lipoprotein	Unknown	Unknown function	Unknown function					NaN	NaN	NaN	19.9901	18.8051	NaN	NaN	19.6731	19.8362	0	0	1	2	2	2	1	3	2
CDIF630erm_02734	CDIF630erm_02734	PTS system, fructose-like IIB component	Unknown	Signal transduction	PTS					20.5006	NaN	20.5851	NaN	NaN	NaN	NaN	NaN	NaN	3	1	3	0	1	0	0	0	0
CDIF630erm_02738	Pmi	mannose-6-phosphate isomerase	Unknown	Energy metabolism	Sugars	x				18.9438	19.4054	21.902	NaN	NaN	NaN	NaN	NaN	NaN	2	3	3	0	2	0	0	0	1
CDIF630erm_02741	SelB	selenocysteinyl-tRNA-specific translation factor	Cytoplasmic	Protein synthesis	Translation factors					23.1908	21.43	21.1743	NaN	22.4634	NaN	NaN	19.4986	19.65	12	8	6	0	5	1	1	2	3
CDIF630erm_02742	SelA	L-seryl-tRNA(Sec) selenium transferase	Cytoplasmic	Protein synthesis	tRNA aminoacylation					23.1997	23.9652	24.0673	20.9342	23.4555	21.0789	23.1996	21.8781	NaN	15	14	15	4	9	6	7	5	1
CDIF630erm_02745	DacF4	serine-type D-ala-D-ala carboxypeptidase	CytoplasmicMembrane	Cell envelope	Biosynthesis and degradation of murein sacculus and peptidoglycan	x	x			19.87	18.8079	19.4311	23.8002	22.4462	23.258	21.2267	25.228	24.4849	3	3	3	8	8	6	3	11	10
CDIF630erm_02758	PagL	phospho-alpha-glucosidase	Cytoplasmic	Energy metabolism	Sugars					22.3765	23.9667	24.955	NaN	23.1508	NaN	NaN	NaN	21.1316	2	7	6	0	4	0	0	0	2
CDIF630erm_02761	CDIF630erm_02761	PTS system, maltose-specific IIA component	Cytoplasmic	Signal transduction	PTS					NaN	21.4152	22.2549	NaN	22.2905	NaN	NaN	NaN	NaN	1	3	8	1	4	0	1	0	0
CDIF630erm_02762	YjgF	2-iminobutanoate/2-iminopropanoate deaminase	Cytoplasmic	Transcription	Degradation of RNA					29.9639	27.1495	26.3841	24.4788	27.7628	23.8417	24.9752	23.5115	22.3082	7	7	5	4	6	3	1	3	1
CDIF630erm_02763	TdcB	threonine dehydratase	Cytoplasmic	Amino acid biosynthesis	Pyruvate family					24.6031	26.1779	26.3855	NaN	24.4085	NaN	NaN	NaN	NaN	12	18	15	0	13	0	1	1	0
CDIF630erm_02764	AspD	bifunctional aspartate aminotransferase/L-aspartate beta-decarboxylase	Cytoplasmic	Energy metabolism	Amino acids and amines		x			23.3625	24.1871	24.9502	18.9146	21.3924	19.3703	NaN	19.386	19.5485	11	14	13	3	8	3	1	3	2
CDIF630erm_02765	AnsB	L-asparaginase	Cytoplasmic	Energy metabolism	Amino acids and amines				x	20.8018	22.6261	22.8357	NaN	20.8744	NaN	NaN	NaN	NaN	3	8	7	0	4	0	0	0	0
CDIF630erm_02772	LeuS	leucine-tRNA ligase	Cytoplasmic	Protein synthesis	tRNA aminoacylation	x				27.773	28.1395	27.7625	26.4487	27.7849	27.0743	27.4497	26.2835	26.2526	38	49	42	14	25	22	14	17	17
CDIF630erm_02774	RsfS	ribosomal silencing factor RsfS	Cytoplasmic	Unknown function	Unknown function					23.8599	20.6154	20.2591	NaN	22.6317	23.001	22.7061	24.5315	25.4636	7	4	3	1	2	3	2	4	6
CDIF630erm_02778	GlgB	1,4-alpha-glucan branching enzyme	Unknown	Energy metabolism	Sugars				x	18.4503	21.2578	20.8443	NaN	NaN	NaN	NaN	NaN	NaN	4	5	5	1	0	0	0	0	0
CDIF630erm_02780	CDIF630erm_02780	hypothetical protein	Cytoplasmic	Unknown function	Unknown function	x				19.8962	20.864	21.5003	NaN	20.362	NaN	NaN	NaN	NaN	2	3	3	0	2	0	1	0	0
CDIF630erm_02784	CDIF630erm_02784	putative serine-pyruvate aminotransferase	Cytoplasmic	Amino acid biosynthesis	Serine family				x	18.99	19.7657	18.954	NaN	NaN	NaN	NaN	NaN	NaN	3	2	2	0	0	0	1	0	0
CDIF630erm_02792	CDIF630erm_02792	coenzyme A disulfide reductase	Cytoplasmic	Energy metabolism	Other	x			x	19.3131	20.2332	20.0907	NaN	NaN	NaN	NaN	NaN	NaN	3	5	4	0	1	0	0	0	0
CDIF630erm_02793	TcyP	putative L-cystine uptake protein	CytoplasmicMembrane	Transport and binding proteins	Amino acids, peptides and amines	x				NaN	22.4495	22.5539	NaN	NaN	NaN	NaN	23.7433	NaN	0	2	2	0	1	0	1	3	1
CDIF630erm_02799	CDIF630erm_02799	hypothetical protein	Cytoplasmic	Unknown function	Unknown function	x	x			27.2369	26.8123	26.7107	23.441	25.8165	23.8023	25.4515	23.4322	23.9247	18	21	19	4	14	5	9	8	9
CDIF630erm_02802	CDIF630erm_02802	ABC-type transport system, sugar-family extracellular solute-binding protein	Unknown	Transport and binding proteins	Carbohydrates, organic alcohols, and acids		x	x		24.3229	22.5781	22.1987	24.6505	24.7201	24.7459	25.0035	25.8655	25.8195	13	8	11	8	15	10	6	12	9
CDIF630erm_02808	CDIF630erm_02808	hypothetical protein	Cytoplasmic	Unknown function	Unknown function					21.6461	22.055	22.0452	NaN	21.0215	NaN	NaN	NaN	NaN	5	5	5	0	5	0	0	1	1
CDIF630erm_02809	CoaD	phosphopantetheine adenylyltransferase	Cytoplasmic	Biosynthesis of cofactors, prosthetic groups, and carriers	Pantothenate and coenzyme A					NaN	21.6189	21.46	NaN	20.4027	NaN	NaN	NaN	NaN	2	5	4	0	3	0	0	0	0
CDIF630erm_02812	YloV	uncharacterized protein YloV	Cytoplasmic	Unknown function	Unknown function	x	x			24.3235	24.3881	23.4621	21.6067	23.3657	22.3935	23.209	23.0791	22.1083	21	17	14	2	13	5	6	7	3
CDIF630erm_02813	YloU	uncharacterized protein YloU	Cytoplasmic	Unknown function	Unknown function					22.5822	22.9756	21.8503	22.6367	23.3001	NaN	NaN	21.5101	NaN	4	5	3	2	4	1	1	2	1
CDIF630erm_02814	RpmB	50S ribosomal protein L28	Cytoplasmic	Protein synthesis	Ribosomal proteins: synthesis and modification					23.4796	24.0861	24.7769	NaN	23.632	NaN	NaN	NaN	NaN	2	4	3	0	3	0	0	1	1
CDIF630erm_02825	CDIF630erm_02825	putative nitroreductase-like oxidoreductase	Cytoplasmic	Central intermediary metabolism	Nitrogen metabolism					20.5294	19.7708	20.496	NaN	22.1148	NaN	21.8689	19.5405	22.0109	2	3	3	1	3	1	2	2	3
CDIF630erm_02826	CDIF630erm_02826	putative phosphoglycolate phosphatase	Cytoplasmic	Unknown function	Enzymes of unknown specificity	x				NaN	20.0872	20.0323	NaN	NaN	NaN	19.1007	NaN	NaN	2	2	2	0	1	1	2	1	0
CDIF630erm_02828	Rpe2	ribulose-phosphate 3-epimerase	Cytoplasmic	Energy metabolism	Pentose phosphate pathway					24.3741	24.5671	24.7892	21.6898	24.9793	23.5582	24.2336	22.538	23.2816	6	5	5	5	3	3	4	3	3
CDIF630erm_02831	Stk	putative serine/threonine-protein kinase	CytoplasmicMembrane	Protein fate	Protein modification and repair	x				NaN	21.0731	NaN	24.5666	22.9615	24.2593	22.859	26.4232	25.1835	1	2	1	4	5	4	2	7	5
CDIF630erm_02835	CDIF630erm_02835	putative metal-dependent peptidase	CytoplasmicMembrane	Unknown function	Unknown function	x	x			NaN	18.4405	19.0705	23.5507	22.0654	23.8463	22.4658	23.8454	24.075	1	3	3	4	5	2	2	4	4
CDIF630erm_02837	Fmt	methionyl-tRNA formyltransferase	Cytoplasmic	Protein synthesis	tRNA aminoacylation	x			x	22.5197	20.2353	18.997	NaN	18.7215	NaN	NaN	NaN	NaN	8	6	4	1	4	0	0	0	0
CDIF630erm_02842	Gmk	guanylate kinase	Cytoplasmic	Purines, pyrimidines, nucleosides, and nucleotides	Nucleotide and nucleoside interconversions					21.5715	23.231	23.1677	NaN	22.2823	NaN	21.3685	20.7965	NaN	4	6	6	1	6	1	2	2	1
CDIF630erm_02844	DapF	diaminopimelate epimerase	Cytoplasmic	Amino acid biosynthesis	Aspartate family					19.3625	23.7678	23.1973	NaN	19.5074	NaN	18.5748	18.5174	18.1223	3	8	8	0	5	0	2	3	2
CDIF630erm_02845	LtaE	low specificity L-threonine aldolase	Cytoplasmic	Energy metabolism	Amino acids and amines					21.9088	21.3922	20.4147	NaN	21.9195	NaN	20.5298	NaN	NaN	8	6	4	1	5	1	3	1	0
CDIF630erm_02846	YloA	uncharacterized protein YloA	Cytoplasmic	Cellular processes	Pathogenesis					21.0984	20.1693	19.5479	22.4287	20.6812	21.8414	21.1714	20.3761	23.1276	4	6	5	3	4	4	3	3	5
CDIF630erm_02862	TrpS	tryptophan-tRNA ligase	Cytoplasmic	Protein synthesis	tRNA aminoacylation					20.1555	17.7236	18.4442	NaN	20.9704	NaN	19.6399	NaN	NaN	7	2	5	1	3	1	2	1	1
CDIF630erm_02863	MtnN	bifunctional 5'-methylthioadenosine/S-adenosylhomocysteine nucleosidase	Cytoplasmic	Purines, pyrimidines, nucleosides, and nucleotides	Salvage of nucleosides and nucleotides					19.3926	21.4454	20.027	NaN	19.3764	NaN	NaN	NaN	21.4789	3	4	4	0	2	0	0	2	2
CDIF630erm_02866	CDIF630erm_02866	putative peptidase, M24 family	Cytoplasmic	Protein fate	Degradation of proteins, peptides, and glycopeptides					27.8554	27.7138	28.0538	21.2683	27.7321	21.9401	22.8944	23.5226	23.6078	14	16	18	3	16	3	5	7	5
CDIF630erm_02871	IleS	isoleucine-tRNA ligase	Cytoplasmic	Protein synthesis	tRNA aminoacylation	x	x			28.8192	29.2946	29.4352	26.1947	28.2949	26.8545	26.553	25.5716	26.7988	47	60	60	14	39	25	15	16	17
CDIF630erm_02873	CDIF630erm_02873	putative cell-division initiation protein DivIVA	Cytoplasmic	Cellular processes	Cell division					22.1853	24.3786	24.5442	24.1746	23.3863	23.0051	24.1726	23.8754	23.9767	7	8	9	6	9	5	5	5	8
CDIF630erm_02876	SepF	cell division protein SepF	Cytoplasmic	Cellular processes	Cell division					20.6485	21.0472	21.1525	NaN	20.8206	NaN	NaN	NaN	NaN	2	2	2	0	2	0	0	1	0
CDIF630erm_02877	CDIF630erm_02877	putative pyridoxal 5'-phosphate-dependent enzyme	Cytoplasmic	Unknown function	Enzymes of unknown specificity	x				21.4975	21.3012	21.2796	21.021	22.5259	20.4719	21.0239	20.2377	22.1674	4	6	2	2	5	2	2	3	4
CDIF630erm_02880	CDIF630erm_02880	uncharacterized protein	Cytoplasmic	Unknown function	Unknown function	x	x			26.3502	24.4166	24.7846	21.2282	23.8234	18.9321	22.6418	22.3813	20.4093	11	11	10	2	6	2	5	3	3
CDIF630erm_02881	CDIF630erm_02881	ACT domain-containing protein	Cytoplasmic	Signal transduction	Other					25.1941	21.7094	21.8575	20.6995	22.1957	NaN	21.2101	20.027	NaN	7	6	5	2	5	1	2	2	1
CDIF630erm_02884	GpsA	glycerol-3-phosphate dehydrogenase [NAD(P)+]	Cytoplasmic	Energy metabolism	Anaerobic	x				NaN	17.4296	19.2499	NaN	NaN	NaN	NaN	NaN	NaN	2	2	2	0	2	0	0	0	1
CDIF630erm_02886	Der	GTPase Der	Cytoplasmic	Protein synthesis	Other	x				23.6886	22.0254	23.1596	NaN	23.8626	NaN	NaN	20.6581	NaN	12	8	11	1	10	1	1	4	0
CDIF630erm_02893	CDIF630erm_02893	laccase domain protein	Unknown	Unknown function	Unknown function				x	19.9645	20.2866	21.2063	NaN	19.5285	NaN	NaN	NaN	NaN	3	4	3	0	3	0	0	0	0
CDIF630erm_02894	NrdR	transcriptional regulator, repressor NrdR family	Cytoplasmic	Regulatory functions	DNA interactions	x				NaN	NaN	18.355	20.8269	18.2838	NaN	NaN	NaN	20.1126	0	1	2	2	2	1	0	1	2
CDIF630erm_02900	FtsZ	cell division protein FtsZ	Cytoplasmic	Cellular processes	Cell division	x	x			25.8693	25.6205	25.2375	NaN	23.3749	18.8777	18.1803	16.4231	18.7449	16	16	16	1	13	4	3	2	4
CDIF630erm_02905	MurG	UDP-N-acetylglucosamine-N-acetylmuramyl- (pentapeptide) pyrophosphoryl-undecaprenol N-acetylglucosamine transferase	CytoplasmicMembrane	Cell envelope	Biosynthesis and degradation of murein sacculus and peptidoglycan	x				20.3815	18.1436	17.9549	NaN	18.1706	18.4991	NaN	18.2006	18.8022	3	2	3	2	3	2	1	2	2
CDIF630erm_02907	MurD	UDP-N-acetylmuramoylalanine-D-glutamate ligase	Cytoplasmic	Cell envelope	Biosynthesis and degradation of murein sacculus and peptidoglycan	x				23.0746	22.9488	23.6748	NaN	22.8436	19.8132	18.7499	19.7737	19.0876	12	10	12	1	11	3	2	3	2
CDIF630erm_02909	MurF	UDP-N-acetylmuramoyl-tripeptide-D-alanyl-D- alanine ligase (UDP-MurNAc-pentapeptide synthetase) (D-alanyl-D-alanine-adding enzyme)	Cytoplasmic	Cell envelope	Biosynthesis and degradation of murein sacculus and peptidoglycan					23.1861	24.5445	24.3042	21.1378	23.5963	21.5235	22.4937	20.7651	NaN	8	15	11	3	9	2	4	3	0
CDIF630erm_02916	YchF	ribosome-binding ATPase YchF	Cytoplasmic	Unknown function	Unknown function					23.4447	22.317	21.502	NaN	22.385	NaN	20.3802	NaN	NaN	8	7	7	0	5	1	2	1	1
CDIF630erm_02918	MurE	UDP-N-acetylmuramoyl-L-alanyl-D-glutamate-2, 6-diaminopimelate ligase	Cytoplasmic	Cell envelope	Biosynthesis and degradation of murein sacculus and peptidoglycan				x	20.3827	20.7681	20.5216	NaN	NaN	NaN	NaN	NaN	NaN	2	4	4	0	1	0	0	0	0
CDIF630erm_02921	PtsG-BC	PTS system, glucose-specific IIBC component	CytoplasmicMembrane	Transport and binding proteins	Carbohydrates, organic alcohols, and acids	x				22.7862	26.3088	25.488	25.0782	23.7816	21.7735	23.6731	27.1333	25.0483	5	9	9	4	5	3	4	11	9
CDIF630erm_02922	CDIF630erm_02922	transcription antiterminator, licT family	Cytoplasmic	Regulatory functions	RNA interactions					NaN	19.2218	21.0323	NaN	19.9742	NaN	NaN	18.9222	NaN	0	5	4	0	3	0	0	2	1
CDIF630erm_02924	AppF	ABC-type transport system, ATP-binding protein, putative oligopeptide transport system	CytoplasmicMembrane	Transport and binding proteins	Amino acids, peptides and amines	x				NaN	20.5409	21.6544	23.7102	22.9112	21.5747	NaN	24.4785	22.2734	1	3	3	3	6	3	0	5	3
CDIF630erm_02925	AppD	ABC-type transport system, ATP-binding protein, putative oligopeptide transport system	CytoplasmicMembrane	Transport and binding proteins	Amino acids, peptides and amines		x			20.8093	21.7299	22.3706	24.5653	23.3228	23.9726	23.309	24.7656	23.6168	3	4	6	5	5	3	4	5	4
CDIF630erm_02926	AppA	ABC-type transport system, oligopeptide-family solute-binding protein	Cellwall	Transport and binding proteins	Amino acids, peptides and amines		x			28.4253	26.8016	27.8869	31.8539	30.1392	32.0476	30.3466	31.4592	31.244	38	35	33	42	39	48	38	40	43
CDIF630erm_02936	Pfo	pyruvate synthase	Cytoplasmic	Energy metabolism	Electron transport		x			32.7323	33.1809	32.9375	30.9223	32.0277	31.0876	30.6474	30.9085	30.9646	56	68	70	43	55	46	38	44	41
CDIF630erm_02937	CDIF630erm_02937	phosphate acyltransferase	Cytoplasmic	Energy metabolism	Other					24.5483	22.5003	22.587	20.154	23.3628	NaN	22.1251	23.9239	23.3797	9	9	5	2	9	0	2	4	6
CDIF630erm_02938	Isf	iron-sulfur flavoprotein	Cytoplasmic	Energy metabolism	Electron transport					NaN	19.5041	20.6818	NaN	19.0812	NaN	NaN	NaN	NaN	0	3	4	0	3	0	0	0	0
CDIF630erm_02939	CDIF630erm_02939	putative sporulation stage II, protein E	Cytoplasmic	Cellular processes	Sporulation and germination	x				20.237	20.4041	19.4442	NaN	19.2545	18.8833	NaN	NaN	NaN	3	4	3	0	2	2	1	1	0
CDIF630erm_02946	Hpt1	hypoxanthine phosphoribosyltransferase	Cytoplasmic	Purines, pyrimidines, nucleosides, and nucleotides	Salvage of nucleosides and nucleotides					22.2891	24.1362	24.4506	NaN	23.2935	NaN	NaN	NaN	22.0008	5	6	7	0	6	1	0	1	2
CDIF630erm_02950	AsnA	aspartate-ammonia ligase	Cytoplasmic	Amino acid biosynthesis	Aspartate family	x				22.0667	22.7183	22.2562	NaN	21.4668	NaN	19.3319	18.1334	19.5013	6	7	6	0	6	0	2	2	3
CDIF630erm_02957	CDIF630erm_02957	putative lipoprotein	Unknown	Transport and binding proteins	Unknown substrate	x		x	x	NaN	NaN	NaN	19.5671	20.6329	20.9419	NaN	22.4179	23.4718	0	0	0	2	3	2	1	3	3
CDIF630erm_02959	CDIF630erm_02959	putative pentapeptide repeat-containing protein	Cytoplasmic	Hypothetical proteins	Domain					18.0465	19.239	21.4436	NaN	19.3285	NaN	NaN	NaN	18.4472	3	3	3	0	3	0	0	0	2
CDIF630erm_02962	CDIF630erm_02962	putative adenosine-derivate deaminase	Cytoplasmic	Purines, pyrimidines, nucleosides, and nucleotides	Pyrimidine ribonucleotide biosynthesis	x			x	23.058	23.1063	23.1932	NaN	21.991	NaN	NaN	NaN	NaN	10	9	10	0	5	0	0	0	0
CDIF630erm_02970	Cwp22	putative cell wall protein	Cellwall	Unknown function	Unknown function	x				24.7848	25.8843	26.2561	26.4563	25.8158	26.013	25.8143	26.29	26.7037	25	33	29	12	20	18	13	22	18
CDIF630erm_02971	GalE	UDP-glucose 4-epimerase	Unknown	Energy metabolism	Sugars	x			x	20.1678	22.366	23.1881	NaN	21.039	NaN	NaN	NaN	NaN	5	11	8	0	4	0	0	0	0
CDIF630erm_02972	GtaB1	UTP-glucose-1-phosphate uridylyltransferase	Cytoplasmic	Cell envelope	Biosynthesis and degradation of surface polysaccharides and lipopolysaccharides	x			x	22.7377	21.9438	21.5299	NaN	20.8917	NaN	NaN	NaN	NaN	6	10	4	0	4	0	0	0	0
CDIF630erm_02974	CDIF630erm_02974	hypothetical protein	Cytoplasmic	Unknown function	Unknown function					25.5765	25.9171	25.9235	24.6553	25.6749	25.0937	25.1817	24.6317	25.7445	34	38	34	10	20	19	12	17	13
CDIF630erm_02975	CDIF630erm_02975	putative sporulation protein	Cytoplasmic	Cellular processes	Sporulation and germination	x				24.4646	21.3386	20.9001	24.3604	23.7662	24.9873	21.793	24.4324	24.7397	13	12	8	7	9	5	2	16	13
CDIF630erm_02988	GlyA1	serine hydroxymethyltransferase	Cytoplasmic	Protein fate	Protein modification and repair	x				25.4599	24.2291	25.272	NaN	22.8766	NaN	20.453	NaN	NaN	16	11	15	0	10	1	2	0	1
CDIF630erm_02991	CDIF630erm_02991	putative regulator of the sigma(E) factor	Cytoplasmic	Transcription	DNA-dependent RNA polymerase			x		NaN	NaN	NaN	24.061	NaN	23.2891	22.3102	22.2419	21.7253	1	1	1	3	2	2	2	3	2
CDIF630erm_02998	Cwp14	putative cell wall-binding protein	Cellwall	Cell envelope	Other	x	x	x		NaN	18.3145	18.7005	22.2878	22.4037	22.2505	20.1471	20.8922	21.5736	0	3	5	8	8	6	5	5	5
CDIF630erm_03000	CDIF630erm_03000	putative beta-ureidopropionase	Cytoplasmic	Central intermediary metabolism	Nitrogen metabolism					20.4859	22.0686	21.1624	NaN	19.7054	NaN	NaN	NaN	18.8975	6	8	6	0	5	0	0	1	2
CDIF630erm_03002	AspS	aspartate-tRNA ligase	Cytoplasmic	Protein synthesis	tRNA aminoacylation	x	x			27.6129	27.4128	27.4305	25.233	26.4411	25.093	25.2028	24.3876	25.1126	24	25	25	6	16	12	9	10	7
CDIF630erm_03003	HisS	histidine-tRNA ligase	Cytoplasmic	Protein synthesis	tRNA aminoacylation					23.266	22.4357	23.3675	21.2508	22.449	NaN	NaN	NaN	NaN	8	9	9	2	5	1	0	1	1
CDIF630erm_03005	CDIF630erm_03005	putative hydrolase beta-lactamase-like	Cytoplasmic	Cell envelope	Biosynthesis and degradation of murein sacculus and peptidoglycan					21.957	23.7461	23.8545	NaN	22.2513	NaN	NaN	NaN	21.9072	6	8	8	1	5	1	1	1	2
CDIF630erm_03006	Dtd	D-tyrosyl-tRNA(Tyr) deacylase	Unknown	Protein synthesis	tRNA aminoacylation			x		23.7497	23.1435	23.6987	22.3358	23.7109	NaN	NaN	22.1793	21.3874	4	3	3	2	2	1	1	2	2
CDIF630erm_03008	Apt	adenine phosphoribosyltransferase	Cytoplasmic	Purines, pyrimidines, nucleosides, and nucleotides	Salvage of nucleosides and nucleotides					24.7844	18.9387	20.2055	NaN	20.8586	NaN	NaN	NaN	NaN	9	1	5	1	6	1	1	1	0
CDIF630erm_03011	CDIF630erm_03011	uncharacterized protein, LpxA-like	Unknown	Amino acid biosynthesis	Pyruvate family					21.9858	22.248	21.3424	NaN	21.5079	NaN	NaN	NaN	NaN	3	3	2	0	2	1	1	1	1
CDIF630erm_03012	CDIF630erm_03012	radical SAM maturase	Cytoplasmic	Regulatory functions	Other	x				20.5963	21.2751	22.5147	NaN	21.3533	NaN	19.8547	19.5386	NaN	7	6	10	1	7	0	2	2	1
CDIF630erm_03018	PtsI	phosphoenolpyruvate-protein phosphotransferase	Cytoplasmic	Signal transduction	PTS	x	x			29.4577	29.4468	28.7088	25.7871	28.3096	27.2627	27.4481	27.2693	27.2512	45	45	39	14	33	21	21	21	15
CDIF630erm_03019	PtsH	phosphocarrier protein HPr	Cytoplasmic	Signal transduction	PTS	x	x	x		22.8909	23.0408	22.4927	21.7687	21.8774	NaN	22.824	24.9007	23.6736	5	6	4	2	4	0	4	5	4
CDIF630erm_03020	CDIF630erm_03020	putative phospholipase	Cytoplasmic	Unknown function	Unknown function					NaN	21.1479	NaN	NaN	23.8532	23.9011	26.1384	22.5866	NaN	1	2	1	1	2	2	2	2	1
CDIF630erm_03026	CDIF630erm_03026	putative lipoprotein	Cytoplasmic	Unknown function	Unknown function	x				NaN	NaN	NaN	NaN	NaN	22.4336	NaN	21.0548	21.0519	0	0	0	0	0	2	0	4	2
CDIF630erm_03029	CDIF630erm_03029	transcriptional regulator, LytR family	CytoplasmicMembrane	Regulatory functions	Other					NaN	21.1366	19.8296	24.8254	22.8173	24.7801	23.5183	24.449	23.0846	1	4	3	6	7	6	8	9	8
CDIF630erm_03030	Cwp19	cell surface protein	Cellwall	Cell envelope	Other	x	x			23.6337	25.531	26.0689	27.6048	27.3784	28.9177	27.4926	29.1524	27.9351	12	25	25	23	26	37	25	40	33
CDIF630erm_03031	CDIF630erm_03031	putative cell-wall hydrolase	Extracellular	Cell envelope	Biosynthesis and degradation of murein sacculus and peptidoglycan					NaN	NaN	NaN	22.6715	NaN	22.932	25.1735	22.9423	23.459	1	1	1	2	1	3	5	3	4
CDIF630erm_03034	RkpK	UDP-glucose 6-dehydrogenase	Cytoplasmic	Cell envelope	Biosynthesis and degradation of murein sacculus and peptidoglycan	x				19.8678	22.5118	23.1122	NaN	20.4965	NaN	NaN	NaN	17.7267	8	9	11	2	8	1	2	1	2
CDIF630erm_03035	TuaG1	putative glycosyl transferase, family 2	CytoplasmicMembrane	Cell envelope	Biosynthesis and degradation of surface polysaccharides and lipopolysaccharides	x				18.318	19.7327	17.7133	22.0711	21.4208	19.3543	NaN	19.2414	20.0204	2	4	3	4	5	3	0	2	3
CDIF630erm_03037	CDIF630erm_03037	putative glycosyl transferase, family 2	Cytoplasmic	Cell envelope	Biosynthesis and degradation of surface polysaccharides and lipopolysaccharides			x		NaN	NaN	NaN	22.3006	21.6182	NaN	NaN	20.4997	21.0812	1	1	0	3	2	1	0	4	3
CDIF630erm_03038	CDIF630erm_03038	putative CDP-glycerol/ribitol transferase	CytoplasmicMembrane	Fatty acid and phospholipid metabolis	Biosynthesis	x				NaN	NaN	NaN	21.5976	21.162	22.0715	21.5362	22.7911	22.6508	1	0	1	2	4	2	5	5	5
CDIF630erm_03041	CDIF630erm_03041	putative glycosyl transferase	Cytoplasmic	Energy metabolism	Sugars	x				21.1108	22.8499	22.7706	NaN	21.4759	NaN	NaN	NaN	NaN	5	6	5	0	5	0	0	0	1
CDIF630erm_03043	PgcA2	phosphoglucomutase	Cytoplasmic	Energy metabolism	Sugars	x		x		21.0989	23.3612	24.5948	19.7162	21.8791	19.4938	19.4736	18.8088	18.5452	11	15	19	3	10	2	2	3	3
CDIF630erm_03045	Cwp7	cell wall binding protein	Cellwall	Cell envelope	Other			x		NaN	NaN	20.3414	20.9464	20.4043	21.7281	NaN	23.745	22.7455	1	1	2	2	3	3	1	4	4
CDIF630erm_03046	CDIF630erm_03046	putative UDP-N-acetylgalactosamine-undecaprenyl-phosphate N-acetylgalactosaminephosphotransferase	CytoplasmicMembrane	Cell envelope	Biosynthesis and degradation of surface polysaccharides and lipopolysaccharides	x				NaN	NaN	NaN	24.524	NaN	24.6341	NaN	NaN	NaN	0	0	0	2	1	2	0	2	3
CDIF630erm_03047	Cwp6	putative N-acetylmuramoyl-L-alanine amidase	Cellwall	Cell envelope	Biosynthesis and degradation of murein sacculus and peptidoglycan	x	x			22.4713	23.3237	23.9833	28.5168	26.6922	27.3366	27.0399	26.888	27.7634	16	21	20	28	28	25	22	25	23
CDIF630erm_03049	Cwp5	putative cell surface protein	Cellwall	Cell envelope	Other	x	x			17.0142	20.4891	19.2138	26.1729	25.4345	26.6413	24.4172	26.2645	27.1026	2	5	6	21	18	21	15	22	21
CDIF630erm_03050	Cwp84	cell surface protein	Cellwall	Cell envelope	Other	x	x			23.4502	25.2566	25.6828	29.9628	28.6244	29.308	29.3142	29.7848	30.6219	11	21	19	23	25	30	22	34	33
CDIF630erm_03052	Cwp66	cell surface protein	Cellwall	Cell envelope	Other		x	x		22.4671	24.3453	24.4939	25.7029	24.9594	26.3681	24.2374	24.0344	22.9425	7	18	14	9	11	7	9	9	7
CDIF630erm_03053	CDIF630erm_03053	putative LmbE-like deacetylase	Cytoplasmic	Unknown function	Unknown function					22.1095	20.9051	18.8924	NaN	19.557	NaN	NaN	NaN	NaN	6	4	3	0	3	0	1	0	0
CDIF630erm_03054	Cwp2	cell wall binding protein	Cellwall	Cell envelope	Surface structures	x	x			28.1538	28.7348	29.364	32.3266	31.75	32.7405	32.6797	33.3158	32.5432	47	53	50	59	60	80	57	61	57
CDIF630erm_03055	SecA2	protein translocase subunit secA 2	Cytoplasmic	Protein fate	Protein and peptide secretion and trafficking					26.3878	25.4208	25.091	23.1879	25.3637	24.139	21.6869	24.2776	24.9705	33	35	30	7	21	11	6	10	13
CDIF630erm_03056	SlpA	S-layer precursor protein	Cellwall	Cell envelope	Surface structures	x	x	x		32.1592	31.6577	32.2215	35.2236	35.1905	34.9263	36.5412	36.0775	36.0139	77	71	75	78	89	120	93	90	85
CDIF630erm_03057	Cwp12	cell wall binding protein	Cellwall	Cell envelope	Other					21.0315	24.1425	24.0056	20.1224	22.8978	20.2059	21.4081	19.7579	18.7047	7	14	13	1	15	4	3	4	2
CDIF630erm_03058	Cwp11	cell wall binding protein	Cellwall	Cell envelope	Biosynthesis and degradation of murein sacculus and peptidoglycan					19.9518	20.6206	20.8107	NaN	19.6316	NaN	20.709	NaN	NaN	4	4	4	1	3	0	2	1	1
CDIF630erm_03059	Cwp10	cell surface protein	Cellwall	Cell envelope	Biosynthesis and degradation of murein sacculus and peptidoglycan	x				19.4864	22.7379	21.4426	22.5459	24.3314	22.4937	23.4437	23.96	23.7487	4	9	12	11	18	7	8	15	13
CDIF630erm_03060	CDIF630erm_03060	putative calcium-binding adhesion protein	Unknown	Transport and binding proteins	Cations and iron carrying compounds		x			26.0429	26.3639	26.7132	27.8671	28.048	28.5941	27.1969	27.822	28.1646	48	55	50	46	57	60	41	51	57
CDIF630erm_03063	Cwp8	cell wall binding protein	Cellwall	Cell envelope	Other	x	x			18.0131	16.66	16.7562	19.1448	20.4237	22.3096	22.1983	23.3649	24.509	4	2	2	4	4	10	7	12	12
CDIF630erm_03066	CDIF630erm_03066	preprotein translocase, yajc subunit	CytoplasmicMembrane	Protein fate	Protein and peptide secretion and trafficking	x	x			20.8763	19.2509	19.0337	25.9363	24.5631	25.5967	25.1684	26.542	26.3501	1	2	2	3	4	4	3	5	4
CDIF630erm_03067	Tgt	queuine tRNA-ribosyltransferase	Cytoplasmic	Protein synthesis	tRNA and rRNA base modification	x				NaN	19.5719	19.2925	NaN	NaN	NaN	NaN	NaN	NaN	2	2	2	1	1	0	1	0	0
CDIF630erm_03069	QueA	S-adenosylmethionine:tRNA ribosyltransferase-isomerase	Cytoplasmic	Protein synthesis	tRNA and rRNA base modification				x	19.3817	20.4272	20.3232	NaN	NaN	NaN	NaN	NaN	NaN	4	4	3	0	2	0	0	0	0
CDIF630erm_03091	CDIF630erm_03091	transcriptional regulator, MarR family	Cytoplasmic	Regulatory functions	DNA interactions					NaN	20.197	20.4583	NaN	20.024	NaN	NaN	NaN	NaN	1	4	3	1	3	0	0	1	1
CDIF630erm_03107	SerS2	serine-tRNA ligase	Cytoplasmic	Protein synthesis	tRNA aminoacylation			x		21.604	21.709	24.1439	23.303	22.5471	NaN	24.1453	24.6475	24.3897	3	4	5	2	3	1	2	2	2
CDIF630erm_03108	CDIF630erm_03108	putative amidohydrolase	Cytoplasmic	Central intermediary metabolism	Nitrogen metabolism	x				23.5696	23.3529	23.2156	20.6278	23.6066	21.389	23.7521	21.5534	21.394	12	10	9	2	11	4	7	6	4
CDIF630erm_03110	CDIF630erm_03110	putative zinc-binding dehydrogenase	Unknown	Unknown function	Enzymes of unknown specificity	x			x	22.1104	22.4895	23.568	NaN	NaN	NaN	NaN	NaN	NaN	3	6	4	1	1	0	0	0	0
CDIF630erm_03114	CDIF630erm_03114	putative bactofilin	Cytoplasmic	Unknown function	Unknown function					NaN	20.1769	20.5866	NaN	NaN	NaN	NaN	20.6793	20.4103	3	5	3	1	2	0	1	2	2
CDIF630erm_03115	CDIF630erm_03115	putative bactofilin	Unknown	Unknown function	Unknown function					23.2977	23.9439	NaN	NaN	NaN	NaN	NaN	NaN	NaN	2	5	1	0	1	0	1	0	0
CDIF630erm_03117	CDIF630erm_03117	transcriptional regulator, DeoR family	Cytoplasmic	Regulatory functions	DNA interactions		x			20.2988	21.0939	19.6907	24.7894	23.7648	24.9449	25.541	25.5436	24.7277	4	7	4	7	11	5	11	13	11
CDIF630erm_03118	DltC	D-alanine-poly(phosphoribitol) ligase subunit 2	Cytoplasmic	Cell envelope	Biosynthesis and degradation of murein sacculus and peptidoglycan					24.3534	23.7862	24.0525	NaN	22.8989	NaN	NaN	NaN	NaN	3	4	2	0	2	0	0	1	1
CDIF630erm_03120	DltA	D-alanine-poly(phosphoribitol) ligase subunit 1	Cytoplasmic	Protein synthesis	Other	x	x			21.1134	21.3593	22.4429	NaN	20.597	19.8135	19.8532	NaN	NaN	6	7	6	0	2	2	2	2	1
CDIF630erm_03134	CDIF630erm_03134	putative modulator of DNA gyrase, peptidase U62	Cytoplasmic	Protein fate	Degradation of proteins, peptides, and glycopeptides			x		21.4346	20.5019	20.1998	NaN	20.4115	20.5747	20.0674	18.8219	NaN	6	5	6	1	5	2	3	2	0
CDIF630erm_03135	TldD	metalloprotease TldD	Cytoplasmic	Protein fate	Degradation of proteins, peptides, and glycopeptides				x	22.1325	21.5332	22.2201	NaN	19.8601	NaN	NaN	NaN	NaN	7	7	9	1	3	1	0	0	0
CDIF630erm_03147	CDIF630erm_03147	hypothetical protein	Cytoplasmic	Unknown function	Unknown function	x				21.1234	17.8202	NaN	NaN	NaN	NaN	NaN	18.6109	NaN	2	2	1	0	1	0	0	2	1
CDIF630erm_03161	CDIF630erm_03161	putative protein-export protein, SecB-like	Cytoplasmic	n.d.	n.d.					23.3422	21.4363	22.024	NaN	23.9362	NaN	NaN	23.3568	23.8319	8	5	4	1	7	1	1	4	7
CDIF630erm_03178	CDIF630erm_03178	putative phage protein	Cytoplasmic	Unknown function	Unknown function					NaN	19.6024	19.7588	NaN	NaN	NaN	NaN	NaN	NaN	1	2	3	0	1	1	0	0	0
CDIF630erm_03197	CDIF630erm_03197	putative phage protein	Unknown	n.d.	n.d.					22.8847	21.7901	20.4751	NaN	20.6214	NaN	NaN	NaN	NaN	3	3	2	0	2	0	0	1	0
CDIF630erm_03200	CDIF630erm_03200	putative phage protein	CytoplasmicMembrane	Unknown function	Unknown function					19.6629	19.9811	20.6401	23.6283	20.9919	22.006	21.0684	22.5606	23.457	2	4	6	6	8	2	3	3	7
CDIF630erm_03238	AtpB1	V-type ATP synthase subunit B	Cytoplasmic	Energy metabolism	ATP-proton motive force interconversion		x			21.7427	20.6634	19.8988	23.6458	22.3536	23.7248	23.8701	22.8055	22.7358	2	8	5	9	8	8	9	9	5
CDIF630erm_03239	AtpA1	V-type ATP synthase subunit A	CytoplasmicMembrane	Energy metabolism	ATP-proton motive force interconversion	x	x			18.1397	19.8183	20.4769	24.4427	22.3377	22.5779	23.2264	24.4764	25.4152	2	4	3	9	12	12	8	17	14
CDIF630erm_03242	AtpE1	V-type ATP synthase subunit E	Cytoplasmic	Energy metabolism	ATP-proton motive force interconversion					NaN	NaN	NaN	NaN	NaN	NaN	NaN	20.2241	22.641	0	1	0	1	1	1	0	3	4
CDIF630erm_03245	CDIF630erm_03245	uncharacterized protein	Cytoplasmic	Unknown function	Unknown function					NaN	NaN	NaN	NaN	NaN	NaN	NaN	20.1733	21.4906	0	1	0	0	1	0	0	3	3
CDIF630erm_03247	CDIF630erm_03247	peptidoglycan transpeptidase	Unknown	Cell envelope	Other	x	x			19.6203	21.7527	21.015	23.0953	22.3548	23.2607	22.9017	24.8509	24.0611	2	5	4	5	3	4	4	8	7
CDIF630erm_03248	CDIF630erm_03248	putative tRNA-binding protein	Cytoplasmic	Protein synthesis	tRNA and rRNA base modification	x				NaN	18.5053	17.6889	NaN	NaN	NaN	NaN	NaN	NaN	1	2	2	1	1	0	0	0	0
CDIF630erm_03250	AdhE2	aldehyde-alcohol dehydrogenase	Cytoplasmic	Energy metabolism	Other					33.3934	33.158	33.0477	32.5998	32.8752	33.0977	32.3362	32.9078	32.9318	59	59	58	46	52	54	41	49	51
CDIF630erm_03273	SsuA2	ABC-type transport system, sulfonate-family extracellular solute-binding protein	Unknown	Transport and binding proteins	Other					NaN	21.0644	21.2603	20.4948	22.0572	NaN	22.0849	20.4933	22.8375	1	2	4	4	2	0	3	4	2
CDIF630erm_03279	NrdE	ribonucleoside-diphosphate reductase subunit alpha	Cytoplasmic	Purines, pyrimidines, nucleosides, and nucleotides	2'-Deoxyribonucleotide metabolism					NaN	20.3631	20.4828	NaN	21.0267	NaN	NaN	NaN	NaN	1	4	5	1	2	1	0	1	0
CDIF630erm_03283	BtuF	ABC-type transport system, cobalamin-spewcific extracellular solute-binding protein	Unknown	Transport and binding proteins	Cations and iron carrying compounds	x	x			21.4214	19.4157	NaN	24.5141	22.9572	23.974	22.829	24.7656	23.4695	6	2	1	5	7	4	4	7	4
CDIF630erm_03290	CDIF630erm_03290	transcriptional regulator, IclR family	Cytoplasmic	Regulatory functions	DNA interactions					NaN	18.7201	19.5654	NaN	20.4232	NaN	19.5697	19.7053	19.4222	1	4	2	0	3	0	2	2	2
CDIF630erm_03294	CDIF630erm_03294	putative pyridine nucleotide-disulfide oxidoreductase, class I	Cytoplasmic	Energy metabolism	Other		x			23.2643	22.549	21.6102	19.8531	19.4176	21.1705	NaN	18.3644	NaN	10	9	7	3	4	3	0	2	0
CDIF630erm_03297	CDIF630erm_03297	putative mannosylglycerate hydrolase	Cytoplasmic	Energy metabolism	Sugars					23.4927	23.0897	22.9048	20.635	23.1763	21.2431	NaN	19.8592	NaN	8	13	14	2	8	3	0	2	0
CDIF630erm_03299	CDIF630erm_03299	PTS system, mannose-specific IIB component	Unknown	Signal transduction	PTS	x				23.0744	20.6166	21.0054	NaN	22.6096	NaN	NaN	NaN	NaN	3	2	1	0	1	1	0	1	1
CDIF630erm_03303	CDIF630erm_03303	CGCAxxGCC motif protein	Cytoplasmic	Unknown function	Unknown function	x				23.8542	23.7152	24.4158	22.7228	24.9525	NaN	21.3514	21.1766	22.5155	8	7	6	2	9	1	2	3	4
CDIF630erm_03311	CDIF630erm_03311	PTS system, arabinose-specific IIA component	Cytoplasmic	Signal transduction	PTS	x				25.9166	25.98	25.7681	26.0943	25.2415	25.0528	25.2879	24.2018	24.9088	8	9	7	5	6	4	5	5	5
CDIF630erm_03312	KpsF	arabinose 5-phosphate isomerase	Cytoplasmic	Cell envelope	Biosynthesis and degradation of surface polysaccharides and lipopolysaccharides					20.8889	23.9021	23.838	NaN	22.3505	20.9112	22.479	21.1023	NaN	3	4	5	1	3	2	2	2	1
CDIF630erm_03315	CDIF630erm_03315	transcription antiterminator, PTS operon regulator	Cytoplasmic	Signal transduction	PTS					19.2662	21.0507	22.2888	NaN	20.3434	NaN	NaN	20.0162	19.2367	3	5	7	1	4	1	1	2	2
CDIF630erm_03317	TrxA3	thioredoxin	Cytoplasmic	Energy metabolism	Electron transport			x		24.7469	21.8408	22.1212	23.6956	24.3917	23.113	21.4841	20.1321	19.9569	6	5	3	4	6	3	3	2	1
CDIF630erm_03319	YddE-3	putative isomerase YddE	Cytoplasmic	Cellular processes	Toxin production and resistance					20.6545	24.0474	21.5378	NaN	21.1925	NaN	NaN	19.8825	NaN	2	9	3	0	3	0	0	2	1
CDIF630erm_03325	PepI	proline iminopeptidase	Cytoplasmic	Energy metabolism	Amino acids and amines					23.3928	21.8627	21.1551	NaN	22.4409	NaN	NaN	20.3563	NaN	8	8	4	0	6	1	0	3	1
CDIF630erm_03327	CDIF630erm_03327	uncharacterized protein, transglutaminase-like	Unknown	Unknown function	Unknown function					19.157	23.3598	23.7898	17.8779	21.0484	NaN	18.5724	NaN	17.1928	3	12	13	3	9	0	2	0	2
CDIF630erm_03351	XynB	PTS system, xyloside-specific IIB component	Cytoplasmic	Signal transduction	PTS				x	22.2398	22.0965	19.8224	NaN	20.3785	NaN	NaN	NaN	NaN	3	3	2	0	3	0	0	0	0
CDIF630erm_03355	CDIF630erm_03355	hypothetical protein	Cytoplasmic	Hypothetical proteins	Domain					21.1031	23.1798	23.5081	NaN	22.5124	NaN	19.6666	NaN	20.7851	5	7	7	0	6	0	2	0	2
CDIF630erm_03371	CDIF630erm_03371	putative cellobiose-phosphate degrading protein	Cytoplasmic	Energy metabolism	Biosynthesis and degradation of polysaccharides					NaN	20.8642	21.6583	NaN	20.0756	NaN	NaN	NaN	NaN	1	4	4	0	2	1	0	1	1
CDIF630erm_03372	CDIF630erm_03372	PTS system, glucose-like IIBC component	CytoplasmicMembrane	Signal transduction	PTS	x				NaN	23.1313	NaN	NaN	NaN	NaN	NaN	23.4565	22.4793	0	2	1	1	1	0	0	3	4
CDIF630erm_03374	TreA	trehalose-6-phosphate hydrolase	Cytoplasmic	Energy metabolism	Sugars	x				23.7062	22.6522	21.0522	21.4089	23.4749	23.0393	24.1169	22.436	22.1578	20	18	10	4	11	9	8	9	4
CDIF630erm_03378	BglA3	6-phospho-beta-glucosidase	Cytoplasmic	Energy metabolism	Glycolysis/gluconeogenesis				x	20.4201	20.6195	21.0359	NaN	20.5066	NaN	NaN	NaN	NaN	2	3	5	0	2	0	0	0	0
CDIF630erm_03382	CDIF630erm_03382	putative amidohydrolase, M20D family	Cytoplasmic	Protein fate	Degradation of proteins, peptides, and glycopeptides					24.5433	22.3584	23.1646	NaN	22.7609	NaN	20.6305	21.5815	NaN	8	5	7	1	4	1	2	2	1
CDIF630erm_03387	CDIF630erm_03387	PTS system, glucose-like IIA component	CytoplasmicMembrane	Signal transduction	PTS					24.999	22.4489	21.2569	23.5359	22.3811	NaN	NaN	23.9752	NaN	3	3	2	2	3	1	1	3	1
CDIF630erm_03395	CDIF630erm_03395	hypothetical protein	Unknown	Unknown function	Unknown function				x	NaN	NaN	NaN	22.8054	18.0837	19.3332	19.5606	19.531	22.0315	0	0	0	8	3	2	2	3	8
CDIF630erm_03399	BglA4	6-phospho-beta-glucosidase	Cytoplasmic	Energy metabolism	Glycolysis/gluconeogenesis					21.3206	21.8418	22.9271	NaN	21.0083	NaN	NaN	NaN	NaN	7	9	7	1	4	0	1	1	0
CDIF630erm_03421	BglA5	6-phospho-beta-glucosidase	Cytoplasmic	Energy metabolism	Glycolysis/gluconeogenesis	x	x			25.6944	25.7534	26.1359	22.8923	24.7983	21.0856	21.5594	20.9732	18.493	13	18	16	3	12	4	3	3	2
CDIF630erm_03422	BglF5	PTS system, beta-glucoside-specific IIABC component,	CytoplasmicMembrane	Signal transduction	PTS	x				20.0622	20.8327	21.8203	22.721	23.1325	21.2176	20.6548	23.56	23.1307	2	2	4	2	2	2	2	3	4
CDIF630erm_03423	BglG4	transcription antiterminator, PTS operon regulator,	Cytoplasmic	Signal transduction	PTS	x				NaN	18.9833	20.2002	NaN	NaN	NaN	NaN	NaN	NaN	0	2	2	0	1	0	0	0	0
CDIF630erm_03429	CDIF630erm_03429	putative serine-aspartate repeat-containing protein SdrF	Extracellular	Amino acid biosynthesis	Aspartate family		x	x		22.1476	23.5949	24.0741	26.4287	26.7846	27.3877	25.7182	25.9592	26.2513	6	12	14	18	19	19	15	16	18
CDIF630erm_03448	SmpB	SsrA-binding protein	Cytoplasmic	Protein synthesis	Other					22.5158	24.1013	24.0607	NaN	21.9779	NaN	NaN	NaN	21.2661	3	4	3	1	4	1	1	1	2
CDIF630erm_03449	CDIF630erm_03449	transcriptional regulator, TRAP family	CytoplasmicMembrane	Regulatory functions	RNA interactions	x				20.994	22.1542	22.816	23.4947	22.1102	23.556	22.7565	21.8385	24.0088	4	10	7	8	8	6	6	6	9
CDIF630erm_03455	Rnr	ribonuclease R	Cytoplasmic	Transcription	Degradation of RNA					21.7506	23.7634	23.3534	21.5847	23.5385	20.3447	21.6022	19.715	19.4116	7	20	14	3	9	2	4	2	3
CDIF630erm_03458	CDIF630erm_03458	putative phosphatidylethanolamine-binding regulatory protein	Unknown	Unknown function	Unknown function				x	20.4571	19.8774	18.7143	NaN	20.3907	NaN	NaN	NaN	NaN	2	2	2	0	2	0	0	0	0
CDIF630erm_03462	Eno	enolase	Cytoplasmic	Energy metabolism	Glycolysis/gluconeogenesis	x	x			30.0743	30.5754	30.2573	27.6299	29.1156	28.0377	27.944	28.2799	27.2422	23	23	19	10	19	9	11	12	10
CDIF630erm_03463	GpmI	2,3-bisphosphoglycerate-independent phosphoglycerate mutase	Cytoplasmic	Energy metabolism	Glycolysis/gluconeogenesis	x				27.5132	25.4487	25.2721	24.4082	26.2044	25.6803	26.0378	25.2687	23.7964	20	19	18	6	17	9	12	11	7
CDIF630erm_03464	Tpi	triosephosphate isomerase	Cytoplasmic	Energy metabolism	Glycolysis/gluconeogenesis					28.2994	25.558	24.1048	22.9895	27.423	24.8228	25.6538	24.9869	23.913	16	11	12	5	14	6	9	8	7
CDIF630erm_03465	Pgk	phosphoglycerate kinase	Cytoplasmic	Energy metabolism	Glycolysis/gluconeogenesis	x	x			28.9915	28.2809	28.0935	25.904	27.9216	26.2958	27.2334	26.2491	25.7971	23	21	23	9	19	9	13	12	11
CDIF630erm_03466	GapA	glyceraldehyde-3-phosphate dehydrogenase	Cytoplasmic	Energy metabolism	Glycolysis/gluconeogenesis	x	x			30.3286	31.0897	31.2935	28.9162	30.1528	28.7971	28.9353	28.1776	27.4154	24	25	23	19	23	20	19	19	18
CDIF630erm_03467	CggR	transcriptional regulator, SorC family	Cytoplasmic	Regulatory functions	DNA interactions	x				21.7655	23.1363	23.7444	NaN	20.788	17.9654	18.1926	NaN	NaN	10	16	16	0	9	2	3	1	1
CDIF630erm_03475	CDIF630erm_03475	putative peptidase, M20 family	Cytoplasmic	Protein fate	Degradation of proteins, peptides, and glycopeptides				x	19.5007	19.3397	19.7814	NaN	18.9789	NaN	NaN	NaN	NaN	4	4	4	0	2	0	0	0	0
CDIF630erm_03476	DpaL2	diaminopropionate ammonia-lyase	Cytoplasmic	Energy metabolism	Other				x	19.1239	17.4433	17.8582	NaN	NaN	NaN	NaN	NaN	NaN	3	2	3	0	0	0	0	0	0
CDIF630erm_03499	CDIF630erm_03499	putative nitroreductase-like oxidoreductase	Cytoplasmic	Central intermediary metabolism	Nitrogen metabolism					20.3811	19.0377	19.3035	NaN	21.3825	NaN	21.4557	20.557	20.2182	4	3	4	0	4	1	2	2	2
CDIF630erm_03513	HslO	heat shock protein 33	Cytoplasmic	Protein fate	Protein modification and repair			x		21.8821	25.0687	24.41	20.7318	22.0536	NaN	NaN	20.5287	20.2479	8	13	9	3	5	1	1	2	2
CDIF630erm_03516	CDIF630erm_03516	N-acetyldiaminopimelate deacetylase	Cytoplasmic	Protein fate	Degradation of proteins, peptides, and glycopeptides					21.8378	21.3829	21.0622	NaN	21.1074	NaN	NaN	NaN	NaN	4	6	4	1	3	1	1	1	0
CDIF630erm_03517	SdaB	L-serine dehydratase	Cytoplasmic	Energy metabolism	Glycolysis/gluconeogenesis	x				23.4772	23.5735	22.3079	NaN	23.5537	19.988	21.4626	NaN	19.286	5	6	6	1	7	2	3	1	2
CDIF630erm_03518	DapA2	4-hydroxy-tetrahydrodipicolinate synthase	Cytoplasmic	Amino acid biosynthesis	Aspartate family				x	23.4449	22.5487	22.7302	NaN	21.4142	NaN	NaN	NaN	NaN	8	8	5	0	4	0	0	0	0
CDIF630erm_03520	Asd	aspartate-semialdehyde dehydrogenase	Cytoplasmic	Amino acid biosynthesis	Aspartate family	x	x			24.8343	26.0156	26.6346	19.4805	23.9606	18.5047	NaN	NaN	19.9375	13	14	10	1	8	2	1	0	3
CDIF630erm_03521	DapA3	4-hydroxy-tetrahydrodipicolinate synthase	Cytoplasmic	Amino acid biosynthesis	Aspartate family					25.4276	23.6352	22.9073	NaN	20.3945	NaN	NaN	NaN	NaN	7	8	6	0	6	1	1	1	1
CDIF630erm_03522	DapB1	4-hydroxy-tetrahydrodipicolinate reductase	Cytoplasmic	Amino acid biosynthesis	Aspartate family					23.5913	25.0392	23.5633	18.81	23.2222	NaN	18.8316	20.6097	19.0695	10	14	9	3	10	0	3	2	2
CDIF630erm_03523	DapH	2,3,4,5-tetrahydropyridine-2,6-dicarboxylate N-acetyltransferase	Cytoplasmic	Amino acid biosynthesis	Aspartate family		x			26.664	25.9565	25.1713	NaN	23.8473	21.5524	20.2411	22.251	21.2813	11	12	8	1	6	2	2	8	4
CDIF630erm_03525	DapB2	4-hydroxy-tetrahydrodipicolinate reductase	Cytoplasmic	Amino acid biosynthesis	Aspartate family	x				21.5446	21.762	21.2358	NaN	19.404	NaN	NaN	18.7004	NaN	3	5	3	0	3	0	1	2	1
CDIF630erm_03527	Hpt2	hypoxanthine phosphoribosyltransferase	Cytoplasmic	Purines, pyrimidines, nucleosides, and nucleotides	Salvage of nucleosides and nucleotides	x				21.6685	22.4866	22.5422	20.5076	22.5216	NaN	21.9571	NaN	NaN	4	5	6	2	6	0	2	1	1
CDIF630erm_03533	PrdF	proline racemase	Cytoplasmic	Amino acid biosynthesis	Other					26.5517	27.6512	26.564	24.9013	27.2466	24.5329	25.7663	24.4912	23.0533	18	19	18	13	18	8	11	10	6
CDIF630erm_03535	PrdE	proline reductase PrdE subunit	Cytoplasmic	Energy metabolism	Amino acids and amines					20.3727	21.0271	19.4795	NaN	19.6689	NaN	NaN	18.5498	NaN	3	4	2	0	2	0	0	2	0
CDIF630erm_03537	PrdB	proline reductase PrdB subunit	Cytoplasmic	Unknown function	Unknown function	x				27.8266	25.5401	25.3647	24.3685	25.9069	26.334	26.8135	25.6074	24.7543	7	7	5	4	7	3	4	4	4
CDIF630erm_03540	PrdA	D-proline reductase proprotein	Cytoplasmic	Energy metabolism	Amino acids and amines					29.0085	28.5143	28.1809	27.4886	28.3255	27.0751	27.7162	27.1331	27.4159	32	31	28	18	26	18	16	19	20
CDIF630erm_03544	PrdC	proline reductase PrdC subunit	Cytoplasmic	Energy metabolism	Electron transport					25.0098	25.3862	25.1143	21.1927	25.2969	22.5544	22.3005	21.5093	NaN	11	16	14	5	12	4	4	3	1
CDIF630erm_03547	CDIF630erm_03547	hypothetical protein	Unknown	Unknown function	Unknown function					NaN	19.6529	20.4519	NaN	19.8603	NaN	NaN	NaN	NaN	1	2	3	0	3	0	0	0	0
CDIF630erm_03550	FolC	folylpolyglutamate synthase	Cytoplasmic	Biosynthesis of cofactors, prosthetic groups, and carriers	Folic acid					18.935	NaN	18.968	NaN	NaN	NaN	NaN	NaN	NaN	4	1	2	0	0	0	0	1	0
CDIF630erm_03553	ValS	valine-tRNA ligase	Cytoplasmic	Protein synthesis	tRNA aminoacylation					27.9535	27.7667	27.4412	25.7122	27.6234	26.5533	26.3068	25.3295	25.9435	29	35	37	10	24	14	11	11	15
CDIF630erm_03569	CDIF630erm_03569	putative oligoendopeptidase f, M3B family	Cytoplasmic	Protein fate	Degradation of proteins, peptides, and glycopeptides	x				23.5193	21.3512	20.2629	NaN	22.4611	NaN	21.9815	21.6119	NaN	14	3	3	1	5	1	4	4	1
CDIF630erm_03581	ProC2	pyrroline-5-carboxylate reductase	Cytoplasmic	Amino acid biosynthesis	Glutamate family					21.2836	22.0769	22.2687	NaN	20.1635	NaN	NaN	NaN	NaN	3	3	4	1	2	1	0	1	0
CDIF630erm_03582	CDIF630erm_03582	putative 4-hydroxyproline dehydratase	Cytoplasmic	Energy metabolism	Anaerobic	x			x	21.6722	20.4052	21.7404	NaN	20.1526	NaN	NaN	NaN	NaN	5	4	2	0	3	1	0	0	0
CDIF630erm_03585	Pgi	glucose-6-phosphate isomerase	Cytoplasmic	Energy metabolism	Sugars	x				26.318	25.767	25.9293	23.9663	26.4043	25.8301	25.5919	24.4549	23.4437	17	17	16	10	14	11	11	9	7
CDIF630erm_03587	CDIF630erm_03587	putative oxidoreductase, FAD dependent	Cytoplasmic	Energy metabolism	Other					19.6981	21.1091	20.8991	NaN	20.6042	NaN	NaN	NaN	NaN	2	6	5	0	2	0	1	0	0
CDIF630erm_03601	EngB	GTP-binding protein EngB	Unknown	Protein synthesis	Other	x				20.1284	21.6653	21.4538	20.6224	22.9713	21.9931	22.1043	21.5433	21.2318	4	5	4	2	5	2	4	2	2
CDIF630erm_03602	Lon	ATP-dependent protease Lon	Cytoplasmic	Protein fate	Degradation of proteins, peptides, and glycopeptides					25.8132	25.4344	24.6701	26.1057	24.7354	25.4801	24.751	24.3134	23.9347	25	29	24	6	15	11	8	7	8
CDIF630erm_03605	ClpX	ATP-dependent clp protease ATP-binding subunit	Cytoplasmic	Protein fate	Degradation of proteins, peptides, and glycopeptides	x		x		26.0805	22.9267	24.235	21.0164	23.6227	21.7257	NaN	19.566	19.8337	18	12	12	3	10	2	1	3	2
CDIF630erm_03606	ClpP1	ATP-dependent clp protease proteolytic subunit	Cytoplasmic	Protein fate	Degradation of proteins, peptides, and glycopeptides					25.5215	24.3556	24.9117	23.3109	24.8479	23.5385	24.2741	23.302	24.2338	12	11	8	5	8	4	5	4	7
CDIF630erm_03607	Tig	trigger factor	Cytoplasmic	Protein fate	Protein folding and stabilization	x	x			30.0817	28.882	28.5289	26.7091	28.3506	26.3592	27.9129	27.0059	26.3745	37	34	33	17	32	15	22	19	15
CDIF630erm_03609	Rph	bifunctional tRNA nucleotidyltransferase/nucleoside- triphosphate diphosphatase	Cytoplasmic	Transcription	RNA processing					19.3892	20.8174	21.1384	NaN	20.5415	NaN	NaN	NaN	NaN	3	5	5	1	2	0	0	0	1
CDIF630erm_03611	CDIF630erm_03611	putative D-isomer specific 2-hydroxyacid dehydrogenase	Cytoplasmic	Energy metabolism	Other					17.1795	20.218	22.7851	NaN	19.0318	NaN	NaN	NaN	NaN	2	9	9	0	2	0	1	0	0
CDIF630erm_03612	CDIF630erm_03612	hypothetical protein	Cytoplasmic	Unknown function	Unknown function					19.7371	NaN	18.9293	NaN	18.9435	NaN	NaN	NaN	NaN	3	0	2	0	2	1	0	0	0
CDIF630erm_03632	CDIF630erm_03632	transcriptional regulator, HTH-type Tn916-like,CTn6	Cytoplasmic	Regulatory functions	DNA interactions					NaN	NaN	NaN	NaN	20.6107	NaN	NaN	22.2457	23.0413	1	1	1	1	2	1	1	2	2
CDIF630erm_03636	CDIF630erm_03636	putative conjugative transposon protein Tn916-like, CTn6	Cytoplasmic	Mobile and extrachromosomal element functions	Transposon functions					NaN	20.5204	21.6814	NaN	21.1811	NaN	NaN	NaN	NaN	1	3	3	0	3	0	0	0	0
CDIF630erm_03648	CDIF630erm_03648	beta-lactamase-like protein	Unknown	Unknown function	Enzymes of unknown specificity				x	19.8358	20.9669	21.3198	NaN	NaN	NaN	NaN	NaN	NaN	3	5	4	0	1	0	0	0	0
CDIF630erm_03657	CDIF630erm_03657	putative protease/amidase	Cytoplasmic	Protein fate	Degradation of proteins, peptides, and glycopeptides					NaN	19.529	20.0378	NaN	NaN	NaN	NaN	NaN	NaN	0	2	2	0	1	0	0	0	1
CDIF630erm_03677	MgtA1	magnesium-transporting ATPase, P-type 1, Tn916-like, CTn7	CytoplasmicMembrane	Transport and binding proteins	Cations and iron carrying compounds	x				26.687	28.2593	27.9762	28.7263	27.9647	27.363	27.8699	29.3948	29.2822	20	26	25	22	21	21	16	25	27
CDIF630erm_03680	CDIF630erm_03680	putative transcriptional regulator Tn916-like, CTn7	Cytoplasmic	Signal transduction	Two-component systems		x			NaN	18.5005	19.2153	21.7489	19.8923	NaN	22.4382	20.7523	21.2668	1	3	3	3	3	0	2	3	3
CDIF630erm_03699	Pyk	pyruvate kinase	Cytoplasmic	Energy metabolism	Glycolysis/gluconeogenesis	x	x			30.6971	30.8586	30.7957	29.024	29.6278	28.7714	29.7013	28.0685	28.7296	28	30	29	18	24	23	20	21	20
CDIF630erm_03700	PfkA	ATP-dependent 6-phosphofructokinase	Cytoplasmic	Energy metabolism	Glycolysis/gluconeogenesis					27.5922	26.0537	26.1051	23.7862	26.0796	23.7833	25.194	24.6526	22.313	10	10	9	5	8	5	5	5	4
CDIF630erm_03703	CDIF630erm_03703	putative hydrolase, NUDIX family	Cytoplasmic	DNA metabolism	DNA replication, recombination, and repair					20.9963	21.0789	20.5613	NaN	22.479	NaN	22.3381	21.4113	20.5529	6	6	6	0	6	0	2	3	3
CDIF630erm_03706	CDIF630erm_03706	putative phosphatase	Cytoplasmic	Energy metabolism	Other					NaN	NaN	NaN	19.9809	NaN	NaN	20.3674	21.302	19.9763	0	0	1	2	1	1	2	2	2
CDIF630erm_03707	MurB	UDP-N-acetylenolpyruvoylglucosamine reductase	Cytoplasmic	Cell envelope	Biosynthesis and degradation of murein sacculus and peptidoglycan	x				21.4763	22.279	22.6808	NaN	20.8927	NaN	NaN	NaN	20.0394	6	5	6	0	5	0	0	1	5
CDIF630erm_03710	CDIF630erm_03710	hydrogenase (NADP+, ferredoxin), NADPH-binding subunit	Cytoplasmic	Energy metabolism	Electron transport	x				22.0721	23.9936	24.5231	NaN	23.1695	NaN	NaN	NaN	NaN	5	9	7	1	5	0	0	1	1
CDIF630erm_03712	CDIF630erm_03712	hydrogenase (NADP+, ferredoxin), iron hydrogenase subunit	Cytoplasmic	Energy metabolism	Electron transport	x				18.0536	NaN	19.9196	NaN	NaN	NaN	NaN	NaN	NaN	2	0	3	0	1	0	0	0	0
CDIF630erm_03714	HprK	PTS system, HPr kinase/phosphorylase	Cytoplasmic	Signal transduction	PTS	x				21.1041	21.3727	20.6598	NaN	20.1845	18.6037	NaN	19.0185	NaN	5	6	3	1	2	3	1	2	0
CDIF630erm_03716	UvrA	excinuclease ABC subunit A	Cytoplasmic	DNA metabolism	DNA replication, recombination, and repair	x		x		NaN	NaN	20.4981	22.9874	22.1972	22.3291	21.361	21.7721	21.7953	1	1	2	8	3	7	3	3	4
CDIF630erm_03717	UvrB	excinuclease ABC subunit B	Cytoplasmic	DNA metabolism	DNA replication, recombination, and repair	x				19.7031	19.1351	NaN	NaN	NaN	NaN	NaN	NaN	NaN	3	3	1	0	0	0	0	0	0
CDIF630erm_03727	HemB	delta-aminolevulinic acid dehydratase	Cytoplasmic	Biosynthesis of cofactors, prosthetic	Heme, porphyrin, and cobalamin	x				24.7298	23.4105	23.6206	NaN	23.7247	NaN	21.6253	20.3764	NaN	12	6	9	0	7	1	3	2	1
CDIF630erm_03728	CobA-hemD	bifunctional uroporphyrinogen-III methyltransferase/uroporphyrinogen-III synthase	Unknown	Biosynthesis of cofactors, prosthetic groups, and carriers	Heme, porphyrin, and cobalamin	x				21.0083	20.37	21.7436	20.2862	20.9264	20.8855	21.1346	NaN	NaN	3	3	4	3	3	3	3	2	1
CDIF630erm_03730	CbiKP	sirohydrochlorin cobaltochelatase CbiKP	Cytoplasmic	Biosynthesis of cofactors, prosthetic groups, and carriers	Heme, porphyrin, and cobalamin		x			22.6294	22.4051	22.1611	19.9944	22.0613	20.4683	NaN	NaN	20.8703	7	6	7	2	5	2	1	1	2
CDIF630erm_03732	CbiH	cobalt-factor III methyltransferase	Cytoplasmic	Biosynthesis of cofactors, prosthetic groups, and carriers	Heme, porphyrin, and cobalamin					20.5955	22.4471	22.909	NaN	20.9804	NaN	NaN	NaN	NaN	4	4	4	1	4	1	1	0	1
CDIF630erm_03734	CbiF	cobalt-precorrin-4 methyltransferase	Unknown	Biosynthesis of cofactors, prosthetic groups, and carriers	Heme, porphyrin, and cobalamin					20.5798	21.6778	21.4159	NaN	19.8267	NaN	NaN	NaN	NaN	3	7	6	0	4	1	1	0	0
CDIF630erm_03742	CbiA	cobyrinic acid A,C-diamide synthase	Cytoplasmic	Biosynthesis of cofactors, prosthetic groups, and carriers	Heme, porphyrin, and cobalamin					17.5561	NaN	18.4918	NaN	NaN	NaN	NaN	NaN	NaN	2	3	2	0	1	0	0	0	0
CDIF630erm_03748	CobT	nicotinate-nucleotide-dimethylbenzimidazole phosphoribosyltransferase	Cytoplasmic	Biosynthesis of cofactors, prosthetic groups, and carriers	Heme, porphyrin, and cobalamin	x			x	20.6039	20.9791	20.3685	NaN	19.4628	NaN	NaN	NaN	NaN	2	5	4	0	3	0	0	0	0
CDIF630erm_03751	CDIF630erm_03751	putative glycoside hydrolase-type carbohydrate-binding protein	Unknown	Energy metabolism	Sugars	x				20.9755	22.701	23.205	NaN	20.0479	NaN	NaN	NaN	NaN	4	4	4	0	3	1	0	0	1
CDIF630erm_03763	CDIF630erm_03763	transcriptional regulator, GntR family	Cytoplasmic	Regulatory functions	DNA interactions					NaN	NaN	NaN	20.5371	NaN	NaN	19.7833	19.5494	21.3479	1	2	2	3	1	1	2	2	3
CDIF630erm_03770	Tkt'2	transketolase, C-terminal section	Unknown	Energy metabolism	Pentose phosphate pathway	x				22.1801	22.2452	22.9948	NaN	NaN	NaN	NaN	NaN	NaN	3	6	3	1	1	1	0	1	0
CDIF630erm_03771	Tkt2	transketolase, N-terminal section	Cytoplasmic	Energy metabolism	Pentose phosphate pathway					20.1594	20.4469	19.7103	NaN	20.6553	NaN	NaN	NaN	NaN	4	3	3	0	2	0	0	1	0
CDIF630erm_03774	Alr	alanine racemase	Cytoplasmic	Cell envelope	Biosynthesis and degradation of murein sacculus and peptidoglycan					23.1871	22.1443	22.1236	20.6187	23.3961	NaN	21.2759	21.8413	19.7517	12	9	10	3	10	0	5	3	3
CDIF630erm_03776	CDIF630erm_03776	putative CBS domain protein	Cytoplasmic	Transcription	Transcription factors					21.1579	20.7647	20.8253	NaN	20.6097	NaN	NaN	NaN	NaN	4	5	4	0	2	1	1	1	1
CDIF630erm_03778	AtpC2	ATP hydrolase subunit epsilon	Unknown	Energy metabolism	ATP-proton motive force interconversion		x	x		20.6431	22.4392	21.9639	24.0236	23.3224	23.1852	26.3102	27.4468	26.8436	2	3	3	3	4	3	3	6	5
CDIF630erm_03779	AtpD2	ATP synthase subunit beta	CytoplasmicMembrane	Energy metabolism	ATP-proton motive force interconversion		x			27.5858	26.5024	26.8096	30.8932	29.9845	31.0263	30.627	30.9819	30.8914	23	23	21	30	32	27	34	34	33
CDIF630erm_03780	AtpG	ATP synthase subunit gamma	Cytoplasmic	Energy metabolism	ATP-proton motive force interconversion		x			21.7574	24.4764	24.454	27.7862	26.3936	26.8931	26.3539	27.9768	28.3641	6	7	7	15	14	15	9	18	19
CDIF630erm_03781	AtpA2	ATP synthase subunit alpha	Cytoplasmic	Energy metabolism	ATP-proton motive force interconversion		x			26.712	25.6489	26.0964	31.6663	28.505	30.849	31.0239	31.2395	32.126	24	19	20	33	26	37	28	33	34
CDIF630erm_03782	AtpH	ATP synthase subunit delta	Cytoplasmic	Energy metabolism	ATP-proton motive force interconversion	x	x			19.1347	17.7765	18.5843	26.0602	24.807	26.6679	26.0366	27.4222	28.2824	4	3	4	9	9	5	7	10	13
CDIF630erm_03783	AtpF2	ATP synthase subunit b	CytoplasmicMembrane	Energy metabolism	ATP-proton motive force interconversion		x	x		NaN	18.2199	17.7695	19.3828	NaN	20.2521	NaN	23.0499	24.9785	1	4	2	2	1	2	1	6	6
CDIF630erm_03788	ComEB2	deoxycytidylate deaminase	Cytoplasmic	Purines, pyrimidines, nucleosides, and nucleotides	2'-Deoxyribonucleotide metabolism	x				22.7502	23.2811	23.2232	NaN	22.5394	NaN	NaN	NaN	NaN	4	4	3	1	3	0	0	1	1
CDIF630erm_03790	Upp	uracil phosphoribosyltransferase	Cytoplasmic	Purines, pyrimidines, nucleosides, and nucleotides	Salvage of nucleosides and nucleotides					23.35	23.6556	23.6114	21.2787	23.0424	NaN	NaN	22.0351	22.1939	7	7	5	2	6	1	1	3	4
CDIF630erm_03791	RpiB2	ribose-5-phosphate isomerase	Cytoplasmic	Energy metabolism	Pentose phosphate pathway					25.1111	24.5983	24.3494	NaN	24.852	NaN	NaN	NaN	NaN	3	3	3	1	3	0	1	1	1
CDIF630erm_03792	YwlE	protein-arginine-phosphatase	Cytoplasmic	Protein fate	Protein modification and repair	x				18.85	21.1519	21.0699	NaN	19.322	NaN	NaN	NaN	NaN	2	6	5	0	4	0	0	1	0
CDIF630erm_03793	YwlC	threonylcarbamoyl-AMP synthase	Cytoplasmic	Protein synthesis	tRNA and rRNA base modification	x			x	21.061	19.1414	18.8624	NaN	18.5908	NaN	NaN	NaN	NaN	4	2	4	0	2	0	0	0	0
CDIF630erm_03795	PrfA	peptide chain release factor 1	Cytoplasmic	Protein synthesis	Translation factors	x				25.4911	24.9607	26.199	22.6266	25.8112	22.9529	23.2748	21.1309	19.7204	18	19	23	5	18	2	6	4	2
CDIF630erm_03799	Rho	transcription termination factor Rho	Cytoplasmic	Transcription	Transcription factors	x				21.7973	21.7056	20.8903	22.1123	21.9891	21.7261	20.5504	22.345	19.8913	10	8	8	9	5	6	2	6	3
CDIF630erm_03804	GppA	guanosine-5'-triphosphate, 3'-diphosphate pyrophosphatase	Cytoplasmic	Central intermediary metabolism	Phosphorus compounds					21.5144	21.6044	21.7515	NaN	21.2892	NaN	NaN	NaN	NaN	4	4	6	1	2	1	1	1	1
CDIF630erm_03809	HupA	non-specific DNA-binding protein	Cytoplasmic	DNA metabolism	Chromosome-associated proteins					24.4517	21.3784	NaN	NaN	21.5792	NaN	NaN	25.0397	25.3651	7	4	1	1	3	1	0	3	4
CDIF630erm_03813	PrsA2	peptidyl-prolyl cis-trans isomerase, PpiC-type	CytoplasmicMembrane	Protein fate	Protein folding and stabilization	x				21.4918	NaN	16.7758	23.1791	19.0835	20.9366	19.9809	24.2971	21.9805	2	1	3	8	5	6	5	12	8
CDIF630erm_03814	Mfd	transcription-repair coupling factor	Cytoplasmic	DNA metabolism	DNA replication, recombination, and repair					21.7593	21.7404	21.8268	21.5822	NaN	NaN	NaN	NaN	20.9214	5	9	7	3	2	0	1	0	2
CDIF630erm_03815	Pth	peptidyl-tRNA hydrolase	Cytoplasmic	Protein synthesis	Other					20.2213	21.9798	22.2753	NaN	22.2585	NaN	NaN	NaN	NaN	3	6	5	0	5	0	1	1	1
CDIF630erm_03826	CDIF630erm_03826	putative pilin protein	CytoplasmicMembrane	Protein fate	Protein and peptide secretion and trafficking	x	x	x		19.4072	NaN	19.4556	21.8109	21.7797	NaN	NaN	23.1317	22.8249	2	0	3	2	3	1	1	3	4
CDIF630erm_03828	Prs	ribose-phosphate pyrophosphokinase	Cytoplasmic	Purines, pyrimidines, nucleosides, and nucleotides	Purine ribonucleotide biosynthesis	x		x		25.2471	27.262	27.4924	21.0024	24.126	NaN	NaN	19.7018	19.3504	12	13	11	3	11	1	1	3	3
CDIF630erm_03829	GlmU	bifunctional N-acetylglucosamine-1-phosphate uridyltransferase/glucosamine-1-phosphate N-acetyltransferase	Cytoplasmic	Central intermediary metabolism	Amino sugars			x		22.2984	24.2313	24.4623	19.3989	23.1372	20.1138	17.7223	17.142	17.6273	10	16	12	4	9	4	2	2	2
CDIF630erm_03831	PurR	transcriptional regulator, purine operon repressor	Cytoplasmic	Regulatory functions	DNA interactions					20.3706	23.329	23.5752	NaN	19.5404	NaN	NaN	NaN	18.8425	6	7	7	1	5	1	1	1	3
CDIF630erm_03832	MurC	UDP-N-acetylmuramate-L-alanine ligase	Cytoplasmic	Cell envelope	Biosynthesis and degradation of murein sacculus and peptidoglycan					22.4885	24.2733	24.3888	NaN	22.8988	20.5316	NaN	NaN	18.5997	9	15	16	1	8	3	1	1	2
CDIF630erm_03835	PepT2	peptidase T	Cytoplasmic	Protein fate	Degradation of proteins, peptides, and glycopeptides					24.1748	21.4419	21.9428	18.9798	21.0653	NaN	NaN	NaN	19.5782	13	6	8	2	6	1	0	1	2
CDIF630erm_03837	RsmA	ribosomal RNA small subunit methyltransferase A	Cytoplasmic	Protein synthesis	tRNA and rRNA base modification					21.3552	19.1535	21.7082	NaN	19.7459	NaN	NaN	NaN	NaN	4	4	4	0	2	0	0	0	1
CDIF630erm_03839	CDIF630erm_03839	ABC-type transport system, iron-family extracellular solute-binding protein	CytoplasmicMembrane	Transport and binding proteins	Amino acids, peptides and amines		x	x		23.4133	19.5854	19.6488	23.8815	24.5416	23.5041	25.4265	26.2313	25.3575	10	4	6	8	8	7	9	10	9
CDIF630erm_03841	CDIF630erm_03841	ABC-type transport system, iron-family ATP-binding protein	CytoplasmicMembrane	Transport and binding proteins	Cations and iron carrying compounds	x				17.9743	NaN	18.1007	22.9695	21.2076	20.8398	21.5431	22.6574	22.513	2	1	2	5	3	2	2	4	3
CDIF630erm_03853	CDIF630erm_03853	putative deoxyribonuclease	Cytoplasmic	Unknown function	Enzymes of unknown specificity					21.3612	19.7675	20.2139	NaN	19.8104	NaN	NaN	NaN	NaN	3	3	2	0	2	0	0	1	0
CDIF630erm_03854	MetG	methionine-tRNA ligase	Cytoplasmic	Protein synthesis	tRNA aminoacylation		x	x		28.363	28.6227	27.9575	25.6762	27.2013	26.3207	25.535	24.8233	25.1986	28	33	30	8	22	19	9	10	15
CDIF630erm_03858	PncB	nicotinate phosphoribosyltransferase	Cytoplasmic	Biosynthesis of cofactors, prosthetic groups, and carriers	Pyridine nucleotides	x				NaN	21.597	22.2975	NaN	21.6465	NaN	NaN	NaN	NaN	3	6	7	0	3	1	0	0	1
CDIF630erm_03859	CDIF630erm_03859	transcriptional regulator, AsnC/lrp family	Cytoplasmic	Regulatory functions	DNA interactions					24.7857	22.6153	22.6997	20.5599	23.2922	22.5965	22.4686	21.8112	21.6985	8	7	6	2	7	3	2	5	6
CDIF630erm_03863	CDIF630erm_03863	putative YaaT-like protein involved in sporulation or related to DNA replication	Cytoplasmic	Protein fate	Protein and peptide secretion and trafficking					21.275	24.079	24.277	NaN	20.593	NaN	NaN	NaN	NaN	7	11	7	1	3	0	1	1	1
CDIF630erm_03872	LysS	lysine-tRNA ligase	Cytoplasmic	Protein synthesis	tRNA aminoacylation	x	x			25.8141	26.0919	26.2631	24.132	25.2999	23.3214	23.8837	24.6069	24.3336	16	25	20	4	18	5	4	8	7
CDIF630erm_03873	GreA	transcription elongation factor	Cytoplasmic	Transcription	Transcription factors					23.4029	23.5601	23.852	20.9606	23.2141	NaN	23.2517	24.8559	23.9733	9	8	9	2	9	1	3	4	5
CDIF630erm_03875	CoaX	type III pantothenate kinase	Cytoplasmic	Biosynthesis of cofactors, prosthetic groups, and carriers	Pantothenate and coenzyme A					22.061	24.0844	24.3568	NaN	22.29	NaN	NaN	19.9103	21.9614	5	7	6	0	6	0	1	2	3
CDIF630erm_03877	CDIF630erm_03877	putative peptidase	Cytoplasmic	Protein fate	Degradation of proteins, peptides, and glycopeptides					18.7973	20.5567	19.5573	NaN	NaN	NaN	NaN	NaN	NaN	3	3	4	2	2	1	2	0	1
CDIF630erm_03879	FtsH2	cell division protease FtsH2	CytoplasmicMembrane	Protein fate	Degradation of proteins, peptides, and glycopeptides		x			21.1193	20.7967	19.9091	25.911	24.8668	24.6648	24.4232	27.5323	27.3076	4	5	3	6	7	5	7	19	24
CDIF630erm_03881	CDIF630erm_03881	putative calycin	Unknown	Unknown function	Unknown function					20.4899	21.7706	22.0126	21.511	21.8823	22.0851	20.4604	NaN	NaN	6	6	4	2	3	2	2	1	1
CDIF630erm_03882	MurI	glutamate racemase	Cytoplasmic	Cell envelope	Biosynthesis and degradation of murein sacculus and peptidoglycan				x	18.8708	20.3975	19.8543	NaN	19.6811	NaN	NaN	NaN	NaN	3	4	3	0	3	0	0	0	0
CDIF630erm_03890	CDIF630erm_03890	membrane dipeptidase	Cytoplasmic	Protein fate	Degradation of proteins, peptides, and glycopeptides					22.1592	20.7989	21.5336	NaN	20.5367	NaN	NaN	NaN	NaN	5	5	5	1	3	0	0	0	1
CDIF630erm_03892	CDIF630erm_03892	protein translocase, SecA-like	Cytoplasmic	Unknown function	Unknown function					25.0474	24.3243	23.6339	24.1023	23.671	23.6641	NaN	24.5435	23.5071	7	8	8	3	8	2	1	5	6
CDIF630erm_03902	CDIF630erm_03902	putative methyltransferase	Cytoplasmic	Unknown function	Unknown function				x	20.8259	20.5316	20.5623	NaN	20.2303	NaN	NaN	NaN	NaN	3	3	2	0	2	0	0	0	0
CDIF630erm_03910	CarB1	carbamoyl-phosphate synthase large subunit	Cytoplasmic	Purines, pyrimidines, nucleosides, and nucleotides	Pyrimidine ribonucleotide biosynthesis					24.3629	24.3891	25.8038	NaN	23.4583	NaN	NaN	19.8421	19.9461	7	15	18	1	5	0	0	2	2
CDIF630erm_03911	CarA1	carbamoyl-phosphate synthase small subunit	Cytoplasmic	Purines, pyrimidines, nucleosides, and nucleotides	Pyrimidine ribonucleotide biosynthesis	x				20.874	22.1309	23.3288	NaN	22.2642	NaN	NaN	NaN	NaN	6	5	5	0	5	0	1	0	0
CDIF630erm_03917	CDIF630erm_03917	aminopeptidase 2	Cytoplasmic	Protein fate	Degradation of proteins, peptides, and glycopeptides					24.2859	21.6687	21.5913	NaN	21.4473	NaN	NaN	17.5791	18.1771	10	5	5	0	3	1	0	2	2
CDIF630erm_03920	LuxS	S-ribosylhomocysteine lyase	Cytoplasmic	Signal transduction	Other					23.5515	23.4618	22.6771	NaN	20.8873	NaN	NaN	NaN	21.2591	5	4	3	1	2	1	0	1	2
CDIF630erm_03930	CDIF630erm_03930	putative iron-sulfur assembly protein	Cytoplasmic	Energy metabolism	Electron transport				x	21.2285	22.5393	22.1786	NaN	NaN	NaN	NaN	NaN	NaN	5	6	5	0	1	0	0	0	0
CDIF630erm_03931	CDIF630erm_03931	ABC-type transport system, ATP-binding protein	CytoplasmicMembrane	Transport and binding proteins	Cations and iron carrying compounds					22.5763	24.0604	23.4725	NaN	21.7236	NaN	NaN	20.4015	NaN	6	8	7	1	6	1	1	2	1
CDIF630erm_03933	CDIF630erm_03933	uncharacterized protein, glyoxalase-like	Unknown	Cellular processes	Detoxification					19.1139	16.9622	NaN	NaN	NaN	NaN	NaN	NaN	NaN	3	2	1	0	0	0	0	0	0
CDIF630erm_03941	CDIF630erm_03941	putative metal-containing protein	Unknown	Unknown function	Unknown function					20.7481	22.3083	NaN	NaN	NaN	NaN	NaN	NaN	NaN	2	3	1	0	1	0	0	0	0
CDIF630erm_03942	CDIF630erm_03942	putative N-acetyltransferase YjaB	Cytoplasmic	Protein fate	Protein modification and repair	x				23.8919	23.6633	23.3162	23.3193	24.3012	NaN	NaN	22.3035	23.7006	8	10	10	2	9	1	1	5	4
CDIF630erm_03945	PhnA	phosphonoacetate hydrolase	Unknown	Unknown function	Unknown function					NaN	21.0657	21.0969	NaN	19.7076	NaN	NaN	20.7435	NaN	0	2	2	0	2	0	0	2	0
CDIF630erm_03948	CDIF630erm_03948	putative signaling protein	CytoplasmicMembrane	Signal transduction	Other					NaN	20.1958	22.1722	NaN	NaN	NaN	NaN	NaN	NaN	3	2	2	1	1	1	1	1	1
CDIF630erm_03970	CDIF630erm_03970	transcriptional regulator, GntR family	Cytoplasmic	Regulatory functions	DNA interactions					18.2246	17.4346	17.7227	21.268	18.1079	NaN	NaN	NaN	20.4592	2	2	2	2	2	0	1	1	2
CDIF630erm_03983	PurA	adenylosuccinate synthetase	Cytoplasmic	Purines, pyrimidines, nucleosides, and nucleotides	Purine ribonucleotide biosynthesis	x	x	x		23.5199	25.1707	24.9202	20.1005	23.4145	20.7501	19.8129	19.857	19.5967	11	13	12	3	10	3	3	2	3
CDIF630erm_03984	CDIF630erm_03984	hypothetical protein	Cytoplasmic	Unknown function	Unknown function					20.2936	21.3768	21.702	NaN	19.6806	NaN	NaN	NaN	NaN	3	3	3	0	2	0	0	0	1
CDIF630erm_03986	RplI	50S ribosomal protein L9	Cytoplasmic	Protein synthesis	Ribosomal proteins: synthesis and modification	x				24.2087	23.7419	23.1645	24.3073	24.8767	NaN	23.15	24.9109	24.0086	8	10	9	7	11	0	4	10	7
CDIF630erm_03987	CDIF630erm_03987	putative signal transduction phosphoesterase	Cytoplasmic	Signal transduction	Other	x				NaN	NaN	20.3247	22.6959	23.0304	22.3539	NaN	20.7856	NaN	0	0	2	4	2	3	1	2	1
CDIF630erm_03990	RpsR	30S ribosomal protein S18	Cytoplasmic	Protein synthesis	Ribosomal proteins: synthesis and modification	x				25.1451	26.1828	26.3065	NaN	24.729	NaN	NaN	NaN	24.7349	3	3	2	1	2	0	0	1	2
CDIF630erm_03991	Ssb2	single-stranded DNA-binding protein	Cytoplasmic	DNA metabolism	DNA replication, recombination, and repair					25.1625	26.1165	25.7531	25.8344	25.9846	26.2182	26.2406	25.4578	24.2848	8	11	9	8	9	6	5	7	5
CDIF630erm_03992	RpsF	30S ribosomal protein S6	Cytoplasmic	Protein synthesis	Ribosomal proteins: synthesis and modification					26.0828	24.4541	24.8815	24.6335	26.3615	22.9805	23.2701	25.9264	26.5534	12	10	8	4	9	2	3	6	6
CDIF630erm_03993	CDIF630erm_03993	aromatic-amino-acid aminotransferase	Cytoplasmic	Regulatory functions	Other		x			27.7631	26.9445	27.077	22.4262	25.7567	21.8081	21.5761	22.9628	22.4367	19	19	20	5	17	5	3	6	6
CDIF630erm_03994	CDIF630erm_03994	hypothetical protein	Cytoplasmic	Unknown function	Unknown function					21.0962	21.2382	NaN	NaN	NaN	NaN	NaN	NaN	NaN	2	2	1	0	1	0	0	0	0
CDIF630erm_03995	CDIF630erm_03995	hypothetical protein	Cytoplasmic	Unknown function	Unknown function					22.7859	24.344	25.2078	22.0833	23.4142	20.8312	NaN	21.9274	21.8169	6	6	4	2	3	2	1	2	3
CDIF630erm_03996	YedF	selenium metabolism protein YedF	Unknown	Unknown function	Unknown function		x			25.5323	25.121	24.8021	20.9704	23.9983	22.6031	23.7401	22.1832	22.0101	12	8	6	3	4	2	5	3	2
CDIF630erm_03997	CDIF630erm_03997	transcriptional regulator, TPR family	Cytoplasmic	Regulatory functions	DNA interactions		x			23.5795	23.2671	23.2286	NaN	21.5232	20.435	NaN	NaN	NaN	8	9	12	2	7	7	0	1	1
CDIF630erm_03998	CDIF630erm_03998	putative exported protein	Unknown	Unknown function	Unknown function	x				24.0818	23.6512	24.1161	23.6168	23.9794	22.2881	23.7079	24.8402	25.6334	6	8	7	6	7	3	4	7	7
CDIF630erm_03999	SufS2	putative cysteine desulfurase	Cytoplasmic	Unknown function	Enzymes of unknown specificity	x				NaN	19.5543	20.3405	NaN	19.7486	NaN	NaN	NaN	NaN	1	3	2	0	2	0	0	0	0
CDIF630erm_04005	MnmG	tRNA uridine 5-carboxymethylaminomethyl modification enzyme	Cytoplasmic	Protein synthesis	tRNA and rRNA base modification	x	x			23.7641	25.1037	24.7253	20.0944	20.3194	19.796	NaN	NaN	NaN	10	18	14	2	10	3	0	1	0
CDIF630erm_04006	MnmE	transfer RNA modification GTPase MnmE	Cytoplasmic	Protein synthesis	tRNA and rRNA base modification	x				21.0431	21.286	21.7435	NaN	19.7784	NaN	NaN	NaN	NaN	7	7	5	0	4	0	1	0	0
CDIF630erm_04007	Jag	putative SpoIIIJ-associated RNA/ssDNA-binding protein Jag	Cytoplasmic	Cellular processes	Sporulation and germination	x	x			19.8325	NaN	19.0911	21.7567	NaN	21.2529	19.6546	20.5605	23.4399	5	0	2	3	2	2	2	3	9
CDIF630erm_04008	YidC	membrane protein insertase YidC	CytoplasmicMembrane	Protein fate	Protein and peptide secretion and trafficking		x			21.2533	20.5748	20.6843	24.8453	22.0981	23.3909	23.3369	26.2623	24.6083	3	3	3	4	4	5	3	4	4
CDIF630erm_04114	TetM	tetracycline resistance protein Tn5397	Cytoplasmic	Unknown function	Unknown function	x	x	x		26.9131	28.0006	28.116	24.148	26.1765	24.406	23.7011	23.0933	23.6806	24	30	30	6	19	12	6	9	7
