# Supplementary material for: Proteomic Adaptation of Clostridioides difficile to Treatment with the Antimicrobial Peptide Nisin
Source: Cells. 2021 Feb 11;10(2):372. doi: 10.3390/cells10020372 (PMC7918085; doi:10.3390/cells10020372)
Supplement: Supplementary file 1 [file cells-10-00372-s001.zip › Supplemental Table S2.xlsx]

## Sheet: Membrane
Table S2: Accession numbers, names, and function are provided for the proteins quantified in the membrane fraction together with information on the predicted subcellular localization (prediction by pSortB) and functional roles according to TIGR (TIGR Roles as assigned to C. difficle 630). Statisitical significance in the time course experiment (ANOVA, p<0.01) or in t-test (p<0.01) comparing only …
Accession Number	Protein Name	Function	predicted localization	TIGR Role	TIGR Subrole	ANOVA significant	t-test 90 min vs Ctrl significant	t-test 180 min vs 90 min significant	On/Off	log2- LFQ intensity Ctrl_A	log2- LFQ intensity Ctrl_B	log2- LFQ intensity Ctrl_C	log2- LFQ intensity 90 min_A	log2- LFQ intensity 90 min_B	log2- LFQ intensity 90 min_C	log2- LFQ intensity 180 min_A	log2- LFQ intensity 180 min_B	log2- LFQ intensity 180 min_C	iBAQ Crtl_A	iBAQ Crtl_B	iBAQ Crtl_C	iBAQ 90 min_A	iBAQ 90 min_B	iBAQ 90 min_C	iBAQ 180 min_A	iBAQ 180 min_B	iBAQ 180 min_C	Unique peptides Ctrl_A	Unique peptides Ctrl_B	Unique peptides Ctrl_C	Unique peptides 90 min_A	Unique peptides 90 min_B	Unique peptides 90 min_C	Unique peptides 180 min_A	Unique peptides 180 min_B	Unique peptides 180 min_C
CDIF630erm_00001	DnaA	chromosomal replication initiator protein	Cytoplasmic	DNA metabolism	DNA replication, recombination, and repair	x	x			31.5004	31.3064	31.0696	31.9705	31.7735	31.6073	31.6555	31.7632	32.3345	71451200	96912070	49719830	120137200	78238620	107865000	49203200	79280520	89822820	34	38	31	32	31	28	19	22	26
CDIF630erm_00002	DnaN	DNA polymerase III subunit beta	Cytoplasmic	DNA metabolism	DNA replication, recombination, and repair					28.3307	27.9754	29.2081	28.408	28.6801	28.5157	28.8391	28.1598	28.7738	4673200	6425781	11841670	7631430	10338640	10941990	9093792	4689810	6210917	13	12	15	13	12	13	9	9	8
CDIF630erm_00004	RecF	DNA replication and repair protein RecF	Cytoplasmic	DNA metabolism	DNA replication, recombination, and repair	x	x			27.0654	25.8222	25.4288	27.8585	27.7987	27.7688	27.9444	26.4908	27.6144	-1652400	-4800848	-5678596	1196425	4527848	6977443	-1030249	-588754	-827280	9	5	5	10	10	9	4	3	3
CDIF630erm_00005	GyrB	DNA gyrase subunit B	Cytoplasmic	DNA metabolism	DNA replication, recombination, and repair	x	x			28.8646	28.7853	28.8907	30.0299	30.0097	29.3981	30.5883	29.8506	30.0251	-246700	2322937	-114288	16947840	13342720	9740033	8226518	25610310	22269200	19	19	16	23	23	18	6	10	14
CDIF630erm_00006	GyrA	DNA gyrase subunit A	Cytoplasmic	DNA metabolism	DNA replication, recombination, and repair	x	x			30.105	30.153	29.7412	30.8024	30.6715	31.2192	30.6168	31.0148	30.62	-1365200	6037786	582576	32180740	18737340	20637050	12050150	30481390	7190979	29	29	28	37	32	25	17	20	16
CDIF630erm_00007	CDIF630erm_00007	putative spore protein	CytoplasmicMembrane	Hypothetical proteins	Domain					32.2677	31.8005	31.9566	32.7039	31.6647	31.3469	29.8389	31.4687	30.4975	342934200	299825400	295865600	630922600	469567000	340466100	51272650	262384300	106507900	8	8	8	10	11	8	3	5	4
CDIF630erm_00008	CDIF630erm_00008	hypothetical protein	CytoplasmicMembrane	Unknown function	Unknown function					32.826	32.5843	31.8098	32.7338	31.1882	33.1325	30.6012	31.708	28.3452	159144200	116749400	79719100	177575100	238088900	425846900	35180150	59989060	5983188	4	5	5	5	5	5	3	2	2
CDIF630erm_00009	RsbV	anti-sigma factor antagonist	Unknown	Regulatory functions	Protein interactions				x	27.6472	27.3535	26.4438	24.767	NaN	25.8979	NaN	NaN	NaN	2139100	-1958313	-1330695	-5730294	-6169907	-3714791	-5713621	-5848637	-5912021	6	4	5	2	1	3	0	0	0
CDIF630erm_00010	RsbW	serine-protein kinase RsbW	Cytoplasmic	Regulatory functions	Protein interactions					25.9225	26.4203	26.9129	26.0858	26.2851	26.5332	NaN	NaN	NaN	-4557700	-3615213	-4079641	-4383138	-4198332	-3122737	-5713621	-5848637	-5098738	4	4	4	4	2	4	0	0	1
CDIF630erm_00021	NiaR	transcription repressor NiaR	Cytoplasmic	Regulatory functions	Small molecule interactions		x		x	27.1841	26.7243	27.2385	25.4018	25.2294	NaN	NaN	NaN	NaN	1031200	549385	-2173633	-5103915	-5892123	-6456996	-5713621	-5848637	-5912021	5	5	5	2	2	0	0	0	0
CDIF630erm_00022	MscS	small-conductance mechanosensitive channel	CytoplasmicMembrane	Signal transduction	Other		x			26.2941	26.385	26.7103	26.7489	26.8985	26.9906	26.5861	NaN	NaN	-2089500	-2687630	1121873	-2610116	1356418	638162	4588123	-3566426	-1585612	4	3	3	3	3	3	3	1	2
CDIF630erm_00024	SerS1	serine-tRNA ligase	Cytoplasmic	Protein synthesis	tRNA aminoacylation	x		x		28.332	28.4982	27.7813	28.2768	28.7017	28.4998	NaN	29.2497	29.2735	4442200	14613310	4228785	8687043	8294032	5712307	5736136	20093560	15969450	12	12	12	10	8	5	2	7	7
CDIF630erm_00025	TadA	tRNA-specific adenosine deaminase	Cytoplasmic	Protein synthesis	tRNA and rRNA base modification					26.2113	25.9442	25.3901	24.6419	NaN	NaN	NaN	NaN	NaN	-3365600	-4665225	-5582911	-6393495	-6577091	-6456996	-5376761	-5848637	-5499920	4	5	2	2	0	0	1	0	1
CDIF630erm_00030	DnaX	DNA polymerase III subunit gamma/tau	Cytoplasmic	DNA metabolism	DNA replication, recombination, and repair	x	x	x		30.3734	29.8834	30.3279	28.616	28.9185	29.0863	29.995	29.9997	29.4722	-2515500	-1417115	-2589261	-4562239	-3685068	26900210	-3150143	9967256	-4253591	11	11	10	7	9	6	4	5	5
CDIF630erm_00031	YbaB	nucleoid-associated protein YbaB	Unknown	Unknown function	Unknown function		x		x	25.7374	26.5898	26.8203	24.3151	NaN	24.3065	NaN	NaN	NaN	-4405200	-3901127	-4019513	-6508869	3113034	-5605373	-5713621	-5848637	-5912021	3	3	3	2	1	2	0	0	0
CDIF630erm_00032	RecR	recombination protein RecR	Cytoplasmic	DNA metabolism	DNA replication, recombination, and repair					25.1926	25.6491	NaN	NaN	NaN	NaN	NaN	NaN	NaN	-2202000	-3234732	-5920125	-6677498	-6577091	-6456996	-5501845	-5848637	-3027928	4	3	2	0	1	0	1	0	2
CDIF630erm_00034	UgtP1	processive diacylglycerol beta-glucosyltransferase	Cytoplasmic	Cell envelope	Biosynthesis and degradation of surface polysaccharides and lipopolysaccharides	x	x	x		25.5918	25.2456	25.775	26.6874	26.8121	26.6338	NaN	26.0309	26.2761	-5823710	-5927584	-5548625	-1825859	-851558	-2684376	-5713621	-2540475	-2626665	4	5	4	6	8	5	0	4	4
CDIF630erm_00083	PycA	pyruvate carboxylase	Cytoplasmic	Energy metabolism	Glycolysis/gluconeogenesis					32.3238	32.1524	31.1934	32.1521	32.1341	31.4021	31.9158	31.307	32.0569	13479200	24148090	9973338	37273750	26815230	13457780	10248620	17731570	17070510	50	48	46	49	46	30	20	28	29
CDIF630erm_00084	FusA1	elongation factor G (EF-g)	Cytoplasmic	Unknown function	Unknown function	x	x	x		28.3583	28.2212	28.5395	27.2546	26.4906	27.5808	30.3644	29.6761	28.8721	-2557500	1019355	-2023662	-4043307	-5132074	-1778193	9591522	16083900	5612658	23	22	22	15	10	12	12	15	14
CDIF630erm_00085	CtsR	transcriptional regulator CtsR	Cytoplasmic	Regulatory functions	DNA interactions					29.7052	29.6217	29.4219	29.6169	28.9669	29.8207	28.7725	28.9912	28.8481	21563200	9774098	4971351	8364032	3995630	17090630	-176301	9789902	465905	9	10	10	12	12	9	2	2	2
CDIF630erm_00087	McsB	protein-arginine kinase	Cytoplasmic	Protein fate	Protein modification and repair	x		x		28.4108	27.674	27.9539	27.5975	27.094	27.7724	29.2425	28.5524	28.325	11144200	2330366	1185091	4155852	1695633	4405051	19864850	24376190	10095090	11	11	8	7	8	5	3	3	3
CDIF630erm_00088	ClpC	class III stress response-related ATPase, AAA+ superfamily	Cytoplasmic	Cellular processes	Adaptations to atypical conditions	x	x	x		30.4341	30.4141	30.1875	29.2368	28.7185	29.2231	30.7017	30.8444	29.9598	3496200	12327440	3812034	5091585	-341797	-59214.2	9088018	29566020	4773894	33	36	30	31	21	18	13	23	19
CDIF630erm_00089	RadA	DNA repair protein	CytoplasmicMembrane	DNA metabolism	DNA replication, recombination, and repair					29.9912	29.4922	29.1322	30.0186	29.2968	29.5349	29.3687	29.6231	30.3382	17211200	21740870	12436400	30849210	17285570	33378350	11938130	22198910	25677620	20	23	21	19	18	15	10	12	11
CDIF630erm_00090	DisA	DNA integrity scanning protein DisA	CytoplasmicMembrane	DNA metabolism	Chromosome-associated proteins		x			24.0782	23.4041	23.7375	24.1883	25.4253	24.2973	NaN	NaN	24.4679	-6257250	-6421720	-6489934	-6176692	-4298031	-4946269	-5103525	-5848637	-4964668	3	3	3	3	6	3	1	0	3
CDIF630erm_00091	CDIF630erm_00091	putative membrane protein	CytoplasmicMembrane	Hypothetical proteins	Domain					33.3648	33.2939	32.9198	33.3048	33.1346	33.5128	33.6475	33.609	33.0797	360654200	304266700	278427200	280572300	298030000	358959400	895220500	430436800	209850300	19	18	19	19	19	16	14	14	12
CDIF630erm_00092	CDIF630erm_00092	putative membrane protein	CytoplasmicMembrane	Hypothetical proteins	Domain	x	x			32.5288	32.5401	32.9587	31.9554	31.9818	31.8598	32.0221	30.7293	31.7481	27695200	54976380	133313200	43561280	25513510	29815700	26122850	29026610	26090240	25	26	26	23	19	20	11	17	14
CDIF630erm_00098	AcoA	acetoin dehydrogenase E1 component (TPP-dependent alpha subunit)	Cytoplasmic	Energy metabolism	Fermentation	x		x		25.1638	25.0557	NaN	24.7483	25.0173	24.4121	26.2466	25.9462	NaN	-5533900	-5987590	-5957459	-4977777	-3538786	-5436097	4792990	-886510	-4725782	4	2	2	5	5	4	4	2	1
CDIF630erm_00099	AcoB	acetoin dehydrogenase E1 component (TPP-dependent beta subunit)	Cytoplasmic	Energy metabolism	Fermentation	x	x	x		27.1729	26.9363	25.9704	27.6685	27.8367	28.2299	28.6947	28.5682	28.322	-2025400	-3012108	-5449766	1753964	8398997	11898900	17268800	15717750	9264591	7	5	5	8	8	9	6	8	8
CDIF630erm_00101	AcoL	acetoin dehydrogenase E3 component (dihydrolipoamide dehydrogenase)	Cytoplasmic	Energy metabolism	Fermentation	x		x		25.5579	24.9873	25.4988	25.7299	25.4578	26.157	27.5162	27.2911	26.3698	-5849790	-5044507	-5868759	-3138107	-4399245	-2941265	-3875482	33596930	-4102735	3	6	5	9	9	5	3	3	5
CDIF630erm_00102	CDIF630erm_00102	transcription antiterminator, PTS operon regulator	Cytoplasmic	Signal transduction	PTS					29.6194	28.576	27.3393	27.2059	NaN	NaN	NaN	NaN	NaN	10341200	-736051	377362	-5690065	-6244970	-5562950	-5652336	1628218	-4096164	2	2	4	2	1	1	1	1	1
CDIF630erm_00109	IspD	2-C-methyl-D-erythritol 4-phosphate cytidylyltransferase	Cytoplasmic	Biosynthesis of cofactors, prosthetic groups, and carriers	Other			x		28.0695	27.7537	26.9009	27.548	27.7125	27.5578	27.743	28.4287	28.9884	10549200	11427620	2162049	4333770	13322760	5246793	24799420	2303305	50188190	8	8	8	7	8	6	6	5	6
CDIF630erm_00110	IspF	2-C-methyl-D-erythritol 2,4-cyclodiphosphate synthase	Cytoplasmic	Biosynthesis of cofactors, prosthetic groups, and carriers	Other			x		27.2796	29.0653	28.487	29.1809	28.852	29.2088	29.527	NaN	29.7249	-3961200	11646380	9251196	12870010	2838794	8597089	3055207	9970198	636364	3	2	3	3	3	3	2	1	2
CDIF630erm_00112	ProS1	proline-tRNA ligase	Cytoplasmic	Protein synthesis	tRNA aminoacylation		x			34.2723	34.1759	34.0878	34.5746	34.6029	34.4878	34.5089	34.23	33.6954	258894200	374279300	384059300	120013500	89614780	478299500	1196815000	167283700	539155600	29	30	27	27	25	23	15	17	17
CDIF630erm_00113	ProS2	proline-tRNA ligase	Cytoplasmic	Protein synthesis	tRNA aminoacylation		x			34.3815	34.4203	34.2795	34.2026	34.1004	33.4247	33.387	33.7211	33.7717	397454200	555184100	437522100	545769500	449157800	354681700	278254800	304851000	242484000	39	37	36	34	35	30	22	27	27
CDIF630erm_00114	GltX	glutamate-tRNA ligase	Cytoplasmic	Protein synthesis	tRNA aminoacylation					26.457	26.7699	26.5424	26.4779	26.3703	26.3597	25.8703	26.834	27.363	-5057300	-1621564	-1742576	-3855590	-4282314	-2527650	-3360672	1831725	-2211720	9	10	9	7	7	8	6	8	6
CDIF630erm_00116	CysS	cysteine-tRNA ligase	Cytoplasmic	Protein synthesis	tRNA aminoacylation	x	x	x		31.1716	30.8146	30.5251	29.7175	29.4714	29.6973	30.1705	30.7954	30.8704	59666200	79386240	38876520	20534270	10975080	21431190	15026130	40764620	38745360	32	31	29	20	19	18	16	16	19
CDIF630erm_00118	ThyX	thymidylate synthase (FAD)	Cytoplasmic	Purines, pyrimidines, nucleosides, and nucleotides	2'-Deoxyribonucleotide metabolism					26.3597	26.1294	25.9893	25.7598	26.5478	NaN	NaN	NaN	NaN	152700	-4600920	-4837689	-5917125	-4793779	-5781571	-4805210	-5848637	-4119837	5	6	4	2	2	4	2	0	2
CDIF630erm_00119	CDIF630erm_00119	putative tRNA/rRNA methyltransferase, TrmH family, group3	Unknown	Protein synthesis	tRNA and rRNA base modification					24.8127	24.2876	23.6231	NaN	NaN	NaN	NaN	NaN	NaN	-4894800	-5337709	-6368490	-6677498	-6577091	-5777123	-3346075	-5848637	-2824866	5	4	2	0	0	2	2	0	3
CDIF630erm_00123	RpmG	50S ribosomal protein L33	Unknown	Protein synthesis	Ribosomal proteins: synthesis and modification		x		x	31.7832	31.1272	30.5022	27.5817	27.8995	NaN	NaN	NaN	NaN	621234200	342868100	190335700	53984210	45811730	26678640	-5713621	-5848637	-5912021	2	2	2	1	1	1	0	0	0
CDIF630erm_00124	SecE	preprotein translocase SecE subunit	CytoplasmicMembrane	Protein fate	Protein and peptide secretion and trafficking					NaN	NaN	NaN	31.4478	29.6054	NaN	NaN	NaN	NaN	360604200	528808700	732165700	778299300	538533600	712635900	62986050	224527200	62520130	1	1	1	3	2	1	1	1	1
CDIF630erm_00125	NusG	transcription antitermination protein	Cytoplasmic	Transcription	Transcription factors	x	x	x		30.6927	30.7854	30.382	28.7477	28.7764	28.6303	30.493	30.3108	31.1114	105754200	68558700	46845850	20578030	34014960	14895350	116579200	44086110	219703600	13	11	11	9	8	6	6	6	8
CDIF630erm_00126	RplK	50S ribosomal protein L11	Cytoplasmic	Protein synthesis	Ribosomal proteins: synthesis and modification	x	x	x		31.396	31.7042	32.0625	30.1713	29.5927	29.6223	32.4438	32.0198	31.6549	114904200	106265200	77005600	31256900	33447260	18919340	54756760	296629000	48270900	8	8	8	5	7	5	5	7	7
CDIF630erm_00127	RplA	50S ribosomal protein L1	Cytoplasmic	Protein synthesis	Ribosomal proteins: synthesis and modification	x	x	x		30.4841	30.9811	30.4029	29.1154	29.7513	29.8327	31.0821	31.1431	31.4654	109324200	131253800	101791800	16012590	40122910	18822820	232616100	56832660	213367700	15	16	16	12	13	11	13	7	13
CDIF630erm_00129	RplJ	50S ribosomal protein L10	Cytoplasmic	Protein synthesis	Ribosomal proteins: synthesis and modification			x		29.5718	28.9133	29.9548	29.0196	29.3883	28.6985	29.4232	29.8443	29.9335	36628200	44907490	41356110	11189780	20853650	4537115	10375650	12043350	50778930	9	9	9	8	8	5	3	4	7
CDIF630erm_00130	RplL	50S ribosomal protein L7/L12	Cytoplasmic	Protein synthesis	Ribosomal proteins: synthesis and modification		x			28.1512	28.4513	29.5924	26.671	27.6914	26.9675	28.0194	NaN	NaN	6418200	3147633	7003560	5298045	9912863	11711120	65594800	42400840	51120900	5	5	6	3	2	3	2	1	1
CDIF630erm_00131	CDIF630erm_00131	NADP-dependent 7-alpha-hydroxysteroid dehydrogenase	Cytoplasmic	Energy metabolism	Other	x		x		27.0947	26.9845	26.2709	26.2653	26.1327	26.4371	27.7866	NaN	27.7327	1674000	1625123	-3989798	-3956259	-3503755	-4020318	14811340	-5474206	21635620	11	11	8	5	3	5	6	1	7
CDIF630erm_00132	RpoB	DNA-directed RNA polymerase subunit beta	Cytoplasmic	Transcription	DNA-dependent RNA polymerase		x			32.705	32.4561	31.7409	33.7566	33.6589	33.6204	33.5519	32.1416	34.2149	10329200	18939870	11031020	134242200	103023700	98383570	32260750	52041670	70837880	56	60	50	64	61	51	32	34	42
CDIF630erm_00133	RpoC	DNA-directed RNA polymerase subunit beta'	Cytoplasmic	Transcription	DNA-dependent RNA polymerase	x	x	x		33.7555	33.378	32.6398	35.1152	34.9674	34.136	33.1445	33.1168	33.9932	38782200	57291150	29272270	266177200	216822400	148298000	47847440	213477300	71003220	68	70	66	83	79	65	28	44	41
CDIF630erm_00134	RpsL	30S ribosomal protein S12	Cytoplasmic	Protein synthesis	Ribosomal proteins: synthesis and modification	x				33.4996	33.7554	33.1174	34.2761	34.9711	33.6142	34.2917	35.3914	35.1642	638104200	469395800	234247700	1149738000	1009850000	585376400	995113000	1955610000	1077190000	15	14	13	14	13	12	9	11	13
CDIF630erm_00135	RpsG	30S ribosomal protein S7	Cytoplasmic	Protein synthesis	Ribosomal proteins: synthesis and modification	x	x	x		31.7238	31.809	31.2175	30.7541	30.3367	30.1147	32.1374	32.7522	32.8469	231104200	209323400	158649000	114262100	67837440	59350160	178928300	413796600	192075400	13	13	11	11	9	8	6	9	8
CDIF630erm_00136	FusA2	elongation factor G (EF-g)	Cytoplasmic	Protein synthesis	Translation factors			x		35.6844	35.5385	34.9058	35.7324	35.6322	35.3646	35.7974	36.3217	35.8702	484564200	636374200	302129100	960831400	803098000	648512500	1095167000	2087194000	838638200	49	47	45	46	42	41	32	44	37
CDIF630erm_00137	Tuf2	elongation factor EFTu/EF1A	Cytoplasmic	Protein synthesis	Translation factors					39.1005	38.8291	37.9103	38.1916	38.594	38.181	37.4692	38.6178	38.4353	11157250000	9749148000	5396570000	10244760000	11087180000	12845300000	12665510000	19150060000	16507300000	42	43	37	35	36	33	32	32	36
CDIF630erm_00138	RpsJ	30S ribosomal protein S10	Cytoplasmic	Protein synthesis	Ribosomal proteins: synthesis and modification					34.0278	34.1263	33.9044	34.2234	33.9237	33.5629	34.3465	34.1904	34.2523	742834200	568664800	347402700	696095600	640763900	641843500	487994300	1095079000	484230100	12	14	11	11	10	9	8	9	9
CDIF630erm_00139	RplC	50S ribosomal protein L3	Cytoplasmic	Protein synthesis	Ribosomal proteins: synthesis and modification	x	x	x		31.6528	32.1062	31.2192	30.0439	30.3129	30.5712	31.6663	32.2497	32.3303	192324200	182774600	110078200	68793240	100724800	46889660	340650100	93575030	423833000	18	18	17	15	12	9	15	11	20
CDIF630erm_00140	RplD	50S ribosomal protein L4	Unknown	Protein synthesis	Ribosomal proteins: synthesis and modification	x	x	x		32.5676	32.8181	32.5277	31.6471	31.8957	31.5438	32.1538	32.8452	33.009	510364200	422473200	239159300	188568900	302516900	183630500	598465000	337755400	1042542000	13	13	10	12	12	8	10	10	13
CDIF630erm_00141	RplW	50S ribosomal protein L23	Cytoplasmic	Protein synthesis	Ribosomal proteins: synthesis and modification	x	x	x		29.5477	29.7046	29.2786	27.1255	26.5033	27.0736	29.3113	28.7416	28.6611	36317200	31685100	17437410	409115	-2995698	-789522	3943153	10349750	763005	7	8	7	8	7	4	3	3	3
CDIF630erm_00142	RplB	50S ribosomal protein L2	Unknown	Protein synthesis	Ribosomal proteins: synthesis and modification	x	x	x		31.714	31.916	31.5536	30.9856	30.6728	29.9396	32.4451	31.512	31.7518	146574200	140673000	109441200	76847100	78682130	40712060	589722900	277046600	302354900	13	15	13	10	10	8	10	9	11
CDIF630erm_00143	RpsS	30S ribosomal protein S19	Cytoplasmic	Protein synthesis	Ribosomal proteins: synthesis and modification				x	25.2072	27.4549	26.3154	NaN	NaN	NaN	NaN	NaN	NaN	-5770420	-1464722	-2873267	-6677498	-6577091	-6456996	-5713621	-5848637	-5912021	3	4	4	0	0	0	1	0	1
CDIF630erm_00144	RplV	50S ribosomal protein L22	Cytoplasmic	Protein synthesis	Ribosomal proteins: synthesis and modification					32.5432	32.5541	31.8338	32.3419	31.6943	32.1307	32.2595	32.7368	32.3817	335284200	175361400	93797230	276528700	211470600	333862900	142158600	298770400	111002400	8	8	7	8	8	7	6	6	5
CDIF630erm_00145	RpsC	30S ribosomal protein S3	Cytoplasmic	Protein synthesis	Ribosomal proteins: synthesis and modification	x		x		32.982	33.1254	32.6766	32.5358	32.8102	32.8272	33.5253	32.9908	33.3097	354464200	316996300	217431800	294924600	401664700	363763800	1333200000	666864300	1073883000	18	18	17	17	16	14	16	13	17
CDIF630erm_00146	RplP	50S ribosomal protein L16	Cytoplasmic	Protein synthesis	Ribosomal proteins: synthesis and modification					30.691	31.2651	29.1943	30.503	29.7294	29.2904	29.6612	30.8087	30.7527	123294200	107635600	58837780	194477300	135511200	106015600	30728300	150547100	57912940	7	7	4	6	5	3	2	2	2
CDIF630erm_00147	RpmC	50S ribosomal protein L29	Cytoplasmic	Protein synthesis	Ribosomal proteins: synthesis and modification		x			28.2005	28.7618	28.11	27.3106	26.5796	27.1822	NaN	NaN	NaN	13805200	12902000	8093338	15314240	11957470	10367880	-5713621	-5848637	-828180	5	5	4	4	3	3	1	0	1
CDIF630erm_00148	RpsQ	30S ribosomal protein S17	Cytoplasmic	Protein synthesis	Ribosomal proteins: synthesis and modification					32.1624	32.0194	30.0602	31.9463	32.8087	31.7089	32.0637	31.6558	31.6593	354544200	207953000	51266230	264174400	359590000	331603400	281130300	576863600	171241600	6	6	6	4	4	4	3	4	4
CDIF630erm_00149	RplN	50S ribosomal protein L14	Cytoplasmic	Protein synthesis	Ribosomal proteins: synthesis and modification	x	x			33.7089	33.8701	33.5275	34.9316	35.2173	34.3729	35.3937	35.2104	34.8051	647124200	454792400	229243800	1039943000	984347800	1097003000	932163500	2804127000	728794600	12	11	11	10	12	9	7	8	8
CDIF630erm_00150	RplX	50S ribosomal protein L24	Cytoplasmic	Protein synthesis	Ribosomal proteins: synthesis and modification		x			28.0143	28.6656	29.3643	25.7453	25.6761	25.2304	NaN	NaN	NaN	16576200	19530120	29756620	217878	-1285385	-2790726	-5713621	2388794	-3195706	4	4	4	3	2	2	0	1	1
CDIF630erm_00151	RplE	50S ribosomal protein L5	Cytoplasmic	Protein synthesis	Ribosomal proteins: synthesis and modification	x	x	x		35.4404	35.0127	34.7581	34.0913	34.4317	33.5959	34.5776	35.1423	35.2634	965884200	606985600	334934200	536064900	755272100	1029545000	591224200	749394800	1534678000	21	25	20	19	24	14	17	14	22
CDIF630erm_00152	RpsZ	30S ribosomal protein S14 type Z	Cytoplasmic	Protein synthesis	Ribosomal proteins: synthesis and modification					31.1821	31.7345	NaN	NaN	NaN	NaN	NaN	NaN	NaN	804624200	312018400	147970000	115874800	152800900	193761300	85528250	91448430	36767950	2	2	1	1	1	1	1	1	1
CDIF630erm_00153	RpsH	30S ribosomal protein S8	Cytoplasmic	Protein synthesis	Ribosomal proteins: synthesis and modification	x	x	x		32.3152	32.6486	32.156	31.8189	31.7044	30.9511	32.9139	32.531	32.1507	260504200	227839900	125294300	145169400	145305500	121885200	163984800	408157300	133865500	12	15	10	11	11	10	7	8	7
CDIF630erm_00154	RplF	50S ribosomal protein L6	Cytoplasmic	Protein synthesis	Ribosomal proteins: synthesis and modification	x	x	x		29.2574	29.6647	29.5702	27.9112	28.4013	28.1679	29.8436	29.9007	30.0718	76447200	71650280	42460960	14369470	17448930	15026530	79131670	61715190	213217400	7	8	8	4	4	3	3	3	6
CDIF630erm_00155	RplR	50S ribosomal protein L18	Cytoplasmic	Protein synthesis	Ribosomal proteins: synthesis and modification					32.513	32.5648	32.6596	32.9005	32.4996	32.2072	32.1298	32.5819	31.9632	167934200	150562800	81951180	202883200	252954100	151237600	128912800	221208900	79210500	10	10	9	11	10	9	6	4	3
CDIF630erm_00156	RpsE	30S ribosomal protein S5	Cytoplasmic	Protein synthesis	Ribosomal proteins: synthesis and modification		x			32.8501	32.6236	31.9218	33.8025	33.9441	33.2111	33.2305	34.8034	35.2209	321214200	234584400	125124100	610324100	555801100	386578800	457818700	1432393000	817669100	14	15	13	17	18	17	12	13	12
CDIF630erm_00157	RpmD	50S ribosomal protein L30	Cytoplasmic	Protein synthesis	Ribosomal proteins: synthesis and modification	x	x			31.0758	31.5187	31.5128	28.6109	27.9756	27.8515	27.0257	30.1973	NaN	108264200	109435200	101976600	17288460	17689170	3769960	-616866	21626810	-4756116	7	6	7	5	4	3	2	2	2
CDIF630erm_00158	RplO	50S ribosomal protein L15	Unknown	Protein synthesis	Ribosomal proteins: synthesis and modification	x	x	x		31.3011	31.8339	31.3737	30.5233	30.2961	30.4421	32.7218	32.0591	32.3228	118744200	107602600	68466340	81561450	80981020	51557960	116059500	201790000	85711670	9	10	8	9	7	7	3	4	3
CDIF630erm_00159	SecY	preprotein translocase SecY subunit	CytoplasmicMembrane	Protein fate	Protein and peptide secretion and trafficking	x	x	x		33.2172	33.127	32.8156	33.9361	33.7628	33.6269	32.6677	31.9794	32.3559	169444200	273392200	324187200	412816500	307994300	280532900	129005100	109695400	62509610	12	13	11	13	12	10	6	8	6
CDIF630erm_00160	Adk	adenylate kinase	Cytoplasmic	Purines, pyrimidines, nucleosides, and nucleotides	Nucleotide and nucleoside interconversions	x	x			29.4222	29.6914	29.4178	26.9043	27.0841	26.5809	26.8464	26.9832	28.466	21271200	17865870	13516940	-2444256	-2223103	-3887484	2345682	-3160216	15125420	16	16	16	9	7	7	3	3	7
CDIF630erm_00161	Map1	methionine aminopeptidase	Cytoplasmic	Protein fate	Protein modification and repair	x	x			31.0277	30.6203	30.0932	28.4587	28.8035	28.294	29.3958	28.2815	29.2014	133814200	83844060	54855060	6686659	11834760	558090	49844130	4387247	34366650	20	20	18	14	14	8	9	6	10
CDIF630erm_00163	InfA	translation initiation factor IF-1	Cytoplasmic	Protein synthesis	Translation factors				x	27.3259	26.9809	26.8623	NaN	NaN	NaN	NaN	NaN	NaN	11767200	-132670	2234506	-3241691	-5940183	-6456996	-5713621	-5848637	-5912021	2	3	2	1	1	0	0	0	0
CDIF630erm_00165	RpsM	30S ribosomal protein S13	Cytoplasmic	Protein synthesis	Ribosomal proteins: synthesis and modification	x	x	x		31.2006	31.6332	31.2399	30.3028	30.565	30.1901	32.0467	31.6087	31.3831	122224200	107957600	50269340	67613460	78911280	47574110	63043790	125503500	39732940	15	14	13	11	12	8	5	5	4
CDIF630erm_00166	RpsK	30S ribosomal protein S11	Cytoplasmic	Protein synthesis	Ribosomal proteins: synthesis and modification					32.2086	32.7779	31.7851	32.4665	32.5113	31.8057	32.6789	32.2748	32.5992	389354200	317673200	154102100	375044700	305118900	324868500	226368500	403776600	190978100	6	6	6	6	6	6	5	6	6
CDIF630erm_00167	RpsD	30S ribosomal protein S4	Cytoplasmic	Protein synthesis	Ribosomal proteins: synthesis and modification	x		x		31.3621	31.6298	31.361	31.3225	31.4953	31.3446	31.6785	31.891	32.0798	113114200	96623140	57646370	87959820	148742800	140786600	178304700	125912200	283437600	15	17	15	12	13	10	10	8	14
CDIF630erm_00168	RpoA	DNA-directed RNA polymerase subunit alpha	Cytoplasmic	Transcription	DNA-dependent RNA polymerase	x	x	x		28.8962	28.5801	29.1749	30.6316	30.4477	30.5043	29.4136	29.3632	29.0893	6539200	3977283	6266343	41340160	54244440	55715120	4918635	9315053	1573961	18	17	16	18	16	17	8	7	8
CDIF630erm_00169	RplQ	50S ribosomal protein L17	Cytoplasmic	Protein synthesis	Ribosomal proteins: synthesis and modification	x		x		31.3976	31.1215	30.6058	30.1052	30.2431	30.6175	32.5602	31.9706	31.6318	258924200	141589300	100532400	113705600	118886800	128275600	175498400	250141200	78924900	6	6	5	3	3	3	2	4	3
CDIF630erm_00170	EcfA1	energy-coupling factor transporter ATP-binding protein EcfA1	CytoplasmicMembrane	Transport and binding proteins	Cations and iron carrying compounds					30.5488	31.3245	31.1705	31.1422	31.6973	31.3319	31.1929	31.0999	30.598	141164200	149960100	175557300	94857700	207604700	216409500	357972400	176159600	68830410	15	15	15	10	12	8	11	6	9
CDIF630erm_00171	EcfA2	energy-coupling factor transporter ATP-binding protein EcfA2	CytoplasmicMembrane	Transport and binding proteins	Cations and iron carrying compounds	x		x		31.087	31.0618	32.3084	32.0792	31.9936	32.5724	31.3284	30.5062	30.002	239094200	196139800	232351200	94786340	174023100	165929200	185603200	63988910	45891400	26	25	23	21	22	14	15	8	8
CDIF630erm_00172	EcfT	energy-coupling factor transporter transmembrane protein EcfT	CytoplasmicMembrane	Transport and binding proteins	Cations and iron carrying compounds					29.5463	29.671	29.8378	29.6356	29.7525	30.2729	30.3658	29.7078	29.2684	38519200	48994650	45498820	36408900	28001640	39779720	5032616	977486	33480540	10	10	10	8	8	7	3	3	6
CDIF630erm_00173	TruA1	transfer RNA pseudouridine synthase A	Unknown	Protein synthesis	tRNA and rRNA base modification	x		x		25.7913	25.8402	25.5566	25.2874	25.4469	NaN	27.2562	26.56	26.8764	-2627100	-3184543	-3990433	-5472888	-3427631	-5864560	9765900	-3934031	6010996	7	6	6	4	5	2	4	3	6
CDIF630erm_00174	RplM	50S ribosomal protein L13	Unknown	Protein synthesis	Ribosomal proteins: synthesis and modification					32.2021	32.0435	31.0241	31.4904	29.7372	28.2092	30.6675	31.9436	31.3004	215094200	163168500	118967600	169492700	104561300	74225980	97510730	207429300	75392460	9	9	7	8	6	3	3	4	4
CDIF630erm_00175	RpsI	30S ribosomal protein S9	Cytoplasmic	Protein synthesis	Ribosomal proteins: synthesis and modification	x	x	x		31.881	32.0529	31.7485	31.7248	30.9974	31.7395	33.0866	32.8661	32.3685	331224200	244003600	160137000	175011000	137950600	195799200	290623000	521450900	162553300	11	13	11	11	11	8	5	7	5
CDIF630erm_00203	AspC	aspartate aminotransferase	CytoplasmicMembrane	Amino acid biosynthesis	Aspartate family					30.6782	29.5462	30.3334	30.5926	30.9043	30.3005	30.3785	30.9261	30.7584	31770200	19697700	11162320	56895590	80788830	46957670	26277600	49743430	54705940	17	17	15	17	19	14	9	8	10
CDIF630erm_00204	NrdD	anaerobic ribonucleoside triphosphate reductase	Cytoplasmic	Purines, pyrimidines, nucleosides, and nucleotides	2'-Deoxyribonucleotide metabolism					35.3731	35.2461	34.6949	35.757	35.3663	35.4772	34.9345	35.9158	35.3581	242364200	348093700	170611700	931051600	622624100	639759500	532639900	1003721000	506040900	52	52	45	50	45	45	38	44	40
CDIF630erm_00205	NrdG	anaerobic ribonucleoside-triphosphate reductase-activating protein	Cytoplasmic	Protein fate	Protein modification and repair	x	x	x		23.7353	22.9094	23.6173	25.1077	25.5619	NaN	25.0207	NaN	24.8583	-4969200	-6344396	-6425539	-4871533	-4370746	-6417084	-4207950	-5412744	702127	2	2	2	2	2	1	2	1	2
CDIF630erm_00225	YbbP	putative diadenylate cyclase-like protein YbbP	CytoplasmicMembrane	Unknown function	Unknown function	x	x			30.4564	31.3202	30.5092	30.0127	29.4923	29.6924	30.0847	29.8442	30.3347	50032200	70767790	64366910	25982160	46308470	54765230	117156600	23992060	88372260	7	7	7	5	5	5	5	3	8
CDIF630erm_00226	CDIF630erm_00226	putative exported protein	Unknown	Unknown function	Unknown function	x	x	x		30.5628	30.5352	31.1003	31.6821	31.611	31.994	29.0933	30.4075	29.8693	26218200	49409890	67965460	80419730	71090620	153609000	10284420	32572040	23945230	28	31	33	31	31	27	9	10	10
CDIF630erm_00227	Ptb1	phosphate butyryltransferase	Cytoplasmic	Unknown function	Unknown function					31.0009	30.7251	30.554	29.9185	30.6432	29.6506	30.798	31.0295	30.5143	32859200	15141640	16671510	81932500	129634700	-3122737	22248410	12605490	2640154	13	12	13	10	9	8	7	5	5
CDIF630erm_00228	Buk	butyrate kinase	Cytoplasmic	Energy metabolism	Fermentation	x	x	x		31.1037	30.7976	30.7777	29.7168	30.1576	30.2733	31.9237	31.953	31.8072	69882200	49349620	32559600	21684550	24734410	28152840	165844100	212333100	169219900	27	27	24	23	21	17	20	19	21
CDIF630erm_00229	CDIF630erm_00229	putative ATP/GTP-binding protein	Cytoplasmic	Energy metabolism	Fermentation					29.5685	28.9932	28.7578	29.4152	29.5997	29.5443	30.2602	29.1898	29.9666	56769200	25388850	10802950	26655770	68145690	39358520	300173400	51126300	147476600	11	11	8	8	8	7	10	6	9
CDIF630erm_00230	VorC1	3-methyl-2-oxobutanoate dehydrogenase (ferredoxin), gamma subunit (ferredoxin)	Unknown	Unknown function	Unknown function		x			28.5232	28.9707	28.1799	26.1612	25.9201	26.6902	NaN	NaN	NaN	12127200	10334630	3708454	-3324178	-3300475	-1064088	-4576006	-5218364	-5912021	4	4	4	3	2	3	1	1	0
CDIF630erm_00231	VorB1	3-methyl-2-oxobutanoate dehydrogenase (ferredoxin), beta subunit	Cytoplasmic	Energy metabolism	Electron transport		x			32.9764	32.1643	32.2696	32.0032	31.9824	31.5226	32.3043	31.9766	32.3374	303954200	216621000	171900400	125655500	124105500	97580660	235838100	280773500	203507000	22	23	20	18	19	14	14	16	18
CDIF630erm_00232	VorA1	3-methyl-2-oxobutanoate dehydrogenase (ferredoxin), alpha subunit	Unknown	Energy metabolism	Fermentation	x	x			33.7386	33.4983	32.4338	31.1706	32.1729	31.5109	32.8024	32.1531	33.0753	685294200	442459100	219654100	89805600	207264600	135927400	851891500	249667200	674199700	8	9	8	8	9	8	8	6	9
CDIF630erm_00233	VorA'1	3-methyl-2-oxobutanoate dehydrogenase (ferredoxin), alpha subunit N-terminal region	Cytoplasmic	Energy metabolism	Electron transport		x			30.8682	31.1605	30.8046	30.7756	30.6619	29.9666	30.5169	30.8149	30.8048	142424200	115032300	43405830	101760300	142703600	190005600	71633380	54501730	343165800	9	9	8	8	8	7	5	4	9
CDIF630erm_00234	GlmM	phosphoglucosamine mutase	Cytoplasmic	Energy metabolism	Electron transport					29.7025	29.3906	28.6213	29.6248	29.8242	29.2571	28.9231	29.9454	30.1062	10143200	17023830	7918273	27374100	24897770	22341590	7686059	22457180	24497640	15	14	14	14	13	10	8	9	10
CDIF630erm_00236	GlmS	glucosamine-fructose-6-phosphate aminotransferase [isomerizing]	Cytoplasmic	Central intermediary metabolism	Amino sugars					31.7355	31.6778	31.685	31.8218	32.0862	31.4438	32.0859	31.8539	31.7462	40863200	75270190	55239230	92165140	80781440	62511360	47242310	79103980	64490780	31	28	29	32	27	22	17	20	20
CDIF630erm_00239	MurA	UDP-N-acetylglucosamine 1-carboxyvinyltransferase	Cytoplasmic	Cell envelope	Biosynthesis and degradation of murein sacculus and peptidoglycan		x			30.2126	29.6043	29.2667	30.9486	31.1527	30.5466	29.0761	30.7882	30.6669	19389200	41446900	16131240	90457330	63323200	60405360	8092558	52912910	44265730	14	15	13	17	15	14	4	9	11
CDIF630erm_00243	MreB1	rod shape-determining protein MreB	Cytoplasmic	Cell envelope	Biosynthesis and degradation of murein sacculus and peptidoglycan					33.6923	32.613	32.1944	34.1772	33.9933	33.6421	33.3078	33.7573	33.5302	420494200	193655000	117499000	784388400	666635600	927579600	537674900	832285000	384209700	20	22	18	22	22	19	14	13	16
CDIF630erm_00244	FabZ	(3R)-hydroxymyristoyl-[acyl-carrier-protein] dehydratase	Cytoplasmic	Fatty acid and phospholipid metabolism	Biosynthesis		x		x	24.4167	24.1396	24.2001	25.1642	NaN	24.7242	NaN	NaN	NaN	-5166600	-6413610	-6354248	-5586861	-6577091	-4167735	-5713621	-5848637	-5912021	3	2	2	3	0	3	0	0	0
CDIF630erm_00247	MetK	S-adenosylmethionine synthetase	Cytoplasmic	Central intermediary metabolism	Other	x	x			30.9701	30.3017	29.973	31.3724	31.6398	31.0691	31.1339	31.1933	31.7269	29486200	31651260	21883570	84035170	100917000	91668500	56714190	89282590	78962470	17	19	21	21	20	13	7	9	10
CDIF630erm_00249	YrrC	ATP-dependent RecD-like DNA helicase	Cytoplasmic	Unknown function	Enzymes of unknown specificity					24.3495	NaN	NaN	26.5068	25.2877	NaN	NaN	NaN	25.6001	-6454190	-6533198	-6679891	-5914274	-6071789	-6303849	-5533180	13288750	-4935325	4	1	1	3	2	2	1	2	3
CDIF630erm_00251	CDIF630erm_00251	transcription antiterminator, PTS operon regulator	Cytoplasmic	Signal transduction	PTS					27.2272	27.0466	NaN	27.4417	26.7322	26.803	NaN	NaN	NaN	-5235600	-5675289	-6480181	-2832932	-4844718	-3830568	-5640449	-4738740	-3949898	3	4	4	8	6	4	1	4	2
CDIF630erm_00252	CDIF630erm_00252	PTS system, lactose/cellobiose-family IIA component	Cytoplasmic	Signal transduction	PTS				x	25.0367	25.1486	24.8218	NaN	NaN	NaN	NaN	NaN	NaN	-5194100	-5698262	-6086097	-5896155	-5995259	-5775179	-5713621	-5848637	-5912021	2	2	2	1	1	1	0	0	0
CDIF630erm_00259	CDIF630erm_00259	putative RNA-binding protein	Cytoplasmic	Protein synthesis	Translation factors		x	x		28.1397	28.3732	28.8138	27.0934	27.7575	27.9143	29.0582	27.9909	29.1046	22269200	12769920	8791651	2513682	7218508	2801858	8541785	9102556	82434780	8	8	7	6	5	3	5	4	7
CDIF630erm_00260	SecA1	protein translocase subunit SecA1	Cytoplasmic	Protein fate	Protein and peptide secretion and trafficking		x			32.6509	32.8632	33.0805	32.1787	31.8907	32.1679	31.994	33.0293	33.009	24807200	58927340	41477680	59659500	44213600	38090530	33316260	118499300	54415080	55	57	58	51	47	41	30	38	34
CDIF630erm_00263	CDIF630erm_00263	putative S1 RNA-binding domain-containing protein	Cytoplasmic	Transcription	Other	x		x		27.4732	27.7767	27.4168	27.595	26.7375	27.7289	27.948	28.8448	28.3919	-5121400	-3133430	-4221867	-633982	-4723337	-4565354	-2730342	6139367	-2174096	19	21	19	19	11	8	5	12	11
CDIF630erm_00264	CDIF630erm_00264	putative metal-dependent hydrolase	Cytoplasmic	Amino acid biosynthesis	Histidine family		x			26.5408	26.4001	26.0639	27.6023	26.6803	26.9589	24.9831	27.5538	27.9304	-2345600	-2347928	-2256746	8343101	2047267	3817784	-4598556	4006550	5257912	4	3	3	5	5	5	2	2	3
CDIF630erm_00266	RibU	riboflavin transporter	CytoplasmicMembrane	Transport and binding proteins	Other					NaN	NaN	NaN	25.724	26.0918	NaN	NaN	NaN	NaN	-6745800	-6758146	-6722046	3726756	-641746	-6317890	-1774967	-5848637	-5912021	0	0	0	4	3	1	1	0	0
CDIF630erm_00268	TsaE	tRNA threonylcarbamoyladenosine biosynthesis protein TsaE	Cytoplasmic	Unknown function	Enzymes of unknown specificity	x		x		28.8911	27.6264	27.8936	29.0895	27.7778	28.2311	30.0539	29.957	30.2248	24729200	5470652	5057911	48922600	15515200	22479800	16527410	55557680	16063390	7	8	6	5	4	4	3	4	4
CDIF630erm_00270	RimI	putative alanine acetyltransferase, ribosomal family	Cytoplasmic	Protein synthesis	Ribosomal proteins: synthesis and modification					26.8437	25.6929	26.0858	28.7214	27.008	NaN	26.5806	26.9272	27.956	-2307300	-4655815	-5608055	10820150	1730449	1812257	-1038051	2122192	4668672	3	3	2	4	4	2	2	2	2
CDIF630erm_00271	TsaD	tRNA N6-adenosine threonylcarbamoyltransferase	Cytoplasmic	Unknown function	Unknown function					25.5991	25.5663	25.2668	24.7795	25.4145	NaN	NaN	25.795	NaN	-4705900	-5108166	-5538720	-4670131	-4762630	-5192700	-3766127	1723515	-4019206	5	4	3	3	2	1	1	3	1
CDIF630erm_00272	HpdB	4-hydroxyphenylacetate decarboxylase large subunit	Cytoplasmic	Energy metabolism	Anaerobic					25.7241	24.9095	25.5557	25.9591	24.7272	26.2791	NaN	NaN	NaN	-6551180	-6675230	-6662006	-5612076	-6060001	-4661687	-5365448	-5195019	-5802434	3	3	2	6	6	4	1	1	1
CDIF630erm_00275	CDIF630erm_00275	putative membrane-membrane-associated CAAX amino terminal protease	CytoplasmicMembrane	Hypothetical proteins	Domain					25.8943	26.5699	26.8184	27.2493	25.5272	26.023	NaN	NaN	NaN	-5998810	-2679234	2525308	2263455	-2279912	-4629311	-5713621	-5753651	-5356103	2	3	3	3	3	3	0	1	1
CDIF630erm_00282	CDIF630erm_00282	peptide maturation system protein	Cytoplasmic	Unknown function	Unknown function				x	NaN	NaN	NaN	27.479	28.5321	29.334	NaN	NaN	NaN	-6267740	-6189224	5448402	-1903214	3636382	4551594	-5713621	-5848637	-5912021	2	1	3	3	2	2	0	0	0
CDIF630erm_00288	CDIF630erm_00288	transcriptional regulator, sigma-54-dependent	Cytoplasmic	Transcription	Transcription factors	x	x	x		26.5042	25.6096	25.6128	27.6135	27.6396	27.7985	25.8857	27.2536	26.4359	-6102050	-6219993	-6248729	-1494391	-1858488	574543	-5395838	5793814	-5082230	7	7	6	16	12	14	2	4	2
CDIF630erm_00289	CDIF630erm_00289	putative cyclic nucleotide-binding protein	Cytoplasmic	Transport and binding proteins	Nucleosides, purines and pyrimidines		x			24.4831	24.6766	22.9975	24.9147	25.1497	NaN	NaN	NaN	24.8726	-5236900	-5477207	-6549662	-5131600	-5083218	-6456996	-3683954	-5368989	-2366807	2	2	2	2	3	0	1	1	2
CDIF630erm_00290	CDIF630erm_00290	putative drug/sodium antiporter, MatE family	CytoplasmicMembrane	Transport and binding proteins	Other					25.1855	NaN	25.4876	NaN	NaN	NaN	NaN	NaN	NaN	-6529190	-6758146	-4168532	-6605034	-6577091	-6263890	-5713621	-5848637	-5912021	2	0	3	2	0	1	0	0	0
CDIF630erm_00291	CDIF630erm_00291	ABC-type transport system, ATP-binding protein	Cytoplasmic	Transport and binding proteins	Amino acids, peptides and amines	x	x	x		28.5591	28.2921	28.3105	28.9604	29.112	29.0421	29.3877	29.91	30.107	529300	1196512	263083	9376355	12485250	8141008	2507704	11347180	5558544	15	13	13	17	16	7	5	6	6
CDIF630erm_00292	Rex	transcriptional regulator, redox-sensing repressor Rex	Cytoplasmic	Regulatory functions	DNA interactions	x	x			28.0324	28.2971	28.2876	29.5651	30.1308	29.4861	29.5495	29.4772	29.7107	12834200	7194342	39875.8	26027350	36687880	40196530	13690000	10217190	87267440	8	8	6	10	10	8	4	5	7
CDIF630erm_00296	CDIF630erm_00296	putative CO dehydrogenase (NAD), catalytic subunit	Cytoplasmic	Energy metabolism	Anaerobic	x	x			29.8684	28.7792	29.1934	27.4783	28.7323	26.0992	25.6671	26.1069	NaN	6050200	14150190	15402770	-1021074	493559	-4946593	-5235405	-4544616	-5793001	18	17	19	13	13	4	2	2	1
CDIF630erm_00298	CDIF630erm_00298	putative CO dehydrogenase (NAD), NADH dehydrogenase subunit	Cytoplasmic	Energy metabolism	Electron transport	x	x	x		27.1332	26.7899	26.5432	25.3807	25.5155	NaN	NaN	25.3575	24.7463	-3375100	-2857296	-2518974	-5412131	-5597903	-5487887	-5626674	-3700859	-5453547	9	6	8	5	6	2	1	3	2
CDIF630erm_00299	Cfa	cyclopropane-fatty-acyl-phospholipid synthase	Cytoplasmic	Fatty acid and phospholipid metabolis	Biosynthesis		x			27.0759	26.4636	26.9997	26.1401	26.0322	25.3534	NaN	NaN	26.939	-1594100	-2406974	-2048424	-5252416	-4967235	-5631268	-4816297	-3477077	-3858808	9	8	8	6	7	4	2	2	3
CDIF630erm_00301	GluD	glutamate dehydrogenase	Cytoplasmic	Central intermediary metabolism	Nitrogen metabolism	x	x	x		29.0872	28.4469	28.4471	29.1578	29.5673	29.4443	29.6811	29.8183	30.0603	10095200	7394119	6362629	16260910	16600340	19173820	22404310	143121200	18451920	14	8	13	16	14	11	7	7	7
CDIF630erm_00306	PyrK	dihydroorotate dehydrogenase (NAD+), electron transfer subunit	Cytoplasmic	Energy metabolism	Electron transport	x	x	x		27.2535	27.8007	27.2686	24.1026	25.602	26.3461	27.5754	27.2963	27.7232	8552200	7602976	659410	-6030402	-3750398	-3312458	20732130	-55683.6	25274770	7	7	6	4	3	3	4	3	4
CDIF630erm_00307	PyrD	dihydroorotate dehydrogenase (NAD+), catalytic subunit	Cytoplasmic	Purines, pyrimidines, nucleosides, and nucleotides	Pyrimidine ribonucleotide biosynthesis	x				26.2375	25.4808	25.4528	27.0847	NaN	26.4108	27.1283	27.4924	27.0763	-2256700	-2476631	-4319520	-5930556	-5507293	-321996	16070100	5211082	2484126	8	8	5	2	1	3	8	4	6
CDIF630erm_00308	PyrE	orotate phosphoribosyltransferase	Cytoplasmic	Purines, pyrimidines, nucleosides, and nucleotides	Pyrimidine ribonucleotide biosynthesis		x			27.8034	28.0287	28.6225	26.5761	27.2562	NaN	NaN	NaN	27.3036	7747200	9520663	4437404	-169788	2978501	-5763572	-5713621	-4530707	-1203610	8	8	7	3	4	1	0	1	2
CDIF630erm_00309	CDIF630erm_00309	putative 2-dehydropantoate 2-reductase	Cytoplasmic	Biosynthesis of cofactors, prosthetic groups, and carriers	Pantothenate and coenzyme A					23.3434	23.0398	NaN	23.3958	24.5659	25.1721	26.5014	26.2946	24.2961	-5950230	-6423998	-6722046	-6308797	-5171461	-4727353	9318983	-1270703	-2679770	3	2	0	3	3	3	4	2	4
CDIF630erm_00310	CDIF630erm_00310	transcriptional regulator, LysR family	Cytoplasmic	Regulatory functions	DNA interactions	x	x	x		24.5086	23.9479	24.5506	26.2586	25.9919	26.2769	25.6037	NaN	24.9561	-5612700	-6019576	-5952506	-4141506	-1011569	-3036420	-2066915	-5610153	-3456825	4	4	3	4	5	5	2	1	2
CDIF630erm_00312	CDIF630erm_00312	putative 8-oxoguanine-DNA-glycosylase	Cytoplasmic	DNA metabolism	Restriction/modification					26.6429	26.0501	26.1611	26.1454	26.4898	26.6751	28.248	27.0319	26.433	-551600	-2918188	-2465766	-3051566	2682085	-3326599	21799190	249766	-925660	8	7	9	8	7	5	5	4	3
CDIF630erm_00313	Cls1	cardiolipin synthase	CytoplasmicMembrane	Fatty acid and phospholipid metabolis	Biosynthesis	x		x		29.8475	30.0724	30.0201	29.7851	29.7141	29.9779	28.592	27.8763	28.6919	15737200	28250110	29774130	17179040	11128830	24337910	1740900	5388925	3573618	19	18	21	17	14	12	4	3	4
CDIF630erm_00314	GroS	10 kDa chaperonin	Cytoplasmic	Protein fate	Protein folding and stabilization		x	x		26.7881	26.8005	27.9644	26.0943	NaN	25.7515	27.1596	27.2987	NaN	-3067700	-1232687	1007108	-5691268	-6412271	-5839784	5930262	-4238753	-5716583	3	4	4	3	1	2	3	1	1
CDIF630erm_00315	GroL	60 kDa chaperonin	Cytoplasmic	Protein fate	Protein folding and stabilization					29.0602	29.1306	29.6089	29.1069	29.4475	29.7471	29.2487	29.498	29.5237	1991600	12107850	20471870	15412240	15014030	17359590	2950927	211319600	14087490	16	13	19	23	19	16	11	16	12
CDIF630erm_00316	LarB	Ni2+ loading protein for larE	Cytoplasmic	Purines, pyrimidines, nucleosides, and nucleotides	Purine ribonucleotide biosynthesis					25.2665	24.701	25.1323	25.2322	25.681	NaN	NaN	NaN	26.1512	-3182400	-4486702	-4842959	-2417584	-1981478	-5631680	-3907194	-5848637	2118106	4	4	2	3	3	1	1	0	2
CDIF630erm_00317	LarC	Ni2+ carrier LarC	Cytoplasmic	Purines, pyrimidines, nucleosides, and nucleotides	Purine ribonucleotide biosynthesis					26.7823	NaN	28.4116	26.4603	26.8313	26.2679	26.7439	NaN	NaN	-1478300	-3589841	-4177802	-160919	-1461302	21718.1	-2632816	-5472808	-5636708	6	4	5	4	3	3	3	1	1
CDIF630erm_00320	GuaA	GMP synthase (glutamine-hydrolysing)	Cytoplasmic	Purines, pyrimidines, nucleosides, and nucleotides	Purine ribonucleotide biosynthesis	x	x			30.5281	30.22	30.3164	30.6092	30.6586	30.9234	30.7308	31.0592	31.1562	15271200	27775430	24694330	50834970	44821220	58694230	24843310	24335330	31296440	22	23	24	25	23	21	10	10	14
CDIF630erm_00324	CDIF630erm_00324	alpha/beta hydrolase	Unknown	Unknown function	Unknown function		x			24.9135	24.3194	24.9177	25.31	NaN	25.7018	25.0833	NaN	NaN	-5715400	-5430523	-4394442	-3178971	-6407252	-4907559	-3848804	-4459274	-5912021	4	4	5	2	1	2	2	1	0
CDIF630erm_00325	CDIF630erm_00325	putative UvrABC system protein A 1	Cytoplasmic	DNA metabolism	DNA replication, recombination, and repair					25.7363	26.0421	25.0567	25.8118	25.3859	24.8926	NaN	25.5798	25.2687	-6555880	-6337255	-6644394	-5775212	-6186684	-6116706	-5713621	-5020932	-5806205	7	8	5	12	7	4	0	3	2
CDIF630erm_00326	CDIF630erm_00326	putative signaling protein	CytoplasmicMembrane	Signal transduction	Other					26.6703	27.0061	28.0947	26.8303	27.0465	27.1608	NaN	27.6953	NaN	-5894670	-4283730	-2859743	-4918034	-4875962	-4443891	-320136	2997353	-5912021	11	10	12	10	9	6	1	4	0
CDIF630erm_00332	CDIF630erm_00332	putative hydrolase, HAD superfamily, subfamily IA	Cytoplasmic	Unknown function	Enzymes of unknown specificity	x	x			28.9481	28.4564	27.6263	27.5824	27.5362	27.5463	27.5568	27.2108	27.3606	27961200	14075890	8338915	-3335201	5155422	392901	9143449	-2556318	8939908	10	11	10	5	9	5	6	3	6
CDIF630erm_00333	CDIF630erm_00333	putative nucleotide-diphospho-sugar transferase	Cytoplasmic	Cell envelope	Biosynthesis and degradation of surface polysaccharides and lipopolysaccharides	x	x	x		30.1284	29.8276	29.4807	30.3845	30.5442	30.8714	29.6399	27.6172	29.8845	48148200	29537100	12546300	41164150	94537810	83031700	80986320	1437951	56551820	10	11	10	11	12	11	9	6	6
CDIF630erm_00334	CDIF630erm_00334	putative alkaline-phosphatase	Unknown	Unknown function	Unknown function		x			30.0826	30.1559	30.3069	31.2775	30.7371	30.8067	31.5457	31.4364	30.4193	6980200	17406880	12383400	50544780	25406330	42914580	22263430	35007580	14818020	25	24	24	27	20	18	14	13	6
CDIF630erm_00337	CDIF630erm_00337	transposase IS200/IS605-like OrfA	Cytoplasmic	Mobile and extrachromosomal element functions	Transposon functions					25.0086	24.7517	24.0745	26.5217	NaN	NaN	NaN	NaN	NaN	-5118800	-6033554	-5883743	-2950326	-5616460	-4994583	-5713621	-2853840	-5912021	2	2	3	3	1	1	0	1	0
CDIF630erm_00340	PurE	5-(carboxyamino)imidazole ribonucleotide mutase	Cytoplasmic	Purines, pyrimidines, nucleosides, and nucleotides	Purine ribonucleotide biosynthesis					25.7182	25.3072	25.8234	25.0797	25.4814	25.8078	NaN	NaN	NaN	-1918100	-5266946	-4981629	-4503763	-5706786	-5514666	-5713621	-5848637	-5774099	6	5	5	4	3	3	0	0	1
CDIF630erm_00341	PurC2	phosphoribosylaminoimidazole-succinocarboxamide synthase	Cytoplasmic	Purines, pyrimidines, nucleosides, and nucleotides	Purine ribonucleotide biosynthesis	x	x			28.5112	28.4445	28.6353	26.7323	27.4035	NaN	29.5057	28.9258	28.1667	8187200	14587720	9392706	-1691738	-3341661	-6094287	107349800	45647140	27688100	11	10	8	6	4	1	4	4	5
CDIF630erm_00342	PurF	amidophosphoribosyltransferase	Cytoplasmic	Purines, pyrimidines, nucleosides, and nucleotides	Purine ribonucleotide biosynthesis					27.0364	26.9151	26.7478	26.6127	27.2232	26.4059	26.896	NaN	26.3253	-3293500	-3343876	-4526826	-2667325	-1975892	-4614581	-3911850	-5645622	-4374474	7	8	7	7	9	4	2	1	4
CDIF630erm_00343	PurG	phosphoribosylformylglycinamidine cyclo-ligase	Cytoplasmic	Purines, pyrimidines, nucleosides, and nucleotides	Purine ribonucleotide biosynthesis					25.8831	25.7758	26.527	26.3154	26.5463	25.7066	NaN	NaN	NaN	-5203200	-5679810	-5066900	-2373743	-1905544	-4333859	-5713621	-5848637	-5802479	8	6	6	5	5	3	0	0	1
CDIF630erm_00344	PurN	phosphoribosylglycinamide formyltransferase	Cytoplasmic	Purines, pyrimidines, nucleosides, and nucleotides	Purine ribonucleotide biosynthesis					22.332	22.5704	NaN	NaN	NaN	NaN	NaN	NaN	NaN	-6221210	-6232180	-6429031	-6677498	-6577091	-6456996	-5713621	-5848637	-5912021	2	2	1	0	0	0	0	0	0
CDIF630erm_00346	PurD	phosphoribosylamine-glycine ligase	Cytoplasmic	Purines, pyrimidines, nucleosides, and nucleotides	Purine ribonucleotide biosynthesis					NaN	NaN	NaN	NaN	NaN	NaN	NaN	24.3572	23.5693	-6745800	-5902064	-6130891	-6087097	-6577091	-5571877	-5713621	-4027482	-5450397	0	2	2	2	0	2	1	2	2
CDIF630erm_00347	PurL	phosphoribosylformylglycinamidine synthase	Cytoplasmic	Purines, pyrimidines, nucleosides, and nucleotides	Purine ribonucleotide biosynthesis		x			28.4497	28.5226	28.0335	29.5696	29.751	28.8639	26.9527	27.0648	29.3872	-5631300	-4916634	-5385002	1063224	602590	-5307475	-5184126	8146810	-3014877	23	22	19	34	34	15	5	7	15
CDIF630erm_00348	CDIF630erm_00348	putative lytic transglycosylase	Unknown	Cell envelope	Biosynthesis and degradation of surface polysaccharides and lipopolysaccharides					27.5417	27.9832	28.0481	27.4268	28.0394	27.4902	27.81	28.4174	29.1486	7251200	6578503	1462276	221684	3039854	1750174	5217388	12677410	84914990	11	10	10	9	10	6	3	8	11
CDIF630erm_00350	FliN1	flagellar motor switch protein FliN	Cytoplasmic	Cellular processes	Chemotaxis and motility					29.8728	29.8229	29.8855	29.56	29.5422	30.0034	29.9292	30.0716	30.3238	29726200	23964000	21771240	25666760	21219550	38884670	44753660	29185160	14857110	8	8	8	8	6	6	4	4	2
CDIF630erm_00351	FlgM	negative regulator of flagellin synthesis (anti-sigma-d factor)	Unknown	Cellular processes	Chemotaxis and motility					23.2598	25.8416	NaN	NaN	NaN	NaN	NaN	NaN	NaN	-5788900	-534740	-6358731	-6677498	-6577091	-6456996	-5713621	-5848637	-5912021	2	2	1	0	0	0	0	0	0
CDIF630erm_00352	CDIF630erm_00352	putative flagellar biosynthesis protein	Cytoplasmic	Cellular processes	Chemotaxis and motility	x	x	x		27.8058	27.8208	28.0597	29.5158	29.6007	29.1887	28.7727	28.8345	28.8055	956500	3462983	1082970	17277520	5578240	13278990	269421	9137700	1812288	11	11	12	14	11	7	5	3	2
CDIF630erm_00353	FlgK	flagellar hook-associated protein FlgK (or HAP1)	Unknown	Cellular processes	Chemotaxis and motility	x	x	x		30.3488	31.3002	32.2267	33.9438	34.1309	34.2654	30.5249	30.8249	30.3758	5453200	43225080	78479070	320023400	315948000	537574600	16812650	26475010	17690570	25	31	33	44	44	44	12	19	17
CDIF630erm_00354	FlgL	flagellar hook-associated protein FlgL (or HAP3)	Extracellular	Cellular processes	Chemotaxis and motility	x	x	x		28.4988	29.0099	30.6142	30.7134	31.3681	30.9036	29.2496	29.0631	28.1211	655500	5001756	45440470	23709670	129826800	89777480	32438600	12499240	2553647	7	10	14	15	16	15	11	7	5
CDIF630erm_00355	FliW	flagellar assembly factor FliW	Cytoplasmic	Cell envelope	Surface structures					29.7908	30.2417	30.2164	29.8708	28.8977	31.0765	28.6116	29.8685	29.8569	55684200	34273120	21730390	28977270	14004290	50654140	6592439	26385100	13287050	6	5	5	5	4	4	3	2	2
CDIF630erm_00356	CsrA	carbon storage regulator CsrA	Unknown	Regulatory functions	RNA interactions				x	26.9988	27.4983	27.5436	NaN	NaN	NaN	NaN	NaN	NaN	-1974800	-5443.35	25773.4	-4563316	-6324956	-5055535	-5713621	-5848637	-5912021	2	2	2	1	1	1	0	0	0
CDIF630erm_00357	FliS1	flagellar protein FliS	Cytoplasmic	Cellular processes	Chemotaxis and motility	x	x			29.9603	29.6252	29.9683	31.3737	31.1845	30.9232	31.122	30.2685	30.8543	66121200	30390690	31043340	131473500	49294810	136647000	24679320	58970710	36586070	7	7	7	7	6	7	5	4	4
CDIF630erm_00358	FliS2	flagellar protein FliS	Unknown	Cellular processes	Chemotaxis and motility					30.0951	28.9516	27.6464	29.9655	29.0889	30.4029	NaN	NaN	NaN	11877200	1190073	-3061207	36474540	8990351	85554510	-5131600	-1771855	-4206786	6	6	5	7	6	8	1	1	1
CDIF630erm_00359	FliD	flagellar hook-associated protein 2 FliD (or HAP2)	Extracellular	Cellular processes	Chemotaxis and motility	x	x	x		28.0755	28.8189	30.7259	31.9352	31.4713	32.4519	29.0543	28.2975	28.2633	-4560400	6913665	33727670	108682000	75178360	206379700	874088	30321200	2422572	13	21	27	35	29	31	11	13	10
CDIF630erm_00360	FliT	flagellar protein FliT	Cytoplasmic	Unknown function	Unknown function		x			27.4864	28.2453	27.2982	26.0527	25.0054	26.6424	NaN	NaN	NaN	2208800	2451718	926870	-4079292	-6107768	-1128015	-5713621	-4325750	-5731776	8	7	7	5	3	4	0	1	1
CDIF630erm_00361	FliC	flagellin C	Unknown	Cellular processes	Chemotaxis and motility		x	x		36.7694	38.1171	38.2992	38.8774	39.0488	39.0938	38.2769	37.7136	37.3474	3358754000	5618400000	7770155000	9239568000	19488840000	24988590000	19107130000	11866310000	7776183000	26	35	31	35	33	31	26	24	26
CDIF630erm_00362	CDIF630erm_00362	flagellin N-acetylglucosamine transferase	Cytoplasmic	Cell envelope	Biosynthesis and degradation of surface polysaccharides and lipopolysaccharides	x	x	x		34.2999	34.0798	33.6941	35.756	35.6822	35.3497	34.1663	34.0769	33.6993	115004200	229755100	107705100	740765300	565137100	691137200	161594300	268350600	162087300	54	54	49	58	51	51	24	34	30
CDIF630erm_00363	CDIF630erm_00363	phosphothreonine phosphatase	Cytoplasmic	Unknown function	Enzymes of unknown specificity					33.0286	32.8772	32.1465	32.3595	32.8891	32.3671	31.4058	32.7234	33.2344	610944200	394199100	184636400	319623800	368800300	323947200	152552000	145314800	907483100	15	15	12	12	12	9	6	8	11
CDIF630erm_00364	CDIF630erm_00364	flagellin phosphothreonine transferase	Cytoplasmic	Energy metabolism	Sugars					35.0147	34.6534	33.9429	33.7031	34.1311	33.3025	34.5606	33.6367	34.8435	1161654000	742800500	500205000	578451100	854324000	627013800	2356376000	749329500	2319929000	17	17	15	14	17	15	14	12	16
CDIF630erm_00365	CDIF630erm_00365	flagellin methyltransferase	Cytoplasmic	Cell envelope	Biosynthesis and degradation of surface polysaccharides and lipopolysaccharides					32.7276	32.7241	32.0759	32.4577	33.1999	32.5186	33.7006	32.9724	33.8923	337304200	311795500	154987200	216131900	421245900	317585300	1235617000	342021700	1241411000	18	16	15	17	13	11	11	8	17
CDIF630erm_00366	CDIF630erm_00366	flagellin phosphotransferase	Cytoplasmic	Cell envelope	Biosynthesis and degradation of murein sacculus and peptidoglycan		x	x		31.2256	32.0359	32.1268	32.3379	32.558	32.4204	31.683	31.6037	32.0585	35708200	112423600	86264580	214809400	184467900	265374000	56857390	99258510	126920900	18	20	19	18	18	17	10	14	14
CDIF630erm_00368	FlgB	flagellar basal-body rod protein FlgB	Unknown	Cellular processes	Chemotaxis and motility		x		x	26.9628	27.4655	28.5489	30.0313	29.2361	30.2572	NaN	NaN	NaN	-2331900	-397826	4059556	31620340	15114560	42313500	-5713621	-5848637	-5912021	4	5	5	5	4	4	0	0	0
CDIF630erm_00369	FlgC	flagellar basal-body rod protein FlgC	Cytoplasmic	Cellular processes	Chemotaxis and motility	x	x	x		27.7129	28.416	29.5085	32.1915	31.5339	31.646	27.144	27.047	27.79	2371400	4040022	12341090	80776510	37473640	92383660	-1533230	3089707	-1593623	7	9	9	9	8	8	2	2	4
CDIF630erm_00370	FliE	flagellar hook-basal body complex protein FliE	Cytoplasmic	Cellular processes	Chemotaxis and motility		x		x	26.7378	26.4075	27.6048	30.1041	28.717	29.193	NaN	NaN	NaN	-4343100	-4341208	-4000783	17052980	2957804	23067730	-5713621	-5848637	-5912021	6	6	6	12	7	9	0	0	0
CDIF630erm_00371	FliF	flagellar M-ring protein FliF	CytoplasmicMembrane	Cellular processes	Chemotaxis and motility	x		x		33.944	34.1666	35.2201	35.5445	35.0982	35.7121	33.7695	33.8491	34.0282	223644200	469032600	725163100	1353773000	799032400	1540162000	290611500	462523800	341001200	38	40	40	44	38	38	17	30	26
CDIF630erm_00372	FliG	flagellar motor switch protein FliG	Cytoplasmic	Cellular processes	Chemotaxis and motility	x	x			29.7442	29.463	30.0215	30.5338	30.5474	30.5753	30.9906	30.3918	31.206	22645200	16406340	23683820	36543520	45444350	50634390	85199130	126237500	65428000	21	18	17	20	20	16	11	12	14
CDIF630erm_00373	FliH	flagellar assembly protein FliH	Cytoplasmic	Cellular processes	Chemotaxis and motility		x			28.7836	28.4955	28.1939	29.7162	30.0172	29.673	29.9251	28.3387	30.4205	17200200	7626090	3692892	23703010	45651330	27929080	61622200	5602730	83750040	17	16	12	17	17	15	8	5	13
CDIF630erm_00374	FliI	ATP synthase subunit beta FliI	Cytoplasmic	Cellular processes	Chemotaxis and motility	x	x			28.0145	27.8032	28.4114	29.4173	29.6806	29.5682	29.4897	29.7288	30.037	-2668100	-622018	-1238629	17849330	19027840	19961370	8142215	18713960	16615810	17	17	13	22	20	16	10	12	13
CDIF630erm_00375	FliJ	flagellar protein FliJ	Cytoplasmic	Cellular processes	Chemotaxis and motility					NaN	NaN	NaN	25.0529	24.8857	NaN	NaN	NaN	NaN	-6546250	-6758146	-6722046	-1843788	-4627615	-6217131	-5713621	-3456574	-5490019	1	0	0	4	3	1	0	1	1
CDIF630erm_00378	FlgE	flagellar hook protein FlgE (Distal rod protein)	Extracellular	Cellular processes	Chemotaxis and motility	x	x	x		33.2531	33.8332	35.0819	36.2039	36.7168	36.4988	34.2028	34.1951	33.7043	362774200	471550500	1046164000	1793762000	4440810000	4368434000	1527903000	1217853000	642640900	25	29	28	36	33	30	23	21	21
CDIF630erm_00379	FlbD	flagellar protein FlbD	Unknown	Cellular processes	Chemotaxis and motility		x			28.8343	29.1136	29.7665	27.1176	23.9284	25.204	NaN	NaN	NaN	4539200	7386689	7339587	-4284052	-5460805	-2928008	-5713621	-1029097	-4148820	8	9	7	4	3	3	0	1	1
CDIF630erm_00380	MotA	flagellar motor rotation protein MotA	CytoplasmicMembrane	Cellular processes	Chemotaxis and motility					32.2164	32.3392	32.3411	32.3026	32.3572	32.6432	32.3455	31.5584	32.2536	246184200	237003200	286772000	249745900	375948300	411609400	387582200	94670220	294388200	11	13	11	12	11	10	9	8	9
CDIF630erm_00381	MotB	flagellar motor rotation protein MotB (chemotaxis protein MotB)	CytoplasmicMembrane	Cellular processes	Chemotaxis and motility	x		x		31.1688	31.414	31.585	31.5892	31.4015	31.7062	30.6793	29.044	29.799	130434200	125508200	160219700	133010100	185754100	181715400	151316400	9910535	68162250	13	14	13	12	12	11	6	5	9
CDIF630erm_00382	FliL	flagellar basal body-associated protein FliL	Unknown	Cellular processes	Chemotaxis and motility					32.7655	32.9537	33.4353	33.1817	32.0003	32.8823	32.8629	32.0145	31.996	264654200	243541300	344149400	397646000	252821000	477356200	127700200	145146400	49799620	13	12	13	11	9	10	5	5	5
CDIF630erm_00383	FliZ	flagellar protein FliZ	Unknown	Cellular processes	Chemotaxis and motility					30.2853	30.1503	30.4817	31.4165	29.5657	31.5804	30.2655	28.8847	28.7713	55614200	44050600	36761150	124613700	66179440	187757000	14963770	15449680	681308	8	9	7	7	7	6	2	3	3
CDIF630erm_00384	FliP	flagellar biosynthesis protein FliP	CytoplasmicMembrane	Cellular processes	Chemotaxis and motility					30.9799	31.0851	31.9168	30.9877	30.8391	30.5221	29.8645	30.9655	30.4438	39381200	78824890	131246500	126778200	88602090	99129440	13978710	35600940	25732490	7	8	8	7	7	6	2	3	4
CDIF630erm_00386	FlhB	bifunctional flagellar biosynthesis protein FliR/FlhB	CytoplasmicMembrane	Cellular processes	Chemotaxis and motility					28.0086	27.7746	27.1782	28.1184	27.4187	27.5948	NaN	NaN	27.2409	-4891000	-4971990	-4416919	-1213860	-2183527	-3563515	-5713621	-5569660	-5010123	3	3	4	5	3	5	0	1	2
CDIF630erm_00387	FlhA	flagellar biosynthesis protein FlhA	CytoplasmicMembrane	Cellular processes	Chemotaxis and motility	x		x		33.6559	33.395	33.6567	33.1675	33.1302	33.5172	32.7516	32.8555	32.6064	55332200	109427000	184130600	92188930	59823860	113566500	63196230	93919940	71972770	26	28	27	22	21	20	14	15	14
CDIF630erm_00388	FlhF	flagellar biosynthesis regulator FlhF (flagella-associated GTP-binding protein)	CytoplasmicMembrane	Cellular processes	Chemotaxis and motility	x	x	x		31.9381	31.069	31.0835	32.487	32.4892	32.5878	32.1807	32.1038	32.4292	98264200	50220550	46199080	183588200	195666700	238720000	182254200	151398800	110228200	26	25	25	26	26	23	16	16	19
CDIF630erm_00389	FlhG	flagellar number regulator FlhG	CytoplasmicMembrane	Cellular processes	Chemotaxis and motility					27.7491	28.0779	28.2012	27.8178	27.6417	28.0411	28.5932	27.531	28.4998	4583200	4325653	7532158	4436524	7586626	4056684	21216000	1690169	12060470	11	11	12	8	9	7	7	3	6
CDIF630erm_00391	CDIF630erm_00391	putative flagellar protein	Cytoplasmic	Cellular processes	Chemotaxis and motility					30.8997	30.8763	30.9342	31.2931	30.3691	30.3586	31.4413	30.0974	30.7296	77480200	55195150	68991530	105604100	36310160	88138750	31834620	62063360	15873240	9	11	8	9	9	7	4	6	4
CDIF630erm_00392	FlgG1	flagellar basal-body rod protein FlgG	Extracellular	Cellular processes	Chemotaxis and motility	x	x	x		27.96	29.1091	29.6178	30.3009	30.5863	30.7599	28.4002	28.1208	29.0626	9751200	18592320	24552340	14835670	106579200	93884180	29990370	4060001	42041050	11	11	12	11	13	13	6	5	7
CDIF630erm_00393	FlgG2	flagellar basal body rod protein FlgG	Extracellular	Cellular processes	Chemotaxis and motility	x	x	x		27.3224	28.1315	29.2545	30.749	30.8423	31.3705	28.3539	27.1951	27.3105	4106200	9833536	17139320	13000360	103267700	108029500	30550460	2104211	6771596	11	13	13	13	14	14	10	4	6
CDIF630erm_00394	FliM	flagellar motor switch protein FliM	CytoplasmicMembrane	Cellular processes	Chemotaxis and motility		x	x		27.8392	28.2166	29.0955	27.7634	27.7889	27.3293	29.5494	28.6564	28.7379	13076200	12495020	27402490	6856014	11904250	2523252	56076730	23006400	14714310	11	11	14	9	8	3	7	5	5
CDIF630erm_00395	FliN2	flagellar motor switch protein FliN	CytoplasmicMembrane	Cellular processes	Chemotaxis and motility	x	x			28.7396	27.6444	28.0701	29.0782	29.0762	29.1438	28.9237	29.3511	29.276	21285200	11752050	14145230	27631470	14496590	8984066	18296600	44144950	26420180	7	6	5	5	4	4	4	4	4
CDIF630erm_00396	CDIF630erm_00396	tetratricopeptide repeat protein	Unknown	Unknown function	Unknown function			x		29.9584	29.5083	30.958	30.6157	30.3909	30.3054	28.5573	29.6693	28.9966	18228200	15911030	30366910	35487910	21688190	16640690	7810780	12531930	8458144	12	13	12	15	14	10	4	6	6
CDIF630erm_00397	HtpG	heat shock protein HtpG	Cytoplasmic	Cellular processes	Adaptations to atypical conditions					30.9969	31.1279	31.952	31.2425	31.0609	30.6316	30.8667	31.2203	30.7656	18893200	50052140	51655260	44936100	30925140	28488480	21865010	31377150	13598960	29	33	30	30	24	23	17	17	21
CDIF630erm_00403	CDIF630erm_00403	pyridoxamine 5'-phosphate oxidase family protein	Cytoplasmic	Unknown function	Unknown function		x			25.3526	25.3776	25.0862	26.0518	25.7396	26.16	NaN	NaN	NaN	-5053100	-5696693	-5951110	-4698133	-4560202	-4387682	-5713621	-3752279	-5912021	3	3	3	3	2	3	0	1	0
CDIF630erm_00405	CDIF630erm_00405	hypothetical protein	Unknown	Unknown function	Unknown function	x		x		26.2395	26.8861	27.4445	27.7257	27.5667	27.1999	25.2567	24.5056	25.7426	-9300	848637	3286353	-338943	8592666	5090160	-4732575	-4969163	-3427121	8	8	10	9	7	8	2	2	3
CDIF630erm_00407	CDIF630erm_00407	transcription antiterminator, PTS operon regulator	Cytoplasmic	Signal transduction	PTS	x	x	x		26.8227	26.2741	25.0487	27.3632	27.3315	27.8927	NaN	26.7801	26.8005	-5648800	-6231322	-6621536	-3618393	-4869808	-4476591	-5245913	-2985710	-4536402	9	7	3	15	9	11	1	5	6
CDIF630erm_00418	CDIF630erm_00418	ABC-type transport system, bacitracin/multidrug-family ATP-binding protein	CytoplasmicMembrane	Cellular processes	Toxin production and resistance	x	x			24.2288	24.3743	24.2508	24.7499	24.6728	25.0268	25.2707	NaN	NaN	-5281300	-5995330	-5139918	-6293523	-5121943	-4626100	-1899297	-2847783	-5214373	5	4	4	4	4	3	2	2	2
CDIF630erm_00420	CDIF630erm_00420	putative iron-sulfur-binding protein	Unknown	Unknown function	Unknown function		x			27.2858	27.2872	26.4854	26.0638	25.7236	25.6907	26.2525	NaN	NaN	-12400	616417	-3326991	-4551786	-4905881	-5296781	5091166	-5848637	-4961068	11	11	7	5	4	4	2	0	1
CDIF630erm_00425	RbsB1	ABC-type transport system, ribose-specific extracellular solute-binding protein	Unknown	Transport and binding proteins	Carbohydrates, organic alcohols, and acids		x			27.2743	27.2799	27.3805	27.6274	28.2078	27.6619	NaN	NaN	NaN	3115800	-3141918	181873	-3696318	8666585	29743310	-5713621	-5611690	-5912021	2	3	3	2	2	2	0	1	0
CDIF630erm_00431	CDIF630erm_00431	hypothetical protein	CytoplasmicMembrane	Unknown function	Unknown function					25.9359	25.4129	25.9269	25.9368	27.2765	25.616	26.7153	25.0429	NaN	-2069400	-3615766	-3177337	-3387595	2601513	-4264569	3088235	-3385746	-5131753	8	9	7	7	8	2	3	3	1
CDIF630erm_00432	CDIF630erm_00432	putative chaperone protein	Cytoplasmic	Protein fate	Protein folding and stabilization		x			25.9506	26.4978	26.0566	27.0883	26.85	26.8813	NaN	NaN	NaN	-4272000	-2363520	2429509	2985116	-719763	-939767	-3746371	-5848637	-5912021	3	3	3	4	2	2	1	0	0
CDIF630erm_00434	CDIF630erm_00434	putative hydrolase, HAD superfamily, subfamily IB	Cytoplasmic	Unknown function	Enzymes of unknown specificity					NaN	NaN	NaN	25.788	26.0582	25.2106	NaN	NaN	NaN	-6391970	-6539877	-6497026	-5856432	-1174988	-4962855	-2496280	-4466007	-1830978	1	1	2	2	4	2	1	1	1
CDIF630erm_00438	CDIF630erm_00438	cadmium, zinc and cobalt-transporting ATPase	CytoplasmicMembrane	Transport and binding proteins	Cations and iron carrying compounds					31.4092	31.4379	32.2772	31.7857	31.716	32.1505	31.7451	31.5681	31.292	10526200	25393800	104481000	27497310	20910560	38702580	20635120	40514520	35514320	36	36	39	34	23	24	20	22	22
CDIF630erm_00445	CDIF630erm_00445	ABC-type transport system, bacitracin/multidrug-family ATP-binding protein	CytoplasmicMembrane	Cellular processes	Toxin production and resistance					26.189	25.923	26.7869	25.2737	26.003	26.1392	NaN	NaN	NaN	-3567400	-2987475	-447374	-5115508	-2507619	1285757	-1381215	-5848637	-5912021	6	5	4	5	4	4	1	0	0
CDIF630erm_00446	CDIF630erm_00446	two-component sensor histidine kinase	Cytoplasmic	Signal transduction	Two-component systems					25.6034	26.1747	26.8176	26.5416	26.9508	27.4028	27.2044	NaN	26.3	-3089600	-1935525	-318737	-4386559	-3778045	-2793966	8523308	-5848637	-5131600	4	6	6	5	4	3	4	0	2
CDIF630erm_00447	CDIF630erm_00447	two-component response regulator	Cytoplasmic	Signal transduction	Two-component systems			x		25.5591	25.9644	24.731	24.8256	25.0268	NaN	25.5229	NaN	26.2819	-572400	-1401154	-3480772	-6233210	-4569954	-4197519	-172274	-5848637	3230897	4	3	4	3	2	1	2	0	3
CDIF630erm_00449	CDIF630erm_00449	putative ATPase	Cytoplasmic	Protein fate	Protein folding and stabilization			x		NaN	NaN	NaN	23.938	24.0144	NaN	25.0254	25.7133	NaN	-6447730	-6558043	-6691858	-5647808	-5950153	-6060114	-4123889	-3106629	-5465428	3	1	1	2	4	2	2	3	1
CDIF630erm_00450	CDIF630erm_00450	VWF protein	Cytoplasmic	Unknown function	Unknown function					NaN	NaN	NaN	25.0539	25.0394	NaN	NaN	NaN	NaN	-6710050	-6742280	-6651512	-6083080	-5753255	-6456996	-5713621	-5284812	-5912021	1	1	1	2	2	0	0	2	0
CDIF630erm_00452	CbiM	cobalt transport protein	CytoplasmicMembrane	Biosynthesis of cofactors, prosthetic groups, and carriers	Heme, porphyrin, and cobalamin					30.1499	30.5351	30.366	29.9739	30.6201	30.7349	30.4269	30.3098	30.4632	138364200	124748700	146516000	117753900	82407660	129093900	84545500	54173180	79571260	2	2	2	2	2	2	2	2	2
CDIF630erm_00454	CbiQ1	ABC-type transport system, cobalt-specific permease	CytoplasmicMembrane	Transport and binding proteins	Cations and iron carrying compounds				x	27.11	26.8048	26.3126	26.7445	26.5531	27.1215	NaN	NaN	NaN	-4670600	-800449	-1115643	-1232613	-3418353	-2540612	-5713621	-5848637	-5912021	2	2	2	2	2	2	0	0	0
CDIF630erm_00455	CbiO	ABC-type transport system, cobalt-specific ATP-binding protein	CytoplasmicMembrane	Transport and binding proteins	Cations and iron carrying compounds		x	x		29.1522	29.1859	30.3768	30.7767	30.4964	31.1784	30.3907	29.1078	28.825	43798200	38667370	47317550	32640750	69057850	91495190	148487000	19970960	25169550	14	14	12	12	12	10	8	6	8
CDIF630erm_00456	PcrA	ATP-dependent DNA helicase PcrA	Cytoplasmic	DNA metabolism	DNA replication, recombination, and repair	x	x	x		31.9676	31.8398	31.3269	32.4727	32.2262	32.308	32.595	32.7969	32.6442	20246200	34112140	14747740	95200210	63532390	56443440	54986570	117356700	57540150	48	44	39	52	44	37	22	34	29
CDIF630erm_00457	ApeB	aminipeptidase ApeB	Cytoplasmic	Protein fate	Degradation of proteins, peptides, and glycopeptides		x			25.2248	25.1096	25.3287	27.6267	27.5317	25.5656	NaN	26.1995	25.6713	-6027850	-6048435	-5975047	1677849	-2329998	-4907382	-5096718	1440893	-4495087	3	3	3	7	6	4	1	2	2
CDIF630erm_00458	CDIF630erm_00458	phospholipase, patatin family	Unknown	Unknown function	Unknown function	x	x			28.2305	27.7029	28.2996	29.0711	29.418	29.1222	29.7853	29.4963	29.3469	12439200	3786587	3071899	7603839	45027450	8305320	55114760	32898960	19011850	11	11	11	9	8	9	9	8	8
CDIF630erm_00459	PpiB	peptidyl-prolyl cis-trans isomerase B	Cytoplasmic	Protein fate	Protein folding and stabilization	x	x	x		30.4762	30.12	29.8921	28.3738	27.7387	28.3958	29.982	31.0063	31.2351	63118200	49198560	26980390	11310140	-1381486	1412556	29725910	105031900	63966170	8	8	7	7	5	5	6	6	5
CDIF630erm_00461	CDIF630erm_00461	cobalt-dependent inorganic pyrophosphatase	Cytoplasmic	Energy metabolism	Other	x	x	x		31.1878	30.8162	30.9293	31.8322	32.0669	31.2057	30.21	30.2257	29.9589	28617200	38565830	29830050	72294500	73729540	40802000	6330294	13120390	9705017	30	27	27	31	28	19	10	11	14
CDIF630erm_00464	CDIF630erm_00464	ABC-type transport system, ATP-binding protein	CytoplasmicMembrane	Transport and binding proteins	Amino acids, peptides and amines		x			27.3924	27.3226	26.8801	28.0977	27.4914	27.9138	27.2221	27.2164	28.6278	9158200	2833109	-181591	-1284753	7543013	4546768	10681680	-2515312	31798500	10	10	8	6	9	8	7	4	9
CDIF630erm_00465	CDIF630erm_00465	ABC-type transport system, permease	CytoplasmicMembrane	Transport and binding proteins	Amino acids, peptides and amines					27.1189	27.7036	28.7204	NaN	28.037	26.0288	NaN	NaN	27.0412	-6540240	-2994671	1221076	-6565697	-3087822	-6163479	-5713621	-5707487	-5646825	8	12	16	4	3	4	0	1	2
CDIF630erm_00466	CDIF630erm_00466	two-component sensor histidine kinase	CytoplasmicMembrane	Signal transduction	Two-component systems					25.122	NaN	25.6521	NaN	NaN	NaN	NaN	NaN	NaN	-5170000	-4760991	-3235751	-5234043	-4192557	-4499246	-5162003	-4700950	-5248739	2	1	2	1	1	1	1	1	1
CDIF630erm_00467	CDIF630erm_00467	two-component response regulator	Cytoplasmic	Signal transduction	Two-component systems	x	x	x		24.6689	24.8937	NaN	25.1684	NaN	25.2512	25.3783	NaN	25.6673	-4670400	-4607840	-5604944	-5920673	-4723242	-5445170	1456466	-5491167	1102344	4	6	2	3	3	2	2	1	4
CDIF630erm_00468	CDIF630erm_00468	uncharacterized protein	CytoplasmicMembrane	Unknown function	Unknown function					26.2866	26.9967	26.9946	26.4704	25.5046	NaN	NaN	NaN	NaN	-6331600	-5914833	-6144085	-6338580	-6493040	-6417343	-5626590	-5848637	-5787492	11	16	15	9	4	1	1	0	3
CDIF630erm_00469	CDIF630erm_00469	uncharacterized protein	Cytoplasmic	Unknown function	Unknown function		x			28.2035	28.1609	28.0117	27.4135	NaN	26.9208	NaN	NaN	NaN	3998200	-714555	65163	-3607940	-6577091	-3375502	-5713621	-5848637	-5857037	8	8	8	6	0	2	0	0	1
CDIF630erm_00471	CDIF630erm_00471	putative zinc- or iron-chelating domain containing protein	Cytoplasmic	Unknown function	Unknown function		x			26.833	26.6846	26.3909	25.1429	26.0923	26.0038	26.1848	NaN	25.6188	5758200	3240917	2117310	-3304601	2242340	-666970	13002880	-3943583	-899738	7	7	7	4	4	4	5	1	4
CDIF630erm_00473	YjbM	GTP pyrophosphokinase YjbM	Cytoplasmic	Purines, pyrimidines, nucleosides, and nucleotides	Other	x		x		26.0841	26.5884	26.4611	26.0075	26.175	26.185	NaN	27.2695	27.1781	-3812000	-4831109	-4808228	-2914531	1104058	-2593050	4593320	3610815	1606129	4	4	3	4	5	2	1	3	3
CDIF630erm_00478	CDIF630erm_00478	putative hydrolase, HAD superfamily	Cytoplasmic	Unknown function	Enzymes of unknown specificity					30.9466	31.1956	31.3494	31.538	31.9033	30.5393	32.0677	31.1587	31.6625	131504200	116163200	118637000	150297600	180239800	196128300	143486700	48955560	266136300	9	9	10	10	10	9	6	7	9
CDIF630erm_00493	CDIF630erm_00493	ABC-type transport system, multidrug-family ATP-binding protein Tn916-like, CTn1	CytoplasmicMembrane	Cellular processes	Toxin production and resistance					24.1076	24.2425	24.8132	NaN	NaN	NaN	NaN	NaN	NaN	-6004820	-5760168	-4175644	-6567205	-5959896	-6108104	-5713621	-5398462	-5617212	3	4	4	1	2	2	0	1	1
CDIF630erm_00513	CDIF630erm_00513	putative cell surface protein	Cellwall	Cell envelope	Other					NaN	NaN	NaN	25.7257	NaN	27.5457	NaN	NaN	NaN	-6739969	-6758146	-6689630	-6124305	-3429998	-2912394	-5410297	34889890	-5912021	1	0	1	2	1	2	1	1	0
CDIF630erm_00519	AsnB1	asparagine synthetase [glutamine-hydrolyzing]	Cytoplasmic	Amino acid biosynthesis	Aspartate family		x			NaN	23.568	23.5407	24.4037	24.0299	NaN	NaN	NaN	NaN	-6454110	-6563376	-6543173	-5750884	-6229556	-6153914	-5713621	-5600600	-5758995	2	2	3	5	4	1	0	1	1
CDIF630erm_00520	CDIF630erm_00520	putative radical SAM-family protein	Cytoplasmic	Energy metabolism	Anaerobic	x	x	x		28.0919	28.4689	28.3463	26.2207	26.3114	26.3777	27.8622	28.7357	28.7084	30355200	25783450	8946291	-2838760	-4816029	439408	27025930	21574500	63158220	7	8	5	4	4	4	4	3	5
CDIF630erm_00522	LdhA	(R)-2-hydroxyisocaproate dehydrogenase	Cytoplasmic	Energy metabolism	Other	x	x	x		34.5685	34.2695	33.8516	32.9614	33.2826	33.5569	34.9566	35.4728	35.1727	935784200	713288100	502685100	391409300	566778100	668475700	2645082000	2558938000	1612767000	27	27	25	22	20	19	23	21	21
CDIF630erm_00523	HadA	isocaprenoyl-CoA:2-hydroxyisocaproate CoA-transferase	Cytoplasmic	Fatty acid and phospholipid metabolis	Other	x		x		32.7657	32.6436	32.7119	32.9534	33.0703	32.7491	33.2791	33.9016	33.544	223134200	219510400	148339600	242500800	243995100	214150000	341192800	516236600	429838100	31	33	28	29	30	28	20	25	26
CDIF630erm_00524	HadI	activator of 2-hydroxyisocaproyl-CoA dehydratase	Cytoplasmic	Unknown function	Unknown function		x	x		33.7464	33.3368	32.7877	32.1275	32.1042	32.5417	33.762	32.6709	33.3472	822504200	602569100	351142300	160920300	284022300	266098000	1073572000	443415500	760624100	14	18	13	12	13	10	10	11	15
CDIF630erm_00525	HadB	2-hydroxyisocaproyl-CoA dehydratase, alpha subunit	Cytoplasmic	Fatty acid and phospholipid metabolism	Other	x	x			34.0407	33.3653	33.7215	32.9562	33.2275	32.6802	32.5431	32.9283	33.0424	618394200	499684300	361169600	345069800	413565800	289329800	264073600	376233700	312719300	24	26	21	20	22	19	14	14	16
CDIF630erm_00526	HadC	2-hydroxyisocaproyl-CoA dehydratase, beta subunit	Cytoplasmic	Energy metabolism	Anaerobic	x		x		31.2957	31.3718	31.4198	31.4	31.6704	31.167	31.8338	32.1949	32.115	86047200	93139440	53420500	71866360	81794130	87289770	110221900	169539500	177013700	27	25	23	21	21	15	10	14	16
CDIF630erm_00527	AcdB	isocaproyl-CoA dehydrogenase, catalytic subunit	Cytoplasmic	Fatty acid and phospholipid metabolis	Degradation					36.1649	36.0554	35.2651	35.9978	36.3679	35.4886	36.2622	36.4173	36.5386	2504954000	1989652000	1507945000	2979055000	3421242000	2437494000	4310687000	6366558000	4722659000	31	34	25	26	24	24	25	25	26
CDIF630erm_00528	EtfB1	isocaproyl-CoA dehydrogenase, electron transfer flavoprotein beta subunit	Cytoplasmic	Energy metabolism	Electron transport	x		x		35.3006	35.1952	34.4159	34.2448	34.5719	34.5384	36.2743	35.579	36.859	1792354000	1273347000	770290900	922726600	1639568000	1266580000	5614024000	3232390000	7632631000	22	23	19	17	19	18	22	21	23
CDIF630erm_00529	EtfA1	isocaproyl-CoA dehydrogenase, electron transfer flavoprotein alpha subunit	Cytoplasmic	Energy metabolism	Electron transport	x	x	x		35.8534	35.3475	35.1627	34.8257	35.1145	35.1179	36.1904	36.1398	36.3212	1380254000	899633300	756820700	1197405000	1658861000	1624051000	2645659000	2802983000	1694614000	30	32	25	29	23	20	20	21	21
CDIF630erm_00530	CDIF630erm_00530	transcriptional regulator, sigma-54-dependent	Cytoplasmic	Regulatory functions	Small molecule interactions	x	x			27.8888	28.0214	27.5407	29.1658	28.8056	29.1474	29.8992	29.3848	29.1444	171000	5284910	355479	23328140	12639740	31715490	6695219	16824370	10861700	15	15	12	19	17	12	6	7	12
CDIF630erm_00531	Fba	fructose-1,6-bisphosphate aldolase	Cytoplasmic	Energy metabolism	Glycolysis/gluconeogenesis			x		30.9981	31.5735	32.221	32.2282	32.9358	31.7089	31.4851	30.3726	30.1213	71567200	82861690	113010600	202450300	291503000	92706140	101826300	27805570	12197260	16	20	18	21	21	17	9	7	8
CDIF630erm_00534	CDIF630erm_00534	putative RNA methyltransferase	Cytoplasmic	Protein synthesis	tRNA and rRNA base modification		x			25.3811	25.0609	25.1055	26.6875	27.0863	26.3549	25.3677	NaN	26.7148	-6373560	-6086843	-5873203	-3233392	-2025694	-3414684	-5283652	-5848637	-1222062	2	3	4	5	6	5	2	0	4
CDIF630erm_00556	CDIF630erm_00556	transcriptional regulator, AraC family Tn1549-like, CTn2	Cytoplasmic	Transcription	Transcription factors				x	24.6708	24.8123	24.7432	NaN	NaN	NaN	NaN	NaN	NaN	-6506570	-6284178	-5897394	-4709220	-6577091	-6379991	-5713621	-5848637	-5912021	2	2	2	2	0	1	0	0	0
CDIF630erm_00565	CDIF630erm_00565	putative recombinase Tn1549-like, CTn2	Cytoplasmic	DNA metabolism	DNA replication, recombination, and repair		x			25.1503	24.9995	25.2367	27.2866	27.032	26.6755	NaN	NaN	NaN	-6426160	-6293183	-6493705	-1549446	-2164875	-3897500	-4309251	-5437673	-5268397	3	3	2	11	7	6	2	1	2
CDIF630erm_00579	CDIF630erm_00579	putative dioxygenase	Cytoplasmic	Cellular processes	Other		x			26.9525	27.0404	26.632	25.5867	25.792	26.2473	NaN	NaN	NaN	-2247600	-3396464	-4340980	-4542726	-5898486	-3751556	-4961213	-5848637	-5912021	4	4	4	4	3	3	1	0	0
CDIF630erm_00580	CDIF630erm_00580	putative hydrolase, NUDIX family	Cytoplasmic	Energy metabolism	Other					24.0973	24.2731	24.1523	NaN	NaN	NaN	25.4444	NaN	NaN	-5805430	-5770225	-6110916	-6195552	-4655356	-4105840	-1398330	-5848637	-2140342	2	3	3	1	2	1	2	0	1
CDIF630erm_00586	CDIF630erm_00586	uncharacterized protein, beta-lactamase/transpeptidase-like	Unknown	Cellular processes	Toxin production and resistance					25.5091	24.5082	25.8217	25.57	25.5638	26.1663	NaN	NaN	NaN	-6268780	-6097554	-3852462	-6293441	-4159513	-3139529	-3883032	-4898242	-5912021	3	4	6	6	5	4	1	1	0
CDIF630erm_00587	CDIF630erm_00587	ABC-type transport system, ATP-binding protein	CytoplasmicMembrane	Transport and binding proteins	Amino acids, peptides and amines					24.2646	24.5231	24.6237	24.4563	24.4844	24.7547	NaN	24.7494	25.1116	-5181300	-5107982	-5310715	-6534610	-5362148	-4965064	-5713621	-5036705	-831510	4	5	5	2	2	3	0	2	3
CDIF630erm_00588	CDIF630erm_00588	ABC-type transport system, permease	CytoplasmicMembrane	Transport and binding proteins	Amino acids, peptides and amines					NaN	25.4965	25.2149	25.8542	NaN	NaN	NaN	NaN	NaN	-6690430	-6599837	-6119786	-5915668	-6577091	-6254964	-5713621	-5848637	-5912021	3	4	5	5	0	2	0	0	0
CDIF630erm_00589	CDIF630erm_00589	two-component sensor histidine kinase	CytoplasmicMembrane	Signal transduction	Two-component systems					24.3937	NaN	NaN	24.9036	24.9822	NaN	NaN	NaN	NaN	-6073000	-6253686	-6204956	-5386600	-5330714	-6358898	-5713621	-5459318	-5912021	3	1	2	5	3	1	0	1	0
CDIF630erm_00600	CDIF630erm_00600	putative reductase	Unknown	Energy metabolism	Electron transport		x			25.4109	24.9625	24.9	26.5368	26.793	27.3764	25.4677	NaN	27.1014	-4543300	-5762844	-5681390	-2966165	2202054	3552998	-2390952	-4178782	6066613	3	2	3	3	4	3	2	1	3
CDIF630erm_00602	CDIF630erm_00602	putative iron-sulfur protein	Unknown	Energy metabolism	Electron transport					NaN	23.4209	23.3023	23.1206	25.2209	NaN	NaN	NaN	NaN	-6044090	-6302824	-6247528	-6032239	-4133476	-5183980	-5713621	-4301449	-2133861	2	2	2	3	3	1	0	1	3
CDIF630erm_00606	SpaF	ABC-type transport system, lantibiotic/multidrug-family ATP-binding protein	CytoplasmicMembrane	Cellular processes	Toxin production and resistance					23.7682	23.6983	NaN	NaN	NaN	24.0887	NaN	NaN	NaN	-6026140	-5070155	-5778915	-6670849	-6577091	-5334048	-5713621	-4780538	3501467	2	5	2	1	0	2	0	1	2
CDIF630erm_00609	SpaR	two-component response regulator	Cytoplasmic	Signal transduction	Two-component systems					23.8673	NaN	22.9059	NaN	NaN	NaN	NaN	NaN	NaN	-5459600	-5753618	-6410319	-6616294	-6173628	-6456996	-5713621	-5741072	-4580147	2	1	2	1	1	0	0	1	1
CDIF630erm_00610	SpaK	two-component sensor histidine kinase	CytoplasmicMembrane	Signal transduction	Two-component systems					26.4239	26.5465	26.9475	26.5215	25.7982	NaN	NaN	25.6729	NaN	-6384030	-5847373	-2446274	-4267644	-5860888	-6456996	-5713621	-4817443	-5912021	4	4	8	5	4	1	0	2	0
CDIF630erm_00615	CDIF630erm_00615	omega-amidase NIT2	Cytoplasmic	Central intermediary metabolism	Nitrogen metabolism					25.0804	24.6912	NaN	24.7016	NaN	NaN	25.8921	24.9588	24.9343	-4219300	-5987534	-6121888	-6565609	-6336043	-6456996	5858663	-5182345	-3920195	6	3	1	2	1	0	3	2	2
CDIF630erm_00618	PurC1	phosphoribosylaminoimidazole-succinocarboxamide synthetase	Cytoplasmic	Purines, pyrimidines, nucleosides, and nucleotides	Purine ribonucleotide biosynthesis	x		x		29.0753	28.9241	28.3504	27.5646	28.673	28.1855	29.0996	29.468	29.3441	37543200	23856680	15639600	1640743	13277670	5005042	78508060	6256731	68141960	11	9	8	8	8	7	8	6	10
CDIF630erm_00620	CDIF630erm_00620	PTS system, ribitol-specific IIA component	Cytoplasmic	Signal transduction	PTS				x	27.0673	27.4745	25.1522	23.8448	23.6675	NaN	NaN	NaN	NaN	-2084200	386344	-5540053	-6457198	-6384283	-6456996	-5713621	-5848637	-5912021	3	3	3	2	2	0	0	0	0
CDIF630erm_00621	CDIF630erm_00621	PTS system, ribitol-specific IIB component	Cytoplasmic	Signal transduction	PTS					27.4605	26.1436	26.6831	26.2882	26.4443	25.7005	NaN	26.5079	27.7779	-71400	-2731545	-1291900	-1732855	-4058489	-3746755	-5713621	-1407466	-3364025	5	4	5	4	4	2	1	3	2
CDIF630erm_00626	CwpV	putative hemagglutinin/adhesin	Cellwall	Cellular processes	Pathogenesis	x	x			31.8463	31.9669	32.4797	27.6731	27.5398	27.2603	28.5385	29.0448	26.8781	31067200	52998430	51373220	-4830669	-4334862	-4769893	945802	2713260	-4579426	44	47	44	17	12	9	7	9	4
CDIF630erm_00627	DacF1	serine-type D-ala-D-ala carboxypeptidase	CytoplasmicMembrane	Cell envelope	Biosynthesis and degradation of murein sacculus and peptidoglycan					24.6832	24.4799	25.0141	24.531	25.2425	NaN	NaN	NaN	NaN	-6093950	-6088209	-5752947	-5607578	-5304771	-5901178	-5713621	-5848637	-5851300	2	3	2	4	3	1	0	0	1
CDIF630erm_00628	CDIF630erm_00628	transcription antiterminator	Cytoplasmic	Regulatory functions	DNA interactions		x			27.663	27.2379	26.5694	29.1275	28.7603	29.0536	27.2454	29.3613	29.2131	-6084070	-5725017	-6447603	5273308	16484	-1744314	-4645067	7417128	-2845118	14	13	10	20	21	14	6	13	8
CDIF630erm_00629	CDIF630erm_00629	putative membrane protein	CytoplasmicMembrane	Unknown function	Unknown function					27.5684	28.4201	28.6084	27.8923	27.8265	28.6217	NaN	26.924	NaN	-2486300	6110432	10351670	2319114	2869101	5365036	-4516006	1328434	-630518	4	7	5	5	4	2	1	2	1
CDIF630erm_00631	CDIF630erm_00631	hypothetical protein	CytoplasmicMembrane	Unknown function	Unknown function					34.4546	35.1797	34.4412	33.6818	34.1794	34.9407	34.0624	33.3038	33.5888	428354200	619236400	862005400	624167400	602525500	1016010000	886339900	831778300	451964700	8	11	10	8	8	9	8	6	6
CDIF630erm_00632	CDIF630erm_00632	two-component sensor histidine kinase	CytoplasmicMembrane	Signal transduction	Two-component systems					28.5957	28.846	29.0181	29.2356	28.3663	29.4352	29.2576	28.1221	29.0067	-3645700	7549317	10815590	2418063	384454	4072040	5045665	-1269771	4848300	9	13	14	11	9	10	4	3	3
CDIF630erm_00633	CDIF630erm_00633	two-component response regulator	Cytoplasmic	Signal transduction	Two-component systems	x				26.1428	25.7008	25.6953	26.1366	26.2782	26.0659	26.2825	NaN	26.8178	905700	-1103431	-2739296	-3835633	1575736	-684056	539535	-4418059	2772433	8	8	6	5	4	4	2	1	3
CDIF630erm_00635	CDIF630erm_00635	putative signaling protein	CytoplasmicMembrane	Signal transduction	Other		x			24.2918	24.1379	23.9561	25.131	24.6288	25.1331	NaN	NaN	NaN	-6524070	-6658939	-6701466	-6185321	-6346893	-6363022	-5672725	-5709323	-5719184	5	3	2	7	6	2	1	1	2
CDIF630erm_00637	YqjE	putative peptidase YqjE	Cytoplasmic	Protein fate	Degradation of proteins, peptides, and glycopeptides					NaN	NaN	NaN	24.7154	NaN	25.457	NaN	NaN	24.5105	-6445590	-6758146	-6722046	-6029641	-6094787	-2936257	-4362733	-3517616	-5132725	2	0	0	2	1	2	1	1	2
CDIF630erm_00643	CDIF630erm_00643	putative membrane protein	CytoplasmicMembrane	Hypothetical proteins	Domain	x		x		30.0602	30.3371	30.1611	30.2658	29.9977	30.3575	28.4373	27.8732	28.7368	59825200	71844270	97663230	31021420	17545020	65793210	27648380	26790480	66706440	4	3	4	4	4	4	4	3	4
CDIF630erm_00646	CheY	chemotaxis protein CheY	Cytoplasmic	Cellular processes	Chemotaxis and motility	x	x	x		28.1587	27.7047	27.7979	27.2538	27.6649	25.657	NaN	29.0127	28.1582	3477200	-757363	-2943237	-336409	-3184018	-1769649	-3472040	8512795	-3005606	3	4	3	4	2	2	1	2	2
CDIF630erm_00648	CheD	chemoreceptor glutamine deamidase CheD	Unknown	Cellular processes	Chemotaxis and motility	x		x		27.7091	26.8345	27.3724	27.3687	27.5401	27.3359	NaN	28.0405	28.688	1403000	19701000	-2180935	183150	-5140879	-5129538	-4559206	15649100	640047	5	5	5	5	3	2	1	4	1
CDIF630erm_00649	CheW1	purine-binding chemotaxis protein CheW	Cytoplasmic	Cellular processes	Chemotaxis and motility		x	x		27.2054	25.5037	27.0304	27.6904	27.7076	27.6418	26.3664	NaN	25.1711	-371400	-3879077	-1310631	5651502	1145304	-2211252	-4251113	-3231044	-614497	6	5	6	7	6	4	2	1	2
CDIF630erm_00650	CDIF630erm_00650	putative CheY-like chemosensory protein	Cytoplasmic	Signal transduction	Other	x	x	x		27.7681	27.2858	26.6676	28.3451	28.4922	28.9351	29.1435	29.2299	29.09	1087100	-1212390	-2891172	9934845	14731660	16731950	18764300	20796430	10195050	10	10	9	11	10	7	5	5	6
CDIF630erm_00651	CDIF630erm_00651	putative methyl-accepting chemotaxis receptor, MCP family	CytoplasmicMembrane	Cellular processes	Chemotaxis and motility					32.2806	32.062	32.906	32.8707	32.6558	32.6862	32.8133	32.5918	32.2501	90685200	160295700	204647200	215660900	140959100	247846000	154226500	177859500	132061700	29	33	33	32	28	25	20	19	20
CDIF630erm_00652	CheA	chemotaxis protein CheA	Cytoplasmic	Cellular processes	Chemotaxis and motility	x	x			28.6101	28.8284	28.6638	29.4473	29.0295	29.6008	29.9167	29.5845	29.3683	-4989300	3056000	-3143876	8614734	1955385	698710	2936722	82402590	-599735	16	18	18	21	17	14	7	13	10
CDIF630erm_00653	CheW2	chemotaxis protein CheW	Cytoplasmic	Cellular processes	Chemotaxis and motility				x	25.8826	25.4874	25.7531	26.0031	NaN	25.8638	NaN	NaN	NaN	-4300500	-4290557	-4260407	-4507185	-6197213	-2551218	-5713621	-5848637	-5912021	4	4	5	4	1	3	0	0	0
CDIF630erm_00654	CheR	methyl-accepting chemotaxis proteins methyltransferase, MCP family	Cytoplasmic	Cellular processes	Chemotaxis and motility		x			26.2862	25.8917	24.7907	26.8242	27.3195	27.0536	27.1778	25.8533	27.5769	-1125200	-4356708	-5823996	56610.2	6043931	3608720	9160772	-1933547	8820406	7	5	3	6	8	5	3	2	4
CDIF630erm_00657	ArcB	Delta(1)-pyrroline-2-carboxylate reductase	Cytoplasmic	Amino acid biosynthesis	Glutamate family					25.9961	24.8285	24.6919	25.4103	26.345	25.2996	25.919	25.9371	27.1326	-3725200	-5947881	-5710216	-5121780	-318790	-5557176	2181928	1860167	-55806.1	6	2	2	4	4	4	2	2	3
CDIF630erm_00658	CDIF630erm_00658	putative lipoprotein	Unknown	Unknown function	Unknown function					32.055	32.5974	33.4872	31.8822	32.5429	32.3776	32.5302	32.0908	31.8317	229674200	258425500	257234700	134675100	233631600	247473000	89736440	100945400	257282600	22	22	23	20	21	16	12	14	20
CDIF630erm_00659	CDIF630erm_00659	putative membrane protein, DUF975 family	CytoplasmicMembrane	Unknown function	Unknown function	x		x		30.1472	30.806	30.9491	30.8589	30.7193	31.262	27.9668	27.55	NaN	37408200	96994620	165583500	273879000	269386300	368019600	11919650	6064339	-2825856	5	6	6	6	6	6	4	2	1
CDIF630erm_00666	CDIF630erm_00666	putative RNA methyltransferase	Cytoplasmic	Protein synthesis	tRNA and rRNA base modification					23.471	24.1831	23.5434	NaN	NaN	NaN	NaN	NaN	24.322	-6433190	-6079610	-6369169	-6677498	-6091577	-6164773	-5713621	-5432268	-4749095	3	3	2	0	1	1	0	1	2
CDIF630erm_00667	SpsB1	signal peptidase IB	CytoplasmicMembrane	Protein fate	Protein and peptide secretion and trafficking					32.3817	32.3169	32.3261	33.2399	32.1421	31.4298	30.3192	32.0813	30.6196	140064200	119424100	166064900	302750200	148025800	92723690	20273660	187307500	19010340	13	15	12	15	13	11	6	5	4
CDIF630erm_00670	ThrS/udk	fusion protein threonine-tRNA ligase/uridine kinase	Cytoplasmic	Purines, pyrimidines, nucleosides, and nucleotides	Nucleotide and nucleoside interconversions	x	x			24.6778	24.6001	24.0851	24.9251	24.7581	24.7309	25.4196	NaN	NaN	-6143670	-5200057	-5775487	-5944367	-6449783	-6277954	-4539336	-5287957	-5912021	5	5	6	3	3	2	2	1	0
CDIF630erm_00671	GlsA	glutaminase	Cytoplasmic	Energy metabolism	Amino acids and amines					24.3242	25.4052	25.1267	25.3218	26.8804	26.0732	NaN	25.0272	26.2478	-5528700	-6176566	-5983047	-5157702	-4794726	-5009931	-5713621	-2270677	-3005066	3	2	3	3	2	2	0	3	3
CDIF630erm_00672	CDIF630erm_00672	transcriptional regulator, ArsR family	Cytoplasmic	Regulatory functions	DNA interactions					NaN	NaN	NaN	23.7863	NaN	23.4935	NaN	NaN	25.2566	-6162560	-5950547	-6337397	-4836308	-2116209	-6193036	-2940494	-5848637	89363	1	1	2	3	3	2	1	0	3
CDIF630erm_00673	Nfo	endonuclease IV	Cytoplasmic	DNA metabolism	DNA replication, recombination, and repair				x	27.6258	27.151	26.7246	NaN	NaN	NaN	NaN	NaN	NaN	11865200	-381126	-243815	-6677498	-6577091	-6456996	401533	-5848637	-5912021	9	8	8	0	0	0	1	0	0
CDIF630erm_00674	CDIF630erm_00674	putative aldo/keto reductase	Cytoplasmic	Energy metabolism	Electron transport	x		x		29.6957	29.0614	29.0283	29.1375	29.609	29.1154	29.7871	30.6509	30.3592	39211200	21833320	13725070	13720590	22812510	19138720	60821910	79873880	35566180	17	16	13	13	8	7	6	7	7
CDIF630erm_00677	CDIF630erm_00677	putative ATP-dependent protease	Cytoplasmic	Protein fate	Degradation of proteins, peptides, and glycopeptides	x				NaN	NaN	25.8177	26.0614	26.5007	26.2951	NaN	28.7668	NaN	-6713634	-6735739	-6697682	-5249375	-6069659	-5669948	-5109893	110584600	-5516815	1	1	2	7	4	5	1	4	2
CDIF630erm_00679	TrmL	putative tRNA (cytidine(34)-2'-o)-methyltransferase	Cytoplasmic	Protein synthesis	tRNA and rRNA base modification					24.6105	24.2399	24.233	22.5639	NaN	NaN	NaN	24.2196	NaN	-6138070	-6408997	-6040191	-6489324	-6488539	-6388364	-5713621	-4755585	-5912021	2	2	2	2	1	1	0	1	0
CDIF630erm_00680	CDIF630erm_00680	uncharacterized protein, DegV family	Cytoplasmic	Unknown function	Unknown function	x	x			26.064	26.0627	26.6925	24.4002	24.6265	25.0885	25.7236	NaN	24.5122	204100	-2304197	-1795847	-5878542	-5141163	-5067466	12472.1	-5727218	-4578706	6	6	5	2	2	2	2	1	2
CDIF630erm_00681	CDIF630erm_00681	basic membrane lipoprotein	Unknown	Transport and binding proteins	Unknown substrate			x		29.2409	29.4402	30.319	29.7876	29.4933	29.3932	28.5421	29.2747	28.4958	17917200	11500270	44973630	18316480	26144050	28712250	14200430	22141700	8643785	14	16	19	16	15	13	4	5	4
CDIF630erm_00685	CDIF630erm_00685	putative membrane protein	Cytoplasmic	Hypothetical proteins	Domain					30.5367	28.896	31.1292	31.1433	29.9041	28.9994	29.5578	29.0397	NaN	57341200	39240280	94035500	100780400	80604030	37276650	13803170	20822590	-5425734	3	5	3	4	4	4	3	3	1
CDIF630erm_00687	ThrS	threonine-tRNA ligase	Cytoplasmic	Protein synthesis	tRNA aminoacylation	x	x			33.2766	33.2119	32.8961	32.5796	32.6	32.1536	32.931	32.6524	32.4465	145834200	232099600	121963200	132049100	93088980	68763540	96227710	168787600	103569200	44	47	40	37	30	24	21	20	21
CDIF630erm_00690	CDIF630erm_00690	HD domain protein	Cytoplasmic	Unknown function	Enzymes of unknown specificity					25.213	25.4356	25.8332	NaN	NaN	NaN	NaN	NaN	NaN	0	-4497312	-4709687	-6677498	-6556200	-5487298	-5713621	-4851202	-3049891	5	5	5	0	1	1	0	1	1
CDIF630erm_00693	GapN	glyceraldehyde-3-phosphate dehydrogenase (NADP+)	Cytoplasmic	Energy metabolism	Glycolysis/gluconeogenesis	x	x	x		29.9672	29.4299	29.2471	29.2412	28.9214	27.8068	24.4807	26.4979	26.0533	17177200	17925300	11918990	7042970	3531417	1083493	-5336832	-5246579	-4189954	26	22	21	18	16	9	4	2	4
CDIF630erm_00695	CDIF630erm_00695	putative PEP-utilizing enzyme	CytoplasmicMembrane	Energy metabolism	Sugars					23.6158	23.6779	NaN	NaN	NaN	NaN	NaN	NaN	NaN	-6669780	-6613058	-6516690	-6446598	-6577091	-6350932	-5713621	-5848637	-5912021	2	3	3	1	0	1	0	0	0
CDIF630erm_00696	CDIF630erm_00696	putative diguanylate kinase signaling protein	CytoplasmicMembrane	Signal transduction	Other					NaN	24.7384	24.8737	NaN	NaN	NaN	NaN	NaN	NaN	-6686811	-6452221	-6014095	-6558513	-6577091	-6301059	-5713621	-5848637	-5638076	1	2	2	1	0	1	0	0	1
CDIF630erm_00700	CDIF630erm_00700	uncharacterized protein	Unknown	Unknown function	Unknown function		x		x	26.7881	26.4799	27.0052	26.2577	23.9631	24.1028	NaN	NaN	NaN	-2653500	-3344245	-4277614	-5107019	-5918719	-3284472	-5713621	-5848637	-5912021	3	3	2	2	2	3	0	0	0
CDIF630erm_00702	CDIF630erm_00702	uncharacterized protein with P-loop containing nucleoside triphosphate hydrolase domain	Unknown	Unknown function	Unknown function					NaN	NaN	NaN	24.4272	23.7574	NaN	NaN	NaN	NaN	-6666766	-6556835	-6661337	-6342046	-6483142	-6252056	-5520948	-5032232	-5828952	2	3	3	3	2	3	1	3	1
CDIF630erm_00708	CDIF630erm_00708	uncharacterized protein, YbdN-like	Unknown	Biosynthesis of cofactors, prosthetic	Other	x	x			25.5938	25.4233	24.2104	28.3069	28.2942	28.4462	25.8187	27.7984	29.1651	-5865420	-5400446	-5808757	6558692	5014237	10587260	-3222752	223449	10458850	9	7	5	12	14	11	5	3	11
CDIF630erm_00709	CDIF630erm_00709	uncharacterized protein, YbdM-like	Cytoplasmic	Transcription	Transcription factors					NaN	25.2508	25.1081	26.8804	25.2144	24.9697	26.2575	NaN	NaN	-5798520	-6171353	-6190473	-1025889	-4601104	-4827016	-2812515	-639312	-4824523	1	3	2	5	3	2	2	1	1
CDIF630erm_00719	CDIF630erm_00719	chloride ion channel protein (C-terminal component)	CytoplasmicMembrane	Signal transduction	Other					26.2493	26.3898	26.3754	26.001	NaN	26.6374	NaN	26.06	NaN	-5474300	-2493053	433285	-5341808	-5902945	-3714643	-5713621	-2919309	-4868538	2	3	3	3	1	2	0	1	1
CDIF630erm_00721	CDIF630erm_00721	uncharacterized protein, GrpB/dephospho-CoA kinase family	Cytoplasmic	Unknown function	Unknown function	x	x	x		25.7587	25.2677	NaN	26.7782	27.143	26.6157	26.3577	NaN	26.4535	-4004600	-6035629	-6575446	-520135	1349100	601307	-1932015	-3738603	6923416	3	2	1	3	5	2	2	1	3
CDIF630erm_00728	CDIF630erm_00728	transcriptional regulator, MerR family	Cytoplasmic	Regulatory functions	DNA interactions		x			24.9371	24.2016	NaN	25.0155	25.1775	NaN	NaN	NaN	NaN	-5277200	-6212760	-6420421	-5268635	-2669333	-5994949	-290312	-5243969	-5340414	4	3	1	3	4	1	2	1	1
CDIF630erm_00729	CDIF630erm_00729	putative membrane protein	CytoplasmicMembrane	Cell envelope	Other		x			28.1252	27.9639	28.1548	28.3797	28.2117	NaN	NaN	NaN	NaN	-931800	2154448	12826410	9463411	6687768	5591651	-5713621	-4999428	-5912021	2	2	4	3	2	1	0	1	0
CDIF630erm_00756	CDIF630erm_00756	transcriptional regulatory protein, YcbL-like	Cytoplasmic	Signal transduction	Two-component systems	x	x			26.0686	26.4899	25.9086	27.3382	27.4387	27.6211	27.3684	28.0643	28.2966	-2041700	-3163507	-5401320	-4213793	2898668	883643	15425700	1055293	16020550	9	7	3	7	6	8	6	5	5
CDIF630erm_00757	CDIF630erm_00757	two-component sensor histidine kinase	CytoplasmicMembrane	Signal transduction	Two-component systems					24.7881	24.9875	26.0114	25.6763	25.7157	NaN	NaN	NaN	NaN	-5004100	-5521030	-5613706	-5135275	-4145974	-6321057	-5252079	-5848637	-5801678	5	3	2	3	3	1	1	0	1
CDIF630erm_00758	CDIF630erm_00758	ABC-type transport system, lantibiotic/multidrug-family ATP-binding protein	CytoplasmicMembrane	Cellular processes	Toxin production and resistance					26.7966	26.7158	26.9539	26.4854	27.4589	27.3059	NaN	NaN	NaN	-804700	-3032682	-2367732	3783842	-3093787	3272418	-5313678	-5601229	-5196722	8	7	7	6	5	3	1	1	1
CDIF630erm_00760	CDIF630erm_00760	transcriptional regulator, GntR family	Cytoplasmic	Regulatory functions	DNA interactions					26.7099	26.621	25.7634	26.0535	25.42	NaN	25.3632	26.2955	26.1193	353800	-2126965	-3901289	-2467887	-4319429	-6082385	-4754748	-2715913	1321580	10	7	8	7	4	1	2	4	4
CDIF630erm_00765	CDIF630erm_00765	ABC-type transport system, multidrug-family ATP-binding protein	CytoplasmicMembrane	Cellular processes	Toxin production and resistance	x				26.3787	25.5236	25.7295	26.1081	25.961	26.4468	27.445	NaN	26.4896	-595300	-4965901	-4112658	-2628362	-2508092	-1371648	12320380	-2564705	-2707673	7	7	4	6	6	4	4	1	3
CDIF630erm_00768	CDIF630erm_00768	putative beta-lactamase-like protein	Cytoplasmic	Cell envelope	Biosynthesis and degradation of murein sacculus and peptidoglycan					26.8323	26.3034	27.1235	25.8576	26.5969	26.9013	NaN	26.3017	26.1451	283700	-1433815	-977925	-2696151	1099696	2766978	3714498	-3513422	4087700	6	5	3	5	5	6	1	4	5
CDIF630erm_00776	ToxA	toxin A	Extracellular	Cellular processes	Pathogenesis					30.1343	29.8663	29.5065	30.1435	29.7457	29.2965	30.8753	29.4122	30.6708	-5027000	-3487340	-2755804	-715772	-2069342	-3850335	-3291083	9366870	-2239533	56	58	56	51	36	28	21	15	27
CDIF630erm_00777	TcdC	negative regulator of toxin gene expression	Cytoplasmic	Cellular processes	Toxin production and resistance					25.3022	NaN	NaN	25.2653	26.613	25.3176	26.2725	NaN	NaN	-5487300	-5099771	-5625769	-2291826	2586729	-590963	5505286	-5450464	-5818546	2	1	2	5	3	5	2	1	1
CDIF630erm_00783	CDIF630erm_00783	two-component response regulator	Cytoplasmic	Signal transduction	Two-component systems				x	23.9409	24.418	23.6513	NaN	NaN	NaN	23.9902	NaN	23.9032	-4467900	-5420559	-5605832	-6677498	-6577091	-6456996	-4289872	-5848637	-4931455	4	4	3	0	0	0	2	0	2
CDIF630erm_00787	CDIF630erm_00787	uncharacterized protein, GTP cyclohydrolase-like	Cytoplasmic	Unknown function	Unknown function	x	x			32.1915	32.2313	31.6806	30.2044	30.4749	30.3722	31.7047	30.3304	31.3092	233234200	189296200	135311900	71347830	104095600	50757240	313280700	62429510	195420000	17	16	15	11	11	10	11	7	13
CDIF630erm_00788	CDIF630erm_00788	putative methyltransferase	Cytoplasmic	Fatty acid and phospholipid metabolis	Biosynthesis					29.0998	29.2362	28.2763	28.0653	28.3359	27.8379	28.4637	28.1067	28.8551	20703200	18508120	9003188	8057196	19361220	8229636	27504030	594174	28708000	6	6	4	5	5	5	4	3	4
CDIF630erm_00789	CDIF630erm_00789	putative acetyltransferase	Cytoplasmic	Central intermediary metabolism	Other		x		x	24.5781	22.9748	23.5068	26.0044	26.2304	NaN	NaN	NaN	NaN	-5670100	-6558025	-6339289	-2242917	-3701353	-6456996	-5713621	-5848637	-5912021	4	3	3	4	4	0	0	0	0
CDIF630erm_00798	InfC	translation initiation factor IF-3	Cytoplasmic	Protein synthesis	Translation factors					23.1759	24.5426	NaN	NaN	NaN	NaN	NaN	NaN	NaN	-5312000	-4584405	-4454126	-4967070	-5491387	-4987542	-5713621	-5848637	-5912021	2	2	2	1	1	1	0	0	0
CDIF630erm_00799	RpmI	50S ribosomal protein L35	Cytoplasmic	Protein synthesis	Ribosomal proteins: synthesis and modification					25.7694	27.1234	27.822	26.0901	25.5806	24.377	NaN	NaN	NaN	3461200	11116400	5412903	3135442	-2981969	-111358	-5713621	-4815159	-5912021	4	4	3	4	2	3	0	1	0
CDIF630erm_00800	RplT	50S ribosomal protein L20	Cytoplasmic	Protein synthesis	Ribosomal proteins: synthesis and modification	x	x	x		29.8106	30.6526	29.4328	29.1704	29.1497	29.0032	30.919	30.7517	30.8837	104234200	148011900	46315790	69911170	50925460	17767620	65738000	141421200	55444740	7	6	7	6	5	4	4	4	4
CDIF630erm_00805	CDIF630erm_00805	putative metallo-hydrolase/oxidoreductase	Cytoplasmic	Unknown function	Unknown function		x			27.6686	27.3009	28.0947	26.645	27.155	26.9658	27.9288	26.8972	NaN	6756200	2630031	5723156	-3262154	1689276	-747984	16583990	517512	-4276274	6	5	5	4	4	5	4	3	1
CDIF630erm_00810	KtrB	ktr system potassium uptake protein B	CytoplasmicMembrane	Transport and binding proteins	Cations and iron carrying compounds					26.7792	26.9698	26.3702	26.2031	NaN	27.2713	NaN	NaN	NaN	-5250600	-3527473	-670554	-2765143	-1828001	-137872	-3217844	-4471016	-4455213	2	2	4	2	1	2	1	1	1
CDIF630erm_00811	KtrC	ktr system potassium uptake protein C	CytoplasmicMembrane	Transport and binding proteins	Cations and iron carrying compounds					25.5528	25.6754	24.6446	25.6382	25.5311	25.5455	NaN	NaN	25.2146	-2417500	-3087946	-4536159	-2364240	-2294871	-3791268	-4310510	-5848637	-734840	4	4	4	3	3	2	1	0	2
CDIF630erm_00814	PheS	phenylalanyl-tRNA synthetase alpha chain	Cytoplasmic	Protein synthesis	tRNA aminoacylation	x	x	x		29.0563	28.2705	29.1725	29.5228	29.832	29.599	28.6603	27.7714	27.7245	6762200	1215829	902069	20907700	32266040	16021840	3991771	2740395	-644200	12	10	11	13	14	12	3	4	4
CDIF630erm_00815	PheT	phenylalanyl-tRNA synthetase subunit beta	Cytoplasmic	Protein synthesis	tRNA aminoacylation					29.9946	29.86	29.781	30.9438	30.9584	29.9001	29.5159	30.4165	30.0666	-2606700	672800	-1616415	31268310	18719600	7114772	1175151	16472930	2843833	25	24	22	29	30	19	6	16	11
CDIF630erm_00816	CDIF630erm_00816	putative cell-division protein	Cytoplasmic	Cellular processes	Cell division					23.2871	23.2269	23.9788	NaN	NaN	NaN	NaN	NaN	NaN	-5696800	-6053002	-6386395	-6677498	-6499749	-6456996	-5713621	-5326190	-2489580	3	3	2	0	1	0	0	1	1
CDIF630erm_00818	CDIF630erm_00818	putative peptidase, U32 family	Cytoplasmic	Energy metabolism	Amino acids and amines	x				24.8999	25.3353	24.6749	25.1724	25.3736	NaN	NaN	26.3218	NaN	-6609490	-6309568	-6559833	-5259702	-6146284	-6456996	-5713621	-4935822	-5859783	6	6	4	9	3	0	0	2	1
CDIF630erm_00819	CDIF630erm_00819	putative metal-dependent phosphohydrolase	Cytoplasmic	Unknown function	Unknown function	x	x	x		30.037	29.9651	29.7466	27.1502	27.8399	26.9956	30.5419	30.988	30.9251	131354200	97093690	35778840	-145080	1972017	-1887783	81447100	68655670	309660300	10	10	7	7	5	2	6	5	8
CDIF630erm_00821	CDIF630erm_00821	putative nitroreductase-like oxidoreductase	Cytoplasmic	Energy metabolism	Anaerobic					25.7708	24.5242	24.7492	25.3409	25.7027	25.0068	NaN	NaN	NaN	2457000	-4956306	-4462189	-6435220	-2130884	-5446466	-5713621	-5848637	-5105668	7	4	4	3	3	3	0	0	1
CDIF630erm_00822	CDIF630erm_00822	putative diguanylate kinase signaling protein	CytoplasmicMembrane	Regulatory functions	Small molecule interactions		x			27.0206	27.106	27.7866	28.0411	27.9828	27.8534	28.0016	27.7585	27.6029	-6015070	-5241482	-4882897	-587037	-3405192	-3070299	-3448760	-1311709	-4398327	12	13	13	15	14	11	8	9	6
CDIF630erm_00823	PepD	cytosol non-specific dipeptidase	Cytoplasmic	Protein fate	Degradation of proteins, peptides, and glycopeptides	x		x		28.197	28.7001	29.4453	29.8443	30.0017	29.3887	26.6944	28.4293	28.6817	1771800	10199240	12209790	39654230	32512190	23043590	-3672503	10812990	13263750	10	10	9	8	8	6	3	4	4
CDIF630erm_00824	MutS2	endonuclease MutS2	Cytoplasmic	DNA metabolism	Other	x		x		28.4037	28.4105	27.7943	28.5149	27.8376	28.6493	29.0875	29.7821	29.5258	-3463200	-1237024	-4443713	3317165	682422	-147594	2284361	24018210	8186072	20	19	19	21	17	15	11	17	12
CDIF630erm_00826	ArgS	arginine-tRNA ligase	Cytoplasmic	Protein synthesis	tRNA aminoacylation			x		27.5485	28.6662	29.3224	28.9273	28.4995	28.826	25.643	26.5484	27.8356	-4803900	-1216726	3588340	8717489	741705	6461692	-4493153	-2481995	-1414143	10	19	22	22	15	9	4	5	7
CDIF630erm_00827	CDIF630erm_00827	hypothetical protein	Cytoplasmic	Unknown function	Unknown function					NaN	NaN	NaN	23.2257	23.4044	24.4507	NaN	NaN	NaN	-6219620	-6406930	-6430688	-6477781	-5993252	-5396179	-2265616	-5848637	-5912021	3	1	1	2	2	3	2	0	0
CDIF630erm_00828	CDIF630erm_00828	hypothetical protein	Extracellular	Unknown function	General				x	26.5628	26.2909	26.1035	NaN	NaN	NaN	NaN	NaN	NaN	-2643800	-4607840	-5127219	-5917442	-6064433	-5755971	-5713621	-5848637	-5912021	4	4	4	2	1	1	0	0	0
CDIF630erm_00829	CDIF630erm_00829	putative radical SAM domain-containing protein	Cytoplasmic	Energy metabolism	Electron transport	x	x	x		27.5813	26.7804	26.4481	28.8378	29.0258	28.7629	27.1822	27.2884	27.7077	-5131600	-4928259	-5861203	10103250	4212952	5823092	-3832822	-2743172	-3339182	14	10	7	24	18	13	5	6	8
CDIF630erm_00830	CDIF630erm_00830	tetratricopeptide repeat protein	Cytoplasmic	Unknown function	Unknown function	x				28.338	27.7549	28.0211	28.2433	28.6216	28.3698	28.5361	28.9732	28.7285	5453200	-234064	4046426	9496235	14611170	7618018	4620805	9756884	1449650	11	13	12	12	11	8	5	6	6
CDIF630erm_00831	Ptb2	phosphate butyryltransferase	Cytoplasmic	Energy metabolism	Fermentation			x		25.7846	25.2064	25.1089	25.1143	25.0827	25.0569	NaN	26.359	25.7422	-3628800	-5319442	-5229634	-3724067	-4721159	-5625700	-1895899	-2412100	-5151825	7	6	4	5	4	3	1	3	2
CDIF630erm_00832	CooS	anaerobic carbon monoxide dehydrogenase	Cytoplasmic	Energy metabolism	Anaerobic	x	x	x		28.5315	27.8348	28.0794	27.3767	27.5896	27.229	27.9156	27.951	27.9925	-2341200	-142450	-1038181	516627	-1540455	-1597604	-2377991	-138160	553690	16	17	13	15	11	9	6	7	10
CDIF630erm_00833	CooC	carbon monoxide dehydrogenase, accessory protein	Cytoplasmic	Energy metabolism	Anaerobic	x		x		27.1752	26.8998	27.1772	26.9379	27.4606	27.23	28.5484	27.8132	27.8024	5255200	826925	2204356	-3531978	1663035	2603104	49239000	14146910	17199030	9	9	9	7	8	9	8	6	7
CDIF630erm_00834	Fhs	formate-tetrahydrofolate ligase	Cytoplasmic	Central intermediary metabolism	One-carbon metabolism	x	x			29.7755	29.2793	29.2837	31.0628	31.1573	31.0439	31.0429	31.2447	31.1681	4900200	10725930	5392965	62903880	49633360	63540230	29750160	55593640	44428820	16	18	17	23	21	18	13	12	14
CDIF630erm_00840	CDIF630erm_00840	acetyl-CoA synthase, nickel-inserting subunit	Cytoplasmic	Energy metabolism	Anaerobic	x	x			29.4998	29.0892	28.8964	29.7217	30.0811	30.1107	30.542	29.6978	31.0574	54251200	31914600	25532210	28937310	75673620	56779090	229648200	36632360	249857000	9	10	11	11	10	9	10	6	11
CDIF630erm_00841	AcsD	corrinoid/iron-sulfur protein, small subunit	Cytoplasmic	Central intermediary metabolism	One-carbon metabolism	x		x		26.6775	26.0812	26.6595	26.4603	26.4522	26.0877	27.3239	28.2006	28.1253	-3271500	-4312238	-843700	148899	-1453254	-2401562	1208872	11150050	3299291	6	5	7	7	6	4	2	7	6
CDIF630erm_00842	AcsC	corrinoid/iron-sulfur protein, large subunit	Unknown	Central intermediary metabolism	One-carbon metabolism					26.9585	26.7538	26.92	26.9878	26.637	26.2659	25.6798	25.6309	27.448	-4582300	476244	-2788059	-2212000	-3851328	-3216125	-4876511	-4413772	-100631	8	11	9	8	5	8	2	4	7
CDIF630erm_00843	AcsE	5-methyltetrahydrofolate:corrinoid/iron-sulfur protein co-methyltransferase	Cytoplasmic	Energy metabolism	Anaerobic	x		x		29.1934	29.1029	28.0144	28.841	28.9838	29.453	29.795	30.2256	30.2684	34330200	29198630	6017362	12651660	32788640	13441990	125529100	13363940	120239300	10	10	8	8	10	8	9	6	8
CDIF630erm_00844	CdhC	acetyl-CoA synthase, subunit alpha/beta	Cytoplasmic	Energy metabolism	Chemoautotrophy	x	x	x		29.1927	29.0081	28.7745	29.6765	29.3706	29.49	29.9134	30.077	30.2618	728300	5086785	-227941	24683930	14467030	8100424	7441236	36540830	11137530	16	17	16	17	14	12	7	13	8
CDIF630erm_00846	CDIF630erm_00846	ATP-dependent reductive activator of CoFeSP	Cytoplasmic	Unknown function	Unknown function					26.9207	25.6915	24.9737	26.6058	26.66	26.5686	NaN	NaN	NaN	-5227000	-5271374	-5872314	-568348	-4098444	-2808107	-5159285	-4265220	-3691660	4	4	4	7	3	5	1	1	2
CDIF630erm_00849	LipM	octanoyltransferase	Cytoplasmic	Protein fate	Protein modification and repair		x			26.344	25.177	NaN	27.4633	NaN	27.197	NaN	NaN	26.8815	-5491500	-6124605	-6431723	2998911	8503963	-152012	-1366115	-2587305	762178	4	3	2	2	1	2	2	1	3
CDIF630erm_00850	CDIF630erm_00850	putative RNA-binding protein	Cytoplasmic	Unknown function	Unknown function					26.7457	26.8818	26.1788	27.1909	24.9903	24.9716	NaN	NaN	NaN	-2191700	-3143948	-3899574	-3769365	-5455882	-3580277	-5713621	-5484876	-5912021	2	2	2	2	2	2	0	1	0
CDIF630erm_00853	HisK	histidinol-phosphatase	Cytoplasmic	Amino acid biosynthesis	Histidine family				x	24.9817	24.4001	23.9414	NaN	NaN	NaN	NaN	NaN	NaN	-3828600	-5780742	-6209775	-6191409	-6397614	-6456996	-5713621	-5848637	-5912021	5	4	2	1	1	0	0	0	0
CDIF630erm_00854	CDIF630erm_00854	putative exported protein	Unknown	Unknown function	Unknown function					25.0922	24.3855	25.9467	24.3412	24.5289	25.2526	NaN	NaN	NaN	-5707200	-6262469	-4380537	-6113332	-4956157	-4812168	-5440121	-5848637	-5458201	3	2	3	2	4	2	1	0	1
CDIF630erm_00859	CDIF630erm_00859	transcriptional regulator, DeoR family	Unknown	Regulatory functions	DNA interactions					23.4624	24.3183	NaN	NaN	NaN	NaN	NaN	NaN	NaN	-5429600	-5375075	-6400268	-6677498	-6176487	-6456996	-5713621	-5848637	3083587	2	2	1	0	1	0	0	0	3
CDIF630erm_00861	CDIF630erm_00861	putative MotA/TolQ/ExbB proton channel	CytoplasmicMembrane	Cellular processes	Chemotaxis and motility	x		x		30.3697	30.9603	30.6994	30.3273	30.2367	30.4854	29.8976	29.5155	29.9563	19581200	43494200	76772180	53123160	58180640	66936150	60685640	37018130	40017040	8	9	11	10	6	7	4	4	5
CDIF630erm_00862	CDIF630erm_00862	putative OmpA/MotB proton channel	CytoplasmicMembrane	Cellular processes	Chemotaxis and motility		x	x		28.2454	28.2334	29.0428	29.0819	29.3851	29.2367	28.5912	27.1456	28.2676	12749200	16251140	20473810	-264819	18590980	15040570	18417860	-1482487	11043580	17	16	15	14	15	14	5	5	5
CDIF630erm_00863	CDIF630erm_00863	putative membrane protein	CytoplasmicMembrane	Cell envelope	Other					NaN	NaN	NaN	24.2313	25.7034	NaN	NaN	NaN	NaN	-5903910	-5156972	-5340811	-3624855	-3373001	-5195557	-5713621	-5848637	-5912021	1	2	1	2	2	2	0	0	0
CDIF630erm_00864	CDIF630erm_00864	putative lipoprotein	Unknown	Unknown function	Unknown function	x		x		29.9035	30.4906	30.9135	30.6848	30.4533	30.8188	28.4248	29.2518	29.7054	6612200	33527670	53663650	39846890	29980450	81039780	74486.3	9041422	6126740	29	34	35	33	32	31	10	10	13
CDIF630erm_00865	CDIF630erm_00865	putative diguanylate kinase signaling protein	CytoplasmicMembrane	Signal transduction	Other		x			27.8195	28.0753	28.7665	27.8157	27.3241	27.674	28.0756	28.1081	27.4595	-5747300	-4294801	-2501132	-2790928	-4561244	-5097928	-5133324	-2281861	-5224652	19	19	24	15	13	11	2	7	5
CDIF630erm_00866	CDIF630erm_00866	putative DNA helicase, UvrD/REP type	Cytoplasmic	DNA metabolism	DNA replication, recombination, and repair	x	x			26.4139	26.0759	26.0449	26.7929	26.7733	26.8795	27.4913	26.8841	NaN	-6282760	-6238187	-6524703	-3904879	-3912018	-5339881	-3192173	-3087525	-5713873	6	7	4	9	9	5	3	5	2
CDIF630erm_00868	CDIF630erm_00868	ABC-type transport system, aminoacid-family extracellular solute-binding protein	Unknown	Transport and binding proteins	Amino acids, peptides and amines	x	x			29.3039	30.1132	29.7967	29.0827	28.9303	29.0933	29.26	27.7367	28.5978	40055200	47396440	42692930	7339817	29256040	19586240	39440300	10150170	51145700	13	12	12	11	11	9	7	5	10
CDIF630erm_00869	CDIF630erm_00869	ABC-type transport system, aminoacid-family permease	CytoplasmicMembrane	Transport and binding proteins	Amino acids, peptides and amines					27.8847	27.2257	27.4748	27.2258	26.8287	26.5087	26.8231	NaN	NaN	6053200	4151468	2975127	3065036	-1658427	-3788411	-3629466	-5427096	-5681506	5	5	6	5	3	2	2	1	1
CDIF630erm_00870	CDIF630erm_00870	ABC-type transport system, aminoacid-family ATP-binding protein	CytoplasmicMembrane	Transport and binding proteins	Amino acids, peptides and amines					28.7412	29.3813	29.2261	28.6148	28.7018	29.2966	28.4282	28.7149	29.0686	29146200	31808930	31512620	5357510	33109450	37792180	23644600	5574779	59598730	10	10	11	9	8	8	4	4	5
CDIF630erm_00871	IscS1	cysteine desulfurase	Cytoplasmic	Biosynthesis of cofactors, prosthetic	Thiamine					26.5288	25.9932	25.9286	NaN	NaN	25.5342	26.1694	26.3959	NaN	-3773100	-3997631	-3942369	-5903440	-6390664	-4939670	-491026	-160061	-3917135	5	5	5	1	1	3	1	2	2
CDIF630erm_00872	ThiI	sulfurtransferase ThiI	Cytoplasmic	Protein synthesis	tRNA and rRNA base modification	x	x	x		25.9058	25.2719	25.2714	28.044	28.0845	28.0506	28.1887	28.4687	28.3694	-5569400	-6065669	-6082731	5171029	8872820	12887190	-844132	18112430	14179180	2	3	3	6	5	5	2	5	5
CDIF630erm_00873	CDIF630erm_00873	putative cell surface protein	Unknown	Protein fate	Protein and peptide secretion and trafficking					26.2547	26.7584	27.0743	26.4351	26.2191	27.076	26.3644	24.956	25.2982	-404100	-1717883	1100962	-5068373	-2294398	795454	1978910	-5101359	-2978243	8	6	7	7	6	7	4	3	3
CDIF630erm_00875	CDIF630erm_00875	putative diguanylate kinase signaling protein	CytoplasmicMembrane	Signal transduction	Other					NaN	24.3191	23.8387	NaN	NaN	NaN	NaN	NaN	NaN	-6161280	-6058824	-6234995	-6333366	-6577091	-6217473	-5713621	-5436136	-5605061	1	3	3	2	0	1	0	1	1
CDIF630erm_00876	PflA	formate C-acetyltransferase activating enzyme	Cytoplasmic	Protein fate	Protein modification and repair					28.383	28.208	27.922	26.5595	NaN	NaN	NaN	NaN	NaN	23963200	13229730	7857487	-4874764	-4681583	-5339616	-4180014	-5848637	-4321368	9	9	8	4	1	1	1	0	1
CDIF630erm_00877	PlfB	formate C-acetyltransferase	Cytoplasmic	Energy metabolism	Fermentation		x			35.046	35.0111	34.6983	34.5546	34.04	33.7235	34.7034	35.4359	34.0772	280964200	553235800	289733500	389901300	251638300	254975700	435288100	898469700	255959800	54	54	53	50	46	42	33	47	37
CDIF630erm_00879	CshA1	DEAD-box ATP-dependent RNA helicase CshA	Cytoplasmic	DNA metabolism	DNA replication, recombination, and repair	x	x			30.7466	30.3659	30.1849	31.8095	31.7539	31.4337	31.9575	31.3543	31.6407	12672200	20928550	11155510	80267500	73005140	63948260	51175650	65543410	69734560	24	26	25	32	30	22	14	17	20
CDIF630erm_00882	SrlA	PTS system, sorbitol-specific IIC component	CytoplasmicMembrane	Signal transduction	PTS					25.4219	NaN	25.8587	NaN	25.0483	NaN	NaN	NaN	NaN	-4424200	-4421566	-3296577	-355922	-4695501	-4970897	6458479	-5848637	-5912021	2	3	2	3	2	2	2	0	0
CDIF630erm_00887	CDIF630erm_00887	putative molybdopterin oxidoreductase	Cytoplasmic	Energy metabolism	Anaerobic					NaN	NaN	NaN	25.017	25.3168	NaN	NaN	NaN	NaN	-6663826	-6601959	-6620127	-5934040	-6009991	-6441449	-5615451	-5848637	-5912021	1	1	2	2	3	1	1	0	0
CDIF630erm_00888	SpoIIAA	anti-sigma F factor antagonist (stage II sporulation protein AA)	Unknown	Cellular processes	Sporulation and germination					NaN	NaN	NaN	24.8143	NaN	25.4521	NaN	NaN	NaN	-3886300	-3866898	-4841816	-5831344	-6577091	-3945490	-4637277	-5848637	-5912021	3	3	1	2	0	2	1	0	0
CDIF630erm_00889	SpoIIAB	anti-sigma F factor (stage II sporulation protein AB)	Cytoplasmic	Cellular processes	Sporulation and germination					26.3231	26.127	26.7354	26.6938	26.2279	27.3009	NaN	26.8963	NaN	-3672200	-5530625	-5194713	-3373720	-5218517	-136399	-3325185	-1153279	-4650264	6	5	6	6	5	5	1	2	1
CDIF630erm_00894	CDIF630erm_00894	transcriptional regulator, LacI family	Cytoplasmic	Regulatory functions	DNA interactions		x			25.4881	25.3541	NaN	24.9725	25.077	NaN	NaN	NaN	NaN	-5231700	-5621594	-6346686	-5725986	-4794916	-6456996	-5713621	-2574025	-5912021	5	4	1	3	4	0	0	1	0
CDIF630erm_00895	CDIF630erm_00895	putative membrane protein	CytoplasmicMembrane	Hypothetical proteins	Domain					NaN	27.8368	28.2549	26.8987	28.4137	27.0686	27.934	NaN	NaN	3097100	11306270	9033338	7036786	16959580	11174970	17719190	1726457	8323611	1	2	2	3	3	2	2	1	1
CDIF630erm_00897	CDIF630erm_00897	putative amidohydrolase, M20D peptidase family	Cytoplasmic	Protein fate	Degradation of proteins, peptides, and glycopeptides					26.0032	25.4301	25.1825	25.245	25.1785	NaN	NaN	NaN	NaN	-3785500	-5831670	-5806789	-3927370	-4467794	-6134500	-3566420	-3330296	-4594458	6	3	4	3	5	1	2	1	2
CDIF630erm_00898	CDIF630erm_00898	hypothetical protein	Cytoplasmic	Unknown function	Unknown function	x	x			25.2386	24.6921	24.3524	25.7712	26.8961	26.7684	26.9189	NaN	28.7496	-4345700	-5398509	-5375986	146996	7650935	-693778	8190718	2619598	4005777	4	4	4	5	5	5	2	2	2
CDIF630erm_00899	CDIF630erm_00899	putative penicillin-binding protein	CytoplasmicMembrane	Cell envelope	Biosynthesis and degradation of murein sacculus and peptidoglycan			x		34.4859	35.0513	35.7452	35.0021	34.5956	35.4139	33.9381	34.2674	34.3863	106364200	285188900	387205600	565702000	329719200	453729400	131280100	304475100	160313600	47	51	52	52	48	43	29	42	36
CDIF630erm_00902	CDIF630erm_00902	putative N-acetylmuramoyl-L-alanine amidase	Unknown	Cell envelope	Biosynthesis and degradation of murein sacculus and peptidoglycan					27.6085	27.8465	28.653	27.6521	27.668	27.8705	28.2931	27.5153	27.4755	-2663200	-2678680	5486333	4034544	2858013	4328051	1918512	161498	-2998135	5	5	6	9	7	5	4	3	2
CDIF630erm_00904	CDIF630erm_00904	ABC-type transport system, ATP-binding protein	Cytoplasmic	Transport and binding proteins	Amino acids, peptides and amines	x	x			31.029	30.4168	29.9354	32.2912	32.1334	32.11	31.2486	32.4103	32.6534	33814200	34875750	21795550	147210200	110275200	151614900	126672400	194565100	223236000	24	24	21	27	22	21	17	16	16
CDIF630erm_00905	CDIF630erm_00905	putative membrane protein	CytoplasmicMembrane	Hypothetical proteins	Domain					NaN	24.1063	24.5478	NaN	NaN	NaN	NaN	NaN	NaN	-6690370	-5709241	-5128680	-6037814	-6203746	-6008677	-5713621	-5848637	-5912021	1	2	2	1	1	1	0	0	0
CDIF630erm_00907	CDIF630erm_00907	putative GTP-binding protein, HflX type	Cytoplasmic	Unknown function	Unknown function	x	x	x		26.6524	26.3868	26.4982	27.6269	27.1132	27.2924	28.1377	27.7997	28.054	-4548500	-3182697	-3657410	3341427	569843	4457263	-1285451	1894166	4884376	9	8	7	10	10	9	4	5	7
CDIF630erm_00909	CDIF630erm_00909	putative hydrolase, NUDIX family	Unknown	DNA metabolism	DNA replication, recombination, and repair					27.2528	28.1225	28.6684	26.0327	26.4095	NaN	NaN	26.7948	NaN	1214100	2722489	2359969	-3918374	-3478286	-5037299	-2630173	-498589	-5708995	5	4	4	3	1	1	1	2	1
CDIF630erm_00910	CDIF630erm_00910	IMPACT family member protein	Cytoplasmic	Unknown function	Unknown function					26.964	27.1235	26.3465	26.3895	25.0546	27.1479	26.7632	NaN	26.5451	2591200	2049936	-2090076	-3494916	-5297860	-3893729	2960627	-5848637	4955025	13	12	8	6	2	6	3	0	5
CDIF630erm_00913	NadE	NAD+ synthase	Cytoplasmic	Biosynthesis of cofactors, prosthetic groups, and carriers	Pyridine nucleotides	x	x			27.8811	27.8794	27.3503	29.2392	29.5083	29.3111	29.2653	28.6754	29.6131	7645200	877530	701718	17142410	54700520	34304120	62588790	12824520	74678460	8	6	6	5	8	6	7	6	8
CDIF630erm_00914	CDIF630erm_00914	transcriptional regulatory protein	Cytoplasmic	Regulatory functions	DNA interactions	x		x		26.1611	26.521	27.0137	26.9412	25.6223	26.4012	28.0734	28.0889	27.6816	2190800	6395237	8634579	-3478128	-2018025	1486924	20796800	44682740	13715460	7	8	9	3	4	2	5	5	5
CDIF630erm_00915	CDIF630erm_00915	transcriptional regulator, LacI family	Cytoplasmic	Regulatory functions	DNA interactions	x	x	x		24.6478	NaN	24.7969	26.374	26.6521	26.335	27.222	27.1168	27.2249	-5647900	-6008653	-6165406	2759626	2414498	1946295	6607452	2400890	-946813	4	1	2	5	5	4	5	3	4
CDIF630erm_00926	CDIF630erm_00926	uncharacterized protein	Cytoplasmic	Unknown function	Unknown function	x	x	x		30.9003	30.8426	30.7996	28.0698	28.3721	28.375	29.8324	29.3278	29.0426	91899200	64675440	36414430	11469500	8248942	13081120	12881620	23815520	2147794	9	9	8	7	4	5	1	1	2
CDIF630erm_00928	FloX	putative flavodoxin	Cytoplasmic	Energy metabolism	Electron transport					25.2495	25.0617	NaN	25.3272	NaN	NaN	NaN	NaN	NaN	-5408000	-5814325	-6361994	-5724022	-6577091	-6456996	-4872635	-5301959	-5912021	3	3	2	3	0	0	1	1	0
CDIF630erm_00929	CDIF630erm_00929	putative signaling protein	CytoplasmicMembrane	Signal transduction	Other					25.7477	26.1471	26.223	26.2576	26.276	26.1634	NaN	NaN	26.0207	-6397950	-5948056	-4350822	-5686643	-5868140	-4931539	-5713621	-5848637	-5670822	6	4	7	6	3	3	0	0	2
CDIF630erm_00930	CDIF630erm_00930	putative universal stress protein A (UspA)	Cytoplasmic	Cellular processes	Adaptations to atypical conditions	x	x			33.2427	33.3213	33.4126	32.465	32.5373	32.4899	32.7043	32.4981	32.7045	280264200	220856000	210623700	163498700	163024000	219897600	103898100	222009900	147198500	15	15	13	15	14	13	8	8	7
CDIF630erm_00931	CDIF630erm_00931	PTS system, fructose-type IIB component	Cytoplasmic	Signal transduction	PTS		x			NaN	24.9582	25.5534	27.2276	25.669	NaN	NaN	NaN	NaN	-6549270	-6585380	-6575059	-3277042	-4381634	-5047345	-5713621	-4745566	-5912021	1	2	2	3	2	1	0	1	0
CDIF630erm_00932	CDIF630erm_00932	transcriptional regulator, GntR family	Cytoplasmic	Regulatory functions	DNA interactions					23.8986	23.2828	22.4474	23.5147	NaN	NaN	NaN	NaN	NaN	-5949150	-6096724	-6337397	-6386951	-6460671	-6456996	-3953125	-5360369	-1282999	3	2	3	2	1	0	2	1	2
CDIF630erm_00934	BglF1	PTS system, beta-glucoside-specific IIABC component,	CytoplasmicMembrane	Signal transduction	PTS		x			27.7193	27.9514	28.4617	27.4231	25.9047	27.0118	NaN	26.0227	NaN	-5300500	-2754334	3101563	-4050340	-6074904	-5387576	-5713621	-5289308	-5290251	7	10	10	7	3	6	0	2	1
CDIF630erm_00937	CDIF630erm_00937	transcription antiterminator, PTS operon regulator	Cytoplasmic	Signal transduction	PTS	x	x	x		24.5473	24.5017	23.6718	25.5982	25.5993	25.8363	25.0644	NaN	24.7548	-5546900	-6289612	-6089817	-6245735	-1869281	-2417765	-2108065	-4791535	-3812183	2	2	4	4	5	4	2	1	2
CDIF630erm_00938	CDIF630erm_00938	two-component response regulator	Cytoplasmic	Signal transduction	Two-component systems					25.6596	25.8484	25.3147	25.1329	26.0121	27.4605	26.4116	NaN	27.3705	-3714800	-5639861	-4125357	-2349035	605694	2148121	3182931	-2715680	14415930	3	2	5	3	4	2	3	1	5
CDIF630erm_00939	CDIF630erm_00939	two-component sensor histidine kinase	Cytoplasmic	Signal transduction	Two-component systems		x			27.2429	27.5214	27.8272	27.961	27.8588	28.411	28.9067	28.3826	27.5934	3427200	2462450	6843084	-690747	5828826	7882585	34450300	18864340	6128994	12	12	11	8	9	8	7	5	6
CDIF630erm_00940	CDIF630erm_00940	ABC-type transport system, multidrug-family ATP-binding protein	CytoplasmicMembrane	Cellular processes	Toxin production and resistance					25.3659	NaN	24.9722	NaN	NaN	NaN	NaN	NaN	NaN	-5827380	-5926882	-3085970	-5676127	-5127529	-6456996	-4452331	-5848637	-5279756	2	2	4	2	2	1	1	0	1
CDIF630erm_00943	CDIF630erm_00943	ABC-type transport system, multidrug-family permease	CytoplasmicMembrane	Cellular processes	Toxin production and resistance		x			NaN	25.7243	25.8943	23.9639	NaN	25.6765	NaN	NaN	NaN	-6070080	-5500548	1289157	-3269123	-5228459	-1557539	-5531305	-5848637	-4476905	2	2	2	3	2	2	1	0	2
CDIF630erm_00944	Rbr1	putative rubrerythrin	Cytoplasmic	Cellular processes	Adaptations to atypical conditions	x		x		33.4729	33.0147	34.2041	33.4684	33.9344	31.6908	31.3681	31.6252	30.9101	348774200	424380200	440036300	887809000	1042448000	341935900	72812460	63630930	31863890	16	17	15	16	17	9	8	7	4
CDIF630erm_00945	PerR	peroxide-responsive repressor	Cytoplasmic	Regulatory functions	DNA interactions	x	x			34.4322	34.4101	34.8332	31.3817	30.772	30.7195	32.0907	31.5426	30.2111	1073654000	840938600	759932900	119980200	105389200	107487600	160428000	145218400	49790600	12	11	9	9	7	8	4	4	5
CDIF630erm_00946	Dsr	desulfoferrodoxin	Unknown	Energy metabolism	Electron transport	x				30.3723	31.0408	31.7662	30.174	30.1687	30.7193	28.9734	NaN	NaN	47001200	45965810	48285270	46881780	39502730	44584030	11126290	6611764	1675876	4	4	4	4	4	4	2	1	1
CDIF630erm_00947	CDIF630erm_00947	oxidative stress glutamate dehydrogenase (glutamate synthase-like) (rubredoxin)	Cytoplasmic	Cellular processes	Adaptations to atypical conditions	x	x	x		33.5001	33.9105	33.7575	34.3061	34.7567	34.0345	32.684	32.752	33.2512	187234200	390385200	253008800	450645400	743223300	542291200	156189700	264836200	170971000	33	32	32	32	29	21	16	16	19
CDIF630erm_00948	CDIF630erm_00948	putative metallo-beta-lactamase superfamily protein	Cytoplasmic	Cell envelope	Biosynthesis and degradation of murein sacculus and peptidoglycan	x	x			27.8667	27.9179	26.8353	24.8767	25.3449	NaN	26.2922	NaN	NaN	8599200	3570300	-725158	-5799350	-3920823	-5035591	63630.9	-5848637	-5912021	7	7	7	4	5	1	3	0	0
CDIF630erm_00949	CDIF630erm_00949	na/leu symporter	CytoplasmicMembrane	Cell envelope	Other	x		x		28.0922	28.3431	28.6445	27.8956	27.9703	28.3992	NaN	27.1874	26.231	-1845100	1278238	10629830	5418401	5386050	7200986	-1133941	2365092	-4564575	4	4	4	3	3	3	1	2	2
CDIF630erm_00951	CDIF630erm_00951	citrate (Re)-synthase	Cytoplasmic	Central intermediary metabolism	Nitrogen metabolism					30.2557	30.2499	30.5706	30.0293	30.5208	29.7208	29.2599	30.1782	30.3907	48801200	54055930	50444400	27180490	34808860	27994890	21548590	57989950	47227710	12	11	10	10	9	9	7	8	8
CDIF630erm_00952	AcnB	aconitate hydratase	Cytoplasmic	Energy metabolism	TCA cycle		x			25.4138	24.8333	25.3608	25.4956	25.784	25.6615	26.3962	25.6938	25.4629	-5842890	-5860317	-5959237	-4342148	-5511933	-5045961	-4506844	-3001786	-4705980	4	4	3	6	6	3	2	3	2
CDIF630erm_00953	Icd	isocitrate dehydrogenase (NAD+)	Cytoplasmic	Energy metabolism	TCA cycle					26.0335	25.1443	25.1157	25.8473	25.2987	24.5968	25.0746	NaN	25.0522	-3998800	-4651386	-5358272	-2950010	-3205226	-5558767	-2617212	-3963783	-4709671	4	4	6	4	3	2	3	1	3
CDIF630erm_00955	CDIF630erm_00955	putative acetyltransferase	Cytoplasmic	Central intermediary metabolism	Other			x		29.0377	27.8164	28.253	28.8748	28.5919	28.2612	29.4565	29.4889	29.6514	6213200	1669453	-716777	4507406	-863109	-2918581	40947350	109195200	10624200	10	6	7	9	7	7	7	7	4
CDIF630erm_00959	CDIF630erm_00959	putative isomerase/hydrolase	Cytoplasmic	Energy metabolism	Other					25.0029	25.2478	25.3549	NaN	NaN	NaN	27.1846	26.7231	26.3003	-3756100	-4342130	-3850049	-6619471	-6434786	-6456996	13350480	1763889	-3623973	5	3	6	1	1	0	4	3	2
CDIF630erm_00960	PurH'	phosphoribosylaminoimidazolecarboxamide formyltransferase	Unknown	Purines, pyrimidines, nucleosides, and nucleotides	Purine ribonucleotide biosynthesis	x	x	x		29.4807	29.5232	29.7843	29.0442	29.3048	29.0349	30.6121	30.6924	30.8592	11238200	17507590	10482970	7578150	14246010	11626660	36907770	77763620	74310180	15	14	12	14	13	9	8	11	12
CDIF630erm_00963	Cwp25	putative cell wall-binding protein	Cellwall	Cell envelope	Biosynthesis and degradation of murein sacculus and peptidoglycan					25.9599	25.0882	25.3825	NaN	NaN	NaN	NaN	NaN	NaN	-502200	-4519823	-4217105	3151140	5452578	11384250	3675695	1749014	-638619	2	2	3	1	1	1	1	1	1
CDIF630erm_00968	CDIF630erm_00968	putative AbgB-like amidohydrolase	Cytoplasmic	Protein fate	Degradation of proteins, peptides, and glycopeptides	x		x		25.7638	25.9046	26.0438	26.1094	26.1165	26.0291	25.1952	25.7037	25.5418	-5651000	-4677035	-4460666	-5093525	-4844528	-3189611	-5193450	-4475979	-4604089	5	5	6	5	8	5	3	2	3
CDIF630erm_00971	CDIF630erm_00971	transcriptional regulator, MarR family	Cytoplasmic	Regulatory functions	DNA interactions					23.042	22.7317	NaN	NaN	NaN	NaN	NaN	NaN	NaN	-6412870	-6568183	-6722046	-6270760	-6577091	-5888835	-5713621	-4866137	-5493466	2	2	0	1	0	1	0	1	1
CDIF630erm_00972	OppB	ABC-type transport system, oligopeptide-family permease	CytoplasmicMembrane	Transport and binding proteins	Amino acids, peptides and amines					27.162	27.8799	28.3555	26.9484	27.3001	27.5862	26.7349	NaN	26.854	2619900	8359154	12817650	1409070	2667301	4092442	1481988	-5520010	1156458	6	7	7	5	4	4	2	1	2
CDIF630erm_00973	OppC	ABC-type transport system, oligopeptide-family permease	CytoplasmicMembrane	Transport and binding proteins	Amino acids, peptides and amines					25.6766	26.4212	26.743	25.3122	26.2884	27.0742	NaN	NaN	NaN	-62400	1831999	5864181	-1571429	198399	832528	-3171787	-4534784	-5752596	2	2	2	2	2	2	1	1	1
CDIF630erm_00974	OppA	ABC-type transport system, oligopeptide-family extracellular solute-binding protein	Cellwall	Transport and binding proteins	Amino acids, peptides and amines	x		x		32.5054	32.6838	33.8635	33.7365	33.0525	34.0117	32.23	31.842	31.5979	107714200	263221800	421625300	484449700	291902100	801570500	126395200	123068000	97301060	39	41	41	34	30	31	21	25	24
CDIF630erm_00975	OppD	ABC-type transport system, ATP-binding component	CytoplasmicMembrane	Transport and binding proteins	Amino acids, peptides and amines					26.9188	26.3944	27.132	26.2454	26.9642	27.0312	26.828	27.2111	27.2314	1058200	-397457	1292561	-900702	2287356	1530799	2650556	2095548	-4431000	7	7	7	8	6	4	3	4	3
CDIF630erm_00985	CDIF630erm_00985	putative ADP-ribose binding protein	Cytoplasmic	Unknown function	Enzymes of unknown specificity					24.3939	24.3962	24.3752	NaN	NaN	NaN	NaN	NaN	NaN	-5138300	-6020305	-5912442	-6644682	-6577091	-6456996	844640	-5745317	-5912021	3	2	3	1	0	0	2	1	0
CDIF630erm_00986	CDIF630erm_00986	uncharacterized protein	Unknown	Unknown function	Enzymes of unknown specificity					23.6647	24.1241	24.9055	NaN	23.907	NaN	24.5619	NaN	NaN	-6212610	-5931542	-5236174	-6275879	-5808984	-6126546	-2018215	-5848637	-5912021	3	4	4	2	2	1	2	0	0
CDIF630erm_00989	ModA	ABC-type transport system, molybdenum-specific extracellular solute-binding protein	Unknown	Transport and binding proteins	Anions					27.1451	27.6245	27.5527	27.3731	27.1348	27.6867	27.339	NaN	27.559	7212200	9230905	10024400	-2931954	3118948	7554619	10225520	-5377796	8428833	10	10	11	9	7	9	4	1	5
CDIF630erm_00991	ModC	ABC-type transport system, molybdenum-specific ATP-binding protein	CytoplasmicMembrane	Transport and binding proteins	Anions					26.4055	26.0661	26.7907	26.6834	26.3818	26.9287	NaN	NaN	NaN	-4073100	-4624723	-2280429	-3256896	-3148134	623464	-5713621	-4304898	-5317551	5	4	6	5	2	5	0	1	1
CDIF630erm_00992	Maa1	maltose O-acetyltransferase	Cytoplasmic	Energy metabolism	Sugars					NaN	NaN	NaN	24.5551	23.6121	NaN	NaN	NaN	NaN	-6607480	-6758146	-6722046	-5112404	-6324151	-6246462	-5713621	-5127150	-5912021	1	0	0	2	2	1	0	1	0
CDIF630erm_00993	CDIF630erm_00993	ABC-type transport system, sugar-family extracellular solute-binding protein	Unknown	Transport and binding proteins	Carbohydrates, organic alcohols, and acids		x			36.1806	36.5664	37.0699	36.1264	35.8194	35.6811	35.2487	36.0705	35.9561	2636954000	3221992000	5602271000	2558047000	2711470000	2871857000	4374318000	4299289000	3292100000	26	26	26	24	22	22	19	18	18
CDIF630erm_00994	CDIF630erm_00994	ABC-type transport system, sugar-family ATP-binding protein	CytoplasmicMembrane	Transport and binding proteins	Carbohydrates, organic alcohols, and acids	x	x	x		33.3719	33.3043	33.5144	32.1821	32.3876	31.8644	33.1908	32.7833	33.3864	398644200	386059400	406205000	203444500	351325800	263158400	936563300	352009000	919809000	15	16	13	12	12	7	11	9	12
CDIF630erm_00996	CDIF630erm_00996	ABC-type transport system, sugar-family extracellular solute-binding protein	Unknown	Transport and binding proteins	Carbohydrates, organic alcohols, and acids					27.3948	28.1924	29.1372	28.8247	27.2933	27.4534	26.1548	27.8146	27.5055	4483200	9323363	23151330	2155468	-4014746	-273387	-2001982	1895310	-2622524	11	11	10	7	7	7	3	4	4
CDIF630erm_00997	CDIF630erm_00997	ABC-type transport system, sugar-family ATP-binding protein	CytoplasmicMembrane	Transport and binding proteins	Carbohydrates, organic alcohols, and acids					NaN	NaN	NaN	NaN	NaN	25.9603	26.5657	NaN	27.4044	-5309500	-6037945	247036	-6477819	-5793712	-4876420	402803	-5706380	43495360	1	1	2	1	2	2	2	1	3
CDIF630erm_00998	CDIF630erm_00998	ABC-type transport system, sugar-specific permease	CytoplasmicMembrane	Transport and binding proteins	Carbohydrates, organic alcohols, and acids					30.7031	31.0217	31.4765	31.1538	31.4096	31.9919	31.5443	30.7234	30.4214	21464200	71396840	155541600	96613090	150664700	172416100	93249420	43909570	128972700	6	5	6	6	6	6	3	4	3
CDIF630erm_00999	Nnr	bifunctional NAD(P)H-hydrate repair enzyme Nnr	Unknown	Unknown function	Unknown function					24.3986	NaN	NaN	NaN	25.7469	26.4654	NaN	NaN	NaN	-6509890	-6630550	-6659853	-5697097	-3834001	-3283293	-5511460	-5361208	-5453061	3	1	1	2	2	2	1	1	1
CDIF630erm_01000	CDIF630erm_01000	putative protease	CytoplasmicMembrane	Protein fate	Degradation of proteins, peptides, and glycopeptides	x	x			31.7524	30.8335	30.6337	29.9784	29.3532	29.548	27.8424	30.1353	29.3482	331254200	199739100	174531200	132596200	108183300	99504580	87024900	251922900	36808540	6	7	5	5	5	4	4	4	3
CDIF630erm_01001	CDIF630erm_01001	putative protein modulating protease activity	Cytoplasmic	Protein fate	Protein modification and repair	x		x		34.2408	33.965	33.983	33.9959	33.6567	34.2097	33.3254	33.4601	33.2273	459984200	383343500	494418100	442639100	407171700	580067600	406186400	610928500	226866100	30	32	29	27	27	26	23	19	18
CDIF630erm_01004	GlgA	glycogen synthase	Cytoplasmic	Energy metabolism	Biosynthesis and degradation of polysaccharides					NaN	22.8173	24.0429	NaN	NaN	NaN	NaN	NaN	NaN	-6727103	-6588111	-5951427	-6677498	-6460018	-6456996	-4146415	-5848637	-5159107	1	2	3	0	1	0	1	0	1
CDIF630erm_01007	CDIF630erm_01007	transcriptional regulator, GntR family	Unknown	Regulatory functions	DNA interactions	x		x		26.1716	26.9943	26.9131	26.2	26.3569	NaN	27.598	27.2911	27.6705	1705600	3429136	-381024	-5706030	-4632349	-6031626	18567980	-76419.3	19134350	8	6	7	2	2	1	2	2	5
CDIF630erm_01008	SpeA1	arginine decarboxylase	Cytoplasmic	Energy metabolism	Amino acids and amines					25.6378	NaN	NaN	27.311	26.9166	27.2976	NaN	NaN	25.7489	-6196720	-6469575	-6314089	2066033	-1796567	3171286	-1687761	-5141362	-5480541	3	1	2	7	6	7	2	2	2
CDIF630erm_01009	SpeH	S-adenosylmethionine decarboxylase proenzyme	Cytoplasmic	Central intermediary metabolism	Polyamine biosynthesis	x	x			24.2045	NaN	24.4301	26.2519	26.023	26.6514	26.0029	NaN	NaN	-4807800	-6628770	-5990285	-1385296	-3354254	4101217	-2401019	-4009192	-5912021	2	1	2	2	2	2	2	1	0
CDIF630erm_01010	SpeE	spermidine synthase	Cytoplasmic	Central intermediary metabolism	Polyamine biosynthesis		x			24.6695	23.9989	NaN	25.2501	25.9275	25.0467	NaN	25.2608	NaN	-5670400	-5531548	-6360623	-5685123	-1550681	-4934927	-2205213	-4412886	-4802201	2	3	1	2	4	2	1	2	1
CDIF630erm_01012	CspA	cold shock protein	Cytoplasmic	Cellular processes	Adaptations to atypical conditions		x		x	26.4349	27.1475	27.8556	25.2391	24.3445	NaN	NaN	NaN	NaN	-2556200	-793529	2428536	-5369367	-5889055	-5192965	-5713621	-5848637	-5912021	2	2	3	2	2	1	0	0	0
CDIF630erm_01013	CDIF630erm_01013	ferredoxin hydrogenase	Cytoplasmic	Unknown function	Unknown function	x	x			31.4502	31.1552	31.37	30.6501	30.925	30.1868	29.4648	29.8285	30.4891	59842200	82085700	61658270	36490240	39476120	22218740	8740415	14848150	24524700	18	18	18	15	13	11	8	6	12
CDIF630erm_01014	CDIF630erm_01014	ferredoxin hydrogenase	Cytoplasmic	Energy metabolism	Electron transport	x	x	x		30.7273	30.4158	30.4574	29.4399	29.2065	29.1768	29.5951	29.8618	30.3548	33093200	52253810	28416400	13505570	8305120	8054794	8174551	18257910	27953410	17	19	18	15	13	7	7	8	8
CDIF630erm_01017	CDIF630erm_01017	uncharacterized protein	CytoplasmicMembrane	Unknown function	Unknown function					26.6371	26.2931	NaN	NaN	NaN	25.2839	NaN	NaN	NaN	-1761100	-3772055	-5736756	-6508970	-6577091	-4530856	-5713621	-5848637	-5912021	3	3	1	1	0	2	0	0	0
CDIF630erm_01018	CDIF630erm_01018	hypothetical protein	Cytoplasmic	Unknown function	Unknown function		x			29.4456	29.3682	29.3271	29.1606	29.2211	28.8761	29.7492	28.928	29.4145	7939200	12471900	8133700	15653900	10082140	11043780	130380	26515870	30709460	19	19	22	22	19	14	6	12	11
CDIF630erm_01020	OpuCA	ABC-type transport system, glycine betaine/carnitine/choline ATP-binding protein	CytoplasmicMembrane	Transport and binding proteins	Amino acids, peptides and amines					31.7679	31.8801	32.5234	32.0068	31.9732	32.3863	32.1636	31.7683	31.9878	106204200	105563500	171127200	112535300	126729600	167888200	170451800	173217300	121735000	25	23	22	20	18	17	16	17	16
CDIF630erm_01021	OpuCC	ABC-type transport system, glycine betaine/carnitine/choline permease	CytoplasmicMembrane	Transport and binding proteins	Amino acids, peptides and amines	x		x		33.0982	33.544	33.9346	33.0533	33.187	32.9339	32.2831	32.7583	32.9115	113484200	298818300	408339800	202778500	141313900	157665300	75769980	175538400	170632800	27	28	27	27	25	21	14	19	16
CDIF630erm_01026	CDIF630erm_01026	putative phage protein	Unknown	Unknown function	Unknown function	x		x		31.8518	31.7751	31.9727	31.8562	31.192	31.5636	30.693	30.7836	30.4978	37338200	70913910	84898100	53831980	32272690	38924150	27663390	64477650	6922664	39	41	43	35	29	23	17	15	14
CDIF630erm_01027	CDIF630erm_01027	putative phage DNA-binding protein	Cytoplasmic	DNA metabolism	DNA replication, recombination, and repair					NaN	21.9629	22.5232	NaN	NaN	NaN	NaN	NaN	NaN	-6321070	-6565996	-6470263	-6677498	-6577091	-6456996	-5713621	-5848637	-5912021	1	2	2	0	0	0	0	0	0
CDIF630erm_01121	RpsA	30S ribosomal protein S1	Cytoplasmic	Protein synthesis	Ribosomal proteins: synthesis and modification	x	x	x		31.4302	31.2215	30.889	29.478	28.9759	30.0443	31.6046	32.0736	32.2799	81222200	150067400	86172190	19071440	11247840	49147030	107451500	214474400	190865400	22	25	21	14	11	12	10	17	16
CDIF630erm_01123	CDIF630erm_01123	hypothetical protein	Unknown	Unknown function	Unknown function		x			28.892	28.9841	28.8096	28.2119	27.5106	27.5158	NaN	NaN	NaN	14738200	21040000	21906430	21768270	11224930	526720	-3260881	-5343081	-2667079	4	4	4	6	5	2	1	1	1
CDIF630erm_01130	CDIF630erm_01130	putative serine-pyruvate aminotransferase	Cytoplasmic	Amino acid biosynthesis	Pyruvate family					28.6948	27.479	28.729	27.5504	26.5942	28.0838	27.6614	27.6699	27.6481	25165200	14175780	12355680	1560347	-523868	6689842	2116565	2027876	1803645	12	12	11	7	5	5	4	3	6
CDIF630erm_01131	Hpr	hydroxypyruvate reductase	Cytoplasmic	Amino acid biosynthesis	Serine family	x	x	x		29.4481	29.2829	28.6862	27.4352	27.2564	28.0622	30.4017	30.3653	29.7502	36308200	30005990	14536200	2195428	1842141	4079279	154457500	65813110	27358910	13	15	13	7	8	5	11	10	9
CDIF630erm_01132	CDIF630erm_01132	uncharacterized protein, UCP033563-like	Cytoplasmic	Unknown function	Unknown function	x	x	x		27.1429	27.8142	27.2585	26.87	26.862	26.9888	27.2698	28.7738	28.7823	-310500	8251010	2255903	674565	-3072389	-1514528	-157048	16201590	8878278	9	9	7	7	4	4	3	6	4
CDIF630erm_01134	CDIF630erm_01134	putative radical SAM protein	Cytoplasmic	Unknown function	Enzymes of unknown specificity					28.1165	27.573	27.6686	28.3756	28.4297	27.8788	28.4147	27.997	28.0216	-2383700	-1064128	-2793392	5474060	407517	-822223	-2012175	491359	-437447	14	15	12	15	11	8	3	5	7
CDIF630erm_01135	CDIF630erm_01135	ABC-type transport system, nitrate/sulfonate/taurine extracellular solute-binding protein	Unknown	Transport and binding proteins	Anions			x		31.3808	31.8225	32.4045	32.7492	32.0599	32.1255	30.6896	31.5507	31.2724	59613200	88260600	118525100	76338090	88269460	108922300	62308170	69008740	34795050	23	28	25	17	19	16	11	15	13
CDIF630erm_01137	CDIF630erm_01137	ABC-type transport system, nitrate/sulfonate/taurine ATP-binding protein	CytoplasmicMembrane	Transport and binding proteins	Anions					23.64	24.4392	24.657	24.7138	NaN	24.826	24.9203	NaN	NaN	-4754400	-5115824	-5302397	-6384607	-5688881	-4116946	-3231309	-5848637	-3647015	5	4	2	3	2	3	2	0	1
CDIF630erm_01139	FumA	fumarate hydratase class i, subunit A	Cytoplasmic	Energy metabolism	TCA cycle					24.7063	24.3472	23.8434	NaN	NaN	NaN	NaN	NaN	NaN	-4294700	-5914557	-5805964	-6677498	-6276091	-6456996	-5713621	-5848637	-5912021	4	4	3	0	1	0	1	0	0
CDIF630erm_01140	FumB	fumarate hydratase class i, subunit B	Cytoplasmic	Energy metabolism	TCA cycle					26.316	26.8373	27.1567	25.8	26.2481	NaN	26.5668	25.8617	27.1455	-2702500	-2616682	-3910495	-5814302	-5786469	-6456996	3906199	12500870	10746710	4	3	4	3	3	0	2	3	4
CDIF630erm_01142	CDIF630erm_01142	putative acyl-CoA N-acyltransferase	Cytoplasmic	Unknown function	Unknown function					24.9718	24.6791	23.9512	23.5826	NaN	NaN	NaN	NaN	NaN	-5343200	-6154710	-6148599	-6361584	-5969752	-6266913	-5336102	-5848637	-5667617	3	2	3	2	1	1	1	0	1
CDIF630erm_01144	CDIF630erm_01144	S1 RNA binding domain protein	Unknown	Unknown function	Unknown function					26.0762	25.6886	24.7726	NaN	NaN	24.6837	26.547	24.7846	26.1339	-1610700	-2980094	-5360367	-6677498	-6577091	-5859993	6804927	-3926576	2909972	10	10	7	0	0	3	6	3	6
CDIF630erm_01145	CDIF630erm_01145	transcriptional regulator, GntR family	Cytoplasmic	Regulatory functions	DNA interactions					25.3705	24.9549	NaN	NaN	24.8009	NaN	NaN	NaN	NaN	-4266300	-5033805	-5559038	-6662313	-4248987	-6368640	-1368128	46263380	-4080052	5	4	1	1	4	1	1	1	2
CDIF630erm_01146	NagA1	N-acetylglucosamine-6-phosphate deacetylase	Cytoplasmic	Central intermediary metabolism	Amino sugars					27.9912	26.9021	27.4623	26.4511	27.4431	29.0581	NaN	NaN	NaN	-3259100	-5127725	-5326081	-5135718	-4989390	10733800	-5713621	-4572295	-5912021	8	6	5	6	4	3	0	2	0
CDIF630erm_01149	CDIF630erm_01149	two-component response regulator	Cytoplasmic	Signal transduction	Two-component systems					23.7402	24.0387	23.3996	NaN	NaN	NaN	NaN	NaN	NaN	-5502600	-5699923	-6179514	-6589797	-6577091	-5883915	-3202240	-5070232	-4087523	2	2	2	1	0	1	1	1	1
CDIF630erm_01151	CDIF630erm_01151	two-component sensor histidine kinase	CytoplasmicMembrane	Signal transduction	Other					23.996	24.7217	24.9977	24.9428	NaN	24.5267	NaN	NaN	NaN	-6731365	-6325317	-5825329	-6250157	-6577091	-6197729	-5713621	1638025	-5912021	2	3	4	3	0	2	0	1	0
CDIF630erm_01153	CDIF630erm_01153	ABC-type transport system, multidrug-family ATP-binding protein/permease	CytoplasmicMembrane	Cellular processes	Toxin production and resistance					27.5417	26.7253	27.1109	27.4197	27.0106	27.655	NaN	NaN	26.8509	-3982600	-5496766	-2959364	-2355750	-2798383	-3610032	-5713621	-4973776	-4626772	8	7	9	9	5	5	0	1	2
CDIF630erm_01154	CDIF630erm_01154	ABC-type transport system, multidrug-family ATP-binding protein/permease	CytoplasmicMembrane	Cellular processes	Toxin production and resistance		x			28.2724	28.243	28.4917	28.6426	28.5365	28.7877	28.9948	27.1977	29.1333	-4204200	-1050843	4089219	818231	-1855837	3219548	-1044469	-2930958	2637148	14	14	17	12	7	13	5	6	6
CDIF630erm_01158	CDIF630erm_01158	putative membrane protein	CytoplasmicMembrane	Hypothetical proteins	Domain					NaN	NaN	24.7995	24.9999	NaN	25.8078	NaN	NaN	NaN	-6709196	-6586791	-5431289	-3531535	-4637840	-3079431	-5713621	-5848637	-5538579	1	1	2	2	1	3	0	0	1
CDIF630erm_01160	PotA	ABC-type transport system, spermidine/putrescine ATP-binding protein	CytoplasmicMembrane	Transport and binding proteins	Amino acids, peptides and amines	x		x		30.9661	30.9038	31.5872	31.1865	31.0578	31.7196	30.1266	30.0024	30.4672	41814200	51637150	70601160	58455940	73249070	114404500	26095140	48043460	43479570	19	22	20	19	15	13	9	11	8
CDIF630erm_01161	PotB	ABC-type transport system, spermidine/putrescine permease	CytoplasmicMembrane	Transport and binding proteins	Amino acids, peptides and amines				x	27.3552	28.1635	27.8442	28.0655	27.8781	28.7566	NaN	NaN	NaN	-1822500	4692185	8354962	8957725	5161336	6692475	-5713621	-5848637	-5912021	3	3	3	4	4	3	0	0	0
CDIF630erm_01163	PotD	ABC-type transport system, spermidine/putrescine solute-binding protein	Unknown	Transport and binding proteins	Amino acids, peptides and amines	x		x		30.2636	30.6997	31.3156	30.5761	30.613	30.5147	29.4024	30.0775	29.6164	40340200	42438360	139051400	42420040	60279940	64347530	22777320	24878010	9322463	16	18	16	14	14	13	8	4	6
CDIF630erm_01175	Cwp16	putative cell wall hydrolase/autolysin	CytoplasmicMembrane	Cell envelope	Biosynthesis and degradation of murein sacculus and peptidoglycan	x	x	x		28.8167	28.9764	30.7494	27.5222	26.9935	26.3831	NaN	25.5621	25.5424	-1756600	6524844	24770680	-1080880	-3021640	-4802534	-4973646	-3760503	-4850266	9	11	14	5	4	3	1	2	2
CDIF630erm_01176	Cwp17	putative cell wall hydrolase/autolysin	Cellwall	Cell envelope	Biosynthesis and degradation of murein sacculus and peptidoglycan				x	23.6005	24.3745	25.426	23.3206	24.0458	NaN	NaN	NaN	NaN	-6577150	-5819953	-5768058	-6531290	-6393476	-6323528	-5713621	-5848637	-5912021	3	5	4	2	2	1	0	0	0
CDIF630erm_01177	CDIF630erm_01177	hypothetical protein	Cytoplasmic	Unknown function	Unknown function					24.9684	25.2208	25.4031	24.3418	25.6881	25.0176	NaN	25.4197	NaN	-5986990	-4867275	-5557070	-5919722	-5954290	-5508892	-4725830	-3976551	-4751615	5	6	5	4	3	3	1	4	2
CDIF630erm_01178	CDIF630erm_01178	putative helicase, superfamily 1, UvrD-family	Cytoplasmic	DNA metabolism	DNA replication, recombination, and repair					26.2298	26.6804	26.5051	26.8894	26.6161	NaN	25.7522	27.439	26.2034	-5598600	-5032421	-5131600	-4855377	-5781867	-5437511	-4474290	-1317067	-4250531	10	9	9	11	7	3	2	5	4
CDIF630erm_01180	AddB	ATP-dependent nuclease subunit B	CytoplasmicMembrane	DNA metabolism	DNA replication, recombination, and repair		x			27.455	27.2722	27.0428	28.9322	28.1554	28.2633	27.4012	27.9819	28.7818	-6172090	-6051138	-5931617	535180	-3152773	-4247807	-5282721	-740661	-3354124	16	11	15	27	17	12	5	7	9
CDIF630erm_01181	AddA	ATP-dependent nuclease subunit A	Cytoplasmic	DNA metabolism	DNA replication, recombination, and repair					29.1338	27.194	27.5914	28.6855	29.0786	28.6147	NaN	28.4707	29.7963	-5294600	-6487676	-6477990	-1083478	-5382409	-2843164	-2720904	2764750	2074514	8	9	8	14	5	3	1	2	4
CDIF630erm_01182	SbcD	nuclease SbcCD subunit D	Cytoplasmic	DNA metabolism	DNA replication, recombination, and repair					27.0172	26.7898	26.9643	26.456	26.5652	26.9361	26.8376	26.8933	27.443	-195700	1152511	-1767021	-4164757	-4670695	-1431156	-4516622	-2072873	497847	10	8	10	7	4	6	3	2	6
CDIF630erm_01183	SbcC	nuclease SbcCD subunit C	Cytoplasmic	DNA metabolism	DNA replication, recombination, and repair					33.0674	31.915	31.548	32.6338	32.1247	31.1487	30.7118	30.3673	32.6389	16655200	22488790	13859770	48817940	29886580	11494380	2130885	20631340	22480390	77	74	72	78	68	42	20	21	34
CDIF630erm_01184	CDIF630erm_01184	putative membrane protein	CytoplasmicMembrane	Cellular processes	Pathogenesis					31.3191	31.5652	31.4541	31.4358	31.2367	31.514	31.4251	31.308	32.0217	16300200	42979900	77744760	86732470	50280890	79012750	43583820	67057040	66340420	13	18	17	16	12	15	7	8	11
CDIF630erm_01187	Cwp18	putative cell wall-binding protein	Cellwall	Cell envelope	Other	x	x	x		33.7421	33.7921	33.996	33.2899	33.4253	33.6531	32.5671	31.5761	30.6273	636614200	494648600	495196200	169749600	537129200	624205800	460728900	114630200	79691500	28	29	25	21	24	22	22	19	18
CDIF630erm_01188	CDIF630erm_01188	putative phosphodiesterase	Cytoplasmic	Unknown function	Enzymes of unknown specificity	x	x			28.696	28.6182	28.6187	24.7926	25.2945	24.2862	26.003	NaN	25.2224	22985200	15691440	7412044	-3823723	-2533372	-5092095	-1625973	-3495948	2216188	10	9	8	3	3	2	2	1	3
CDIF630erm_01189	PpnK	NAD+ kinase	Cytoplasmic	Energy metabolism	Sugars					25.9086	25.3489	NaN	NaN	NaN	NaN	NaN	NaN	25.5162	-3143900	-4394165	-5398780	-5500003	-3079774	-6456996	5249377	-4108467	9058658	2	2	1	1	1	0	1	1	2
CDIF630erm_01190	CDIF630erm_01190	ABC-type transport system, multidrug-family ATP-binding protein	CytoplasmicMembrane	Cellular processes	Toxin production and resistance					27.3511	27.5667	28.464	27.9463	28.168	28.8695	28.8767	28.0688	27.647	6713200	4286854	8165795	1258744	11878380	8016403	29172750	7964716	1061834	15	13	12	12	10	7	7	5	3
CDIF630erm_01192	CDIF630erm_01192	hypothetical protein	Unknown	Unknown function	Unknown function					27.1817	26.8283	26.9892	27.4005	26.8629	25.7116	NaN	26.8197	NaN	-622600	-581885	-583377	1591269	-5047524	-661961	-4636233	-1624142	-5265859	5	6	7	8	5	3	1	2	1
CDIF630erm_01193	CDIF630erm_01193	YbaK/aminoacyl-tRNA synthetase-associated protein	Cytoplasmic	Regulatory functions	RNA interactions					27.8743	26.7767	26.0668	24.5164	NaN	NaN	NaN	25.6069	NaN	4573200	-17068.1	-2112045	-6493468	-6577091	-6456996	-5713621	0	-5707069	2	2	2	2	0	0	0	1	1
CDIF630erm_01194	Bcd	butyryl-CoA dehydrogenase, catalytic subunit	Cytoplasmic	Fatty acid and phospholipid metabolis	Degradation	x	x	x		31.5814	30.9188	31.0134	32.3639	32.6605	32.4347	33.0528	32.717	32.8046	67235200	35673200	25982030	213020700	227910300	178639700	294572500	418700400	349975100	16	16	16	16	15	14	15	14	15
CDIF630erm_01195	EtfB3	butyryl-CoA dehydrogenase, electron transfer flavoprotein beta subunit	Cytoplasmic	Energy metabolism	Electron transport	x		x		30.9071	30.6258	29.9362	29.9653	29.8248	30.2426	31.2545	30.9942	31.7133	68177200	39405390	21399710	21977110	38429420	32678550	211055500	74530400	211579000	17	15	14	16	13	15	15	14	17
CDIF630erm_01196	EtfA3	butyryl-CoA dehydrogenase, electron transfer flavoprotein alpha subunit	Cytoplasmic	Energy metabolism	Electron transport	x		x		31.9412	31.4354	31.0052	30.9516	31.1631	31.1398	32.2533	32.72	32.8906	100514200	63059900	38066360	77903190	108397700	91106900	210443500	376348100	239402500	20	18	18	15	15	13	14	12	11
CDIF630erm_01197	Crt2	short-chain-enoyl-CoA hydratase	Cytoplasmic	Fatty acid and phospholipid metabolis	Biosynthesis	x	x			26.5594	26.5539	25.8872	26.9242	27.5393	27.7144	28.1766	27.0161	28.2743	-3933600	-2277626	-4811149	-1597911	4775478	3384299	22365050	1598632	35982550	6	4	5	10	8	11	5	8	11
CDIF630erm_01198	Hbd	3-hydroxybutyryl-CoA dehydrogenase	Unknown	Fatty acid and phospholipid metabolis	Degradation					28.7808	28.8045	28.9356	28.4707	28.8986	28.5913	29.3036	28.6491	28.305	19289200	18360350	13796560	13965110	21182590	12939400	45975460	16039770	10982710	5	5	5	4	4	3	5	4	4
CDIF630erm_01199	ThlA1	acetyl-CoA C-acetyltransferase	Cytoplasmic	Fatty acid and phospholipid metabolism	Other	x	x	x		29.1949	29.112	29.449	28.5318	28.7954	28.9889	29.2957	30.2584	30.2748	20123200	24886100	24812010	230722	3529199	1422428	16496230	73634640	66932660	10	10	12	9	10	7	6	9	10
CDIF630erm_01207	CcpA	transcriptional regulator, LacI family	Cytoplasmic	Regulatory functions	DNA interactions					28.6655	27.8999	27.8583	28.5573	28.6925	28.4572	29.202	28.3449	29.0465	18847200	6042739	4224895	22194040	33328250	17333260	27326180	9461349	11892120	13	10	9	11	10	6	5	4	5
CDIF630erm_01213	CDIF630erm_01213	putative histidinol-phosphatase	Cytoplasmic	Amino acid biosynthesis	Histidine family	x	x			28.8574	28.2533	28.3016	26.4768	26.0333	NaN	26.025	24.8139	25.4345	13935200	5715832	23020520	-981732	-172224	-4151473	-992497	-4992881	-3908674	9	8	6	4	3	1	3	2	2
CDIF630erm_01214	CDIF630erm_01214	bifunctional transcriptional regulator/aminotransferase	Cytoplasmic	Regulatory functions	Other					23.5394	NaN	NaN	24.1122	24.0437	24.1458	NaN	NaN	NaN	-6578170	-5123020	-5379859	-5865555	-6158337	-5787287	-5713621	-5363374	-5500739	3	3	3	3	2	2	0	1	1
CDIF630erm_01216	ApeA	aminopeptidase ApeA	Cytoplasmic	Protein fate	Degradation of proteins, peptides, and glycopeptides	x	x			25.8451	25.6985	25.9615	27.9416	28.2157	26.9213	NaN	NaN	24.5542	-5899200	-5543449	-5564371	2428528	1257292	-2667584	-5713621	-5848637	-5592567	6	6	6	10	9	5	0	0	2
CDIF630erm_01218	CDIF630erm_01218	PTS system, mannose-type IIA component	Cytoplasmic	Signal transduction	PTS				x	24.6065	24.2292	24.699	NaN	NaN	NaN	NaN	NaN	NaN	-5528100	-6347985	-6102776	-6376472	-6577091	-6456996	-5713621	-5848637	-5912021	3	3	3	1	0	0	0	0	0
CDIF630erm_01219	CDIF630erm_01219	membrane complex biogenesis protein, btpa family	Cytoplasmic	Unknown function	Unknown function					NaN	23.3041	23.086	NaN	25.0536	NaN	NaN	NaN	NaN	-6582830	-6232448	-6388966	-6552032	-4174852	-5446820	-1521904	-5210186	-1600193	1	2	2	1	4	3	1	1	2
CDIF630erm_01220	CDIF630erm_01220	PTS system, mannose-type IIB component	Cytoplasmic	Signal transduction	PTS					26.9354	24.2697	NaN	24.6537	26.1932	NaN	NaN	NaN	NaN	-1235800	-6430051	-6474695	-5591486	-3763369	-6302971	-5713621	-5848637	-5841926	3	2	1	2	2	1	0	0	1
CDIF630erm_01222	CDIF630erm_01222	PTS system, mannose-type IID component	CytoplasmicMembrane	Signal transduction	PTS					27.5956	28.089	28.2418	27.9677	27.819	27.657	28.6417	27.2839	27.2747	6637200	9760065	8101118	10544710	13689400	15956680	5411399	-2492946	4567209	5	5	5	6	6	5	2	2	3
CDIF630erm_01223	CDIF630erm_01223	transcriptional regulator, LysR family	Cytoplasmic	Regulatory functions	DNA interactions	x	x	x		27.0985	26.8713	27.0718	26.4684	26.6792	26.6471	28.5481	27.9986	27.4434	3114800	-352803	-10793.9	-122273	820577	-3338088	34217030	11501320	2454288	8	7	7	7	5	5	6	6	4
CDIF630erm_01224	CDIF630erm_01224	putative lipoprotein	Unknown	Unknown function	Unknown function			x		29.5306	29.9974	30.5594	30.4022	29.7946	29.8633	29.5602	29.2854	28.8286	33444200	49130860	83074510	42195020	39933680	36056920	40173620	22194010	4607794	12	14	12	9	10	8	6	5	7
CDIF630erm_01225	MoeA	molybdopterin molybdotransferase	Cytoplasmic	Biosynthesis of cofactors, prosthetic	Molybdopterin					25.7327	24.7796	25.9366	26.0476	25.972	24.9844	NaN	25.8141	26.1566	-5622100	-5897765	-5639801	-3248533	-3290628	-4232016	-3984459	-4690605	-3054481	3	3	5	7	8	5	2	3	4
CDIF630erm_01226	MobB	molybdopterin-guanine dinucleotide biosynthesis adapter protein	Cytoplasmic	Biosynthesis of cofactors, prosthetic groups, and carriers	Molybdopterin					26.1914	26.2445	25.4321	25.5241	25.7442	25.0288	NaN	NaN	NaN	-2421000	-4254483	-5914347	-4050403	-4844150	-5901708	-5713621	-5328100	5806566	7	6	5	6	6	3	0	1	1
CDIF630erm_01227	CDIF630erm_01227	PTS system, galactiol-type IIB component	Cytoplasmic	Signal transduction	PTS				x	27.3836	26.8961	25.8093	25.8556	NaN	NaN	NaN	NaN	NaN	1099100	-1784403	-4756545	-5353022	-6501574	-6456996	-5713621	-5848637	-5912021	3	3	3	2	1	0	0	0	0
CDIF630erm_01228	YwjA	ABC-type transport system, multidrug-family ATP-binding/permease protein	CytoplasmicMembrane	Cellular processes	Toxin production and resistance	x	x			31.3465	31.5952	31.8466	30.3871	30.3242	30.2356	30.378	30.4455	29.9534	30293200	54562800	88443160	20505250	15280140	15431060	4837104	26082700	5039953	17	20	22	17	11	14	6	8	9
CDIF630erm_01229	CDIF630erm_01229	putative membrane protein	CytoplasmicMembrane	Transport and binding proteins	Amino acids, peptides and amines	x	x	x		30.9401	31.3465	31.422	30.2781	30.5419	30.5704	27.6373	27.8301	28.8311	24365200	59841180	96141150	56729090	70824520	73938610	-1708902	729355	13120200	7	7	7	8	6	7	2	3	4
CDIF630erm_01230	CDIF630erm_01230	putative peptidase, M20D family	Cytoplasmic	Protein fate	Degradation of proteins, peptides, and glycopeptides	x	x			26.1591	25.0155	25.6472	26.75	27.1664	26.7011	28.505	26.7709	26.8625	-4009700	-3317951	-549726	-358710	1011141	336083	5359663	3031025	-2038091	6	7	8	5	5	4	2	3	3
CDIF630erm_01239	CDIF630erm_01239	ABC-type transport system, multidrug-family permease Tn1549-like, CTn4	CytoplasmicMembrane	Cellular processes	Toxin production and resistance				x	24.7143	26.3176	25.0434	25.6592	26.0362	25.6563	NaN	NaN	NaN	-5642500	-3151421	-6118542	-3171621	-120623	5134473	-5713621	-5848637	-5912021	1	1	1	2	2	2	0	0	0
CDIF630erm_01240	CDIF630erm_01240	ABC-type transport system, multidrug-family ATP-binding protein Tn1549-like, CTn4	CytoplasmicMembrane	Cellular processes	Toxin production and resistance	x		x		29.0836	29.3233	29.5479	28.9031	29.0582	29.3461	28.1704	28.0107	27.9243	14200200	16195010	30510860	18914450	24976860	37412660	29933780	7150199	1221996	7	8	8	9	9	9	6	3	3
CDIF630erm_01241	CDIF630erm_01241	two-component sensor histidine kinase,Tn1549-like, CTn4	CytoplasmicMembrane	Signal transduction	Two-component systems					23.3784	NaN	24.8367	NaN	NaN	NaN	NaN	NaN	NaN	-5968860	-5938120	-5300366	-6635853	-6577091	-6456996	-4701669	-5848637	-5912021	2	2	2	1	0	0	1	0	0
CDIF630erm_01264	CDIF630erm_01264	choline trimethylamine-lyase	Cytoplasmic	Energy metabolism	Fermentation					25.4052	24.7924	24.5624	24.4174	24.5243	NaN	NaN	24.5935	NaN	-6524360	-6391800	-6579059	-6049718	-6362393	-6456996	-5427512	-5309788	-5657239	3	3	3	5	2	0	1	2	1
CDIF630erm_01266	CDIF630erm_01266	transcriptional regulator, RmlC-type	Cytoplasmic	Regulatory functions	DNA interactions		x			26.1463	26.0902	25.6565	24.6431	25.2525	24.8232	25.071	26.1444	26.5992	880100	-1490462	-2166839	-4413167	-5138133	-5437835	-1266576	-4284302	10860950	9	9	8	4	3	3	2	2	4
CDIF630erm_01267	CDIF630erm_01267	putative phosphoesterase	Cytoplasmic	Unknown function	Unknown function					28.6846	28.7283	29.7686	29.0223	29.1159	29.085	29.115	28.1132	26.9004	22883200	14818860	30882380	15548770	31063370	17361780	27239570	10341090	29236.5	11	11	12	9	8	6	7	4	3
CDIF630erm_01268	CDIF630erm_01268	uncharacterized protein	Cytoplasmic	Unknown function	Unknown function	x		x		26.8455	26.6532	26.4701	27.2262	27.212	26.5437	27.3593	27.8232	27.4777	1579900	6055122	-2770535	8189445	6891785	6732401	17764220	14439500	7662972	5	7	3	5	5	5	4	5	5
CDIF630erm_01270	CDIF630erm_01270	putative nitroreductase-like oxidoreductase	Cytoplasmic	Central intermediary metabolism	Nitrogen metabolism	x	x	x		30.7467	30.217	30.0677	27.9356	27.3632	27.896	28.4556	28.4843	NaN	27895200	15206860	11420050	-595590	999536	1806773	9101876	6725859	14691010	15	12	11	6	4	7	4	2	2
CDIF630erm_01275	PolA	DNA polymerase I (POLI)	Cytoplasmic	DNA metabolism	DNA replication, recombination, and repair					29.0861	29.1912	28.5235	28.5814	28.2372	28.734	28.5273	29.9913	29.7266	-2857200	683780	-3734174	1959473	-1438200	-2262512	-1478238	11328870	418255	32	30	25	26	23	12	9	16	10
CDIF630erm_01277	CDIF630erm_01277	putative lytic transglycosylase-like protein	Unknown	Cell envelope	Biosynthesis and degradation of surface polysaccharides and lipopolysaccharides					29.9512	29.2944	30.5992	30.49	29.1134	29.1225	29.1818	29.284	26.3983	20835200	10776280	25978140	46701000	24718880	31004710	2345336	4879096	-4856566	10	11	10	10	10	8	5	6	3
CDIF630erm_01278	CDIF630erm_01278	putative solute-binding lipoprotein	Cellwall	Transport and binding proteins	Amino acids, peptides and amines			x		32.159	32.2498	33.0017	32.5097	32.4533	32.7437	32.1433	31.7023	31.6244	111094200	109146300	174035200	77384660	115479100	177312500	81429780	74582700	57073420	31	35	33	29	29	27	16	17	18
CDIF630erm_01282	CDIF630erm_01282	putative SH3-domain protein	Cellwall	Cell envelope	Biosynthesis and degradation of murein sacculus and peptidoglycan	x	x	x		26.8566	26.1756	25.9928	25.5179	25.3441	25.1967	26.0401	25.9268	26.0884	-2797500	-3764951	-2675802	-4161019	-5186988	-4511766	-3086719	-3285329	-3726584	5	5	7	6	5	2	2	2	3
CDIF630erm_01284	RnfC	electron transport complex protein	Cytoplasmic	Energy metabolism	Electron transport					31.9062	32.287	32.9189	31.9728	31.7826	32.0407	31.7694	32.3228	32.7125	57346200	135298800	162442000	133809300	110977400	164479100	107662800	126760500	172286300	13	14	15	14	13	13	9	11	12
CDIF630erm_01285	RnfD	electron transport complex protein	CytoplasmicMembrane	Energy metabolism	Electron transport			x		31.7476	32.139	31.7513	31.7234	32.0138	31.7135	31.6588	30.9541	31.4836	156134200	196205900	223748700	135493300	226949300	250961100	177923600	50156980	152151400	7	6	6	4	4	4	4	3	4
CDIF630erm_01286	RnfG	electron transport complex protein	Unknown	Energy metabolism	Electron transport			x		30.7622	31.097	32.4705	31.6141	32.6201	31.4644	31.3577	29.8944	30.59	300914200	275150600	310298800	197907200	272542700	215268800	119882000	83780560	318867200	10	10	10	11	9	6	4	3	7
CDIF630erm_01287	RnfE	electron transport complex protein	CytoplasmicMembrane	Energy metabolism	Electron transport			x		30.3235	29.0503	28.5292	30.6353	30.4754	30.1142	29.6437	28.1921	27.7984	50851200	24043250	14559060	112606600	82555500	86416660	19690470	15328720	-4572406	3	3	3	2	2	2	2	2	1
CDIF630erm_01289	RnfB	electron transport complex protein	Cytoplasmic	Energy metabolism	Electron transport	x	x	x		32.806	32.8773	33.032	33.5213	33.6838	33.5406	32.9467	32.5677	31.9119	244074200	230159600	208600800	221464700	419996700	409744800	465336600	208835100	137345300	10	12	10	10	11	9	9	10	9
CDIF630erm_01290	CDIF630erm_01290	putative maf-like protein	Cytoplasmic	Cellular processes	Cell division					24.6245	25.0542	25.2162	NaN	NaN	NaN	NaN	NaN	26.4636	-3593400	-2296078	-5189760	-4697373	-3202102	-6372329	-4936549	-5384786	2619862	4	5	3	3	3	1	1	1	3
CDIF630erm_01292	MreB2	rod shape-determining protein MreB	Cytoplasmic	Cell envelope	Biosynthesis and degradation of murein sacculus and peptidoglycan	x	x	x		36.1715	34.8686	34.5354	36.924	36.8279	36.6785	36.3005	36.2731	36.1568	1741354000	942642900	448220500	3240033000	3250637000	3928806000	4482295000	5057413000	3533508000	37	35	34	39	38	37	35	35	34
CDIF630erm_01293	MreC	rod shape-determining protein MreC	Unknown	Cell envelope	Biosynthesis and degradation of murein sacculus and peptidoglycan	x		x		33.1044	33.1314	33.2557	33.6188	32.8405	32.4618	31.9897	32.0107	31.3086	193234200	240313500	382294100	326079300	282100400	205919000	289352700	119112300	80638500	20	22	22	21	21	14	12	11	12
CDIF630erm_01295	CDIF630erm_01295	putative penicillin-binding protein with a N-terminal TonB-box	CytoplasmicMembrane	Cell envelope	Biosynthesis and degradation of murein sacculus and peptidoglycan	x	x	x		32.4901	32.5421	33.0293	31.2231	31.0043	31.4401	32.648	33.0858	32.6521	26913200	59426770	66691380	20972870	12517040	27023060	30347210	168150100	51393720	56	58	58	44	34	40	25	35	31
CDIF630erm_01296	MinC	cell division regulator (septum placement)	Cytoplasmic	Cellular processes	Cell division	x				24.7121	25.0476	24.6116	24.9343	25.2516	25.002	NaN	NaN	26.6081	-3544800	-5459493	-2839488	-5904454	-3561226	-3628385	-5518582	-5495291	6626541	5	3	4	2	3	2	2	1	4
CDIF630erm_01297	MinD	septum site-determining protein MinD (cell division inhibitor MinD)	CytoplasmicMembrane	Cellular processes	Cell division	x		x		33.5789	33.4149	32.647	33.3193	33.2358	33.5747	34.2524	34.1336	34.9781	542634200	394793500	251559700	395971500	700741900	634713900	2411345000	607659300	2413727000	22	21	17	17	18	16	16	17	21
CDIF630erm_01298	MinE	cell division topological specificity factor	Cytoplasmic	Cellular processes	Cell division					28.2704	28.3306	27.8392	28.178	26.5294	27.9322	NaN	NaN	NaN	5482200	2562338	-779128	4201521	1779088	7041062	-5713621	4822212	-3042510	3	2	2	2	2	2	0	1	1
CDIF630erm_01299	MrdB	rod shape-determining protein MrdB	CytoplasmicMembrane	Cellular processes	Cell division	x		x		29.773	29.9321	30.0901	29.5135	29.6224	29.8455	29.4381	28.6977	29.0293	64748200	83852310	99321490	49336470	72310300	41745320	58310160	11201370	25887310	6	6	6	3	5	3	3	3	2
CDIF630erm_01300	MgsA	methylglyoxal synthase	Cytoplasmic	Energy metabolism	Other					NaN	NaN	NaN	27.2129	27.3851	27.1345	NaN	NaN	NaN	-3976400	-5515679	-6145031	-1201253	-2045482	846349	-4918101	-5848637	-3405699	2	2	1	3	2	3	1	0	1
CDIF630erm_01302	CDIF630erm_01302	hypothetical protein	Cytoplasmic	Unknown function	Unknown function					27.5496	28.5919	28.4144	27.6387	28.0044	28.5413	28.0355	NaN	26.9785	12256200	19355110	18034090	6200478	7472051	13029340	44949980	-5848637	5296994	8	8	8	8	7	6	6	0	4
CDIF630erm_01303	CDIF630erm_01303	uncharacterized protein, transglutaminase-like	Unknown	Unknown function	Unknown function					24.5371	24.8708	25.1676	25.8513	25.8226	24.5034	25.4717	NaN	NaN	-6179130	-6117713	-5360938	-5241646	-5303351	-6055989	-5338418	-5166059	-5912021	2	2	2	3	4	3	2	1	0
CDIF630erm_01304	FprA	flavo-diiron protein FprA	Cytoplasmic	Energy metabolism	Anaerobic	x	x			29.6503	29.8521	30.4474	28.9074	29.2219	28.9718	28.8691	29.4599	29.5525	19470200	32744250	28119280	24874220	21468650	5705068	4562833	10838170	9771157	12	12	13	10	11	4	3	4	4
CDIF630erm_01305	CDIF630erm_01305	putative radical SAM-superfamily protein	Cytoplasmic	Unknown function	Enzymes of unknown specificity		x			26.5298	27.098	27.9636	28.0358	27.9714	28.2584	28.4365	27.9365	28.1738	-5728100	-2536508	-463565	5058760	2225338	5271802	-791154	3059958	1137368	9	8	13	13	10	9	5	8	7
CDIF630erm_01306	CDIF630erm_01306	radical SAM-linked protein	Cytoplasmic	Unknown function	Unknown function	x				NaN	24.2536	24.2028	23.8719	NaN	NaN	25.9956	26.3058	NaN	-5351900	-4793744	-5085568	-6537657	-6577091	-4260474	11560500	3432481	-1598663	1	2	2	2	0	1	2	2	1
CDIF630erm_01308	RplU	50S ribosomal protein L21	Unknown	Protein synthesis	Ribosomal proteins: synthesis and modification					32.4478	32.9954	32.721	32.7561	32.4875	32.6237	33.3165	32.371	32.0134	714184200	543816700	368789800	653043300	624612500	691619800	441708900	517119200	198757000	3	3	3	3	3	3	3	3	3
CDIF630erm_01310	RpmA	50S ribosomal protein L27	Cytoplasmic	Protein synthesis	Ribosomal proteins: synthesis and modification					27.8387	28.2414	28.8543	27.855	26.6413	28.1644	NaN	27.3787	NaN	11812200	8920509	12447100	5311365	-2746782	7271625	-5713621	5829612	-2871761	5	4	4	4	3	2	0	2	1
CDIF630erm_01311	ObgE	Spo0B-associated GTP-binding protein	Cytoplasmic	Protein synthesis	Other	x		x		26.6622	26.4693	27.1601	26.5398	26.3377	26.6454	26.9207	27.2919	27.7294	-3975500	-1164415	506715	-2836986	-3609608	-2139959	-2384157	2369833	1793423	10	12	12	9	7	6	5	8	7
CDIF630erm_01312	CDIF630erm_01312	rna-binding protein, yhby family	Cytoplasmic	Protein synthesis	Ribosomal proteins: synthesis and modification				x	25.0951	25.0567	25.5255	NaN	NaN	NaN	NaN	NaN	NaN	-4885900	-5792183	-5436432	-6437317	-6577091	-6099619	-5713621	-5848637	-5912021	4	4	5	1	0	1	0	0	0
CDIF630erm_01314	Hom1	homoserine dehydrogenase	Cytoplasmic	Amino acid biosynthesis	Aspartate family	x		x		25.9224	25.4908	25.9368	25.9004	26.3812	26.1024	26.5147	26.5307	26.9056	-5604300	-6150161	-6240455	-4612542	-4512388	-4209627	242744	-864376	5287224	4	4	2	5	5	4	4	3	4
CDIF630erm_01317	CDIF630erm_01317	transcriptional regulator, GntR family	Cytoplasmic	Regulatory functions	DNA interactions					NaN	23.2634	24.327	23.2155	24.207	NaN	NaN	NaN	NaN	-6278840	-6528557	-6400757	-6331326	-5706009	-6205804	-5713621	-5285441	-4577986	2	3	2	2	2	1	0	1	2
CDIF630erm_01321	CDIF630erm_01321	lactate dehydrogenase (electron bifurcating), catalytic subunit	Unknown	Energy metabolism	Electron transport				x	23.7301	24.1551	23.8457	NaN	NaN	NaN	NaN	NaN	NaN	-6354620	-6165403	-5995682	-5663583	-5986690	-4354215	-5713621	-5848637	-5912021	3	3	3	6	2	4	0	0	0
CDIF630erm_01323	AckA	acetate kinase	Cytoplasmic	Energy metabolism	Fermentation					30.4171	29.9967	30.2269	29.7114	29.602	30.0263	29.9319	31.1775	30.9741	69164200	66693020	54631360	17026340	13724880	12042370	20585460	70123540	49962710	17	18	16	11	14	10	11	12	10
CDIF630erm_01327	PlsX	phosphate acyltransferase	Cytoplasmic	Fatty acid and phospholipid metabolism	Biosynthesis	x	x			28.8463	28.6786	28.7652	28.6079	28.1129	28.382	26.5825	28.4797	27.8402	8111200	7494007	8995407	7960150	8503224	7176636	-2174005	3013372	-3641885	21	18	17	15	14	11	5	5	3
CDIF630erm_01328	FabH	beta-ketoacyl-[acyl-carrier-protein] synthase 3	Cytoplasmic	Fatty acid and phospholipid metabolism	Biosynthesis	x	x	x		29.4827	28.803	29.1761	28.474	27.7235	28.4682	30.3082	30.1017	30.2098	44732200	31278950	36248600	3253895	1403283	7952785	147378400	57470150	37177560	14	14	12	10	7	8	10	7	7
CDIF630erm_01329	FabK	enoyl-[acyl-carrier-protein] reductase (NADH)	Cytoplasmic	Fatty acid and phospholipid metabolis	Biosynthesis	x		x		32.7696	32.6769	32.9502	32.9643	32.9007	33.0437	33.9374	33.5345	34.1123	457534200	384020400	255211700	260392400	445254900	323815600	1233423000	497324300	960319200	11	11	10	10	11	10	10	10	10
CDIF630erm_01330	FabD	malonyl CoA-acyl carrier protein transacylase	Cytoplasmic	Fatty acid and phospholipid metabolism	Biosynthesis	x		x		30.5123	30.2909	30.1463	30.0215	30.6829	30.194	31.6559	31.3939	30.7664	69255200	48217840	42181350	31778280	60408560	44921870	268358000	181537400	83780100	19	20	18	17	16	12	16	15	13
CDIF630erm_01331	FabG1	3-oxoacyl-[acyl-carrier-protein] reductase	Cytoplasmic	Fatty acid and phospholipid metabolism	Biosynthesis	x		x		30.3117	30.2776	29.6827	29.733	29.7383	29.8989	30.9005	30.5975	31.3241	69123200	53412840	33884260	24855670	48152020	36557100	174597700	26027130	243648900	13	12	12	10	11	9	6	6	10
CDIF630erm_01332	AcpP2	acyl carrier protein (ACP)	Cytoplasmic	Fatty acid and phospholipid metabolism	Biosynthesis					26.7131	26.4449	27.1168	26.3148	NaN	NaN	NaN	NaN	NaN	-2813900	-3371462	-2387415	-3781149	-6577091	-6456996	-5713621	-1256491	-5669544	3	2	2	2	0	0	0	1	1
CDIF630erm_01333	FabF	3-oxoacyl-[acyl-carrier-protein] synthase 2	CytoplasmicMembrane	Fatty acid and phospholipid metabolism	Biosynthesis					30.6154	30.8613	30.2708	30.3107	30.231	30.4709	30.4559	31.0277	30.9295	77376200	90968310	47920550	64283450	50223230	51266200	39571960	77399100	82427260	18	21	19	15	13	10	8	11	12
CDIF630erm_01334	CDIF630erm_01334	putative diguanylate kinase signaling protein	CytoplasmicMembrane	Signal transduction	Other					27.3217	27.6488	28.765	28.1756	28.2509	28.4367	28.5711	26.6818	27.572	-5050200	-2430501	3282463	-931555	-1319849	-1661827	-2043761	3538730	-3350703	14	18	21	16	10	11	7	3	4
CDIF630erm_01335	CDIF630erm_01335	transcriptional regulator, sigma-54-dependent	Cytoplasmic	Transcription	Transcription factors	x	x	x		25.591	25.2866	25.1765	26.7461	27.0646	26.7455	25.3648	NaN	25.8842	-6205330	-6116689	-6374706	-3905893	-3967690	-2938319	-5469517	-5724982	-5180728	6	5	5	7	7	7	2	1	3
CDIF630erm_01339	CDIF630erm_01339	putative N-acetyltransferase	Cytoplasmic	Protein fate	Protein modification and repair	x	x			31.0285	30.1765	29.6087	32.3666	32.4577	31.2386	31.2688	31.5603	31.8795	30861200	15116050	5049644	184744200	160377600	115619900	55909280	110957300	276590800	9	10	9	13	12	8	3	4	8
CDIF630erm_01340	Fbp	fructose-1,6-bisphosphatase	Cytoplasmic	Energy metabolism	Glycolysis/gluconeogenesis					NaN	NaN	NaN	25.322	25.3031	NaN	NaN	NaN	NaN	-6661926	-6758146	-6722046	-5855228	-6056318	-6365980	-5663445	-5848637	-5789689	2	0	0	3	3	1	1	0	1
CDIF630erm_01349	CDIF630erm_01349	alkaline shock protein	Unknown	Unknown function	Unknown function					26.7484	27.0287	27.7991	27.5867	27.8644	27.4951	NaN	26.2409	NaN	7011200	4353721	4260880	2068412	-1621691	3506491	-977648	-122550	-3728744	5	4	3	3	3	2	1	2	1
CDIF630erm_01350	NusB	N utilization substance protein B	Cytoplasmic	Transcription	Transcription factors		x			25.6654	26.0742	25.9628	24.7114	25.1017	24.7158	NaN	NaN	NaN	-2228600	-2600167	-5008423	-4987977	-4176177	-5498522	-4015667	-5848637	-5912021	6	6	4	4	3	2	2	0	0
CDIF630erm_01352	XseA	exodeoxyribonuclease 7 large subunit	Cytoplasmic	DNA metabolism	Degradation of DNA					NaN	NaN	NaN	23.8985	23.9015	24.2294	NaN	NaN	NaN	-6607860	-6758146	-6722046	-6320955	-6316103	-5722652	-5713621	-5556216	-5677680	1	0	0	3	3	4	0	1	1
CDIF630erm_01354	IspA	geranylgeranyl pyrophosphate synthase	Cytoplasmic	Biosynthesis of cofactors, prosthetic	Other	x	x	x		28.0548	27.6935	27.8025	28.1845	28.3775	28.0684	29.2229	28.9592	28.457	11742200	5291514	2475706	2949437	12027690	4179314	167622500	14704310	11682430	10	7	8	7	8	8	7	6	6
CDIF630erm_01356	Dxs	1-deoxy-D-xylulose-5-phosphate synthase	Cytoplasmic	Biosynthesis of cofactors, prosthetic groups, and carriers	Thiamine	x	x	x		26.1365	25.6442	25.6748	26.9647	26.7629	27.3316	27.6154	27.3654	27.6923	-5714000	-4865891	-5380304	1029449	-3075608	-945954	-1617794	-327345	-2708034	6	8	8	12	10	6	3	4	3
CDIF630erm_01357	YqxC	putative rRNA methyltransferase	Cytoplasmic	Unknown function	Unknown function	x				26.4757	26.2355	26.9358	26.7326	27.1884	27.2155	28.5051	27.4672	27.0584	-648400	-2696579	4904243	-4517004	-2532804	-3101821	18445570	24207830	13163790	6	6	6	3	3	2	4	2	3
CDIF630erm_01358	RecN	DNA repair protein RecN	Cytoplasmic	DNA metabolism	DNA replication, recombination, and repair					26.337	26.297	26.5285	26.2972	26.4513	26.2199	27.3308	26.2353	26.5465	-5764450	-3693357	-2811361	-3186573	-3351792	-821339	-2873170	-3513888	-4622361	7	9	11	10	8	12	5	4	6
CDIF630erm_01359	CDIF630erm_01359	hypothetical protein	Cytoplasmic	Unknown function	Unknown function	x	x	x		27.5472	27.8731	28.3442	29.3048	28.6207	28.7663	28.1594	27.6482	26.5394	1573700	1139138	8353503	16348440	10648360	11374600	-23406.2	1198320	-3540264	11	11	12	14	11	9	4	6	6
CDIF630erm_01360	CDIF630erm_01360	putative N-acetyltransferase	Unknown	Unknown function	Unknown function				x	24.9884	23.6939	24.7387	NaN	NaN	NaN	NaN	NaN	NaN	-5466800	-6254028	-6228068	-6677498	-6577091	-6456996	-5713621	-5566305	-5912021	4	4	3	0	0	0	0	1	0
CDIF630erm_01361	BltD	spermine/spermidine acetyltransferase	Cytoplasmic	Central intermediary metabolism	Nitrogen metabolism		x			24.9399	24.2656	25.0054	25.911	NaN	26.3719	NaN	NaN	NaN	-4351700	-6220510	-5937776	-3983248	-6577091	-1088539	-5713621	-5848637	-5912021	2	1	2	2	0	1	0	0	0
CDIF630erm_01363	Spo0A	stage 0 sporulation protein A	Cytoplasmic	Cellular processes	Sporulation and germination					27.1109	27.4626	26.9217	26.3245	26.9572	25.7311	26.683	NaN	NaN	324700	611382	-1761053	-2726877	823017	-4869938	-143583	-4808496	-4267093	10	10	8	8	9	6	4	1	1
CDIF630erm_01364	CDIF630erm_01364	putative thiamine diphosphokinase	Cytoplasmic	Unknown function	Unknown function	x		x		30.021	30.0767	30.339	30.69	30.2275	31.0811	30.0081	29.9214	30.0088	32035200	42724810	53323240	53194520	46445960	70400090	33512580	255911300	19761170	13	12	13	14	13	10	7	6	8
CDIF630erm_01365	CDIF630erm_01365	hypothetical protein	Unknown	Unknown function	Unknown function			x		32.5947	32.8112	33.9217	33.9853	33.8195	34.4244	33.5928	33.1149	32.6602	394044200	361830400	549660800	422221400	756380900	907002200	939046200	562871500	217005400	25	31	26	22	22	20	21	18	18
CDIF630erm_01366	CDIF630erm_01366	putative glycosyl transferase, family 2	CytoplasmicMembrane	Cell envelope	Biosynthesis and degradation of surface polysaccharides and lipopolysaccharides		x			27.4825	27.7794	27.5033	26.7848	27.2133	27.3469	26.8846	26.5853	27.7005	4928200	4542765	3858717	-3337545	6591673	767155	8104106	-3940392	17331310	8	10	8	5	4	6	4	2	5
CDIF630erm_01367	CDIF630erm_01367	putative glycosyl transferase	CytoplasmicMembrane	Cell envelope	Biosynthesis and degradation of murein sacculus and peptidoglycan					26.8582	28.3408	27.9197	28.1857	28.7209	NaN	NaN	NaN	25.437	-1572300	3782460	7994621	11234980	18694470	19654250	-4206566	-5848637	-4008044	2	2	3	3	3	2	1	0	2
CDIF630erm_01368	CDIF630erm_01368	hypothetical protein	Unknown	Unknown function	Unknown function					25.0535	24.8405	NaN	25.1551	25.4796	24.87	NaN	26.0232	NaN	-5620400	-6108275	-6513648	-4114200	-3956707	-4068190	-4521769	-2187036	-4470425	3	3	1	5	6	3	1	2	1
CDIF630erm_01369	NudF	ADP-ribose pyrophosphatase	Cytoplasmic	DNA metabolism	DNA replication, recombination, and repair					25.7689	26.165	26.3847	25.9849	26.0856	26.4018	NaN	26.2542	NaN	-1465700	-3951316	-4558382	7280828	4284654	-447494	-2817674	-779104	2067374	4	3	3	3	3	2	1	2	1
CDIF630erm_01372	DeoB	phosphopentomutase	Cytoplasmic	Purines, pyrimidines, nucleosides, and nucleotides	Other					25.3953	24.5755	24.9226	24.793	25.1372	24.8134	NaN	NaN	NaN	-5282000	-6085404	-5480306	-5469910	-5377486	-5520028	-5713621	-5050358	-5631874	5	3	3	5	6	2	0	2	1
CDIF630erm_01373	PupG	purine-nucleoside phosphorylase	Cytoplasmic	Purines, pyrimidines, nucleosides, and nucleotides	Salvage of nucleosides and nucleotides	x	x	x		28.4111	28.4281	27.8758	28.9839	29.1464	29.1943	29.6901	29.6315	30.0437	25592200	19299800	10752860	3438473	34638100	19114590	132423400	18710690	166243600	9	9	8	9	9	8	9	8	10
CDIF630erm_01374	Pdp	pyrimidine-nucleoside phosphorylase	Cytoplasmic	Purines, pyrimidines, nucleosides, and nucleotides	Other					NaN	NaN	NaN	24.5618	24.5731	NaN	NaN	NaN	NaN	-6745800	-6658007	-6722046	-5601433	-6093490	-6456996	-5713621	-5848637	-5622981	0	1	0	3	3	1	0	0	1
CDIF630erm_01375	CDIF630erm_01375	uncharacterized protein, YceG-like	Unknown	Unknown function	Unknown function	x		x		31.3241	31.6988	32.2193	31.8984	31.8173	32.2502	30.7309	30.6619	30.873	95804200	90423470	135229200	79087720	145468200	195013900	62877500	41488740	19598080	25	26	27	27	24	23	14	15	13
CDIF630erm_01376	CDIF630erm_01376	putative O-methyltransferase	Cytoplasmic	Unknown function	Unknown function					25.2971	25.1208	24.5898	24.9202	24.9322	24.5531	24.6852	NaN	25.6753	-2683800	-3131862	-4642447	-6269518	-5247489	-5980572	-5382235	-3198426	-2876982	5	5	5	3	4	2	2	2	3
CDIF630erm_01377	YrrO	putative protease YrrO	Cytoplasmic	Energy metabolism	Amino acids and amines					27.3974	27.5571	27.3755	27.2396	27.0537	27.5845	27.3675	27.6101	27.6042	-1054800	4565880	2021025	335380	-1384990	2755131	2281359	4360767	3375952	11	11	11	8	5	5	2	5	4
CDIF630erm_01381	CDIF630erm_01381	putative lipoprotein	Unknown	Transport and binding proteins	Unknown substrate	x		x		29.3063	29.5046	30.0679	30.1279	29.1212	29.8058	27.2141	27.8398	27.9067	20383200	17347440	13914720	9306901	20530620	19244020	4248027	16598800	6514556	17	17	15	15	15	13	2	4	5
CDIF630erm_01386	CDIF630erm_01386	putative phage protein	Unknown	Unknown function	Unknown function				x	26.0391	25.0041	26.8801	26.8369	NaN	26.8949	NaN	NaN	NaN	-4422500	-4926691	-3521217	-1186111	-4857026	1263600	-5713621	-5848637	-5912021	2	3	2	4	1	3	0	0	0
CDIF630erm_01398	Efp	elongation factor P (EF-p)	Cytoplasmic	Protein synthesis	Translation factors					NaN	24.8232	25.096	NaN	NaN	NaN	NaN	NaN	NaN	-5905960	-4893200	-3895257	-6677498	-6577091	-6456996	-5713621	-5848637	-5912021	2	3	5	0	0	0	0	0	0
CDIF630erm_01399	CDIF630erm_01399	uncharacterized protein	Cytoplasmic	Unknown function	Unknown function					29.372	30.0219	28.3951	29.4748	29.1925	28.4999	29.585	NaN	30.2471	147994200	136768300	48567320	95376220	205172700	158279500	349253500	84503050	511768000	3	2	2	2	3	3	3	1	3
CDIF630erm_01401	CDIF630erm_01401	putative radical SAM-superfamily protein	Cytoplasmic	Protein fate	Protein modification and repair					26.515	25.6155	25.3266	26.2308	25.5084	NaN	26.508	NaN	25.5491	-2526600	-4001690	-3891892	-5164671	-4877098	-6008942	-1843047	-4476841	-4845765	10	8	9	4	4	1	4	1	3
CDIF630erm_01402	Smc	structural maintenance chromosome protein SMC	Cytoplasmic	DNA metabolism	Chromosome-associated proteins					30.3976	30.2138	29.5136	30.3371	30.1478	28.2629	25.5151	28.2564	30.0854	-3445500	-2141173	-1311710	7010621	498068	-2683492	-5497215	52412720	-1390651	40	44	41	48	34	21	2	9	19
CDIF630erm_01403	FtsY	signal recognition particle receptor	CytoplasmicMembrane	Protein fate	Protein and peptide secretion and trafficking	x	x	x		27.1956	27.2836	28.7015	26.9208	27.0205	26.9407	26.8362	26.076	25.5961	-2166000	2493820	4548764	678846	-11835.1	291330	-4032530	-2310984	-4761696	9	11	12	10	8	5	3	4	4
CDIF630erm_01405	Ffh	signal recognition particle protein	CytoplasmicMembrane	Protein fate	Protein and peptide secretion and trafficking		x			27.1127	27.485	27.7953	28.4943	27.9708	28.2424	27.5262	27.694	28.5726	-4324600	-1300960	-2045313	2906623	-917361	3583930	-3483240	-583862	2161397	14	15	12	14	12	10	5	5	9
CDIF630erm_01406	RpsP	30S ribosomal protein S16	Cytoplasmic	Protein synthesis	Ribosomal proteins: synthesis and modification		x			27.813	28.8125	29.1949	26.6917	26.7585	26.4132	27.0423	NaN	NaN	15676200	23906210	29203220	-79825.9	-3155424	1154790	1696324	9316034	-2024589	5	6	5	3	2	3	2	1	1
CDIF630erm_01407	CDIF630erm_01407	putative RNA-binding protein	Cytoplasmic	Regulatory functions	RNA interactions				x	25.8885	26.7253	27.3998	NaN	NaN	NaN	NaN	NaN	NaN	-1936000	1269488	3857259	-6677498	-6577091	-6456996	-5713621	-2193093	-5912021	2	2	2	0	0	0	0	1	0
CDIF630erm_01408	RimM	16S rRNA processing protein RimM	Cytoplasmic	Transcription	RNA processing					24.1941	24.9066	25.5102	NaN	NaN	NaN	NaN	NaN	24.4515	-5192300	-4974850	-4677940	-6677498	-6577091	-6174954	-3927328	-4739812	7440.65	3	2	3	0	0	1	1	1	2
CDIF630erm_01410	RplS	50S ribosomal protein L19	Cytoplasmic	Protein synthesis	Ribosomal proteins: synthesis and modification			x		32.4534	33.0137	32.3204	32.3998	32.7939	32.0153	33.1204	32.9835	32.8129	431864200	273243600	207545500	292869500	240025600	277856500	374890700	650796200	274035400	11	11	10	9	9	7	6	8	7
CDIF630erm_01411	CDIF630erm_01411	putative GTPase, MG442 type	Cytoplasmic	Protein synthesis	Other	x	x			25.9083	25.7667	25.6591	25.9785	26.5081	25.9855	28.0431	27.4367	26.1746	-2955600	-2015330	-3363372	-2531177	568661	-3888544	12828500	10407290	29687.5	4	6	5	4	6	3	2	3	3
CDIF630erm_01414	NrdZ	vitamin B12-dependent ribonucleoside-diphosphate reductase	Cytoplasmic	Purines, pyrimidines, nucleosides, and nucleotides	2'-Deoxyribonucleotide metabolism		x			30.6526	30.6914	30.0456	31.4985	31.1716	30.7266	31.4218	31.4159	30.7204	6789200	17454760	3529012	71638020	41689260	30623000	28502950	50532940	19051680	24	24	21	28	24	26	12	21	15
CDIF630erm_01415	RnhB	ribonuclease HII	Cytoplasmic	DNA metabolism	Restriction/modification					25.4273	25.0409	24.5038	NaN	NaN	NaN	NaN	NaN	NaN	-3523400	-4927613	-5382971	-6677498	-6577091	-6085655	-1001935	-5848637	-4212457	7	6	6	0	0	1	3	0	1
CDIF630erm_01416	CDIF630erm_01416	putative (S)-2-hydroxy-acid oxidase	Cytoplasmic	Energy metabolism	Electron transport	x				NaN	24.3619	NaN	25.1659	25.1551	NaN	26.1057	NaN	NaN	-6622560	-6029485	-5655294	-5166888	-4117854	-5330218	2450887	-4151057	-4553594	1	2	1	2	2	1	2	1	1
CDIF630erm_01420	CDIF630erm_01420	ABC-type transport system, multidrug-family permease	CytoplasmicMembrane	Cellular processes	Toxin production and resistance					NaN	NaN	NaN	25.4726	NaN	25.2129	NaN	NaN	NaN	-6648678	-6672020	-6298653	-5977755	-6265487	-5214323	-5598777	-5848637	-5912021	2	2	2	3	1	4	1	0	0
CDIF630erm_01421	CDIF630erm_01421	ABC-type transport system, multidrug-family ATP-binding protein	CytoplasmicMembrane	Cellular processes	Toxin production and resistance					25.6515	25.7785	26.861	NaN	25.4075	NaN	NaN	NaN	NaN	-4511000	-3079274	28691.2	-6205746	-5405417	-5282965	-1994432	-4505824	-5912021	3	3	3	1	3	1	1	1	0
CDIF630erm_01422	CDIF630erm_01422	two-component response regulator	Cytoplasmic	Signal transduction	Two-component systems					26.394	25.6614	26.7608	NaN	NaN	26.4912	NaN	NaN	28.3597	-4215800	-2916527	-5473195	-6600662	-6508189	-5346392	-5482542	-5848637	3224133	5	6	3	1	1	3	1	0	5
CDIF630erm_01427	TopA	DNA topoisomerase I	Cytoplasmic	DNA metabolism	DNA replication, recombination, and repair	x	x	x		26.7867	26.9837	26.6606	26.3518	26.2748	25.4228	27.5604	27.3653	27.0958	-5882210	-4250055	-5054456	-3840955	-5051879	-6283336	-2970192	-44034.3	-4080322	9	10	10	9	8	2	3	5	5
CDIF630erm_01428	CodY	transcriptional regulator, GTP-sensing pleiotropic repressor	Cytoplasmic	Regulatory functions	DNA interactions	x		x		30.0841	29.7739	29.2625	28.383	28.6223	29.2806	30.4521	29.6546	30.2546	80593200	55514630	32787670	5024509	18868180	13255520	177738800	37175050	127251600	16	16	15	12	12	9	12	7	15
CDIF630erm_01429	CDIF630erm_01429	putative replication-associated recombination protein a rara	Cytoplasmic	DNA metabolism	DNA replication, recombination, and repair	x	x	x		26.5438	25.9382	25.3799	28.7978	28.873	28.986	27.9159	28.5649	28.5712	-4227800	-5112318	-5856631	7548180	7792121	13799790	3993272	7128949	10406240	7	4	6	8	9	7	4	3	6
CDIF630erm_01431	IscR	transcriptional regulator of cysteine biosynthesis	Unknown	Unknown function	Unknown function					25.7235	25.7339	25.6686	NaN	NaN	NaN	NaN	26.9714	NaN	-2884500	-3758216	-3432263	-5283079	-5936869	-6096614	-3328457	2270449	-3567267	5	5	4	1	1	1	1	2	1
CDIF630erm_01432	IscS2	cysteine desulfurase	Cytoplasmic	Biosynthesis of cofactors, prosthetic	Thiamine	x	x	x		33.5409	33.481	33.7255	31.8934	31.4622	32.2338	33.315	33.7618	33.4857	570714200	612194700	437488100	118619700	76538470	139457200	621388200	877694000	736633600	26	25	19	18	16	16	16	18	17
CDIF630erm_01433	CDIF630erm_01433	fe-s iron-sulfur cluster assembly protein, nifu family	Unknown	Biosynthesis of cofactors, prosthetic groups, and carriers	Other	x	x	x		30.4332	30.5932	30.3687	27.9605	27.6726	28.0193	31.4812	30.6168	30.7008	65847200	50147900	37628210	10116570	1440390	5157069	29451060	59971080	15453110	8	8	8	7	5	5	4	5	4
CDIF630erm_01434	MnmA	transfer RNA-specific 2-thiouridylase MnmA	Cytoplasmic	Protein synthesis	tRNA and rRNA base modification					28.8218	27.9217	28.1833	28.8068	28.8628	28.9749	28.7974	28.9919	30.2285	15558200	11146120	3921449	6353182	2401931	11033470	15205130	22767750	32978480	12	11	12	9	7	7	9	7	7
CDIF630erm_01436	AlaS	alanine-tRNA synthetase	Cytoplasmic	Protein synthesis	tRNA aminoacylation	x	x			34.079	33.7786	33.1007	32.5767	32.5278	31.8853	31.8092	32.7689	32.4613	91756200	131377600	62377980	120565400	47934690	23978130	38022180	66926270	32543310	47	49	42	40	34	25	17	25	23
CDIF630erm_01438	CDIF630erm_01438	putative membrane protein	CytoplasmicMembrane	Hypothetical proteins	Domain	x	x			33.2125	33.131	33.5024	32.4775	32.4606	32.7339	32.7148	31.7966	32.2247	37097200	84157760	183727000	71638020	41042460	60635700	44184330	58251490	39841170	25	27	27	26	24	23	13	20	19
CDIF630erm_01439	CDIF630erm_01439	putative holliday junction resolvase	Cytoplasmic	Unknown function	Unknown function				x	25.6134	25.1753	26.5448	25.2586	NaN	NaN	NaN	NaN	NaN	-2124800	-6089269	-5495989	-6076143	-6314087	-5972088	-5713621	-5848637	-5912021	3	3	3	2	1	1	0	0	0
CDIF630erm_01441	Fur	transcriptional regulator, Fur family	Cytoplasmic	Regulatory functions	DNA interactions					29.1872	28.5577	28.6414	28.7521	27.7382	28.8073	28.5931	NaN	NaN	14428200	3810527	3876710	3038872	-7669.14	1641584	-2242965	-1812395	-4585367	9	10	10	6	7	4	2	1	1
CDIF630erm_01443	CDIF630erm_01443	ribonuclease J family protein	Cytoplasmic	Unknown function	Unknown function	x	x	x		29.6936	29.4173	29.4538	30.1769	30.4167	29.994	29.6977	29.6933	29.756	4238200	12414940	8177952	35183930	23522130	24175570	5428028	10920550	4520611	18	19	19	17	16	12	8	10	9
CDIF630erm_01446	CDIF630erm_01446	peptidyl-tRNA hydrolase	Cytoplasmic	Unknown function	Unknown function				x	23.6075	24.5132	23.6884	25.6811	NaN	NaN	NaN	NaN	NaN	-6058960	-5809989	-6128040	-4406832	-5717598	-5435301	-5713621	-5848637	-5912021	2	2	2	3	1	1	0	0	0
CDIF630erm_01448	CDIF630erm_01448	putative membrane-associated peptidase, M25 family	CytoplasmicMembrane	Protein fate	Degradation of proteins, peptides, and glycopeptides					29.2446	28.9186	28.7394	29.5231	29.2077	29.8205	NaN	NaN	NaN	19858200	24680550	29678810	50249840	34790380	29418630	12823880	-5514978	-3093545	3	3	2	5	2	2	1	1	1
CDIF630erm_01449	ScpA	segregation and condensation protein A	Cytoplasmic	Cellular processes	Cell division					NaN	24.6786	NaN	25.1722	NaN	24.8126	NaN	NaN	NaN	-5832590	-4992380	-5065948	-5173224	1018903	-5479226	-5713621	-5848637	-4643783	2	2	1	3	2	2	0	0	1
CDIF630erm_01450	ScpB	segregation and condensation protein B	Cytoplasmic	DNA metabolism	Chromosome-associated proteins		x			NaN	24.4352	24.8747	25.3025	25.9323	NaN	NaN	NaN	26.4018	-5884970	-5654531	-5793582	-3441762	-3029499	-5608142	-3920155	-3960661	4593514	1	2	2	3	3	1	1	1	2
CDIF630erm_01453	CDIF630erm_01453	transcriptional regulator, MarR family	Cytoplasmic	Regulatory functions	DNA interactions		x			26.8238	26.8163	26.7367	27.5478	27.2622	27.2159	NaN	NaN	NaN	-2735900	-3933233	-4292789	-822333	-3787607	-1282090	-2761676	-346216	-3824695	4	5	5	6	5	4	1	1	1
CDIF630erm_01454	PepA	cytosol aminopeptidase	Cytoplasmic	Protein fate	Degradation of proteins, peptides, and glycopeptides					NaN	NaN	NaN	25.2834	25.3349	24.5442	NaN	24.5872	23.9785	-5723800	-5974941	-2716692	-4891806	-5681316	-5071767	-5611204	-4675927	-5321521	3	3	3	2	3	2	1	2	2
CDIF630erm_01457	CDIF630erm_01457	putative MazG-like pyrophosphohydrolase	Cytoplasmic	Unknown function	Unknown function					27.5231	26.9588	25.9983	26.1684	25.1204	27.5379	NaN	28.8528	26.6411	9862200	2334494	734299	-3361366	-6115125	1507984	-5713621	11065870	-4333340	5	5	3	4	2	4	0	1	2
CDIF630erm_01458	NpdA	NAD-dependent deacetylase, Sir2 family	Unknown	Protein fate	Protein modification and repair	x	x			29.4618	29.4821	28.4169	26.3228	26.5906	25.5242	27.2384	25.8338	28.665	41555200	36391400	11851880	-2408144	4031850	-3720241	8793537	-3788765	29334060	11	10	8	5	7	3	3	3	5
CDIF630erm_01459	Acd	mannosyl-glycoprotein endo-beta-N-acetylglucosamidase	Extracellular	Protein fate	Degradation of proteins, peptides, and glycopeptides		x	x		26.9013	27.0198	26.4685	26.0752	26.2619	26.4483	26.7146	NaN	26.8847	-2864900	-3204840	-4392664	-4604496	-3207783	-1713676	-2026269	-5745769	-2770770	8	6	7	6	6	7	4	1	4
CDIF630erm_01460	PolC	DNA polymerase III PolC-type	Cytoplasmic	DNA metabolism	DNA replication, recombination, and repair					28.9015	28.8571	27.899	28.242	27.875	28.1688	28.8392	25.1146	28.3356	-5470500	-4596307	-4364092	-3662424	-4822278	-4401705	-4631174	-5131600	-4030367	22	21	22	20	14	10	7	4	11
CDIF630erm_01461	RimP	ribosome maturation factor rimp	Cytoplasmic	Unknown function	Unknown function					27.4483	26.1006	27.3783	25.6775	24.4798	NaN	27.0467	27.7606	25.3074	3500200	935069	2041935	-2440011	-5131600	-5391966	-1677568	4633580	2405.06	4	4	5	3	2	1	2	2	2
CDIF630erm_01462	NusA	transcription elongation protein	Cytoplasmic	Transcription	Transcription factors		x			30.2076	30.4314	30.1875	30.0326	29.4684	29.754	29.5989	30.8739	30.8554	22761200	60883820	37963260	30994780	25089220	48192750	30683260	75038750	45552430	24	27	22	17	14	13	12	10	10
CDIF630erm_01465	InfB	translation initiation factor IF-2	Cytoplasmic	Protein synthesis	Translation factors		x			32.5559	32.5814	32.3586	31.8545	31.2903	31.0945	31.5738	32.7273	32.2444	54692200	106777100	52885580	78355120	53451280	40674770	86416310	176797100	78519040	31	31	26	25	21	18	15	23	20
CDIF630erm_01466	RbfA	Ribosome-binding factor A	Cytoplasmic	Protein synthesis	Translation factors					NaN	23.8188	24.8094	NaN	NaN	NaN	NaN	NaN	NaN	-6585620	-6466982	-6305015	-6677498	-6577091	-6456996	-5713621	-5848637	-5912021	1	2	2	0	0	0	0	0	0
CDIF630erm_01467	CDIF630erm_01467	putative rna-binding protein	Unknown	Transport and binding proteins	Nucleosides, purines and pyrimidines					26.0681	25.8278	25.7759	25.9256	26.6435	NaN	NaN	NaN	NaN	1471200	-1216357	-2923109	-1866849	1464340	-5001830	-2858824	-5848637	-701266	4	4	4	5	4	2	2	0	2
CDIF630erm_01469	CDIF630erm_01469	putative rna-binding protein	Cytoplasmic	Unknown function	Unknown function	x				25.4233	25.4451	24.9324	25.0781	25.0385	NaN	NaN	24.3302	NaN	-116700	-2913390	-4652924	-4474241	-1039973	-5440457	-5713621	-3612464	-5912021	4	4	3	3	4	2	0	2	0
CDIF630erm_01471	RibF	riboflavin biosynthesis protein	Cytoplasmic	Unknown function	Unknown function					26.5047	26.0717	25.5986	26.0616	26.6633	26.3895	27.2721	26.7915	NaN	-3094100	-5082241	-4829245	-2697481	2961500	-3420281	4100556	-1474566	-4460434	5	4	4	6	7	2	3	2	1
CDIF630erm_01472	RpsO	30S ribosomal protein S15	Cytoplasmic	Protein synthesis	Ribosomal proteins: synthesis and modification	x				28.2555	28.1397	29.1074	25.2726	NaN	NaN	26.4875	26.4442	NaN	9237200	13939680	23776700	-5459140	-6577091	-3988119	295982	1418336	-5486644	4	4	3	2	0	1	1	1	1
CDIF630erm_01473	CDIF630erm_01473	uncharacterized protein DegV family	Cytoplasmic	Unknown function	Unknown function	x	x			27.9043	27.8386	28.1962	25.7549	26.3398	26.3468	NaN	NaN	26.6542	12381200	5171813	8333565	-4205177	-406654	-4662689	-1018168	-5848637	-2722795	6	5	4	4	3	4	1	0	2
CDIF630erm_01474	Pnp	polyribonucleotide nucleotidyltransferase	Cytoplasmic	Transcription	Degradation of RNA		x			29.7692	29.7189	29.409	30.667	29.9146	29.9148	29.492	30.4803	30.2305	-122900	5559809	-1742195	36083510	15300840	15817820	5410475	63253340	12885710	23	23	23	26	20	17	10	12	8
CDIF630erm_01476	CDIF630erm_01476	putative peptidase, M16 family	Cytoplasmic	Protein fate	Degradation of proteins, peptides, and glycopeptides					23.58	NaN	23.8446	NaN	NaN	NaN	NaN	NaN	NaN	-6286780	-6144718	-6053651	-6452389	-6577091	-5529337	-5713621	-5152685	-5292232	2	2	3	2	0	2	0	1	1
CDIF630erm_01478	DapG	aspartokinase	Cytoplasmic	Amino acid biosynthesis	Aspartate family					32.1748	31.6184	31.342	31.6669	32.1087	31.4842	31.2297	31.7926	32.0015	171144200	145725200	76344250	117953700	139658100	109407200	48208900	123610700	139382100	20	18	17	14	14	13	10	9	14
CDIF630erm_01480	FtsK	DNA FtsK/SpoIIIE translocase	CytoplasmicMembrane	DNA metabolism	DNA replication, recombination, and repair	x				31.091	31.4199	32.4905	31.024	30.7396	31.3648	30.7752	30.7641	30.4911	6804200	18830080	33451940	37942130	24752150	26641340	9373260	82992680	6383029	34	35	38	31	28	21	15	22	20
CDIF630erm_01481	SelU	tRNA 2-selenouridine synthase	Cytoplasmic	Protein synthesis	tRNA and rRNA base modification					25.4302	25.3851	25.1565	25.3542	25.4118	24.9565	25.4808	26.0366	25.1262	-4776700	-5771055	-4774513	-4635983	-4710176	-4923084	-2730971	2853835	-5358164	6	4	6	6	7	5	5	4	2
CDIF630erm_01482	RimO	ribosomal protein S12 methylthiotransferase	Cytoplasmic	Protein synthesis	Ribosomal proteins: synthesis and modification	x	x			31.286	31.1918	31.1263	30.6394	30.6137	30.3521	29.9617	30.2079	30.7538	69168200	100379300	69137420	53641700	38106390	54758640	12191040	22269200	39437570	30	32	29	23	20	19	7	10	15
CDIF630erm_01483	PgsA	CDP-diacylglycerol-glycerol-3-phosphate 3-phosphatidyltransferase	CytoplasmicMembrane	Fatty acid and phospholipid metabolism	Biosynthesis					29.0509	28.5023	28.2217	29.1308	27.9364	28.8553	28.4956	26.3259	27.0987	11549200	1526143	5140580	22963740	13382630	14001610	-1249713	-1791892	-4165561	6	5	7	7	8	7	3	2	2
CDIF630erm_01484	RecA	protein RecA (Recombinase a)	Cytoplasmic	DNA metabolism	DNA replication, recombination, and repair	x		x		31.0034	30.6712	30.6023	30.6702	31.0828	30.6996	31.1844	31.4679	31.7187	111184200	80608020	56080510	51520000	80936660	49642820	129594100	166188500	135473900	17	18	16	13	15	10	10	12	13
CDIF630erm_01485	CDIF630erm_01485	RNase Y	Cytoplasmic	Transcription	Degradation of RNA					33.8733	33.7361	33.5089	33.9471	33.4499	33.9969	34.3322	33.8562	33.4354	229074200	296473800	286562900	276709500	195807100	336232200	182750700	169000000	133384500	41	42	40	39	31	33	17	19	21
CDIF630erm_01486	CDIF630erm_01486	putative DNA helicase, UvrD/REP type	Cytoplasmic	DNA metabolism	DNA replication, recombination, and repair	x		x		25.4632	26.4133	26.5153	26.2039	26.0704	26.6784	27.6384	27.6249	27.0475	-5838630	-4640131	-4665178	-2950516	-4091438	-1533382	-2420399	5950081	-307653	5	6	4	7	6	4	3	7	5
CDIF630erm_01487	SpsB3	signal peptidase IB	Cellwall	Protein fate	Protein and peptide secretion and trafficking	x	x			30.7805	31.7831	31.6868	29.662	28.8529	29.0955	27.934	30.0689	NaN	43576200	72980190	94400230	15562560	8880951	9701642	3998238	51172070	-1687323	14	12	13	9	8	7	2	4	1
CDIF630erm_01488	UppP1	undecaprenyl-diphosphatase	CytoplasmicMembrane	Cell envelope	Biosynthesis and degradation of murein sacculus and peptidoglycan				x	25.0944	26.4774	25.6595	25.5606	25.7136	27.5866	NaN	NaN	NaN	-5891130	-5188617	-5854473	-115938	-1378835	177913	-5713621	-5848637	-5912021	2	1	1	3	3	2	0	0	0
CDIF630erm_01489	CDIF630erm_01489	putative phage tyrosine recombinase	Cytoplasmic	DNA metabolism	DNA replication, recombination, and repair					26.0708	25.7038	NaN	25.8295	26.1861	26.8721	27.0027	26.1844	NaN	-5959110	-6495980	-6722046	-2606442	-2337288	340031	995691	-2557483	-5341863	5	1	0	6	5	6	4	4	1
CDIF630erm_01490	PurB	adenylosuccinate lyase	Cytoplasmic	Purines, pyrimidines, nucleosides, and nucleotides	Purine ribonucleotide biosynthesis					24.3279	26.0691	25.2353	27.0686	27.3444	25.6198	NaN	NaN	NaN	-6531540	-6242034	-6077779	199801	-1432235	-3594241	-5496762	-5249398	-5866612	3	2	3	5	7	4	1	1	1
CDIF630erm_01493	CDIF630erm_01493	transcriptional regulator, RpiR family	Unknown	Regulatory functions	DNA interactions			x		25.2498	25.2097	25.0073	25.3439	26.1255	NaN	25.0564	NaN	25.1877	-1532400	-3884151	-4223200	-5613596	-2174911	-6424078	-1081843	-5549204	466056	7	6	4	3	2	1	3	1	3
CDIF630erm_01494	MalH2	maltose-6'-phosphate glucosidase	Cytoplasmic	Energy metabolism	Sugars	x	x			25.8262	25.7193	25.4707	25.8444	26.1184	26.1682	NaN	26.1166	26.5282	-5429500	-3866345	-5496687	-1907078	-3832486	-3851131	-4844220	-2015558	-3561416	4	3	3	8	5	4	1	2	3
CDIF630erm_01495	CDIF630erm_01495	putative alanine aminotransferase	Cytoplasmic	Amino acid biosynthesis	Aspartate family	x	x	x		30.1147	30.0328	30.3091	29.5748	29.5525	29.6621	30.2729	30.5256	30.6082	34013200	41775460	24842650	22741590	19998400	13255300	19919130	106094400	37085870	18	19	19	17	15	11	12	13	15
CDIF630erm_01499	GlnA	glutamine synthetase	Cytoplasmic	Amino acid biosynthesis	Glutamate family	x	x			25.6496	25.507	25.2857	26.198	27.0214	26.1898	26.2031	25.769	26.1763	-6143290	-5849273	-5968634	-2943738	-3634319	-3323064	-4118478	-3032307	-2716134	5	4	6	7	6	3	5	5	5
CDIF630erm_01502	CDIF630erm_01502	putative membrane protein	CytoplasmicMembrane	Unknown function	Unknown function	x	x			28.1043	28.0021	29.1749	27.3545	NaN	27.6157	NaN	NaN	25.9238	-4261200	-2063029	10664840	4312362	-6346325	4856086	-5713621	-5848637	-5376904	6	11	12	7	1	2	0	0	2
CDIF630erm_01503	CDIF630erm_01503	hypothetical protein	CytoplasmicMembrane	Unknown function	Unknown function					26.614	26.7464	28.0533	26.8778	26.92	NaN	NaN	NaN	NaN	-4390800	1719480	7367306	-1924817	1487550	-6175263	-256461	-4131533	-5912021	5	9	8	3	2	1	1	1	1
CDIF630erm_01504	CDIF630erm_01504	putative lipoprotein	Unknown	Unknown function	Unknown function				x	24.7803	23.8816	25.3677	24.4806	NaN	NaN	NaN	NaN	NaN	-5424700	-5819123	-3380262	-6028121	-6501117	-6400578	-5713621	-5848637	-5912021	4	4	4	2	1	1	0	0	0
CDIF630erm_01505	CprA	ABC-type transport system, lantibiotic/multidrug-family ATP-binding protein	CytoplasmicMembrane	Cellular processes	Toxin production and resistance					25.8086	NaN	NaN	25.7356	27.7041	26.0557	NaN	NaN	25.7904	-4697200	-6449398	-6683513	-6120763	9393950	87969.4	-4188697	-5160188	-4225058	2	1	1	2	9	2	1	1	2
CDIF630erm_01508	CprK	two-component sensor histidine kinase	CytoplasmicMembrane	Signal transduction	Two-component systems		x			28.5984	28.4735	28.4945	28.4147	28.0047	28.4664	NaN	NaN	28.5921	1202300	1039167	5389075	1211172	222940	-3490395	-5713621	-4117041	4542407	7	8	10	7	5	4	0	2	3
CDIF630erm_01509	CDIF630erm_01509	putative pyridoxine kinase	Unknown	Biosynthesis of cofactors, prosthetic	Pyridoxine					24.5799	24.716	NaN	NaN	NaN	NaN	NaN	NaN	NaN	-4581100	-4918572	-3828017	-6346994	-5524431	-3740686	29661240	-4749038	-386862	3	3	3	2	2	2	2	2	2
CDIF630erm_01511	CspB	cold shock protein CspB	Cytoplasmic	Cellular processes	Adaptations to atypical conditions	x	x	x		29.91	29.974	30.2626	26.4653	25.1611	24.857	28.7529	29.1088	28.8665	47935200	48890640	55720660	-634489	-4042014	-3347516	10105420	28701320	4159852	3	3	3	2	2	2	2	2	2
CDIF630erm_01512	CDIF630erm_01512	putative CBS domain-containing protein	Unknown	Unknown function	Unknown function	x		x		29.5269	29.2135	29.2908	29.3368	29.0233	29.0053	30.1961	29.9025	29.9304	28086200	12906130	5802422	12320560	3281570	14199710	8686138	38033210	8085360	10	11	11	9	8	8	4	6	5
CDIF630erm_01513	CDIF630erm_01513	putative peptidyl-prolyl isomerase	Cytoplasmic	Protein fate	Protein folding and stabilization	x		x		31.0741	30.7224	29.8106	29.1304	28.4417	29.8465	30.8821	30.6251	31.051	101954200	75168660	36907040	971411	5510974	9699668	204207400	64355060	164297000	24	23	22	16	12	12	19	13	21
CDIF630erm_01535	CDIF630erm_01535	putative membrane protein	Unknown	Unknown function	Unknown function					34.5148	34.8723	34.2675	35.223	34.0492	34.211	34.1724	34.2908	34.0189	688724200	830371900	750839200	1366046000	820690700	731699500	378678500	600646900	226595600	16	20	16	17	15	15	10	11	11
CDIF630erm_01540	CDIF630erm_01540	transporter, major facilitator superfamily (MFS)	CytoplasmicMembrane	Transport and binding proteins	Unknown substrate					NaN	23.8272	24.8649	NaN	NaN	NaN	NaN	NaN	NaN	-6745800	-6709002	-6288456	-6677498	-6577091	-6428004	-5713621	-5848637	-5683801	0	2	3	0	0	1	0	0	1
CDIF630erm_01543	CDIF630erm_01543	transcriptional regulator, GntR family	Unknown	Regulatory functions	DNA interactions					24.4448	24.143	24.8806	24.352	25.2225	24.4927	NaN	NaN	NaN	-5603600	-6044348	-5779487	-6064315	-5528502	-5387193	-4900836	-5848637	-4928034	5	4	4	3	3	4	2	0	1
CDIF630erm_01544	CDIF630erm_01544	putative lamB-like protein, UPF0271 family	Cytoplasmic	Cellular processes	Other		x			28.9124	28.6275	28.206	26.9422	27.2691	26.7466	28.3859	NaN	26.687	24694200	13247070	6112189	-93763.7	2325055	-814563	20446880	-5726732	609908	7	7	7	6	4	5	4	1	2
CDIF630erm_01545	CDIF630erm_01545	putative transporter, NRAMP family	CytoplasmicMembrane	Transport and binding proteins	Cations and iron carrying compounds	x				29.7904	29.5599	30.0263	29.3508	29.3946	30.4613	NaN	NaN	28.0814	2384600	18912630	34976460	18182330	17822960	21091160	-2969814	-4299050	-389022	6	6	6	7	6	6	1	1	2
CDIF630erm_01546	KipI	kinase A inhibitor	Cytoplasmic	Unknown function	Unknown function			x		27.1195	27.7861	26.6053	27.0813	26.8644	24.9864	27.4053	27.9042	28.7572	4781200	7743314	14029000	16142930	-2570582	-6116294	7891618	-4161192	16881110	8	7	7	5	5	2	4	2	6
CDIF630erm_01549	CDIF630erm_01549	L-ala-D/L-glu epimerase	Cytoplasmic	Cell envelope	Biosynthesis and degradation of murein sacculus and peptidoglycan					24.0082	NaN	23.801	NaN	24.2672	NaN	NaN	NaN	NaN	-5876340	-6434525	-6182429	-6497301	-5869144	-5002419	-5713621	-5549972	-4177803	4	2	4	2	3	2	0	2	2
CDIF630erm_01554	CDIF630erm_01554	putative NAD(P)-binding oxidoreductase, GFO/IDH/MOCA family	Cytoplasmic	Energy metabolism	Other					26.8463	27.4533	26.7111	28.1176	27.5882	26.622	NaN	NaN	NaN	-941300	-231481	-2722280	1786788	-959968	-4077647	-5713621	-5848637	-4263762	7	9	8	7	6	3	0	0	3
CDIF630erm_01556	CDIF630erm_01556	putative amino acid amidase	Cytoplasmic	Protein fate	Degradation of proteins, peptides, and glycopeptides					NaN	24.7432	24.9449	NaN	NaN	NaN	NaN	NaN	24.9286	-6266780	-4548885	-3840589	-5992389	-5909241	-6456996	-5713621	-5848637	-2095067	1	2	2	1	1	0	0	0	2
CDIF630erm_01557	CDIF630erm_01557	TsaA-like protein	Cytoplasmic	Unknown function	Unknown function	x		x		27.5003	26.7708	26.8064	27.353	26.2263	26.7295	28.1513	28.53	28.7282	-4717300	-5017936	-5303540	3631613	-3285894	-2533542	-1634656	10973510	1675725	4	3	2	5	4	4	2	2	2
CDIF630erm_01559	CDIF630erm_01559	putative muramoyltetrapeptide carboxypeptidase, S66 family	Cytoplasmic	Cellular processes	Toxin production and resistance					23.5743	22.844	NaN	NaN	24.1446	NaN	NaN	22.8953	25.3413	-6271850	-6290784	-6511718	-6581092	-6248454	-6350540	-4057949	-5226519	-2089216	3	4	2	1	3	1	1	2	3
CDIF630erm_01560	CDIF630erm_01560	hypothetical protein	Unknown	Unknown function	Unknown function		x	x		24.8227	25.2758	25.2066	23.2088	NaN	23.9119	24.2708	NaN	25.9019	-4552000	-4838490	-5166458	-6559204	-6577091	-5880880	-3994275	-4123611	5293236	3	2	3	2	0	2	3	1	4
CDIF630erm_01561	CDIF630erm_01561	putative nicotinamidase	Cytoplasmic	Central intermediary metabolism	Other		x			26.5088	26.7475	26.6565	24.9838	25.0248	NaN	NaN	NaN	NaN	2353300	1138065	29663.7	-6287181	-4829285	-6456996	-5484052	-4932910	-2803174	6	6	6	2	2	0	1	1	1
CDIF630erm_01563	CDIF630erm_01563	putative synthetase	Cytoplasmic	Protein synthesis	Other		x			23.8497	24.2304	23.906	25.0635	24.6388	NaN	NaN	NaN	NaN	-6682876	-6605308	-6682390	-5834765	-6267324	-6375772	-5713621	-5603256	-5845385	4	3	2	4	3	1	0	1	1
CDIF630erm_01564	CDIF630erm_01564	putative oligopeptide transporter	CytoplasmicMembrane	Transport and binding proteins	Amino acids, peptides and amines	x	x	x		29.5079	29.3263	29.4067	29.9237	29.6991	29.9564	29.452	28.5388	26.8418	-1698000	6124466	20556000	29747450	19933350	30100890	1446766	8558891	-443298	5	4	5	5	4	5	3	4	2
CDIF630erm_01565	PqqD	putative coenzyme PQQ synthesis protein D	Cytoplasmic	Unknown function	Unknown function		x			27.8747	27.729	28.0169	25.7681	25.4596	26.8358	NaN	NaN	27.4856	4788200	-196791	1605732	-2253687	-3789596	-2256325	-5713621	565896	26427700	4	4	3	2	2	3	0	1	2
CDIF630erm_01566	CDIF630erm_01566	ABC-type transport system, ATP-binding protein	Cytoplasmic	Transport and binding proteins	Amino acids, peptides and amines	x	x	x		31.1137	30.5237	30.0544	31.9203	31.6861	31.6412	32.2442	32.3332	31.9556	17336200	16597040	4761760	70957740	60499480	41944950	54574300	109569500	51011170	36	34	27	30	29	25	18	28	22
CDIF630erm_01567	CDIF630erm_01567	zinc-binding protein	Unknown	Unknown function	Unknown function					NaN	NaN	24.8644	24.9768	24.2252	26.0415	25.2292	26.0598	NaN	-6699806	-6333851	-5398780	-6157179	-5748142	-4568359	-3417552	1028159	-5486311	1	2	5	4	4	3	3	4	1
CDIF630erm_01569	Ddl	D-alanine-D-alanine ligase	Cytoplasmic	Cell envelope	Biosynthesis and degradation of murein sacculus and peptidoglycan	x		x		28.4567	28.3036	28.0367	28.2296	28.4717	28.3919	29.5691	29.8304	30.0513	6083200	2772021	411402	2456120	53907360	9808697	40979690	33191550	22322560	11	7	6	9	13	9	7	7	6
CDIF630erm_01570	CDIF630erm_01570	putative competence-damage inducible protein, CinA family	Cytoplasmic	DNA metabolism	DNA replication, recombination, and repair	x	x			28.779	28.1214	28.4353	29.1525	29.7434	29.1023	29.209	29.1774	29.2723	11744200	3263206	1852282	20226480	24173360	19445840	4840568	17896660	13250230	12	9	9	11	10	8	4	8	7
CDIF630erm_01571	CDIF630erm_01571	putative hydrolase, HAD superfamily, subfamily IIB	Cytoplasmic	Unknown function	Enzymes of unknown specificity					24.8836	25.2621	24.526	NaN	NaN	NaN	NaN	NaN	NaN	-4908100	-4843380	-5663294	-6043769	-5366598	-5563657	-5713621	-5596267	-4763856	3	3	2	1	2	1	0	1	1
CDIF630erm_01573	CDIF630erm_01573	transcriptional regulator, sigma-54-dependent	Cytoplasmic	Regulatory functions	Small molecule interactions		x			26.8129	26.1427	26.1566	27.6185	27.4775	27.4447	NaN	26.8994	28.0608	-6057870	-4937208	-6134059	-575887	1107827	284091	-5346182	-4361350	7324009	5	6	5	14	12	8	1	4	7
CDIF630erm_01576	CDIF630erm_01576	putative membrane protein	CytoplasmicMembrane	Cell envelope	Other					NaN	NaN	NaN	25.8443	25.5506	NaN	NaN	NaN	NaN	-5036100	-5470656	-6722046	-1382065	-3099563	-4268959	-5713621	-5848637	-5912021	2	2	0	2	2	1	0	0	0
CDIF630erm_01578	CDIF630erm_01578	putative ATP-binding protein	Cytoplasmic	Unknown function	Unknown function	x	x	x		26.4802	26.6258	26.2732	25.3596	25.6221	25.9349	26.7078	26.2138	26.2483	2370000	349526	-2471290	-4989117	-4626479	-3533878	4022951	-2792565	3332361	7	6	7	4	3	4	4	3	4
CDIF630erm_01579	CDIF630erm_01579	putative drug/sodium antiporter, MATE family	CytoplasmicMembrane	Cellular processes	Detoxification					NaN	24.2053	24.1421	NaN	NaN	NaN	NaN	NaN	NaN	-6687069	-6597927	-5463988	-6677498	-6577091	-6456996	-5713621	-5848637	-5753892	1	2	2	0	0	0	0	0	1
CDIF630erm_01581	CDIF630erm_01581	putative diguanylate kinase signaling protein	CytoplasmicMembrane	Signal transduction	Other					25.3606	NaN	NaN	25.8362	25.6519	25.6587	NaN	NaN	25.6101	-6495720	-6758146	-6678595	-4546971	-5114084	-4037140	-4871943	-4677302	-4967008	3	0	2	7	5	5	2	2	3
CDIF630erm_01582	DccA	diguanylate kinase signaling protein	Cytoplasmic	Signal transduction	Other					21.701	23.5743	NaN	NaN	NaN	NaN	NaN	NaN	NaN	-6462630	-6219006	-6513623	-6385779	-6257041	-5759094	-3446746	-5796504	-5125867	2	2	1	1	2	1	1	1	1
CDIF630erm_01583	CDIF630erm_01583	putative diguanylate kinase signaling protein	CytoplasmicMembrane	Signal transduction	Other					27.4474	27.3236	26.7632	28.1195	27.494	26.9157	NaN	27.7547	28.1827	-5559300	-4092198	-5974031	1017080	-2319110	-5079280	-5067359	1004784	-4546033	13	13	10	14	10	5	1	7	3
CDIF630erm_01588	CDIF630erm_01588	putative magnesium transporter	CytoplasmicMembrane	Transport and binding proteins	Cations and iron carrying compounds					28.6025	28.9589	29.0568	28.3228	28.6574	28.8896	28.0225	27.5785	28.6638	-1666800	8342643	8277642	16845570	19968830	31441270	2747100	-1994589	10798570	4	4	3	4	4	4	4	2	2
CDIF630erm_01595	CDIF630erm_01595	putative helicase, DinG family	Cytoplasmic	DNA metabolism	DNA replication, recombination, and repair					26.473	26.6619	26.1725	26.9286	NaN	26.5478	NaN	27.0266	NaN	-6534050	-6303488	-5023407	-5939806	-6099322	498201	-5713621	-5239589	-5854177	6	7	5	8	4	3	0	2	2
CDIF630erm_01599	CDIF630erm_01599	hypothetical protein	CytoplasmicMembrane	Unknown function	Unknown function	x		x		30.3225	30.6004	31.3961	31.7741	31.0638	32.0654	28.6994	29.5056	30.0575	18488200	49130040	70518480	87802830	62051050	162522300	4648636	9636414	10470880	31	34	34	34	30	31	8	10	15
CDIF630erm_01600	CDIF630erm_01600	putative hydrolase	Unknown	Cellular processes	Toxin production and resistance	x		x		32.5296	32.5584	33.7243	32.81	32.5137	33.365	32.0855	31.4123	31.3622	77337200	185796000	279891000	242448500	165175000	400552900	58393310	58222060	58476620	40	41	41	39	38	33	18	19	21
CDIF630erm_01601	CDIF630erm_01601	homeodomain-like protein	Cytoplasmic	Unknown function	Unknown function				x	23.5315	23.7029	24.6725	NaN	NaN	NaN	NaN	NaN	NaN	-6164650	-5881075	-4807657	-5024532	-5122037	-4103218	-5713621	-5848637	-5912021	2	2	2	1	1	1	0	0	0
CDIF630erm_01602	CDIF630erm_01602	putative TPR repeat-containing protein	Cytoplasmic	Unknown function	Unknown function			x		31.0868	31.0646	32.0697	31.4295	31.4133	31.673	30.9613	30.7162	30.4948	47447200	54623060	112947400	101508200	82075020	150704500	58209690	30675910	12076260	26	26	29	28	25	21	11	13	11
CDIF630erm_01604	CDIF630erm_01604	putative transporter, LrgB family	CytoplasmicMembrane	Cell envelope	Biosynthesis and degradation of murein sacculus and peptidoglycan		x			27.3395	27.4211	27.4089	27.0884	26.7576	26.6414	NaN	NaN	NaN	-2395800	2135873	5538852	3189673	-1012705	-4519809	-5713621	-5848637	-4764666	1	3	2	2	3	2	0	0	1
CDIF630erm_01605	CDIF630erm_01605	putative membrane protein	CytoplasmicMembrane	Hypothetical proteins	Domain		x	x		28.4249	29.222	28.4605	27.7527	28.028	27.8946	28.1656	28.8442	28.1316	27051200	37424130	29498890	16281370	17908710	17337650	33230810	9470830	28144310	6	5	5	4	5	4	4	3	5
CDIF630erm_01606	CDIF630erm_01606	putative MORN repeat-containing protein	Unknown	Hypothetical proteins	Domain				x	24.3517	25.6704	24.5549	NaN	NaN	NaN	26.676	NaN	25.5707	-1950200	-3657929	-4747719	-6677498	-6577091	-6456996	3531804	-5076709	-3352413	8	5	6	0	0	0	2	1	3
CDIF630erm_01607	CDIF630erm_01607	putative ca++-chelating serine protease, SCP-like extracellular domain protein	Unknown	Protein fate	Degradation of proteins, peptides, and glycopeptides	x		x		27.9143	28.3586	29.0769	28.5498	28.5576	29.1914	27.9416	27.1223	26.3445	283000	6002288	8507171	6022084	5541281	14498720	537918	-2627611	-3438553	8	9	9	6	5	8	2	3	2
CDIF630erm_01610	PabB	aminodeoxychorismate synthase, component 1	Cytoplasmic	Biosynthesis of cofactors, prosthetic groups, and carriers	Folic acid					26.3791	26.1571	25.6735	25.9315	26.5117	25.9945	NaN	26.8112	26.8265	-4102900	-3105568	-3808017	-3462289	-1241643	-4740757	-5713621	-2384840	-3439363	5	5	7	6	7	5	0	2	2
CDIF630erm_01611	PabC	aminodeoxychorismate lyase	Unknown	Biosynthesis of cofactors, prosthetic	Folic acid				x	24.0923	24.675	24.0425	NaN	NaN	NaN	25.0107	24.8461	24.6202	-4318900	-5012861	-6216531	-6677498	-6577091	-6456996	594504	-4933563	-3139270	5	4	2	0	0	0	3	2	2
CDIF630erm_01612	CDIF630erm_01612	hypothetical protein	Cytoplasmic	Unknown function	Unknown function					25.216	25.3259	25.1196	NaN	NaN	25.4364	NaN	NaN	NaN	-4181400	-4145985	-4213549	-118472	-4122588	-3785288	-3407107	-5848637	5719383	3	4	3	1	1	2	2	0	1
CDIF630erm_01613	FolE	GTP cyclohydrolase 1	Cytoplasmic	Biosynthesis of cofactors, prosthetic groups, and carriers	Folic acid					25.5201	24.9798	26.5708	25.2668	27.0382	NaN	NaN	NaN	NaN	-2622100	-4165913	-4009545	-5458443	-3277752	-5545098	-5713621	-5848637	6013251	6	4	4	5	3	1	0	0	1
CDIF630erm_01614	FolP	dihydropteroate synthase	Cytoplasmic	Biosynthesis of cofactors, prosthetic groups, and carriers	Folic acid					28.6284	28.4793	27.4413	28.2572	28.112	28.6987	29.06	28.6604	29.4421	15763200	9469481	3284408	1598405	10303900	6183744	42300810	6609149	74437950	17	17	15	13	12	9	12	6	14
CDIF630erm_01615	FolB	dihydroneopterin aldolase	Cytoplasmic	Biosynthesis of cofactors, prosthetic groups, and carriers	Folic acid					NaN	NaN	NaN	NaN	24.0078	25.7473	NaN	NaN	NaN	-6619770	-6501626	-6509147	-6280624	-6280664	-3255306	-5713621	-4807121	-5912021	1	1	1	2	2	2	0	1	0
CDIF630erm_01616	FolK	2-amino-4-hydroxy-6- hydroxymethyldihydropteridinepyrophosphokinase	Cytoplasmic	Biosynthesis of cofactors, prosthetic groups, and carriers	Folic acid	x		x		27.124	27.4391	26.874	28.2446	27.1701	27.3228	28.8052	28.4217	29.6264	11604200	10846450	-3739571	12555090	1929735	2389653	9146914	13069710	87553050	7	6	2	8	5	4	3	5	5
CDIF630erm_01617	AroF1	3-deoxy-7-phosphoheptulonate synthase	Cytoplasmic	Amino acid biosynthesis	Aromatic amino acid family	x	x	x		26.8119	26.7664	27.478	25.6945	25.9891	26.1245	27.1086	26.9503	NaN	4765200	-959874	130812	-4306606	-2711561	-4132560	10473810	6007128	1206513	7	5	4	5	4	4	4	4	1
CDIF630erm_01618	DnaG	DNA primase	Cytoplasmic	DNA metabolism	DNA replication, recombination, and repair	x		x		25.1364	25.5717	25.4615	25.1238	25.1888	25.4177	25.634	26.1398	25.882	-5793760	-5055024	-5286270	-5264960	-5931870	-5311364	-5037837	-2839628	-3820194	11	8	9	8	5	4	2	6	6
CDIF630erm_01619	SigA1	RNA polymerase sigma factor SigA1 (sigma-43)	Cytoplasmic	Transcription	Transcription factors					NaN	NaN	NaN	NaN	NaN	NaN	NaN	24.6391	25.1191	-6745800	-3967554	-5024360	-5342505	-4236868	-5620279	-5188266	19351450	-4564215	0	2	1	3	2	2	1	4	2
CDIF630erm_01621	CDIF630erm_01621	GTP cyclohydrolase 1 type 2	Cytoplasmic	Unknown function	Unknown function		x			24.6266	24.4803	NaN	26.458	26.0876	26.2266	26.8748	25.426	26.1276	-5734900	-6333888	-6432764	-4044448	-1197900	-443370	-3264782	-1151415	-2862850	3	2	1	3	6	5	2	3	4
CDIF630erm_01623	CDIF630erm_01623	putative 5-nitroimidazole antibiotic resistance protein	Unknown	Energy metabolism	Electron transport		x			29.4583	28.5494	28.5701	28.4897	26.2675	27.6157	NaN	27.5368	NaN	28687200	9451319	5835490	8070516	50486.8	-1775836	-4539890	6017753	-2958711	9	6	7	7	4	3	1	2	1
CDIF630erm_01631	CDIF630erm_01631	ABC-type transport system, permease protein	CytoplasmicMembrane	Transport and binding proteins	Amino acids, peptides and amines					24.8436	24.5435	25.7066	24.5135	NaN	NaN	NaN	NaN	25.0072	-6679248	-6680686	-5931046	-6462665	-6232548	-6113259	-5126239	-5608592	-5239702	3	2	5	3	2	2	3	2	2
CDIF630erm_01632	CDIF630erm_01632	putative iron-sulfur protein	Cytoplasmic	Energy metabolism	Electron transport	x		x		29.5078	29.5265	29.8711	29.492	29.8352	29.6256	28.3971	28.8578	29.1275	18637200	27081170	18904550	18803140	21436870	25989800	560552	16950240	7033147	14	15	13	14	11	10	3	7	8
CDIF630erm_01635	CDIF630erm_01635	putative membrane protein	CytoplasmicMembrane	Hypothetical proteins	Domain	x		x		33.6426	33.8474	34.2077	33.8207	33.4627	33.5815	32.1028	31.8957	31.9685	49169200	113901300	186401600	172856000	98233770	149149200	17696090	62550470	39489430	56	59	60	53	47	43	17	24	22
CDIF630erm_01636	CDIF630erm_01636	ABC-type transport system, multidrug-family ATP-binding protein/permease	CytoplasmicMembrane	Cellular processes	Toxin production and resistance					25.2969	25.474	25.4345	NaN	NaN	25.6253	NaN	NaN	NaN	-6598370	-6273827	-5648310	-6447961	-6577091	-6181736	-5713621	-4520572	-5690786	4	6	7	2	0	2	0	1	1
CDIF630erm_01637	CDIF630erm_01637	ABC-type transport system, multidrug-family ATP-binding/permease	CytoplasmicMembrane	Cellular processes	Toxin production and resistance					28.7088	28.5241	28.6628	29.9158	NaN	27.1407	NaN	NaN	NaN	-6487290	-6570249	-5817964	18025340	3011026	-5900471	-5681375	-5848637	-5789103	7	5	7	3	3	5	1	0	2
CDIF630erm_01638	Rbr2	reverse rubrerythrin	Cytoplasmic	Cellular processes	Adaptations to atypical conditions	x				32.0992	31.0462	31.0997	31.3576	32.0236	29.905	NaN	28.5753	26.7195	102334200	63528800	45542590	108805700	166010300	54469070	-4952606	5441723	2418438	8	8	7	8	8	4	1	2	2
CDIF630erm_01640	CDIF630erm_01640	putative signaling protein	CytoplasmicMembrane	Signal transduction	Other					25.6579	25.6184	26.4379	26.161	26.0259	26.2686	26.8405	26.0302	NaN	-6404330	-5749559	-5637833	-5867012	-5985980	-5601720	-5319831	-5049147	-4553774	6	7	5	5	6	3	2	2	2
CDIF630erm_01643	FeoB1	ferrous iron transport protein B	CytoplasmicMembrane	Transport and binding proteins	Cations and iron carrying compounds		x			28.8251	27.944	28.4041	26.0709	NaN	26.222	NaN	28.3276	NaN	-198900	-2131024	5332179	-6347032	-6499874	-5764485	-4471093	-1280955	-5680327	8	8	8	3	1	3	1	2	2
CDIF630erm_01647	SsuB1	ABC-type transport system, sulfonates-family ATP-binding protein	CytoplasmicMembrane	Transport and binding proteins	Anions	x		x		27.023	27.4049	27.2905	26.8464	26.4972	27.1739	26.0803	25.5364	26.377	8177200	3877395	3440994	-5001408	831296	2225999	261799	-4845168	224272	11	11	9	5	6	6	4	3	4
CDIF630erm_01648	SsuA1	ABC-type transport system, alkanesulfonates-family extracellular solute-binding protein	CytoplasmicMembrane	Transport and binding proteins	Other			x		29.8842	30.3579	31.4486	31.1832	31.2076	31.6252	31.0261	30.2293	29.9541	51336200	57757560	120732900	37484010	125473000	135006000	194079600	61777300	32971720	13	16	15	14	17	16	8	8	9
CDIF630erm_01654	MetN	ABC-type transport system, methionine-specific ATP-binding protein	CytoplasmicMembrane	Transport and binding proteins	Amino acids, peptides and amines					29.5911	29.9614	30.4746	29.9188	30.119	30.9119	30.4265	30.096	29.6305	37768200	36367460	50916100	52252600	60166840	104308900	58688940	57352460	13515530	14	13	12	6	8	6	6	6	5
CDIF630erm_01655	MetI	ABC-type transport system, methionine-specific permease	CytoplasmicMembrane	Transport and binding proteins	Amino acids, peptides and amines	x		x		31.0244	29.5303	31.3832	30.6013	29.3006	29.5826	28.934	28.6867	29.124	77254200	86378420	126383600	117601700	55180990	73473530	9044134	59704640	13325380	3	3	3	4	4	3	3	4	2
CDIF630erm_01656	MetQ	ABC-type transport system, methionine-specific substrate-binding lipoprotein	CytoplasmicMembrane	Cell envelope	Other	x		x		32.1293	32.7405	32.9009	32.3575	32.4298	32.6551	31.8622	31.2361	32.1177	354134200	435854900	585111400	122634700	346935000	315545200	382189200	90041050	436993200	23	22	23	19	19	16	16	12	18
CDIF630erm_01657	CDIF630erm_01657	two-component sensor histidine kinase, sporulation-associated spo0A	CytoplasmicMembrane	Signal transduction	Two-component systems	x	x			27.2156	27.6237	27.2628	26.6118	26.6707	26.5077	NaN	NaN	27.9099	-6089330	-5409211	-4659146	-4242619	-5240672	-5722564	-5437302	-5296927	-5332493	9	8	9	6	6	4	1	1	2
CDIF630erm_01659	CDIF630erm_01659	transcriptional regulator, HTH-type	Cytoplasmic	Regulatory functions	DNA interactions	x	x			27.9067	27.5896	26.8843	29.0748	28.8696	29.4746	28.2658	29.1497	29.7106	21081200	10782060	3733254	30789270	58420870	49980660	54237090	20454800	119653100	5	5	4	4	5	4	4	4	4
CDIF630erm_01660	ProC1	pyrroline-5-carboxylate reductase	Cytoplasmic	Amino acid biosynthesis	Glutamate family					28.16	27.6326	26.8458	26.456	27.1851	27.0273	27.2399	25.2108	28.3973	24424200	8539117	3306291	-1696110	1839923	1529264	7533622	-5029925	11636580	8	7	7	6	6	8	4	2	5
CDIF630erm_01661	CDIF630erm_01661	uncharacterized protein	Unknown	Hypothetical proteins	Domain	x	x	x		30.2202	30.3537	31.2036	32.3306	31.8939	32.3808	30.5037	30.0466	29.7187	36270200	59030520	83269020	277703700	236965400	437780900	67347820	22092660	45138310	15	15	15	19	17	18	8	7	11
CDIF630erm_01667	DeoC	deoxyribose-phosphate aldolase	Cytoplasmic	Energy metabolism	Other	x		x		26.7144	26.3412	25.9491	24.718	25.6826	25.9529	27.1044	NaN	27.4601	5317200	-1593425	-5199157	-5100747	-4292540	-2981330	15908420	4552177	20710420	6	3	3	2	2	3	3	1	5
CDIF630erm_01669	CDIF630erm_01669	ABC-type transport system, multidrug-family ATP-binding protein	CytoplasmicMembrane	Cellular processes	Toxin production and resistance					26.9322	26.8859	27.7866	26.7589	27.5633	27.7825	27.0186	26.2294	NaN	427600	-1248648	1950026	-1495278	5924921	2260441	8548714	-3883240	-5413502	9	7	11	9	10	8	6	5	1
CDIF630erm_01672	CDIF630erm_01672	putative thioredoxin	CytoplasmicMembrane	Unknown function	Unknown function					26.7664	26.9622	28.6819	28.7661	29.046	27.3487	NaN	NaN	NaN	1206600	-1142826	4792882	13095980	11579740	5401014	-2646407	-5848637	-5793082	7	7	9	12	11	7	1	0	1
CDIF630erm_01674	CDIF630erm_01674	putative lipoprotein	Unknown	Unknown function	Unknown function					27.0586	26.3823	27.5931	26.8173	26.5105	26.1023	NaN	NaN	NaN	-2809900	-4036657	-1407712	-736045	-4790276	-5320644	-5713621	-5528654	-5598508	7	6	7	7	4	3	0	1	1
CDIF630erm_01675	CDIF630erm_01675	LUD-like protein	Unknown	Energy metabolism	Other	x	x	x		26.1473	26.6248	26.1798	25.0714	25.301	NaN	NaN	26.7031	26.7027	-671500	-251593	-3000063	-5760007	-4009066	-5256834	1371009	33018.8	13221670	8	8	7	2	2	1	1	2	5
CDIF630erm_01679	PanB	ketopantoate hydroxymethyltransferase	Cytoplasmic	Biosynthesis of cofactors, prosthetic groups, and carriers	Pantothenate and coenzyme A					NaN	24.2912	NaN	NaN	NaN	NaN	25.1565	24.8002	24.4664	-6309570	-5667908	-6722046	-6542687	-5878574	-6265552	2253758	-4733055	-3157722	1	3	0	1	1	1	3	2	2
CDIF630erm_01681	PdcA	diguanylate kinase signaling protein	CytoplasmicMembrane	Signal transduction	Other					25.9837	25.8341	25.5456	25.7456	25.157	25.4924	NaN	NaN	NaN	-6276610	-5831947	-6283021	-5625950	-5831310	-6032805	-5713621	-5467682	-5673441	5	6	6	5	5	3	0	2	2
CDIF630erm_01685	FeoA3	ferrous iron transport protein A	Unknown	Transport and binding proteins	Cations and iron carrying compounds					NaN	NaN	NaN	NaN	26.3057	24.2926	NaN	NaN	NaN	-6745800	-6758146	-6722046	-6468069	562747	-5643111	-4966083	-5848637	-5912021	0	0	0	1	2	2	1	0	0
CDIF630erm_01686	CDIF630erm_01686	putative acyltransferase	Cytoplasmic	Central intermediary metabolism	Other					27.8288	27.1124	27.2308	28.2573	26.8044	28.6473	28.5928	NaN	NaN	351300	-4012946	-4829689	5418401	-1384421	6574012	543115	328063	-4014525	5	5	4	4	4	4	2	1	1
CDIF630erm_01689	TyrS	tyrosine-tRNA ligase	Cytoplasmic	Protein synthesis	tRNA aminoacylation	x		x		29.0579	28.7193	28.728	28.3687	28.7404	28.7212	29.4168	30.0648	29.8608	12901200	21598880	11722530	8388294	10503480	13167550	13694620	34819600	32718430	17	18	17	18	13	13	6	11	15
CDIF630erm_01690	PgdA1	putative peptidoglycan-N-acetylglucosamine deacetylase	Extracellular	Energy metabolism	Sugars					31.3251	31.9846	32.4366	31.5867	31.7827	31.558	31.3612	31.5846	31.3712	117394200	171935500	234247700	112573300	123558500	73741170	140992200	94434830	91280890	25	26	25	26	24	19	14	16	18
CDIF630erm_01692	Rbr3	reverse rubrerythrin	Cytoplasmic	Cellular processes	Adaptations to atypical conditions	x		x		31.6695	31.0158	31.1002	31.2596	31.8369	29.807	25.8778	27.5808	NaN	95694200	65805580	33427630	104800200	154841100	57689500	-3929719	1202243	-3196696	7	7	7	7	6	4	1	2	1
CDIF630erm_01693	CDIF630erm_01693	putative iron-sulfur protein	Cytoplasmic	Unknown function	Unknown function					25.9104	25.0966	25.676	25.074	25.2855	25.2699	NaN	NaN	25.8712	-3890100	-5420098	-4993121	-5325336	-4543349	-4703137	-4677030	-5540117	-1479670	6	4	5	5	4	3	2	1	4
CDIF630erm_01694	PyrC	dihydroorotase	Cytoplasmic	Purines, pyrimidines, nucleosides, and nucleotides	Pyrimidine ribonucleotide biosynthesis	x		x		26.6396	26.2918	25.733	26.3129	26.6629	26.7459	27.0214	27.8566	27.7875	-3158500	-1319227	-3168321	-1141763	-4766985	-2854064	-2784201	7379205	2943042	8	6	7	8	5	3	4	5	4
CDIF630erm_01695	CDIF630erm_01695	ABC-type transport system, permease	CytoplasmicMembrane	Transport and binding proteins	Amino acids, peptides and amines	x	x	x		32.2113	32.3147	32.7361	32.0033	31.9381	32.1696	31.6488	31.0778	31.3404	90545200	119812100	232618700	161182000	120461300	173548000	135472200	121064000	90311340	15	14	16	15	12	12	5	8	6
CDIF630erm_01696	CDIF630erm_01696	ABC-type transport system, ATP-binding protein	CytoplasmicMembrane	Transport and binding proteins	Amino acids, peptides and amines					28.9749	29.5196	29.5318	29.0654	28.8642	29.2554	28.7842	27.9543	29.8914	39853200	38220760	36004970	18043890	37824020	37087980	46801160	5462972	124666100	9	10	9	10	8	7	6	2	7
CDIF630erm_01697	CDIF630erm_01697	ABC-type transport system, permease	Unknown	Transport and binding proteins	Unknown substrate	x	x	x		33.4119	33.6799	34.4252	34.6674	34.7653	34.8053	33.1095	33.2593	33.2408	367844200	818831000	939082400	629495400	651423000	962306600	303441600	401308400	391500000	28	31	31	29	29	27	17	19	22
CDIF630erm_01698	CDIF630erm_01698	two-component sensor histidine kinase	CytoplasmicMembrane	Signal transduction	Two-component systems		x			NaN	22.9879	23.4278	24.6221	NaN	25.1113	NaN	NaN	NaN	-6627090	-6645589	-6292888	-6097006	-6304145	-5340293	-5713621	-5848637	-5912021	1	2	2	3	2	3	0	0	0
CDIF630erm_01702	CDIF630erm_01702	cephalosporin acylase	Extracellular	Biosynthesis of cofactors, prosthetic groups, and carriers	Glutathione and analogs					NaN	NaN	NaN	26.5951	26.384	NaN	NaN	NaN	NaN	-6330120	-5641706	-6258284	-3736041	-4467983	-6340424	-3191166	-4560692	-5674215	3	1	2	5	5	2	1	2	1
CDIF630erm_01703	SseA1	3-mercaptopyruvate sulfurtransferase	Cytoplasmic	Central intermediary metabolism	Sulfur metabolism	x	x	x		28.2283	27.736	27.9237	25.1982	26.4537	NaN	27.3587	26.9775	27.2185	12069200	6088143	2405194	-5764949	-329773	-6456996	13478670	1629035	-2093267	10	9	9	3	5	0	6	2	2
CDIF630erm_01704	NfnA	NADH-dependent reduced ferredoxin:NADP+ oxidoreductase, subunit alpha	Cytoplasmic	Energy metabolism	Electron transport	x	x	x		30.4883	30.697	30.6978	27.6995	27.9802	27.7136	30.6128	28.7954	29.361	92795200	88186300	82578500	257838	7831298	-1130961	142886100	13795470	43245830	19	20	19	9	9	6	7	5	10
CDIF630erm_01705	NfnB	NADH-dependent reduced ferredoxin:NADP+ oxidoreductase, subunit beta	Cytoplasmic	Amino acid biosynthesis	Glutamate family	x		x		31.418	31.0462	30.654	30.9917	31.0669	30.8989	31.7181	32.0096	32.2387	57286200	72665670	41448510	72204120	67447890	73681940	108006900	156555900	146401900	18	20	18	18	19	18	16	15	16
CDIF630erm_01706	CDIF630erm_01706	putative signaling protein	CytoplasmicMembrane	Signal transduction	Other					25.0883	25.4544	26.5726	26.3232	25.5881	26.3957	25.6627	25.7732	NaN	-6535400	-6005221	-5513767	-4926207	-5805414	-5578800	-5216378	-4369831	-5444051	3	5	8	7	6	7	2	4	2
CDIF630erm_01709	CDIF630erm_01709	putative drug/sodium antiporter, MATE family	CytoplasmicMembrane	Transport and binding proteins	Other		x			30.2451	30.4475	30.2395	30.6976	30.4944	31.1819	30.8527	29.7261	30.21	24709200	51887280	90680100	37039700	22360860	53712220	70480870	46315690	26675720	5	5	5	3	3	7	3	3	2
CDIF630erm_01710	CDIF630erm_01710	fic family protein	Cytoplasmic	Unknown function	Unknown function					24.4073	26.4877	NaN	26.3603	26.1459	25.5228	25.757	26.097	25.889	-5909890	-5707027	-6277656	-2678222	-2216476	-3983434	-195681	-498123	-4577356	5	3	2	3	4	4	2	5	2
CDIF630erm_01714	CDIF630erm_01714	putative channel-forming hemolysin	CytoplasmicMembrane	Cellular processes	Pathogenesis					NaN	27.3628	26.5921	NaN	NaN	NaN	NaN	NaN	NaN	-6684354	-897691	-250164	-6592249	-6321708	-4523432	-5713621	-5848637	-5426445	1	2	2	1	1	1	0	0	1
CDIF630erm_01717	HisG	ATP phosphoribosyltransferase, catalytic subunit	Cytoplasmic	Amino acid biosynthesis	Histidine family					25.8376	25.9062	25.3443	25.9356	25.897	26.4594	26.2182	25.7609	26.9392	-2736100	-3104738	-942369	-4100896	-1947014	-2918581	4942308	-3587069	5521717	7	7	4	5	5	4	3	3	5
CDIF630erm_01718	HisC1	histidinol-phosphate aminotransferase	Cytoplasmic	Amino acid biosynthesis	Histidine family	x	x			26.4367	26.5916	25.9862	27.1622	28.0481	27.269	28.4347	28.1715	27.7603	-1477400	-2818639	-3286418	1749206	14263010	6240124	14964930	24237250	-2122070	7	4	5	8	8	6	3	4	3
CDIF630erm_01720	HisH	imidazole glycerol phosphate synthase subunit HisH	Cytoplasmic	Amino acid biosynthesis	Histidine family					25.2763	25.5192	24.6256	NaN	NaN	NaN	26.9614	26.5195	27.1268	-4158200	-12086.1	-3937226	-6567009	-6577091	-6456996	-1225174	-2992234	15770280	4	6	6	1	0	0	2	3	3
CDIF630erm_01721	HisA	1-(5-phosphoribosyl)-5-[(5- phosphoribosylamino)methylideneamino] imidazole-4-carboxamide isomerase	Cytoplasmic	Amino acid biosynthesis	Histidine family	x		x		26.114	26.529	26.2298	25.9094	26.4303	25.7878	26.5449	26.9743	26.9495	-1357400	-273644	-2732629	-4602786	-1731237	-4177162	69867	-2578218	8595684	9	8	7	6	5	6	4	2	6
CDIF630erm_01722	HisF	imidazole glycerol phosphate synthase subunit HisF	Cytoplasmic	Amino acid biosynthesis	Histidine family					28.1593	27.6169	27.0853	27.5526	27.4624	27.6728	27.5997	26.4631	27.2455	11209200	3959947	948753	708341	5358700	181204	7117885	-176137	7445765	14	12	10	9	9	6	6	5	7
CDIF630erm_01723	HisI	bifunctional phosphoribosyl-AMP cyclohydrolase/phosphoribosyl-ATP pyrophosphatase	Cytoplasmic	Amino acid biosynthesis	Histidine family	x	x	x		28.7448	28.7273	28.1332	26.7124	26.852	27.1545	27.7087	27.8832	27.9754	27416200	21720230	8723570	-253416	5233777	-235678	16109360	178824	19855870	12	12	11	8	7	4	6	2	6
CDIF630erm_01724	SteT1	serine/threonine exchanger	CytoplasmicMembrane	Transport and binding proteins	Amino acids, peptides and amines	x		x		29.2706	29.47	29.2177	29.0269	29.4377	30.0679	28.3736	28.7516	28.6393	7235200	17857610	34290800	18271760	21082800	28394150	7823484	5732190	4882873	3	4	4	3	4	2	3	2	2
CDIF630erm_01725	CDIF630erm_01725	putative polysaccharide deacetylase	Unknown	Energy metabolism	Sugars		x			28.2475	29.099	29.6314	27.4339	27.4387	26.5558	27.2938	NaN	26.9777	7253200	16187580	25594460	0	1636572	-1537212	1865275	-5381291	1069425	12	14	14	7	6	7	3	1	4
CDIF630erm_01726	CDIF630erm_01726	putative peptidyl-prolyl isomerase	CytoplasmicMembrane	Protein fate	Protein folding and stabilization		x			28.2965	29.1331	29.5534	26.9006	25.7667	NaN	NaN	NaN	NaN	-1931600	2211491	19318870	-5409850	-5965936	-4838240	-4020197	-5608918	-5556491	8	14	15	3	2	1	1	1	1
CDIF630erm_01727	CsfV	extracytoplasmic function (ECF) sigma factor	Cytoplasmic	Transcription	DNA-dependent RNA polymerase				x	24.4323	23.9542	25.9466	25.6145	NaN	NaN	NaN	NaN	NaN	-5491900	-6195996	-4320536	-2762862	-6243852	-6193737	-5713621	-5848637	-5912021	3	3	3	4	1	1	0	0	0
CDIF630erm_01728	RsiV	extracytoplasmic function (ECF) anti-sigma factor	Unknown	Unknown function	Unknown function					25.7972	25.7436	NaN	NaN	NaN	NaN	NaN	NaN	NaN	-5403000	-5794397	-5372431	-6176039	-6577091	-4822125	-5713621	-5848637	-5912021	3	3	1	1	0	1	0	0	0
CDIF630erm_01730	CDIF630erm_01730	putative xanthine dehydrogenase accessory factor	Cytoplasmic	Purines, pyrimidines, nucleosides, and nucleotides	Other					24.1275	23.8169	23.7765	NaN	NaN	NaN	NaN	NaN	NaN	-5035600	-6009464	-6351067	-6677498	-6184866	-6283893	-5409895	-5033956	-5597752	3	2	2	0	1	1	1	1	1
CDIF630erm_01734	IlvC	ketol-acid reductoisomerase	Cytoplasmic	Amino acid biosynthesis	Pyruvate family					24.6305	23.3835	NaN	24.27	23.5984	NaN	24.5209	NaN	NaN	-5877840	-6498222	-6613022	-6324541	-5803956	-6179606	-4449059	322046900	-5912021	3	3	2	2	4	1	3	3	0
CDIF630erm_01739	CDIF630erm_01739	hydrolase, alpha/beta domain protein (N-terminal domain)	Cytoplasmic	Hypothetical proteins	Domain					25.1157	23.8028	23.7076	25.0323	26.7934	26.1815	26.8292	NaN	NaN	-3812300	-5791537	-5509449	-1019110	1568936	822656	4678200	-5848637	-5912021	5	4	3	3	3	2	2	0	0
CDIF630erm_01741	CDIF630erm_01741	hydrolase, alpha/beta domain protein (C-terminal domain)	Cytoplasmic	Hypothetical proteins	Domain					26.3851	NaN	25.7219	NaN	NaN	NaN	NaN	NaN	NaN	2101600	-5555997	1915986	6461170	-2781246	-5418332	33870580	-5848637	-5446121	2	1	2	1	1	1	1	0	1
CDIF630erm_01743	CDIF630erm_01743	putative N-acetyltransferase	Cytoplasmic	Unknown function	Unknown function					25.3885	NaN	22.7064	26.9623	26.0534	25.1716	NaN	NaN	NaN	-5796950	-6670043	-6681633	-124174	-3311742	-4037611	-5713621	-5848637	-4659535	3	1	2	5	4	2	0	0	1
CDIF630erm_01746	PgcA1	phosphoglucomutase	Cytoplasmic	Energy metabolism	Sugars					24.3506	23.9725	24.2939	NaN	23.8188	NaN	NaN	NaN	NaN	-6264460	-6024614	-6041143	-6640729	-6441612	-6220440	-5713621	-5848637	-5876165	5	3	3	1	2	1	0	0	1
CDIF630erm_01748	CDIF630erm_01748	two-component sensor histidine kinase, sporulation-associated spo0A	CytoplasmicMembrane	Regulatory functions	Small molecule interactions	x	x			28.6994	28.5621	28.7366	30.1665	29.9436	29.9131	29.8317	29.984	29.8425	-2610500	2790182	1505556	27544890	18580630	28642050	2453543	14058640	10529500	17	17	19	23	22	15	5	8	12
CDIF630erm_01751	Hom2	homoserine dehydrogenase	Cytoplasmic	Amino acid biosynthesis	Aspartate family	x	x	x		31.9564	31.2909	30.292	29.5068	29.7168	29.1073	30.5229	31.1704	30.6378	218584200	139187100	34169710	15912690	11924210	6720774	76260780	103660500	48746650	21	22	18	13	11	7	6	6	7
CDIF630erm_01752	CDIF630erm_01752	uncharacterized protein	Cytoplasmic	Unknown function	Unknown function					28.1004	NaN	26.1475	NaN	NaN	NaN	NaN	NaN	NaN	-3132000	-3876401	183818	-6504878	-6577091	-6456996	-5713621	-796578	-5912021	2	1	2	1	0	0	0	1	0
CDIF630erm_01753	HisD	histidinol dehydrogenase (HDH)	Unknown	Amino acid biosynthesis	Histidine family					28.9704	28.1549	27.8854	28.4736	28.5964	28.0157	27.6986	26.4081	28.7018	13552200	12365410	5023384	17321760	15042120	14207830	9792461	1484701	10588880	7	7	7	8	7	7	5	4	4
CDIF630erm_01754	CDIF630erm_01754	alpha/beta hydrolase	Cytoplasmic	Unknown function	Unknown function					23.4989	23.3872	NaN	NaN	NaN	NaN	25.1474	NaN	25.4002	-5867790	-6198339	-6459704	-6677498	-6577091	-6456996	-789014	-5848637	32167.7	3	2	1	0	0	0	2	0	2
CDIF630erm_01761	RbsB2	ABC-type transport system, ribose-specific extracellular solute-binding protein	Unknown	Transport and binding proteins	Carbohydrates, organic alcohols, and acids					24.3621	24.7972	26.1628	25.4994	25.3736	25.6374	NaN	NaN	NaN	-6039620	-5021626	-2590848	-6332999	-3758919	-3918976	-2558948	-5398928	-5748149	3	4	5	3	3	3	1	1	1
CDIF630erm_01767	CysK	cysteine synthase	Unknown	Amino acid biosynthesis	Serine family	x	x	x		34.118	34.2442	33.9828	32.3535	31.413	32.5371	34.7659	35.2912	35.2878	985254200	1051529000	652316800	157961400	123588100	293739200	2861150000	2704253000	1804420000	28	39	26	24	21	20	27	27	28
CDIF630erm_01768	CysE	serine O-acetyltransferase	Cytoplasmic	Amino acid biosynthesis	Serine family		x			30.5259	30.7889	31.631	32.2424	31.7117	31.8541	29.7454	31.1612	31.8609	93774200	80541970	92844100	114276400	82052850	132026900	25861860	87533580	385960800	15	13	14	13	12	12	6	8	12
CDIF630erm_01774	ThiD	bifunctional hydroxymethylpyrimidine/phosphomethylpyrimidine kinase	Unknown	Biosynthesis of cofactors, prosthetic groups, and carriers	Thiamine					26.0735	25.6505	25.4621	24.7446	NaN	25.5913	NaN	NaN	25.2026	-1242300	-2895584	-4193803	-6518626	-6577091	-4083981	-2057603	-5848637	-577773	6	5	4	2	0	2	1	0	2
CDIF630erm_01777	CDIF630erm_01777	PTS system, lactose/cellobiose-family IIB component	Cytoplasmic	Signal transduction	PTS		x			29.2063	29.3161	28.6242	28.3388	27.75	26.9631	NaN	28.8564	NaN	22647200	16312230	7495200	1460447	-2088562	798306	-4135592	3171600	-3679329	3	3	3	3	2	2	1	2	1
CDIF630erm_01783	CDIF630erm_01783	ABC-type transport system, multidrug-family ATP-binding protein	CytoplasmicMembrane	Cellular processes	Toxin production and resistance					25.4374	25.9065	25.439	25.323	25.3257	25.8462	NaN	NaN	NaN	-2367000	-1633096	-2994349	-4424634	719160	-1401107	834939	-5323627	-5828717	3	3	2	3	3	3	1	1	1
CDIF630erm_01787	CDIF630erm_01787	hypothetical protein	Unknown	Unknown function	Unknown function		x			NaN	24.5935	25.1892	25.5828	25.8806	25.5192	NaN	NaN	NaN	-6697080	-6116080	-6123964	-5140153	-5058223	-3350756	-5713621	-5742912	-2788952	1	3	3	4	3	3	0	1	1
CDIF630erm_01788	CDIF630erm_01788	putative amidohydrolase	Cytoplasmic	Central intermediary metabolism	Nitrogen metabolism					NaN	NaN	NaN	24.3512	24.0741	NaN	NaN	NaN	NaN	-6176560	-6566928	-6588564	-5974207	-6074989	-6456996	-4478883	-5848637	-5804387	1	1	1	4	4	0	2	0	1
CDIF630erm_01789	CotA	spore coat assembly protein	Unknown	Unknown function	Unknown function					23.2614	22.6458	NaN	NaN	NaN	NaN	25.4975	NaN	24.3526	-5273400	-5550000	-6529103	-6512822	-6149475	-5853394	4248951	-5574459	-3086795	4	4	1	3	1	2	3	1	2
CDIF630erm_01790	CDIF630erm_01790	ABC-type transport system, ATP-binding protein	CytoplasmicMembrane	Transport and binding proteins	Cations and iron carrying compounds	x	x			30.2908	30.7495	30.9985	29.5324	29.7945	29.7884	29.9792	28.8502	29.5932	81864200	80195260	80686830	19512430	42633940	29881510	96174590	8226251	55513890	17	17	16	12	12	11	9	6	10
CDIF630erm_01791	CDIF630erm_01791	ABC-type transport system, permease	CytoplasmicMembrane	Transport and binding proteins	Cations and iron carrying compounds	x		x		31.3081	31.5735	31.6205	31.408	31.1593	31.47	29.4377	29.0939	29.4779	19061200	45796580	72896450	60168510	35851860	49094380	-1956554	14952760	2744624	17	17	18	15	14	13	5	7	7
CDIF630erm_01792	CDIF630erm_01792	putative diguanylate kinase signaling protein	CytoplasmicMembrane	Signal transduction	Other	x		x		27.829	28.0115	28.6106	28.5068	28.1488	28.3471	26.446	26.7459	27.0723	-1784000	-1337310	990088	1943774	-428809	1835730	-3049471	-3709060	-892627	11	12	13	13	11	10	2	2	4
CDIF630erm_01793	CDIF630erm_01793	transcriptional regulator, GntR family	Cytoplasmic	Regulatory functions	DNA interactions		x		x	27.4524	27.6441	28.909	25.3445	NaN	26.9566	NaN	NaN	NaN	-1901800	-1374584	18906010	-5981936	-6318442	-5358087	-5713621	-5848637	-5912021	6	7	8	3	1	2	0	0	0
CDIF630erm_01794	CDIF630erm_01794	ABC-type transport system, multidrug-family ATP-binding protein	CytoplasmicMembrane	Cellular processes	Toxin production and resistance					31.321	31.796	31.7686	30.5851	30.8889	31.3895	30.9074	30.8987	30.7749	157794200	157133900	163108200	61072370	143095300	145571100	249303300	36893900	178945300	17	16	15	14	14	13	16	7	14
CDIF630erm_01797	CDIF630erm_01797	putative mechanosensitive ion channel protein, MscS family	CytoplasmicMembrane	Signal transduction	Other					27.7687	28.0877	28.6132	28.2765	28.2443	28.3748	28.1305	28.1416	28.5398	6059200	8537466	14031430	12717310	11643310	11617230	12545570	1457730	636138	6	7	7	7	7	7	5	2	2
CDIF630erm_01799	CDIF630erm_01799	peptidase propeptide and ypeb domain protein	Unknown	Hypothetical proteins	Domain					24.1942	24.8059	25.3424	NaN	24.4256	25.1949	NaN	NaN	NaN	-5027000	-4777137	-2742661	-6527476	-4771624	-4778790	-5713621	-4613231	-5912021	4	5	6	3	5	3	0	2	0
CDIF630erm_01800	FprAnorR	NADH oxidase (H2O-forming)	Cytoplasmic	Energy metabolism	Electron transport	x	x			29.5319	29.0889	29.2588	26.8882	27.4533	24.8628	26.0469	27.0203	27.2208	-311700	-354556	-1833372	-3630050	-3936351	-6305425	-4580385	-3147635	-4831904	27	23	27	13	10	3	3	6	5
CDIF630erm_01801	VanR	two-component response regulator	Cytoplasmic	Signal transduction	Two-component systems					25.3445	25.2187	NaN	NaN	NaN	NaN	25.8761	NaN	NaN	-1326600	-4469726	-5961142	-6670406	-6577091	-6408187	1473211	-5848637	-5912021	7	6	1	2	0	1	2	0	0
CDIF630erm_01802	VanS	two-component sensor histidine kinase	Cytoplasmic	Signal transduction	Two-component systems					25.8446	25.4825	26.4659	26.7585	26.3466	26.8949	25.5516	NaN	NaN	-4343200	-5281615	-4179263	-4050593	-3015486	-2661692	-5024335	-5732813	-5912021	9	8	9	8	8	6	2	1	0
CDIF630erm_01811	TerD1	tellurium resistance protein terD	Cytoplasmic	Cellular processes	Toxin production and resistance	x	x	x		28.9292	29.0857	29.6937	26.1368	26.4474	26.6763	29.0069	29.8887	30.0866	58844200	35083780	22190910	962373	-3381048	-1728700	15746740	26282120	103960100	8	6	7	6	5	3	3	4	5
CDIF630erm_01812	TerD2	tellurium resistance protein terD	Cytoplasmic	Cellular processes	Toxin production and resistance			x		27.4919	27.8078	28.116	26.7534	28.1669	27.3469	28.4673	28.5624	28.3885	17055200	16413770	9811403	-1667157	3844095	5544046	46124440	10372470	46644480	4	4	4	3	2	4	3	2	4
CDIF630erm_01813	TerD3	tellurium resistance protein terD	Cytoplasmic	Cellular processes	Toxin production and resistance	x	x			30.2557	30.3356	30.4	29.6427	29.028	29.6565	29.2471	28.3	28.4194	60620200	39696800	48888270	24597830	22525700	20018410	27296160	1894983	20230160	15	14	12	14	11	7	7	4	7
CDIF630erm_01814	CDIF630erm_01814	putative calcium-transporting ATPase	CytoplasmicMembrane	Transport and binding proteins	Cations and iron carrying compounds	x	x			36.697	36.5635	36.8369	35.6601	35.4465	35.7549	35.7692	35.556	35.7636	377714200	628606100	1049227000	402935900	292264300	487776400	472623600	655275000	490408100	46	48	50	44	41	41	29	37	31
CDIF630erm_01815	CDIF630erm_01815	hypothetical protein	CytoplasmicMembrane	Unknown function	Unknown function		x			25.9421	26.5922	27.2924	25.7195	25.3504	25.3	NaN	25.9719	26.5686	-5909110	-3179099	-513979	-3756251	-5157543	-5159764	-5130568	-3325636	-2834857	2	5	7	5	5	2	1	2	3
CDIF630erm_01816	CDIF630erm_01816	putative tellurite associated resistance protein	Cytoplasmic	Cellular processes	Toxin production and resistance	x	x			33.21	32.9357	33.5789	34.852	34.6748	34.9681	34.5733	34.9029	34.6693	308894200	265269100	276559900	888475100	737309800	1170318000	733163800	1138510000	803313900	37	39	36	40	40	37	22	30	32
CDIF630erm_01818	CDIF630erm_01818	TRSP domain protein	Cytoplasmic	Unknown function	Unknown function					23.933	24.2953	NaN	NaN	23.3242	NaN	NaN	NaN	NaN	-5956150	-5823090	-6537598	-6360824	-6314551	-6456996	-5472688	-5848637	-5073319	4	2	1	1	2	0	1	0	2
CDIF630erm_01819	StiP	cysteine protease	Cytoplasmic	Unknown function	Unknown function	x	x			28.9562	28.4933	28.9369	29.1602	29.5431	29.106	29.3922	29.6593	29.2593	9624200	4347117	7197104	14859930	18088330	15270920	23466750	32500120	13566640	16	16	13	12	13	12	10	8	8
CDIF630erm_01820	CDIF630erm_01820	putative hydrolase	Cytoplasmic	Unknown function	Unknown function					26.0593	25.9326	25.9591	26.1535	25.6972	25.0813	26.1304	NaN	24.849	-898400	-1697217	-293974	-5052661	-3300664	-3876407	2726429	-5848637	-1462479	9	9	10	4	4	4	5	0	3
CDIF630erm_01821	CDIF630erm_01821	transcriptional regulator, RmlC-type	Cytoplasmic	Regulatory functions	DNA interactions	x	x			25.1632	25.3142	26.1643	26.5497	27.079	26.2673	26.2638	26.46	26.4193	-5293600	-4902980	-4854007	94667.4	-1908858	-4189565	-2155632	-2903466	7602845	4	5	3	7	5	4	2	2	5
CDIF630erm_01823	CDIF630erm_01823	membrane dipeptidase	Cytoplasmic	Protein fate	Degradation of proteins, peptides, and glycopeptides		x	x		27.3921	25.8713	25.7826	24.9326	25.0488	25.2499	25.9615	26.9255	26.9653	1575000	-1724065	-220322	-6386248	-5706965	-5178353	-4562277	3470240	-1925759	9	8	7	2	2	2	2	3	2
CDIF630erm_01827	YclQ	putative ABC transporter solute-binding protein YclQ	CytoplasmicMembrane	Transport and binding proteins	Cations and iron carrying compounds				x	NaN	25.6882	26.0912	24.4237	25.7657	25.5497	NaN	NaN	NaN	-6251990	-4508106	-5164363	-5717560	-5544976	-5986995	-5713621	-5848637	-5912021	1	2	2	3	3	2	0	0	0
CDIF630erm_01829	CDIF630erm_01829	putative tellurium resistance protein	Cytoplasmic	Cellular processes	Toxin production and resistance	x	x			26.2099	26.2636	27.0352	25.0901	25.3018	25.4838	26.3211	NaN	NaN	1000000	-607164	1156400	-5857509	-5226849	-3969795	2422825	256794	631403	7	6	6	2	2	2	2	1	1
CDIF630erm_01830	CDIF630erm_01830	putative D-methionine-binding lipoprotein	CytoplasmicMembrane	Transport and binding proteins	Amino acids, peptides and amines					30.4641	31.2293	31.2581	31.0214	30.5879	31.0668	30.9166	30.9923	31.3803	82584200	141399500	151797100	42366760	44072410	52431080	203687700	59124360	281739100	13	15	15	9	8	7	11	6	14
CDIF630erm_01832	LplA	lipoate-protein ligase	Cytoplasmic	Protein fate	Protein modification and repair	x	x	x		29.0712	28.6759	28.5457	29.3166	29.4215	29.1575	29.5515	30.2716	30.1664	9590200	4778039	4263312	16057310	24670100	18239280	39524610	28121040	13498250	19	17	16	16	15	13	12	10	10
CDIF630erm_01834	CDIF630erm_01834	putative na+/h+ antiporter NhaC-like protein	CytoplasmicMembrane	Transport and binding proteins	Cations and iron carrying compounds	x	x	x		28.6264	29.3523	29.8165	30.9062	30.8009	30.8358	28.6197	29.6236	29.6637	4996200	18158100	31291350	62171280	40557560	64904740	8432077	24117920	38307190	6	7	7	6	5	6	4	4	4
CDIF630erm_01838	GcvTPA	glycine cleavage system, subunit A	Cytoplasmic	Energy metabolism	Amino acids and amines		x			26.4404	26.455	26.1435	27.1448	27.2981	27.1118	27.2282	27.3388	26.3736	-6222350	-5688390	-6439050	-2957422	-3255786	-5741271	-4162396	-654922	-4955577	10	11	6	12	10	6	2	7	4
CDIF630erm_01840	CDIF630erm_01840	cation-transporting ATPase	CytoplasmicMembrane	Transport and binding proteins	Cations and iron carrying compounds					25.447	24.9419	25.318	25.1521	25.3682	25.1199	NaN	NaN	24.5161	-6625410	-6466475	-6164085	-6212303	-6221782	-6080588	-4548246	-5848637	-5682730	4	5	4	2	2	2	2	0	2
CDIF630erm_01843	CDIF630erm_01843	hypothetical protein	Cytoplasmic	Mobile and extrachromosomal element functions	Transposon functions					25.128	27.284	24.4163	NaN	NaN	NaN	NaN	NaN	NaN	-6119870	1636598	-6107684	2815285	-3359177	2151192	-3343432	-5707342	-5912021	2	2	3	1	1	1	2	1	0
CDIF630erm_01844	GuaD	guanine deaminase	Unknown	Unknown function	Unknown function					28.0378	27.9415	27.9682	28.3054	28.5595	27.5376	NaN	27.3458	27.1334	-2379800	791676	848091	3252468	4049591	-2455473	-5498624	-1680525	-4234239	8	10	10	10	9	5	1	3	3
CDIF630erm_01859	CDIF630erm_01859	putative NADPH-dependent FMN reductase	Unknown	Energy metabolism	Electron transport	x	x			28.3705	28.2795	27.73	25.9731	26.7643	25.9913	26.3526	26.1349	25.8758	28537200	12565190	4030864	-3056444	-1048305	-2264279	-2418008	-3660320	-900458	8	8	6	6	4	4	2	2	3
CDIF630erm_01861	Pcp	pyrrolidone-carboxylate peptidase	Cytoplasmic	Protein fate	Degradation of proteins, peptides, and glycopeptides	x	x	x		25.6524	26.0732	24.9213	27.2503	26.6819	26.916	28.4797	29.1423	29.4486	-4238100	-4221270	-5930157	-1457392	937813	-245695	29891050	8420441	97909830	4	4	4	4	5	6	3	3	7
CDIF630erm_01864	CDIF630erm_01864	putative flavodoxin	Unknown	Energy metabolism	Electron transport	x	x			28.3387	28.1287	28.1368	29.9345	28.417	30.5209	30.4237	31.0465	31.2829	3703200	-873058	-1051832	23253460	12979030	16297370	13791620	84574970	34259180	6	5	4	6	4	5	2	3	3
CDIF630erm_01865	CDIF630erm_01865	putative FMN-binding protein	CytoplasmicMembrane	Unknown function	Unknown function					26.6317	26.9445	27.7513	27.4252	27.1661	26.767	27.7138	NaN	NaN	-1515100	-3853336	-428771	516627	-2858316	-2970725	-4117597	-5848637	-5912021	8	7	6	7	7	5	2	0	0
CDIF630erm_01867	IunH	inosine/uridine-preferring nucleoside hydrolase	Cytoplasmic	Purines, pyrimidines, nucleosides, and nucleotides	Other	x		x		29.1548	28.7774	29.2423	28.9778	29.1935	29.4263	30.4172	29.7562	29.4426	36756200	20847650	24985620	25961700	29703260	22102470	121429500	40566830	29385920	13	14	14	12	10	8	8	7	7
CDIF630erm_01868	CDIF630erm_01868	putative membrane protein	CytoplasmicMembrane	Cell envelope	Other					NaN	29.0094	30.1678	NaN	NaN	NaN	NaN	NaN	NaN	24612200	14897290	81280100	26039250	16065900	39384840	25790260	42126230	49623750	1	2	2	1	1	1	1	1	1
CDIF630erm_01869	CDIF630erm_01869	putative radical SAM superfamily protein	Cytoplasmic	Unknown function	Enzymes of unknown specificity	x		x		32.3693	32.6565	31.3906	32.4911	32.6049	32.7122	33.2157	33.1709	33.9902	470094200	344766800	214494600	262228700	501928800	545384300	907519400	256140200	1242538000	15	14	13	11	13	11	9	8	14
CDIF630erm_01872	CDIF630erm_01872	putative lipoprotein	Unknown	Unknown function	Unknown function	x		x		28.2642	28.2264	28.9427	28.0854	28.32	28.033	27.0006	26.3228	NaN	6558200	4546068	13239750	1150280	11964860	4555543	1165450	-1987367	-5912021	14	13	13	12	12	9	4	2	0
CDIF630erm_01873	CDIF630erm_01873	two-component response regulator	Cytoplasmic	Signal transduction	Two-component systems					24.5487	25.0035	23.8473	23.6195	NaN	NaN	NaN	24.6906	25.4839	-3623300	-2986737	-4687019	-6581802	-6577091	-6042762	-759819	-4205296	308975	4	5	4	2	0	1	1	2	2
CDIF630erm_01874	CDIF630erm_01874	two-component sensor histidine kinase	CytoplasmicMembrane	Signal transduction	Two-component systems					26.7615	26.4144	27.9372	28.5127	27.8778	27.5194	27.3336	27.017	27.7715	-4847100	-5415485	-1607526	1153135	-423886	216084	-3781731	-3612068	-4021816	8	8	10	12	9	9	5	4	4
CDIF630erm_01875	TrxA1	thioredoxin	Cytoplasmic	Energy metabolism	Electron transport		x			31.8456	31.0599	30.5516	29.6164	26.5538	28.3371	NaN	NaN	NaN	120404200	56929570	37713310	13630680	5344656	10967440	-1075677	2871979	-5912021	4	4	3	3	2	2	1	1	0
CDIF630erm_01876	TrxB1	thioredoxin reductase	Cytoplasmic	Protein fate	Protein modification and repair					27.9102	27.7186	28.3806	27.6943	28.2166	27.8912	29.3018	28.8058	27.8741	13212200	7225712	6572706	4035496	13368590	2658387	50815340	30331010	15066800	11	11	9	9	11	6	6	7	7
CDIF630erm_01878	CDIF630erm_01878	putative dinitrogenase iron-molybdenum cofactor	Cytoplasmic	Unknown function	Unknown function					26.7379	26.1932	26.2074	24.9778	NaN	NaN	NaN	NaN	NaN	-3101200	-4187779	-3217020	-5185958	-6158971	-4561819	-5713621	3689112	-5912021	3	3	3	2	1	1	0	1	0
CDIF630erm_01879	CDIF630erm_01879	hypothetical protein	Unknown	Unknown function	Unknown function					30.446	30.0756	30.8129	31.193	30.745	30.3857	30.7283	29.0257	28.6016	45804200	26035230	45727380	62608930	27187780	61497850	10980780	4550543	-1625126	10	9	9	8	7	7	4	4	3
CDIF630erm_01881	AlsT	sodium:alanine symporter	CytoplasmicMembrane	Transport and binding proteins	Amino acids, peptides and amines			x		33.0657	33.5339	33.5991	33.191	33.3689	34.1731	32.9492	32.4394	32.7374	154324200	441658300	609085500	366196400	218529900	467111300	364785900	345290800	268443600	14	13	14	14	11	11	4	4	5
CDIF630erm_01882	RibH	6,7-dimethyl-8-ribityllumazine synthase	Cytoplasmic	Biosynthesis of cofactors, prosthetic groups, and carriers	Riboflavin, FMN, and FAD					26.0088	26.176	26.0636	26.2549	NaN	NaN	NaN	NaN	NaN	-3640100	-4493252	-4933247	-5182917	-6076533	-4616614	-2842968	-2850811	-4561965	3	3	3	2	1	1	1	1	1
CDIF630erm_01883	RibBA	bifunctional 3,4-dihydroxy-2-butanone 4-phosphate synthase/GTP cyclohydrolase-2	Cytoplasmic	Biosynthesis of cofactors, prosthetic groups, and carriers	Riboflavin, FMN, and FAD	x	x	x		31.6777	31.5451	31.0309	29.3405	28.916	29.9396	31.767	32.0015	32.1897	90107200	119069100	67804980	19282660	5139899	27448640	102029600	151995400	141148300	24	27	25	20	16	16	14	18	18
CDIF630erm_01884	RibE	riboflavin synthase alpha subunit	Cytoplasmic	Biosynthesis of cofactors, prosthetic groups, and carriers	Riboflavin, FMN, and FAD	x	x	x		27.9071	28.1205	27.8493	25.3918	24.2547	24.4866	27.5102	28.0902	28.1569	9858200	6592537	1129654	-6219190	-5980896	-5483969	9322447	3862052	21536410	12	9	10	4	3	3	5	5	8
CDIF630erm_01885	RibD	bifunctional diaminohydroxyphosphoribosylaminopyrimidine deaminase/5-amino-6-(5-phosphoribosylamino)uracil reductase	Cytoplasmic	Biosynthesis of cofactors, prosthetic groups, and carriers	Riboflavin, FMN, and FAD	x	x	x		28.2004	27.9592	28.1399	27.5533	27.1788	27.8714	28.0992	28.0879	28.0974	4787200	9731997	3535820	1958997	-308754	3060282	4606601	6352518	2842330	10	10	10	10	7	8	2	3	6
CDIF630erm_01887	RecQ	ATP-dependent DNA helicase	Cytoplasmic	DNA metabolism	DNA replication, recombination, and repair					28.5352	28.1697	27.633	28.1553	27.8644	27.9798	NaN	29.0661	27.2458	-5438200	-4962026	-6057144	-1433001	-3533674	-4703049	-5289982	175849000	-5459065	19	18	15	19	17	7	2	9	4
CDIF630erm_01896	CDIF630erm_01896	rela/spot domain protein	Cytoplasmic	Unknown function	Unknown function	x	x	x		26.6218	26.7335	26.548	27.8875	27.7137	26.9357	NaN	25.722	25.5887	-4644100	-4450352	-3766429	94191.7	893536	-4765238	-5323468	-4288402	-5266714	7	5	8	11	9	3	1	2	2
CDIF630erm_01897	MobA	molybdopterin-guanine dinucleotide biosynthesis protein A	Cytoplasmic	Biosynthesis of cofactors, prosthetic	Pyridine nucleotides	x	x	x		27.7935	27.5913	27.8862	29.6318	29.468	28.8016	28.5313	28.4114	28.473	5369200	3587636	506715	23508440	15274220	9724896	894990	3915013	9096988	8	7	6	5	5	4	3	3	3
CDIF630erm_01898	CDIF630erm_01898	putative NAD(P)-binding protein	Cytoplasmic	Unknown function	Unknown function				x	23.999	25.0495	25.4399	NaN	NaN	NaN	NaN	NaN	NaN	-5993320	-5680917	-6118808	-6677498	-6577091	-6456996	-5713621	-5848637	-5912021	3	3	2	0	0	0	0	0	0
CDIF630erm_01899	CDIF630erm_01899	uncharacterized protein, UPF0145 family	CytoplasmicMembrane	Unknown function	Unknown function	x	x	x		31.932	32.5174	33.0701	34.0155	33.6028	33.7649	32.5326	32.2518	31.7875	398074200	404187900	433631800	554047000	396638300	903930900	161040000	485097600	99488150	9	10	8	10	9	8	4	6	6
CDIF630erm_01901	MoaA	cyclic pyranopterin monophosphate synthase	Cytoplasmic	Biosynthesis of cofactors, prosthetic groups, and carriers	Molybdopterin		x			28.0325	27.7412	28.3725	26.2826	27.0208	26.5337	28.0138	27.0239	25.9976	12973200	10827470	11142380	-2561207	2294009	-2425719	21959710	517022	-1789124	10	11	9	5	7	4	4	2	4
CDIF630erm_01903	CDIF630erm_01903	molybdenum cofactor sulfurase	Cytoplasmic	Biosynthesis of cofactors, prosthetic	Molybdopterin	x	x	x		25.8243	25.6796	25.4721	26.9301	NaN	26.9455	NaN	28.3383	27.0779	-2395400	-6113783	-5198014	-4319594	-5558705	-1847129	-5611774	5059882	-3399578	3	3	3	2	2	2	1	1	1
CDIF630erm_01905	CodB	putative cytosine permease	CytoplasmicMembrane	Transport and binding proteins	Nucleosides, purines and pyrimidines					25.6622	25.9047	26.257	25.6672	26.0998	27.0722	NaN	NaN	NaN	-6113520	-3951040	1489509	-680737	-3950648	-3780280	-3951741	-1006265	-3676088	1	2	3	4	2	2	1	1	1
CDIF630erm_01906	CDIF630erm_01906	uncharacterized protein	Cytoplasmic	Unknown function	Unknown function	x	x	x		26.4978	26.3975	26.0983	26.7525	26.8863	27.0785	27.5304	27.5231	27.9621	9900	-2062567	-2503037	2854.29	377136	2530053	2014709	6751031	1618455	8	8	7	7	7	5	6	6	5
CDIF630erm_01907	CDIF630erm_01907	putative hydantoinase (N-terminal component)	Cytoplasmic	n.d.	n.d.	x	x			26.5101	27.0181	26.7049	27.7109	27.8908	28.383	NaN	NaN	27.1248	-860100	-850915	-2157442	9697939	27810180	24838080	-5713621	-4092718	7239831	5	3	5	4	5	4	0	1	3
CDIF630erm_01909	CDIF630erm_01909	putative hydantoinase (C-terminal component)	Cytoplasmic	n.d.	n.d.	x	x	x		28.2874	27.9358	27.5797	29.557	29.4289	29.4727	28.4038	28.6945	29.0654	534400	5352603	1104853	26114890	16468020	21069220	4435109	20149130	17340330	7	6	6	10	9	7	6	5	6
CDIF630erm_01912	PlsC1	putative 1-acyl-sn-glycerol-3-phosphate acyltransferase	CytoplasmicMembrane	Fatty acid and phospholipid metabolis	Biosynthesis					27.0979	26.5619	26.3952	26.6024	25.9144	NaN	27.1243	NaN	NaN	8334200	546908	-1344092	-2885199	-4544864	-6456996	14996110	-4114688	3139204	8	7	6	4	2	0	3	1	2
CDIF630erm_01917	CDIF630erm_01917	uncharacterized protein	CytoplasmicMembrane	Unknown function	Unknown function		x		x	28.5377	28.5233	28.8792	27.667	27.6647	27.0169	NaN	NaN	NaN	3198600	1144669	1387874	-2617212	-3456225	1761362	-5713621	-5848637	-5912021	7	7	7	6	4	5	0	0	0
CDIF630erm_01919	CDIF630erm_01919	putative sodium:phosphate symporter	CytoplasmicMembrane	Transport and binding proteins	Cations and iron carrying compounds					27.6555	27.5413	27.4542	27.7823	27.2454	27.7718	NaN	27.4919	27.4842	-4670900	-2096150	-1466698	563247	-2036014	507195	-5713621	-393746	-2905155	9	11	9	8	6	4	0	4	4
CDIF630erm_01921	Mrp	iron-sulfur cluster carrier protein	Unknown	DNA metabolism	Chromosome-associated proteins	x	x	x		31.7338	31.7716	31.7873	29.8444	30.5467	30.0543	32.0899	30.8358	31.1087	270754200	216398100	186294600	34332400	102927600	46872110	420829600	131084000	237110200	9	11	9	6	8	8	9	7	9
CDIF630erm_01922	CDIF630erm_01922	putative acetyltransferase	Cytoplasmic	Unknown function	Unknown function	x	x			25.5223	24.1812	25.0643	26.459	26.5706	26.1635	26.3234	26.6501	27.0494	-4873100	-5983604	-5579800	-1420394	-1642805	-428640	-2747833	967842	-617917	8	4	3	8	8	4	2	3	3
CDIF630erm_01923	MtbC	dimethylamine corrinoid protein	Cytoplasmic	Biosynthesis of cofactors, prosthetic	Heme, porphyrin, and cobalamin					29.8804	28.9136	29.0989	29.4146	30.0377	29.0864	NaN	NaN	NaN	-5265300	-5687098	-6400192	986158	49115920	35155290	-4794098	-5614929	-5912021	3	4	2	3	3	3	1	1	0
CDIF630erm_01924	HemE	uroporphyrinogen decarboxylase	Cytoplasmic	Biosynthesis of cofactors, prosthetic	Heme, porphyrin, and cobalamin			x		27.0546	25.2812	26.3217	26.1142	25.9579	NaN	NaN	26.5356	26.9984	707300	-3704428	-3483185	-2906295	-3019841	-5312012	-2498168	1064447	-2370857	7	6	6	4	5	3	1	4	3
CDIF630erm_01925	CDIF630erm_01925	putative activase of vitamin B12-dependent protein	Cytoplasmic	Unknown function	Unknown function					24.5747	25.7294	26.0307	NaN	NaN	NaN	NaN	NaN	NaN	-4573800	-5200334	-736968	-6626657	-5469232	-5568931	-5713621	-5848637	-334476	4	3	3	1	1	1	0	0	1
CDIF630erm_01927	CDIF630erm_01927	transcriptional regulator, HTH-type	Unknown	Regulatory functions	DNA interactions					NaN	NaN	NaN	23.1146	23.4606	NaN	NaN	NaN	NaN	-6692320	-6758146	-6657118	-6169900	-6249145	-6387992	-5713621	-5848637	-5912021	1	0	1	2	2	1	0	0	0
CDIF630erm_01928	CDIF630erm_01928	putative divalent ion symporter	CytoplasmicMembrane	Transport and binding proteins	Carbohydrates, organic alcohols, and acids					NaN	24.7342	25.1615	NaN	NaN	NaN	NaN	NaN	NaN	-6590750	-5832593	-3961925	-6518321	-6198387	-5399655	-5713621	-5848637	-5392133	1	2	5	1	1	1	0	0	1
CDIF630erm_01929	CDIF630erm_01929	two-component sensor histidine kinase	CytoplasmicMembrane	Signal transduction	Two-component systems		x			25.8589	25.9038	26.1598	26.1784	26.6055	26.2249	NaN	NaN	NaN	-6444780	-6345670	-4859658	-5693106	-5708793	-6032392	-5564124	-5191361	-5429605	6	6	10	4	4	4	1	1	1
CDIF630erm_01930	CDIF630erm_01930	two-component response regulator	Cytoplasmic	Signal transduction	Two-component systems					22.5588	22.6717	21.9684	NaN	NaN	NaN	NaN	NaN	NaN	-6602210	-6442561	-6604850	-6677498	-6230010	-6456996	-5713621	-5848637	-5912021	2	2	1	0	2	0	0	0	0
CDIF630erm_01941	Add	adenosine deaminase	Cytoplasmic	Purines, pyrimidines, nucleosides, and nucleotides	Salvage of nucleosides and nucleotides					26.5483	25.24	24.6067	24.5837	NaN	NaN	NaN	NaN	NaN	-2442200	-5568729	-4976803	-6139041	-5852357	-4874357	-5713621	-4792979	-5746043	7	6	6	2	2	2	0	2	1
CDIF630erm_01943	YjiM	putative 2-hydroxyacyl-CoA dehydratase	Cytoplasmic	Energy metabolism	Fermentation	x	x	x		34.7648	34.2759	34.4528	32.5782	32.4864	32.0547	32.9321	33.1923	33.0871	944934200	906154800	810604400	249022800	222233300	180037200	380653200	611762100	417113900	25	24	23	20	21	13	13	14	14
CDIF630erm_01944	YjiL	putative 2-hydroxyacyl-CoA dehydratase activase	CytoplasmicMembrane	Fatty acid and phospholipid metabolis	Biosynthesis	x	x	x		34.4419	34.4147	34.1386	32.1764	32.2536	32.2442	32.9502	33.5136	33.9839	1036554000	884195900	543387600	133685600	221257500	154716900	523101000	175424000	892601700	21	20	20	19	17	16	15	12	18
CDIF630erm_01945	Cwp13	putative cell wall binding protein	Cellwall	Cell envelope	Other	x	x	x		32.7458	32.672	32.6963	31.7747	31.2802	31.7576	29.9387	29.3605	28.0447	62532200	96251660	59221950	53675000	54429240	86554860	3266425	1438278	-4126857	35	35	31	31	27	27	11	11	8
CDIF630erm_01952	Def1	peptide deformylase	Cytoplasmic	Protein fate	Protein modification and repair	x				27.7112	26.969	28.0099	24.7285	NaN	NaN	NaN	26.3434	NaN	2526400	-4513181	7493255	-5228025	-3518335	-6177440	-4463354	1198156	-5723090	5	6	4	3	1	1	1	3	1
CDIF630erm_01955	CDIF630erm_01955	methyltransferase domain protein	Cytoplasmic	Biosynthesis of cofactors, prosthetic	Menaquinone and ubiquinone					23.3861	24.1733	NaN	NaN	NaN	NaN	24.5002	NaN	NaN	-6393900	-6371936	-6722046	-6677498	-6413255	-6456996	466665	-5848637	-5912021	2	2	0	0	1	0	3	0	0
CDIF630erm_01961	CDIF630erm_01961	putative phenylalanyl-tRNA synthetase beta chain	Cytoplasmic	Protein synthesis	tRNA aminoacylation	x	x	x		28.6124	27.6686	27.3348	26.0562	24.8288	26.9058	29.663	28.0988	29.5477	24713200	18944000	12560890	-5926248	-5426531	-762714	120274600	36751690	97789580	13	11	12	4	2	7	10	8	12
CDIF630erm_01965	CDIF630erm_01965	putative membrane protein	CytoplasmicMembrane	Unknown function	Unknown function					35.2156	36.0299	35.408	35.3955	35.2434	36.0106	35.2833	34.2807	33.8983	971264200	1392387000	1887204000	1460476000	1255631000	1787617000	1906917000	1458236000	997221800	9	10	9	8	8	9	8	5	4
CDIF630erm_01966	CDIF630erm_01966	putative CoA-substrate dehydratase and activase	Cytoplasmic	Fatty acid and phospholipid metabolis	Biosynthesis					31.7744	31.6514	30.715	30.9968	30.7371	30.4701	30.8966	29.8876	31.7661	5593200	11239400	5719266	14401820	6725467	4604463	1789749	1827148	9463008	42	46	39	40	30	26	12	15	21
CDIF630erm_01968	CDIF630erm_01968	putative monooxygenase	Cytoplasmic	Cellular processes	Other					25.571	26.2172	26.0631	25.3378	NaN	25.8338	NaN	NaN	NaN	-3138900	-3343968	-5210015	-5525154	-5442910	-2772755	-3705976	-4082373	-5912021	3	3	3	2	1	2	1	1	0
CDIF630erm_01969	CDIF630erm_01969	hypothetical protein	Unknown	Unknown function	Unknown function				x	23.8952	22.775	22.9062	22.9599	NaN	NaN	NaN	NaN	NaN	-6237160	-6593859	-6325283	-6299206	-6577091	-6456996	-5713621	-5848637	-5912021	2	2	2	2	0	0	0	0	0
CDIF630erm_01972	CDIF630erm_01972	ABC-type transport system, aminoacid-family extracellular solute-binding protein	Unknown	Transport and binding proteins	Amino acids, peptides and amines	x	x			29.0429	29.3396	29.5718	28.5111	28.2167	28.8552	28.4181	26.5961	28.1219	24241200	24926560	31192640	2034636	15527030	18789910	25063880	-808460	15307300	12	14	11	10	8	10	5	3	5
CDIF630erm_01973	CDIF630erm_01973	ABC-type transport system, aminoacid-family permease	CytoplasmicMembrane	Transport and binding proteins	Amino acids, peptides and amines					28.4991	28.5068	28.0395	27.7791	27.7762	28.3346	NaN	NaN	NaN	-2302400	1895977	5525236	3690126	2140996	3719504	-5276052	-5568914	-5912021	4	4	4	4	4	4	1	1	0
CDIF630erm_01974	CDIF630erm_01974	ABC-type transport system, aminoacid-family ATP-binding protein	CytoplasmicMembrane	Transport and binding proteins	Amino acids, peptides and amines		x			27.0065	27.1518	26.5173	25.4739	26.2846	26.0255	26.3657	25.7595	27.0991	6819200	3788238	2649312	-3775321	-940464	-2832853	8930961	-3199591	15552320	5	6	5	3	2	2	2	3	2
CDIF630erm_01975	CDIF630erm_01975	putative arsenate reductase	Unknown	Regulatory functions	DNA interactions					26.3014	26.5499	26.0902	25.1057	NaN	NaN	NaN	NaN	NaN	-1332900	-3919671	-4330758	-5984407	-6577091	-5734230	-5415306	-5064640	-5912021	6	4	6	2	0	1	1	1	0
CDIF630erm_01977	LarE	Ni2+ transfer protein	Cytoplasmic	Unknown function	Unknown function		x			29.7075	29.5629	29.2383	28.3769	28.8247	28.5186	29.4617	28.1899	29.1959	47305200	23330000	14905300	5107759	20008010	11276970	43036430	1161705	32153240	13	13	10	8	9	7	6	3	6
CDIF630erm_01978	CDIF630erm_01978	putative RNA methylase	Cytoplasmic	DNA metabolism	Restriction/modification					28.8329	28.5594	27.9916	27.4576	27.7188	28.2039	27.7624	29.726	29.2648	5203200	2122830	-2591356	7630479	6472663	26483390	-2024759	6953231	5114360	12	10	9	9	7	5	5	7	8
CDIF630erm_01979	CDIF630erm_01979	putative lipoprotein	Unknown	Unknown function	Unknown function		x			28.5918	28.988	29.4485	28.45	27.6686	28.4233	NaN	NaN	NaN	919100	8904824	18459600	-282558	-3779275	3966740	-4789103	-3760690	-3642875	17	14	17	16	8	10	1	1	1
CDIF630erm_01980	CDIF630erm_01980	two-component response regulator	Cytoplasmic	Signal transduction	Two-component systems	x	x	x		29.2021	29.4695	28.6767	27.9336	28.0066	28.6157	29.2862	28.8775	29.3588	31694200	31645480	15445570	3155898	11189450	9651844	98038480	7331639	61827170	11	12	13	8	10	9	12	7	10
CDIF630erm_01981	CDIF630erm_01981	two-component sensor histidine kinase	CytoplasmicMembrane	Signal transduction	Two-component systems	x		x		29.7309	29.8324	30.6386	30.1842	29.0741	30.16	27.7549	27.1364	27.9358	7631200	15041760	26875350	9598039	6462314	11573570	-1293002	-3678795	-1717926	23	23	23	20	16	12	5	5	6
CDIF630erm_01984	ArgG	argininosuccinate synthase	Cytoplasmic	Amino acid biosynthesis	Glutamate family					NaN	NaN	26.8332	27.1927	26.9563	NaN	NaN	NaN	NaN	-6708059	-6268494	-5463607	475716	-2513678	-5200359	-5713621	-5848637	-5912021	2	1	3	6	4	1	0	0	0
CDIF630erm_01991	Tdh	L-threonine 3-dehydrogenase	Cytoplasmic	Energy metabolism	Amino acids and amines	x	x			27.2697	27.0511	26.2826	28.3732	28.6165	28.1115	28.6274	29.1038	28.4982	4700200	-829511	-3462930	18284130	20176550	6807208	14444100	18122240	-88929.6	9	8	7	9	9	8	5	7	5
CDIF630erm_01995	CDIF630erm_01995	putative nitrite and sulfite reductase subunit	Cytoplasmic	Central intermediary metabolism	Sulfur metabolism			x		26.4063	25.301	25.8831	24.8391	NaN	25.6068	26.2383	NaN	25.9618	-122300	-4245811	-4845880	-6546108	-6219538	-6036664	725231	-5848637	-4044768	7	5	6	2	1	2	4	0	3
CDIF630erm_01996	CDIF630erm_01996	coenzyme A disulfide reductase (CoA-disulfide reductase) (CoADR)	Cytoplasmic	Energy metabolism	Other	x	x	x		26.0353	26.1652	25.8261	25.5605	25.4584	25.5923	27.4143	27.1831	26.1146	-4761500	-3522676	-4461110	-5008250	-5846108	-3119202	-3559247	-86903.6	-4888430	8	7	6	6	3	6	4	4	3
CDIF630erm_01997	CDIF630erm_01997	transcriptional regulator, LysR family	Cytoplasmic	Regulatory functions	DNA interactions					23.4804	NaN	NaN	25.1593	25.5774	24.9504	NaN	NaN	NaN	-6265780	-6490380	-6487876	-5969012	-5463361	-4664869	-5713621	-5226309	-4188874	3	1	1	3	4	4	0	1	1
CDIF630erm_01998	TerD4	tellurium resistance protein terD	Cytoplasmic	Cellular processes	Toxin production and resistance	x	x	x		28.1638	28.3769	29.2496	26.2163	25.6449	27.1839	29.2434	28.7142	28.615	21928200	14211280	8343777	-4739947	-4196249	-1705427	12708400	8160050	42998560	9	9	9	5	5	3	6	5	7
CDIF630erm_01999	TerD5	tellurium resistance protein terD	Cytoplasmic	Cellular processes	Toxin production and resistance		x			26.6007	27.5936	28.1846	26.385	25.9441	24.6587	26.2741	25.0946	25.7409	3318200	5364985	1725360	-4269101	-4283072	-5346067	-4360971	-3674951	3470652	13	14	13	8	4	3	3	4	5
CDIF630erm_02000	CDIF630erm_02000	putative membrane protein	CytoplasmicMembrane	Hypothetical proteins	Domain					28.4006	28.5187	29.0996	28.6064	28.1755	28.6364	27.3014	NaN	28.4574	4277200	7027587	10913340	11142210	11061570	11373500	-545892	1798706	13427600	6	6	6	6	5	5	2	1	2
CDIF630erm_02010	CDIF630erm_02010	transcriptional regulator, beta-lactam repressor	Cytoplasmic	Regulatory functions	DNA interactions				x	25.5799	25.5403	25.2015	NaN	NaN	NaN	NaN	NaN	NaN	-4599700	-5787108	-6084382	-6243885	-6577091	-5246965	-5713621	-5848637	-5912021	3	3	3	1	0	1	0	0	0
CDIF630erm_02014	CDIF630erm_02014	putative phosphatase, phosphoserine phosphatase-like	Cytoplasmic	Energy metabolism	Glycolysis/gluconeogenesis					24.7713	24.5225	24.6453	24.9371	24.3494	NaN	NaN	NaN	NaN	-5883650	-6123304	-6100770	-5683476	-5144003	-5167276	-4853633	-5848637	-2286428	2	3	3	3	3	1	1	0	1
CDIF630erm_02015	CDIF630erm_02015	hypothetical protein	Unknown	Unknown function	Enzymes of unknown specificity					NaN	NaN	23.597	24.2926	25.1415	24.4896	NaN	24.7638	25.6232	-6549770	-6599302	-6528728	-6218043	-5664596	-4163139	-5713621	-3429547	-3169694	1	1	2	3	4	4	0	3	4
CDIF630erm_02016	Cmk	cytidylate kinase	Cytoplasmic	Purines, pyrimidines, nucleosides, and nucleotides	Nucleotide and nucleoside interconversions	x	x	x		27.277	26.8755	27.4317	27.6271	28.0896	28.5577	29.6391	29.2805	28.8824	4325200	-3660420	1716120	15222.9	7195593	5605472	70969360	48146440	37194100	10	7	9	10	6	7	11	8	8
CDIF630erm_02017	PlsC2	putative 1-acyl-sn-glycerol-3-phosphate acyltransferase	Cytoplasmic	Fatty acid and phospholipid metabolism	Biosynthesis	x		x		31.4716	30.9763	31.9679	32.0619	32.0041	31.384	29.5767	30.2574	29.931	74339200	71618080	77856620	100494900	85704460	51378080	11088180	21245940	18830720	18	18	16	16	16	10	5	5	7
CDIF630erm_02018	IspH	4-hydroxy-3-methylbut-2-enyl diphosphate reductase	Cytoplasmic	Biosynthesis of cofactors, prosthetic groups, and carriers	Other					26.2273	25.5777	25.5854	25.6404	26.4458	NaN	NaN	NaN	26.6292	927200	-2379389	-3727571	-5436586	-4396973	-6316217	-5713621	-5848637	-2759069	5	4	4	4	3	1	0	0	2
CDIF630erm_02019	CDIF630erm_02019	putative membrane protein	CytoplasmicMembrane	Hypothetical proteins	Domain				x	24.3635	23.8713	25.3526	NaN	NaN	NaN	NaN	NaN	NaN	-6499330	-6479659	-4309869	-5712682	-1504855	-1328342	-5713621	-5848637	-5912021	2	1	2	2	3	2	0	0	0
CDIF630erm_02024	CDIF630erm_02024	hypothetical protein	Cytoplasmic	Unknown function	Unknown function					24.9246	24.282	NaN	NaN	NaN	NaN	NaN	NaN	NaN	-4758300	-5681655	-5861330	-6677498	-6074810	-6456996	-4686367	-5848637	-5217092	3	3	2	0	2	0	1	0	1
CDIF630erm_02025	CDIF630erm_02025	P-type calcium transport ATPase	CytoplasmicMembrane	Transport and binding proteins	Cations and iron carrying compounds	x		x		26.8301	26.2275	27.3122	27.2598	26.9117	27.3618	NaN	25.895	25.1962	-6420430	-5658959	-4183326	-4907328	-5136429	-5131600	-5713621	-5163636	-5704188	6	7	11	9	7	6	0	2	2
CDIF630erm_02027	MetY	O-acetylhomoserine sulfhydrylase	Cytoplasmic	Amino acid biosynthesis	Serine family	x	x	x		27.1286	26.6944	26.9957	27.7199	28.1094	27.493	28.4377	29.0768	29.4708	-236200	-2161931	-2474274	1402410	2430760	1466522	3056478	13149810	23229720	7	7	7	8	8	7	5	5	6
CDIF630erm_02028	MetA	homoserine O-succinyltransferase	Cytoplasmic	Amino acid biosynthesis	Aspartate family					25.668	25.5598	NaN	25.8818	26.7252	26.2404	NaN	NaN	25.1388	-3933600	-5570389	-6109729	-2262937	278749	-3676994	-5713621	-3439799	-4836044	6	5	3	6	8	4	0	1	3
CDIF630erm_02029	CDIF630erm_02029	transcriptional regulator, MarR family	Cytoplasmic	Regulatory functions	DNA interactions					24.8187	25.3851	25.3459	26.4899	25.9084	25.0483	26.5648	NaN	NaN	-3757100	-4802970	-5112616	-1759907	-4980300	-2960414	-3235588	-5359017	-5630965	3	3	3	3	2	2	2	1	1
CDIF630erm_02030	FtsH1	cell division protease FtsH1	CytoplasmicMembrane	Protein fate	Degradation of proteins, peptides, and glycopeptides					32.2714	32.1922	32.9231	33.067	32.8144	32.8897	32.4192	33.0869	33.0573	63047200	73853590	111439900	127520300	88254670	89895940	60798810	87932420	47007500	31	29	29	27	28	25	16	15	17
CDIF630erm_02031	KdpD	two-component sensor histidine kinase KdpD	CytoplasmicMembrane	Signal transduction	Two-component systems					24.9974	24.8902	24.8298	25.5614	NaN	25.097	NaN	NaN	NaN	-6647244	-6550072	-6390084	-6230289	-6409430	-6036016	-5713621	5904149	260197	3	3	3	5	2	4	0	2	2
CDIF630erm_02033	CDIF630erm_02033	putative cation (Mg2+ and Co2+) transport-related, membrane protein	CytoplasmicMembrane	Transport and binding proteins	Cations and iron carrying compounds	x	x			25.8699	25.6536	25.9019	27.0532	26.8317	27.2643	26.9963	25.9126	NaN	-5645800	-4858234	-1478507	-3422883	790788	2148121	5013446	-2235962	-3124149	4	6	7	7	8	7	5	4	2
CDIF630erm_02034	AroF2	3-deoxy-7-phosphoheptulonate synthase	Cytoplasmic	Amino acid biosynthesis	Aromatic amino acid family	x	x	x		31.1111	30.8339	30.7271	30.0664	30.1375	30.3331	31.3334	31.5218	31.4096	118224200	79155100	65412430	28342190	38953510	49340080	104893500	150521000	59947470	17	20	16	14	14	9	11	12	10
CDIF630erm_02035	AroB	3-dehydroquinate synthase	Cytoplasmic	Amino acid biosynthesis	Aromatic amino acid family		x			26.4531	25.7214	26.8266	27.0597	27.7655	27.3603	26.5326	27.9463	27.5568	-1970300	-5387438	-2216301	-1358687	2331708	1106967	-2821701	3177158	12401.1	11	7	9	10	12	6	3	4	7
CDIF630erm_02036	AroA	3-phosphoshikimate 1-carboxyvinyltransferase	Cytoplasmic	Amino acid biosynthesis	Aromatic amino acid family					25.2297	NaN	NaN	27.3594	27.6389	26.0766	NaN	NaN	NaN	-6330230	-6362978	-6505413	327292	-1859435	-5244107	-5713621	-5848637	-1534126	5	4	2	8	5	4	0	0	2
CDIF630erm_02038	PheA	bifunctional P-protein, chorismate mutase/prephenate dehydratase	Cytoplasmic	Amino acid biosynthesis	Aromatic amino acid family					NaN	NaN	NaN	27.021	26.5914	NaN	NaN	NaN	NaN	-6328480	-5804361	-5857393	-2025867	-3832297	-6330560	-5713621	-5848637	-5602189	1	1	2	3	4	1	0	0	2
CDIF630erm_02039	AroE1	shikimate dehydrogenase	Cytoplasmic	Amino acid biosynthesis	Aromatic amino acid family	x	x	x		29.0261	29.048	28.5491	26.8806	26.8069	27.51	29.1	28.6496	29.2059	32800200	17475390	12153870	-3096864	777334	-1721335	40902320	3304656	49909350	16	15	15	7	9	6	9	5	11
CDIF630erm_02040	AroK	shikimate kinase	Cytoplasmic	Amino acid biosynthesis	Aromatic amino acid family					29.9495	30.2031	30.4972	30.7916	31.6348	30.2991	29.6504	30.4788	30.6808	65412200	48052730	28217020	54450410	68362270	59214150	37224200	41648930	188407700	14	12	13	14	12	12	9	8	13
CDIF630erm_02041	TyrC	prephenate dehydrogenase	Cytoplasmic	Amino acid biosynthesis	Aromatic amino acid family	x	x			28.7975	27.9583	26.9343	29.7914	30.1305	29.8355	30.5106	29.5625	30.1809	16782200	4936539	-664712	22293460	67639340	44726620	148371600	57730050	93017040	13	11	10	12	12	10	8	5	9
CDIF630erm_02042	CDIF630erm_02042	two-component response regulator	CytoplasmicMembrane	Signal transduction	Other					25.4428	25.2653	25.9242	25.9235	25.0593	NaN	NaN	NaN	NaN	-6064380	-5867808	-4956739	-5182727	-6049312	-5563657	-5713621	55249.2	-5912021	4	5	5	5	3	2	0	2	0
CDIF630erm_02043	CDIF630erm_02043	two-component sensor histidine kinase	CytoplasmicMembrane	Signal transduction	Other	x		x		28.6376	28.37	29.481	29.3238	28.7747	28.938	26.4758	28.0822	27.6014	-4458700	-3282246	1063518	2064606	-2232193	-965103	-5583012	-3668404	-4617141	19	20	24	27	17	14	2	6	7
CDIF630erm_02044	CDIF630erm_02044	uncharacterized protein, rossmann-like fold	CytoplasmicMembrane	Unknown function	Unknown function					27.5579	28.3538	28.1764	27.4122	27.4079	27.5779	NaN	NaN	NaN	723800	7650030	8343291	5642463	3586856	-1911056	-4492574	-5848637	-5912021	7	8	8	8	8	5	1	0	0
CDIF630erm_02064	CDIF630erm_02064	putative conjugative transposon protein Tn1549-like, CTn5	Unknown	Mobile and extrachromosomal element functions	Transposon functions				x	23.8721	24.3127	24.3344	NaN	NaN	NaN	NaN	NaN	NaN	-5524800	-5529518	-5494973	-6677498	-6577091	-6456996	-5713621	-5848637	-5912021	3	3	2	0	0	0	0	0	0
CDIF630erm_02068	CDIF630erm_02068	putative DNA recombination protein Tn1549-like, CTn5	Cytoplasmic	DNA metabolism	DNA replication, recombination, and repair	x	x			29.0603	28.8787	28.8983	30.2049	30.2432	30.3898	30.3678	29.9282	30.0858	2462200	6460453	4841025	37653370	26352500	54129040	20289830	32961070	27656530	17	18	16	22	17	17	11	15	14
CDIF630erm_02069	CDIF630erm_02069	putative conjugative transposon protein tn1549-like, CTn5	Cytoplasmic	Mobile and extrachromosomal element functions	Transposon functions	x	x			28.1616	27.3295	26.5614	29.0742	29.379	29.2688	29.912	29.0475	29.3521	2089700	-2249855	-5011280	12595520	21882600	19684960	29919920	17179080	10981200	9	8	7	11	12	11	7	8	9
CDIF630erm_02070	CDIF630erm_02070	putative conjugative transposon protein Tn1549-like, CTn5	Cytoplasmic	Mobile and extrachromosomal element functions	Transposon functions	x	x	x		25.7675	25.9832	25.4763	23.5329	23.3606	NaN	NaN	25.8858	25.5049	-2013800	-2975112	-2708629	-5749554	-6280484	-6116176	-5713621	-1008827	-4596258	3	2	2	2	2	1	0	2	2
CDIF630erm_02071	CDIF630erm_02071	putative conjugative transposon protein Tn1549-like, CTn5	Cytoplasmic	Mobile and extrachromosomal element functions	Transposon functions					NaN	NaN	26.0786	NaN	24.2446	NaN	25.2129	NaN	25.9652	-6294030	-6191890	-1231010	-6478637	-5569783	-6456996	30025.5	1870464	847408	1	2	2	1	2	0	2	1	3
CDIF630erm_02074	CDIF630erm_02074	putative oxidoreductase Tn1549-like, CTn5	Unknown	Unknown function	Unknown function			x		28.5613	28.78	30.2186	29.8066	29.8401	29.6868	NaN	28.0666	27.8249	10557200	15366190	30194770	20880110	28248530	30927930	-3523634	5737911	2204688	13	13	17	18	15	14	1	4	4
CDIF630erm_02076	VexP1	ABC-type transport system, permease Tn1549-like,CTn5	CytoplasmicMembrane	Transport and binding proteins	Amino acids, peptides and amines					25.6415	25.7696	26.6608	25.7125	25.8654	26.4335	NaN	25.295	NaN	-6402330	-5539667	-1536985	-5359801	-5694941	-4385649	-5616925	-4437373	-5785476	4	7	8	6	4	6	1	3	1
CDIF630erm_02077	VexP2	ABC-type transport system, ATP-binding protein Tn1549-like, CTn5	CytoplasmicMembrane	Transport and binding proteins	Amino acids, peptides and amines	x				26.2675	27.2597	26.7647	25.7649	26.2671	26.3621	25.4679	24.824	26.1025	3420200	7304962	4789964	-5288338	-4296800	-2677895	-2746953	-4778814	2688256	9	8	8	4	3	3	4	3	4
CDIF630erm_02078	VexP3	ABC-type transport system, permease Tn1549-like,CTn5	CytoplasmicMembrane	Transport and binding proteins	Amino acids, peptides and amines					28.8477	29.1834	29.8044	29.6985	29.6704	29.2825	27.8551	29.5449	28.9838	-1239100	17574460	29351540	15472180	11337290	16706510	2134349	230771300	5421005	13	14	16	15	12	12	8	5	6
CDIF630erm_02079	VncR	two-component response regulator, Tn1549-like, CTn5	Cytoplasmic	Signal transduction	Two-component systems					28.8969	26.7838	26.117	27.2573	27.3005	26.4813	25.0287	25.4873	27.6178	15971200	-1861440	-3950432	-5513751	-186332	-2367683	-5203933	-5371086	6141771	6	6	5	4	4	3	2	2	4
CDIF630erm_02080	VncS	two-component sensor histidine kinase, Tn154c-like, CTn5	Unknown	Signal transduction	Two-component systems					25.5776	25.357	26.4849	26.3644	26.2971	26.9431	NaN	NaN	NaN	-5437600	-2895861	-1386061	-5284853	-5156785	-2956879	-5216416	-4336490	-4977180	7	6	7	6	4	6	1	1	1
CDIF630erm_02088	CDIF630erm_02088	transcriptional regulator, AraC family	Cytoplasmic	Regulatory functions	DNA interactions					26.4353	26.0916	26.7144	23.9952	NaN	NaN	NaN	NaN	NaN	-2926000	-5744115	-5084742	-6134752	-6485059	-6456996	-4178252	-4835778	-5146434	7	4	6	3	2	0	1	1	1
CDIF630erm_02094	CDIF630erm_02094	ABC-type transport system, multidrug-family ATP-binding protein	CytoplasmicMembrane	Cellular processes	Toxin production and resistance					26.178	NaN	26.3782	26.4058	26.3088	26.9544	NaN	NaN	NaN	-5597500	-5816078	-1897310	-4970871	-3891661	-3724483	-1169805	-3411142	-3263034	2	1	3	3	2	4	1	1	1
CDIF630erm_02097	CDIF630erm_02097	putative methyltransferase, type 11 family	Cytoplasmic	Biosynthesis of cofactors, prosthetic	Menaquinone and ubiquinone	x				25.2834	25.2945	25.3215	NaN	NaN	25.8254	NaN	26.7251	27.7836	-2838700	-4953630	-3860716	-6677498	-6510778	-4410808	1239013	-88301.5	23951990	3	3	3	0	2	2	1	2	3
CDIF630erm_02100	CDIF630erm_02100	putative membrane protein	Unknown	Unknown function	Unknown function			x		29.0592	29.9457	30.4027	30.7429	30.3056	30.4321	28.3296	30.1268	30.0601	36795200	40344000	77316820	112059600	68306090	52567090	3873517	65018700	25951200	5	5	8	9	7	4	2	3	3
CDIF630erm_02101	CDIF630erm_02101	hypothetical protein	CytoplasmicMembrane	Unknown function	Unknown function					32.302	31.8332	31.4575	31.5507	29.8864	30.7858	NaN	30.3892	NaN	624634200	269949800	184826000	380986400	321425500	613324700	-4652793	46170210	5011393	3	3	3	3	3	3	1	2	1
CDIF630erm_02102	CDIF630erm_02102	uncharacterized protein	Cytoplasmic	Unknown function	Unknown function					27.8361	27.809	26.9393	27.1734	27.4044	26.6277	28.2123	NaN	NaN	3471200	-828865	-1152913	4737176	-1799691	-1315674	-470514	703365	-4372314	5	3	3	4	3	3	3	1	1
CDIF630erm_02103	CDIF630erm_02103	putative phage-related cell wall hydrolase (endolysin)	Cellwall	Cell envelope	Biosynthesis and degradation of murein sacculus and peptidoglycan	x	x			31.17	31.1917	31.3033	29.6182	28.9724	28.9021	29.3001	NaN	NaN	46301200	35437930	37424450	3271497	2071364	3242363	9888312	-4674809	-3971950	15	17	14	9	8	7	4	1	1
CDIF630erm_02104	ComEB1	deoxycytidylate deaminase	Unknown	Purines, pyrimidines, nucleosides, and nucleotides	2'-Deoxyribonucleotide metabolism					27.7984	26.956	26.5925	NaN	NaN	NaN	NaN	NaN	NaN	967400	-3851583	-4677813	-6605750	-6577091	-6456996	-5713621	-4783403	-5733639	4	4	3	1	0	0	0	1	1
CDIF630erm_02112	EutS	ethanolamine carboxysome structural protein	CytoplasmicMembrane	Energy metabolism	Amino acids and amines					24.1809	24.3317	NaN	NaN	NaN	NaN	NaN	NaN	NaN	-5915920	-5895606	-6432161	-6677498	-6577091	-6456996	-5713621	-5848637	-5912021	2	2	2	0	0	0	0	0	0
CDIF630erm_02113	EutP	ethanolamine utilization protein	Unknown	Energy metabolism	Amino acids and amines					NaN	NaN	25.0959	26.3085	26.4983	26.1768	26.4051	NaN	NaN	-4446500	-6600437	-6338076	-4742988	2032039	-3104472	-3941296	-5848637	-5912021	2	1	2	3	4	3	2	0	0
CDIF630erm_02114	EutV	two-component response regulator, ethanolamine specific	Cytoplasmic	Signal transduction	Two-component systems					NaN	NaN	NaN	23.8011	25.5978	24.0303	NaN	25.4256	26.5134	-3804800	-4003443	-3585409	-4868365	-4426797	-5379504	-2835292	-3788042	6966256	2	2	2	3	2	2	2	2	3
CDIF630erm_02115	EutW	two-component sensor histidine kinase, ethanolamine specific	Cytoplasmic	Signal transduction	Two-component systems		x			26.293	26.2657	26.2298	27.4397	27.2451	27.2729	26.0519	26.3862	27.2963	-5477800	-5155403	-5493703	416251	-398795	523429	-4800906	-2477801	-2179136	8	7	7	8	9	8	2	4	6
CDIF630erm_02125	CDIF630erm_02125	putative ethanolamine utilization protein	Cytoplasmic	Unknown function	Unknown function					29.028	NaN	28.1099	NaN	NaN	NaN	NaN	NaN	NaN	25666200	-5083071	7961553	-5521797	-6577091	-6456996	-5713621	-5848637	-5912021	2	1	2	1	0	0	0	0	0
CDIF630erm_02134	CDIF630erm_02134	putative exported protein	Unknown	Unknown function	Enzymes of unknown specificity	x	x	x		27.3829	28.5111	29.0118	27.0016	26.905	26.9472	25.9491	25.6783	26.3615	1006000	6528146	7514165	-2753613	-750723	-795709	-472402	-3870543	-2067974	9	9	10	8	5	5	3	2	3
CDIF630erm_02135	LexA	transcriptional regulator, LexA repressor	Cytoplasmic	Transcription	Transcription factors	x				25.4189	25.4065	24.2662	NaN	25.2164	26.2764	26.5601	26.828	26.4668	-2016200	-3080842	-5308175	-6571811	-2813532	426246	8746189	843777	6393551	3	3	3	1	2	2	3	3	3
CDIF630erm_02140	AccA	acetyl-CoA carboxylase, subunit alpha	Cytoplasmic	Fatty acid and phospholipid metabolism	Biosynthesis	x		x		28.6852	28.4445	27.5914	27.5997	28.177	27.2492	29.0298	29.1777	29.1459	19308200	9642015	7491310	8607599	9205456	868725	27050180	15402280	8079348	14	13	10	11	8	6	6	5	6
CDIF630erm_02141	AccD	acetyl-CoA carboxylase, subunit beta	Cytoplasmic	Fatty acid and phospholipid metabolism	Biosynthesis			x		29.2509	29.1137	28.4047	28.177	28.4587	28.4853	30.3031	28.7639	29.5679	44813200	36062850	16900550	11988990	20471480	2970996	133647500	9445330	68072060	12	12	10	10	9	7	11	4	9
CDIF630erm_02142	AccC	biotin carboxylase	Cytoplasmic	Fatty acid and phospholipid metabolism	Biosynthesis			x		29.7331	29.3048	28.986	29.8308	29.8534	29.5177	28.5904	29.2802	29.1281	11661200	15987800	8257218	20010030	16789570	9108671	1921515	3831322	9390857	19	18	17	20	16	11	8	6	10
CDIF630erm_02143	AccB	biotin carboxyl carrier protein	Cytoplasmic	Fatty acid and phospholipid metabolism	Biosynthesis					NaN	NaN	26.7909	25.7064	NaN	NaN	27.0529	NaN	26.5242	52500	89404	-61588.6	-2556709	-6577091	-6456996	486413	1288876	-2999485	1	1	2	2	0	0	2	1	2
CDIF630erm_02148	CDIF630erm_02148	FeS cluster biogenesis protein	Unknown	Unknown function	Unknown function		x			27.8515	28.4285	27.6885	26.1129	NaN	26.2128	NaN	28.0943	NaN	3236600	3083242	2147460	1174066	-3648995	-3851690	-4696585	81750390	-5912021	3	3	2	2	1	2	1	1	0
CDIF630erm_02155	CDIF630erm_02155	putative membrane protein	CytoplasmicMembrane	Hypothetical proteins	Domain		x			30.4391	30.9385	30.3218	29.6937	29.671	30.3038	30.0879	30.0825	30.2595	80972200	86956280	66988010	16956410	23703230	60561120	97599650	9333851	58883230	11	11	10	9	9	9	5	4	7
CDIF630erm_02158	CDIF630erm_02158	uncharacterized protein, coenzyme F420:L-glutamate ligase-like	Unknown	Unknown function	Unknown function	x	x	x		28.9618	28.9617	29.1597	28.8923	28.9185	28.4219	28.968	30.3247	29.8344	17623200	15705470	11175940	9590427	11791150	4876708	9571890	33423660	22917810	20	23	22	16	16	12	11	12	10
CDIF630erm_02160	CDIF630erm_02160	ABC-type transport system, ATP-binding protein	CytoplasmicMembrane	Transport and binding proteins	Amino acids, peptides and amines					24.039	24.3632	23.5596	NaN	NaN	NaN	NaN	NaN	NaN	-5100800	-5263532	-5490973	-6637033	-6577091	-6456996	-5713621	-5848637	-4287975	3	3	3	1	0	0	0	0	1
CDIF630erm_02168	CDIF630erm_02168	putative methyltransferase	Cytoplasmic	Cellular processes	Other	x				23.9344	24.5956	24.8393	NaN	NaN	24.0989	NaN	25.6572	25.6744	-4991900	-6532487	-6439863	-6551335	-6388714	-4674826	-4126029	64239.5	-3965830	6	2	3	1	1	2	1	2	3
CDIF630erm_02169	CDIF630erm_02169	putative transcriptional regulator	Unknown	Regulatory functions	DNA interactions					23.6742	NaN	NaN	23.7768	NaN	24.1962	NaN	NaN	NaN	-6218640	-5864358	-3255815	-6410233	-6460719	-4623802	-4098847	-4715441	-2660958	3	2	2	2	1	2	1	1	2
CDIF630erm_02171	Baat	putative bile acid-CoA:amino acid N-acyltransferase	Cytoplasmic	Fatty acid and phospholipid metabolis	Degradation					NaN	NaN	NaN	24.185	24.524	NaN	NaN	NaN	NaN	-6694921	-6626731	-6654534	-6018238	-5976455	-6333854	-5713621	-5408061	-5912021	1	1	1	2	2	1	0	1	0
CDIF630erm_02174	CDIF630erm_02174	putative oligonucleotide binding regulator	Unknown	Regulatory functions	RNA interactions	x	x			26.1186	26.0542	26.281	27.0724	27.7265	NaN	27.3658	27.1087	27.6027	-3250200	-4437989	-4253042	-1343736	-2569161	-6038667	-531924	3090851	10339350	6	4	5	4	4	1	2	2	2
CDIF630erm_02175	CDIF630erm_02175	putative enzyme, cyclase family	Cytoplasmic	Unknown function	Enzymes of unknown specificity					26.313	26.2881	25.3456	NaN	NaN	NaN	25.8653	26.2467	NaN	-2024800	-1527735	-3547249	-6449684	-5752090	-5828766	-3221619	-4880022	-816118	7	5	7	1	1	1	2	3	1
CDIF630erm_02176	CDIF630erm_02176	putative protein, Sir2 family, putative silencing, chromosome stability or ageing, putative ADP ribosyltransferase	Unknown	Purines, pyrimidines, nucleosides, and nucleotides	Other					24.8545	24.4116	23.9239	23.6852	23.7487	NaN	NaN	NaN	NaN	-5018700	-5033343	-6387436	-6526051	-5882494	-6298585	-3604801	-5848637	-5912021	6	6	3	2	3	1	2	0	0
CDIF630erm_02178	CDIF630erm_02178	aluminum resistance protein	Cytoplasmic	Cellular processes	Toxin production and resistance	x	x			25.0252	24.5117	25.5724	26.6668	26.7922	27.0361	NaN	NaN	26.2078	-6126540	-5905995	-4689940	-3116377	-1924764	578931	-4781313	-5848637	-4492027	4	4	7	5	5	4	1	0	2
CDIF630erm_02181	MutL	DNA mismatch repair protein MutL	Cytoplasmic	DNA metabolism	DNA replication, recombination, and repair	x	x			29.0229	29.2682	28.5996	30.338	30.2946	30.2245	30.0057	30.5317	30.5172	-3614100	-451152	-3286990	22548920	17414190	10239550	4388223	25195120	8754267	19	23	16	26	24	18	9	13	12
CDIF630erm_02182	MutS	DNA mismatch repair protein MutS	CytoplasmicMembrane	DNA metabolism	DNA replication, recombination, and repair		x			28.5561	28.55	27.9689	29.3236	29.5156	29.417	27.7452	29.39	29.3712	-5536600	-4629890	-5544561	3251992	3065726	-1730762	-4603351	4970143	-2481749	24	20	21	31	26	18	4	13	11
CDIF630erm_02183	CDIF630erm_02183	ABC-type transport system, ATP-binding protein	CytoplasmicMembrane	Transport and binding proteins	Anions					26.5912	27.2405	27.0199	26.4562	26.7175	27.7103	NaN	25.764	27.188	-982100	9025350	2097859	-5181713	471900	2798129	-5713621	-4643239	3492448	6	6	6	4	5	4	0	2	4
CDIF630erm_02184	CDIF630erm_02184	ABC-type transport system, extracellular solute-binding protein	Unknown	Transport and binding proteins	Anions	x		x		30.6248	30.7491	31.8111	31.0016	31.0912	31.4758	30.112	30.193	29.3122	56420200	69665730	110759000	64645000	95210470	135071900	34083070	38423880	18152040	21	22	22	20	18	17	9	8	11
CDIF630erm_02185	CDIF630erm_02185	ABC-type transport system, permease	CytoplasmicMembrane	Transport and binding proteins	Anions					NaN	23.1416	NaN	23.2953	24.1507	NaN	NaN	NaN	NaN	-6745800	-6569428	-6390065	-6302494	-3820367	-4978675	-5713621	-5848637	-5912021	0	2	2	2	2	1	0	0	0
CDIF630erm_02193	CDIF630erm_02193	putative hydrolase, NUDIX family	Unknown	DNA metabolism	DNA replication, recombination, and repair					25.0476	24.8287	24.6503	NaN	24.7245	24.4129	24.6763	25.115	24.6696	-3333600	-4077805	-5979364	-6677498	-5755186	-5434977	-2464065	-3873175	183160	5	4	4	1	2	2	2	2	3
CDIF630erm_02195	MiaB	tRNA-2-methylthio-N(6)-dimethylallyladenosine synthase	Cytoplasmic	Protein synthesis	tRNA and rRNA base modification	x	x			28.7038	28.9199	28.9117	29.3431	29.1186	29.1507	29.3037	29.1823	29.8021	-209300	9902054	6717621	19237940	13904500	11562820	2348569	9327640	21873120	16	17	20	19	18	11	6	9	16
CDIF630erm_02209	CDIF630erm_02209	uncharacterized protein, AhpD-like	Unknown	Unknown function	Unknown function					27.5245	27.5868	27.6712	28.252	27.2374	27.8865	NaN	27.8549	NaN	-2395500	-2917634	-3195432	1480903	-2508944	2782334	-3955013	-2676072	-5795422	5	5	6	6	6	5	1	2	1
CDIF630erm_02214	CDIF630erm_02214	transcriptional regulator, AraC family	Cytoplasmic	Regulatory functions	DNA interactions					24.371	24.5011	24.3877	24.5626	24.9643	NaN	NaN	NaN	24.8762	-6385450	-6041719	-5624373	-5394519	-5441396	-5098900	-5495340	-5686453	-4842525	3	3	5	4	2	2	1	1	3
CDIF630erm_02215	CDIF630erm_02215	putative proline iminopeptidase (PIP), S33 family	Cytoplasmic	Energy metabolism	Amino acids and amines					28.3205	27.8773	28.8017	28.3511	28.2065	28.3804	29.4467	28.3047	28.5257	15662200	6205367	15365820	9624679	9994174	12243100	20568140	10151970	1484147	9	9	9	8	6	8	3	4	2
CDIF630erm_02231	HydD	putative hydrolase	Cytoplasmic	Unknown function	Unknown function					26.2326	26.6644	26.6281	26.2504	26.7079	25.785	25.445	26.7205	NaN	10800	-2494806	-575695	-1709541	-65140.3	-5678816	-2974596	-4379476	-4098954	6	5	6	4	3	2	2	2	1
CDIF630erm_02233	IlvD	dihydroxy-acid dehydratase	Cytoplasmic	Amino acid biosynthesis	Pyruvate family					23.1141	23.2764	23.7494	NaN	NaN	NaN	NaN	NaN	NaN	-6598420	-6077405	-5980697	-6383048	-6577091	-6456996	-5327746	-5848637	-5912021	2	3	3	1	0	0	1	0	0
CDIF630erm_02241	ClpB	chaperone protein	Cytoplasmic	Protein fate	Protein folding and stabilization	x	x	x		28.6986	28.6847	28.6507	28.1068	27.8559	28.3438	29.3698	29.5359	29.1357	-3786600	-1447561	-3786175	-486684	-3577606	-4956845	-1556384	14754980	-1164636	22	26	20	22	13	11	9	20	13
CDIF630erm_02242	CDIF630erm_02242	hypothetical protein	Cytoplasmic	Unknown function	Unknown function		x			27.2049	27.7794	27.1708	26.3544	26.8744	26.3514	27.4015	NaN	27.0394	6538200	6030356	-2092679	-4135741	689445	-1046412	-1174838	-4099078	8022979	7	6	5	5	5	4	4	1	5
CDIF630erm_02245	CDIF630erm_02245	ABC-type transport system, multidrug-family ATP-binding protein	CytoplasmicMembrane	Cellular processes	Toxin production and resistance		x	x		28.2642	27.8253	28.0823	28.3335	28.3731	29.4129	28.0559	26.6327	28.1086	13541200	8468948	9027502	1052283	15807920	16244060	26162120	-1275596	11499040	11	13	12	10	9	6	8	5	5
CDIF630erm_02248	CDIF630erm_02248	N-carbamoyl-L-amino acid hydrolase	Cytoplasmic	Central intermediary metabolism	Nitrogen metabolism		x	x		27.0227	26.9269	27.8156	26.7398	26.72	26.6276	28.2475	27.4992	27.529	-11500	1974896	2227698	-275589	-1763050	239338	-2782817	2121211	-851762	12	10	9	7	6	6	4	4	4
CDIF630erm_02249	RacX	putative aspartate racemase RacX	Unknown	Energy metabolism	Amino acids and amines					25.0102	24.9403	23.9023	23.8004	23.9903	24.1669	NaN	NaN	25.2203	-4963300	-5463921	-5663484	-6264443	-5720126	-5210435	-5713621	-5848637	-64086.9	3	2	3	2	3	3	0	0	3
CDIF630erm_02250	CDIF630erm_02250	putative lipoprotein	Unknown	Unknown function	Unknown function	x		x		29.3937	29.9054	30.8513	30.4618	30.5298	29.4887	24.3284	27.3554	27.8085	78362200	127902200	86789770	42555140	37617050	21141610	-5292813	1505460	48851120	10	11	12	12	11	7	2	2	7
CDIF630erm_02268	CDIF630erm_02268	hypothetical protein	Cytoplasmic	Unknown function	Unknown function				x	26.6346	26.2386	26.258	23.3543	NaN	NaN	NaN	NaN	NaN	-2701000	-4214350	-4524413	-4598034	-6510665	-6456996	-5713621	-5848637	-5912021	2	2	2	2	1	0	0	0	0
CDIF630erm_02270	CDIF630erm_02270	transcriptional regulator, RpiR family	CytoplasmicMembrane	Regulatory functions	DNA interactions	x	x	x		25.311	26.1418	26.1777	28.3476	28.4653	28.5711	27.7012	26.7142	25.5755	-4560200	-5198489	-4075006	2408073	11414900	7974064	21172120	-80147	-1087408	6	4	4	9	9	8	6	2	4
CDIF630erm_02274	CDIF630erm_02274	putative lipoprotein	Unknown	Cell envelope	Surface structures	x		x		29.7148	29.7596	30.4185	29.8659	29.8985	30.047	27.3227	28.1152	NaN	30207200	28439150	50804260	26634370	8401215	9805626	-2805594	3994618	-5345652	12	12	12	13	11	9	3	2	1
CDIF630erm_02275	LysA	diaminopimelate decarboxylase	Cytoplasmic	Amino acid biosynthesis	Aspartate family	x	x			25.3841	24.9358	25.3608	26.7294	26.8957	26.9152	25.7747	27.2774	26.2832	-4787400	-5390574	-5092933	-757332	-3127778	-893221	-3439070	-3422791	-4089683	7	7	7	8	7	5	3	2	3
CDIF630erm_02276	LysC	aspartokinase	Cytoplasmic	Amino acid biosynthesis	Aspartate family					28.7021	28.2758	28.5364	28.2944	28.1822	28.0909	27.6689	28.4743	28.5043	2998000	-302890	403135	2568389	1809395	2365521	-104321	1146340	2358687	16	11	13	10	12	11	4	5	4
CDIF630erm_02279	CDIF630erm_02279	putative membrane protein	CytoplasmicMembrane	Unknown function	Unknown function			x		31.0438	31.5612	32.1623	32.4653	32.033	32.0648	31.7047	31.2763	31.8016	23903200	51203750	84105450	117791900	80456190	99241320	31116320	43904670	38754380	22	20	22	23	21	20	10	11	11
CDIF630erm_02281	CDIF630erm_02281	hypothetical protein	Unknown	Unknown function	Unknown function			x		31.3448	31.9713	32.5404	31.9686	32.157	32.5831	31.4199	31.1972	31.0151	120864200	123923200	109237000	117382800	265660800	192541500	108509300	32336660	140005900	16	16	17	16	18	13	10	9	9
CDIF630erm_02282	GlnS	glutamine-tRNA ligase	Cytoplasmic	Protein synthesis	tRNA aminoacylation	x	x	x		28.4118	28.6732	29.2159	28.1845	27.7945	28.3491	30.2995	29.905	29.8049	330100	10387460	7657621	7019184	159887	4299312	11557040	21582670	14855600	16	19	19	17	14	8	6	8	9
CDIF630erm_02285	CDIF630erm_02285	hypothetical protein	CytoplasmicMembrane	Unknown function	Unknown function	x	x	x		25.79	26.7104	28.3123	28.9628	29.2253	29.4684	28.7666	27.2901	27.9117	-5639400	-4170803	3288298	14922250	17402360	21350020	27442820	3996743	517839	3	4	6	7	7	6	5	3	3
CDIF630erm_02291	CDIF630erm_02291	ABC-type transport system, ATP-binding protein	Cytoplasmic	Transport and binding proteins	Amino acids, peptides and amines	x		x		28.9329	28.6709	29.0414	28.813	28.7388	29.0368	30.3963	29.588	29.5585	3972200	11525860	11395250	12769160	8101103	17225770	16275650	21543440	17562800	18	17	18	17	18	15	10	11	11
CDIF630erm_02292	CDIF630erm_02292	putative molybdopterin cofactor biosynthesis protein	Cytoplasmic	Biosynthesis of cofactors, prosthetic	Molybdopterin					26.9093	26.3218	26.0026	25.6662	26.2298	26.2429	25.6486	NaN	NaN	854200	-2222546	-4381680	-3049855	-3497222	-4523374	-3294355	-2707991	-3778249	9	9	7	8	4	4	2	1	1
CDIF630erm_02293	CDIF630erm_02293	putative molybdopterin-guanine dinucleotide biosynthesis protein	Unknown	Unknown function	Unknown function					NaN	NaN	NaN	26.0233	27.06	NaN	NaN	NaN	NaN	-4455400	-4878715	-4451332	-2855549	-1987064	-2337634	-3847923	-3170701	-973005	2	1	2	4	2	1	1	1	1
CDIF630erm_02296	XdhA1	xanthine dehydrogenase, molybdenum binding subunit	CytoplasmicMembrane	Energy metabolism	Aerobic					NaN	NaN	NaN	25.4996	NaN	23.7994	NaN	NaN	NaN	-6733092	-6758146	-6722046	-6294822	-6577091	-6301560	-5713621	-5620979	-5912021	1	0	0	3	0	3	0	1	0
CDIF630erm_02310	XdhA3	xanthine dehydrogenase, molybdenum binding subunit	CytoplasmicMembrane	Energy metabolism	Aerobic	x	x			25.5847	25.8959	24.776	27.2601	26.4923	NaN	27.2341	27.6047	27.3267	-6596150	-6485674	-6680400	-5252923	-4440336	-5788612	-3250688	-352973	2108411	4	4	2	6	5	2	5	6	7
CDIF630erm_02311	XdhC2	xanthine dehydrogenase iron-sulfur binding subunit XdhC2	Cytoplasmic	Energy metabolism	Aerobic					27.6854	26.7732	NaN	NaN	26.1501	26.9077	NaN	NaN	27.2864	3586200	643247	-4535461	10148920	7452093	10681150	-5473922	-3592288	42486730	2	2	1	1	2	2	1	1	2
CDIF630erm_02315	CDIF630erm_02315	transcriptional regulator, sigma-54-dependent	Cytoplasmic	Signal transduction	Two-component systems	x				29.4171	28.3612	28.0372	29.2799	29.6066	29.5576	30.045	29.6008	30.1034	28017200	9282087	2919690	20891050	35913210	32492080	39678200	91551410	25585180	16	17	13	13	13	11	8	9	9
CDIF630erm_02317	CDIF630erm_02317	putative restriction enzyme	Cytoplasmic	DNA metabolism	Restriction/modification		x			23.3373	NaN	22.851	25.6493	25.0643	NaN	NaN	NaN	NaN	-6627790	-6645072	-6642984	-5499876	-6017499	-5690305	-5713621	-5848637	-5912021	5	3	3	5	6	2	0	0	0
CDIF630erm_02318	CDIF630erm_02318	putative cell division GTPase	Cytoplasmic	Cellular processes	Cell division					24.0473	24.1675	23.9339	NaN	NaN	NaN	NaN	NaN	25.5972	-5346300	-5892995	-5873140	-6601271	-6577091	-6170214	-5713621	-5848637	-1370759	4	4	4	1	0	1	0	0	2
CDIF630erm_02322	XdhA4	xanthine dehydrogenase, molybdenum binding subunit	CytoplasmicMembrane	Energy metabolism	Aerobic	x		x		29.772	29.729	29.205	29.5829	29.4145	29.5938	30.0192	30.5147	30.0512	-328700	3266508	-2087663	12104580	7839429	2633159	5597672	19993850	7529942	17	18	20	24	21	15	10	15	15
CDIF630erm_02323	XdhC3	xanthine dehydrogenase, iron-sulfur binding subunit	Cytoplasmic	Energy metabolism	Aerobic					26.3748	26.8258	26.8199	27.2615	26.0925	27.3948	NaN	27.905	NaN	1997200	-4325155	-4196469	-3969057	-6059168	-3545839	-5388250	1574930	-5474528	5	4	5	4	3	4	1	2	1
CDIF630erm_02324	XdhB3	xanthine dehydrogenase, FAD-binding subunit	Cytoplasmic	Purines, pyrimidines, nucleosides, and nucleotides	Other	x		x		26.5528	26.6799	25.874	26.5988	26.6776	26.7919	27.0858	27.7374	27.9492	-1281300	-2569075	-3228322	-3954295	1689941	522551	12195650	214949	25659580	8	7	8	8	8	7	5	4	7
CDIF630erm_02325	NhaP1	k(+)/h(+) antiporter	CytoplasmicMembrane	Transport and binding proteins	Cations and iron carrying compounds		x		x	25.1241	25.3365	25.3926	25.5567	25.6905	NaN	NaN	NaN	NaN	-5330200	-4360490	-5255793	-5310448	-6101576	-5394499	-5713621	-5848637	-5912021	2	3	2	2	2	1	0	0	0
CDIF630erm_02328	CDIF630erm_02328	ABC-type transport system, permease	CytoplasmicMembrane	Transport and binding proteins	Unknown substrate				x	27.5537	27.0632	26.6729	27.3194	27.1185	27.1934	NaN	NaN	NaN	-5099300	-3635971	-2229761	-2722886	-5375024	-72176.5	-5713621	-5848637	-5912021	3	4	4	4	2	3	0	0	0
CDIF630erm_02329	CDIF630erm_02329	ABC-type transport system, multidrug-family ATP-binding protein	CytoplasmicMembrane	Cellular processes	Toxin production and resistance	x	x	x		27.5276	27.2651	27.668	27.7163	27.9215	28.4106	26.7152	24.9198	NaN	14500200	5535043	10996980	2765811	21817550	24741560	10077700	-2008569	-5912021	8	8	7	6	4	2	2	3	0
CDIF630erm_02330	CDIF630erm_02330	putative ATP-dependent RNA helicase	Cytoplasmic	DNA metabolism	DNA replication, recombination, and repair		x			27.4927	27.5315	27.4695	27.8344	28.0831	28.1356	28.4568	27.3329	29.1688	841200	-706989	360828	330147	3396145	9332653	6766818	5976071	10355140	15	13	11	10	11	9	8	5	8
CDIF630erm_02331	PbuG	adenine/guanine/hypoxanthine permease	CytoplasmicMembrane	Transport and binding proteins	Nucleosides, purines and pyrimidines	x	x			32.2847	32.0977	32.2325	31.3819	31.4481	32.0158	31.6008	30.7428	30.5968	86924200	144701600	289748100	120879300	93052020	144956900	109548600	67890680	56869740	9	9	9	9	7	8	7	5	5
CDIF630erm_02335	Tal1	transaldolase	Cytoplasmic	Energy metabolism	Pentose phosphate pathway					24.7668	24.9778	24.0385	24.2971	25.1851	24.966	24.6402	NaN	25.3379	-4710000	-4615128	-6115284	-6084094	-5112191	-4246952	-2961383	-3029045	3375201	3	4	2	3	2	3	3	1	2
CDIF630erm_02336	CDIF630erm_02336	transcriptional regulator, DeoR family	Cytoplasmic	Regulatory functions	DNA interactions					25.112	25.7402	24.5333	24.9885	25.2983	NaN	NaN	NaN	24.8115	-4129100	-3442594	-5228999	-6486980	-5064093	-5713372	-4519919	-5848637	-362739	7	7	4	3	2	5	3	0	4
CDIF630erm_02338	CDIF630erm_02338	two-component sensor histidine kinase	Cytoplasmic	Signal transduction	Two-component systems			x		29.8958	29.8009	31.178	31.1275	31.0676	31.4136	30.0117	29.786	30.5122	20178200	19212290	36660980	31813960	46782290	85659820	28993750	18996750	30605740	20	22	22	19	17	16	7	7	9
CDIF630erm_02339	CDIF630erm_02339	two-component response regulator	Cytoplasmic	Signal transduction	Two-component systems	x	x	x		27.6625	28.4608	27.7717	23.8775	23.7577	23.6443	27.9411	26.5216	27.9006	17527200	17202150	14246860	-5804608	-5357130	-5270768	41005100	766460	21940010	10	10	11	2	2	2	7	3	5
CDIF630erm_02340	CDIF630erm_02340	putative copper-transporting P-type ATPase	CytoplasmicMembrane	Transport and binding proteins	Cations and iron carrying compounds	x	x			31.0503	30.7357	30.937	30.021	29.3804	30.1799	29.9054	29.9321	29.8017	4585200	9965620	21287870	4223404	98090.8	1822787	418278	5747555	1968842	23	27	31	18	14	12	8	14	11
CDIF630erm_02343	BipA	GTP-binding protein BipA	CytoplasmicMembrane	Protein synthesis	Translation factors	x	x			30.026	30.3694	30.6474	31.3445	31.584	31.2542	31.4666	31.462	31.2706	11477200	28625720	18759640	67661030	65086910	52909310	30698270	74883470	47223200	22	21	19	23	21	15	12	13	13
CDIF630erm_02344	TrxB2	thioredoxin reductase	Cytoplasmic	Energy metabolism	Electron transport	x	x			26.3137	26.529	26.908	24.7739	25.6936	NaN	27.4722	NaN	NaN	3945200	-2656261	-1168723	-6354108	-5487694	-5871660	13457880	2429005	-3239271	5	4	3	3	2	2	3	1	1
CDIF630erm_02347	ThrC	threonine synthase	Cytoplasmic	Amino acid biosynthesis	Aspartate family					27.915	27.7682	28.0119	28.0976	27.8037	27.5512	27.7081	27.9297	28.0517	-2019800	462127	-152384	1786788	-833853	876184	-3023422	274285	685442	15	17	15	18	12	10	5	8	8
CDIF630erm_02348	ThrB	homoserine kinase	Cytoplasmic	Amino acid biosynthesis	Serine family					30.0598	28.9238	29.09	29.287	29.5201	29.2043	30.2219	29.2824	29.0649	104794200	33981710	20467010	23506540	36897810	28642050	118969700	26489720	18674390	7	8	6	6	5	5	4	2	3
CDIF630erm_02349	CDIF630erm_02349	uncharacterized protein, aldolase-type	Cytoplasmic	Central intermediary metabolism	Nitrogen metabolism	x	x	x		30.5506	30.1315	29.4175	28.4617	28.5531	28.7371	29.9919	30.104	29.9987	68604200	35276950	21227570	2502740	9173671	8041631	36251830	25919250	20940400	19	17	18	10	11	10	8	10	10
CDIF630erm_02351	CorA	magnesium transport protein CorA	CytoplasmicMembrane	Transport and binding proteins	Cations and iron carrying compounds					27.1002	27.5664	27.4931	26.8776	27.3224	27.7664	NaN	NaN	NaN	-845600	-1205563	1618376	3838550	3602379	17197250	-4377079	-5848637	-4144949	6	6	7	7	5	6	1	0	1
CDIF630erm_02352	CDIF630erm_02352	putative multiprotein-complex assembly TPR repeat-containing protein	Cytoplasmic	Unknown function	Unknown function					26.3174	26.4349	27.0066	27.0947	26.7595	26.9526	26.8987	27.8966	27.0628	-6370720	-5853619	-5888378	-224906	-2872613	-1803234	-4060969	727230	-3229370	8	6	5	11	9	8	4	5	4
CDIF630erm_02357	CDIF630erm_02357	putative membrane protein	CytoplasmicMembrane	Cell envelope	Other					24.346	24.9367	24.857	NaN	NaN	NaN	NaN	NaN	NaN	-5905100	-5426187	-4904802	-5938792	-5269361	-4390893	-3884668	-5848637	-5912021	2	2	3	2	2	2	1	0	0
CDIF630erm_02359	IspG	4-hydroxy-3-methylbut-2-en-1-yl diphosphate synthase	Cytoplasmic	Biosynthesis of cofactors, prosthetic groups, and carriers	Other	x	x	x		29.3635	29.453	29.2677	28.5644	28.5931	28.4313	29.1441	29.6799	29.5784	19775200	16384050	10023430	6850781	8997743	4641099	17805800	21585940	10170250	17	17	16	14	12	11	11	11	10
CDIF630erm_02360	CDIF630erm_02360	putative membrane-associated peptidase, M50 family	CytoplasmicMembrane	Protein fate	Degradation of proteins, peptides, and glycopeptides			x		31.0612	30.9502	31.6738	31.4278	31.4537	31.623	31.0371	30.2738	30.454	58005200	70730650	121564400	70700860	72095930	76790480	123000000	25502420	70785270	11	13	13	11	11	11	11	10	11
CDIF630erm_02361	Dxr	1-deoxy-D-xylulose 5-phosphate reductoisomerase	Cytoplasmic	Biosynthesis of cofactors, prosthetic groups, and carriers	Other		x			26.218	25.5492	26.0152	26.5918	27.1535	26.6874	NaN	NaN	NaN	-4720100	-4576287	-6312844	-3309416	-204605	-4369269	-5713621	-5330896	-4727222	7	5	3	8	6	3	0	1	1
CDIF630erm_02363	CDIF630erm_02363	hypothetical protein	Unknown	Unknown function	Unknown function	x				25.7494	25.8524	25.2972	25.6313	25.2793	25.4778	25.9906	NaN	27.3896	836100	-559096	-1989312	-5149276	1484372	-603042	10729030	-2975925	22524740	3	3	3	4	4	4	2	1	2
CDIF630erm_02366	UppS1	undecaprenyl pyrophosphate synthetase	Cytoplasmic	Cell envelope	Biosynthesis and degradation of surface polysaccharides and lipopolysaccharides	x	x	x		27.4732	27.5907	26.7628	26.5441	26.6348	25.6807	28.0584	27.0767	28.256	9562200	6046867	315116	-136211	1436472	-3199333	22584470	422215	33300160	8	7	6	4	3	4	5	2	6
CDIF630erm_02369	PyrH	uridylate kinase	Cytoplasmic	Purines, pyrimidines, nucleosides, and nucleotides	Nucleotide and nucleoside interconversions					31.2319	30.6824	29.584	29.7717	30.4027	30.0974	30.201	29.6963	30.538	110224200	54094720	17925160	29090010	78342100	38051040	107369500	6828184	106342600	15	15	13	12	13	8	8	4	9
CDIF630erm_02370	Tsf	elongation factor ts (EF-ts)	Cytoplasmic	Protein synthesis	Translation factors	x	x	x		30.1948	30.0093	30.2784	28.8756	28.4334	29.1822	30.6081	30.0065	30.2934	47505200	55983520	45766280	12782960	10300200	15817600	74510060	85877740	72949820	19	20	17	9	10	10	10	10	12
CDIF630erm_02371	RpsB	30S ribosomal protein S2	Cytoplasmic	Protein synthesis	Ribosomal proteins: synthesis and modification					34.8772	35.1251	34.6033	35.0688	35.5023	34.1272	35.294	34.3284	36.0025	1795854000	1408485000	839927700	1349967000	2388148000	1380172000	4408270000	1622463000	4580761000	20	24	18	22	22	23	20	17	24
CDIF630erm_02376	CDIF630erm_02376	DNA mismatch repair protein, MutS2-like	Cytoplasmic	DNA metabolism	DNA replication, recombination, and repair		x			24.6144	25.5813	NaN	26.9038	NaN	25.6182	NaN	NaN	NaN	-6432700	-6322319	-6612857	-4288550	-6153158	-5996333	-5511510	-4137521	-5165390	5	3	1	6	1	3	1	2	2
CDIF630erm_02378	CDIF630erm_02378	putative serine/threonine protein kinase	Cytoplasmic	Protein fate	Protein modification and repair		x			28.225	27.8525	28.5316	27.3583	27.3235	27.4069	28.4002	NaN	NaN	4207200	1247199	9699070	-2292016	-293700	185372	6793379	-1512542	-4495177	9	8	9	7	5	5	2	1	1
CDIF630erm_02379	CDIF630erm_02379	putative vancomycin resistance protein, vanW family	Unknown	Cellular processes	Toxin production and resistance	x	x	x		31.3235	31.793	32.2764	29.9076	29.76	29.8908	29.3713	27.6305	28.7765	82452200	101369900	126777500	13155440	24684140	16837910	29019160	1826984	10048490	21	24	22	16	14	9	7	3	8
CDIF630erm_02385	CDIF630erm_02385	putative ATP/GTP-binding protein	Cytoplasmic	Protein fate	Protein modification and repair					30.6614	29.5665	30.243	29.7495	29.8563	29.5543	29.638	29.619	29.991	42972200	29530490	25997110	15978340	17548720	16991260	17550580	34670860	27610690	19	19	16	14	11	13	7	8	7
CDIF630erm_02386	BioB2	biotin synthase	Cytoplasmic	Protein fate	Protein modification and repair	x	x	x		26.9155	26.4049	26.4193	25.2376	25.4698	25.0613	26.6799	26.5808	26.5317	-1158100	-2647681	-2595229	-5429680	-3804555	-5002390	-332846	-775842	-4085723	3	3	4	3	4	2	2	3	3
CDIF630erm_02387	ThiH2	2-iminoacetate synthase	Cytoplasmic	Protein fate	Protein modification and repair	x	x			30.1724	30.5176	30.2063	29.5917	29.5822	29.4581	29.4364	29.9191	30.0127	31621200	56541580	41932370	21797290	15635690	19948210	12626400	24619740	16064900	27	26	27	18	17	12	9	11	11
CDIF630erm_02389	CDIF630erm_02389	isoleucine 2-epimerase	Cytoplasmic	Amino acid biosynthesis	Glutamate family					26.7192	26.4016	26.1852	26.0041	26.4558	26.1704	26.8069	NaN	NaN	-2990800	-2902965	-3296641	-3942195	-4041352	-5402071	419433	-435217	-2545566	7	5	8	5	4	4	3	1	1
CDIF630erm_02393	CDIF630erm_02393	putative GCN5-related N-acetyltransferase-like protein	Cytoplasmic	Unknown function	Unknown function					NaN	NaN	25.6017	25.8586	26.5273	25.0148	NaN	NaN	25.9211	-5860350	-5950603	-5348557	-3443346	-3295078	-5540915	-5405415	-5848637	4268831	1	2	3	4	4	2	1	0	2
CDIF630erm_02394	CDIF630erm_02394	putative threonyl/alanyl-tRNA synthetase	Cytoplasmic	Protein synthesis	tRNA aminoacylation					28.3736	27.9134	27.4381	27.7193	28.0446	27.145	NaN	25.6037	27.2868	-40500	-768250	-2772312	-1897892	-1181521	-2349713	-3627704	-4758381	-3392648	6	4	3	6	6	3	1	2	2
CDIF630erm_02396	Ldh	L-lactate dehydrogenase	Cytoplasmic	Energy metabolism	Glycolysis/gluconeogenesis	x		x		25.6468	24.9142	24.1511	25.6962	25.8345	25.0711	26.4554	26.6065	26.0784	-3630000	-6149451	-5851234	-2997272	-3012362	-2664638	-1467667	2539667	-3002275	4	3	4	4	4	4	2	3	3
CDIF630erm_02400	Hcp	hydroxylamine reductase	Cytoplasmic	Energy metabolism	Amino acids and amines	x	x			27.6982	28.4614	29.9507	26.518	26.9495	26.2213	26.8168	25.0805	25.415	-2296400	7427139	12948950	-3057838	-4482753	-4471848	-4165920	-4702604	-4493197	9	14	13	7	6	4	3	2	3
CDIF630erm_02401	CDIF630erm_02401	putative iron-sulfur binding protein	Unknown	Energy metabolism	Electron transport					24.5329	25.4292	25.5241	NaN	NaN	NaN	NaN	NaN	NaN	-5421000	-5435505	-4464539	-6452142	-5543745	-6373083	-5713621	-5848637	-5343051	5	3	5	2	2	1	0	0	1
CDIF630erm_02403	CDIF630erm_02403	putative sodium:dicarboxylate symporter	CytoplasmicMembrane	n.d.	n.d.	x	x	x		30.4291	30.2435	30.6327	31.354	30.8603	31.4363	29.7657	29.744	28.9524	13245200	19402990	47025780	94995660	77662050	109604600	17569060	54254910	12679780	4	3	3	3	4	4	3	2	2
CDIF630erm_02404	CDIF630erm_02404	ABC-type transport system, cystine/aminoacid-family ATP-binding protein	CytoplasmicMembrane	Transport and binding proteins	Amino acids, peptides and amines		x			29.8536	29.9932	30.2823	29.4534	29.8184	29.3433	29.5314	29.6446	31.7199	89616200	114223300	177079400	29519580	73404300	28782450	215420800	60345400	772198500	15	16	16	10	12	7	8	3	12
CDIF630erm_02405	CDIF630erm_02405	putative peptidase, M20D family	Cytoplasmic	Protein fate	Degradation of proteins, peptides, and glycopeptides					26.6429	26.3564	26.9854	27.0566	27.1539	26.9623	26.155	27.5965	27.876	-2935000	-1748053	-3067811	910520	-125925	1316.25	-2858195	4203682	1814993	7	7	6	6	5	4	3	5	4
CDIF630erm_02406	CDIF630erm_02406	ABC-type transport system, cystine/aminoacid-family extracellular solute-binding protein	Unknown	Transport and binding proteins	Amino acids, peptides and amines	x		x		33.2727	33.7063	34.5978	33.6708	33.7379	33.8311	32.9312	32.3585	33.15	528424200	618435600	1012950000	372808800	854767400	716124000	1117120000	346418700	959191800	24	27	25	21	22	18	17	17	19
CDIF630erm_02407	CDIF630erm_02407	ABC-type transport system, cystine/aminoacid-family permease	CytoplasmicMembrane	Transport and binding proteins	Amino acids, peptides and amines		x		x	28.3927	28.1998	28.6981	29.1263	28.7704	29.4068	NaN	NaN	NaN	-1583500	4980292	15612370	17682350	7698244	11859640	-5713621	-5848637	-5912021	3	6	6	6	4	3	0	0	0
CDIF630erm_02408	CDIF630erm_02408	ABC-type transport system, cystine/aminoacid-family permease	CytoplasmicMembrane	Transport and binding proteins	Amino acids, peptides and amines					25.5468	NaN	24.919	25.2033	NaN	26.8531	NaN	NaN	NaN	-6393000	-6039292	-5457321	-3953155	-5906164	-1615869	-5254697	-5848637	-5846441	2	1	2	2	1	2	1	0	1
CDIF630erm_02409	CDIF630erm_02409	ABC-type transport system, cystine/aminoacid-family extracellular solute-binding protein	Unknown	Transport and binding proteins	Amino acids, peptides and amines					34.4492	35.1463	35.4993	35.5743	34.6904	34.6251	34.5416	34.0851	34.7572	850784200	1052437000	1399503000	1125334000	915011600	924135400	1740160000	650616400	1456889000	35	38	29	33	28	24	26	22	30
CDIF630erm_02411	CDIF630erm_02411	putative molybdopterin oxidoreductase	Cytoplasmic	Energy metabolism	Anaerobic	x	x	x		25.9041	26.1623	26.4199	28.8341	29.1236	28.8386	28.2467	27.8353	28.3204	-6650318	-6252450	-6165254	5615348	5232298	2699191	-2544854	1364231	-1246545	3	5	4	18	16	10	4	6	8
CDIF630erm_02413	CDIF630erm_02413	putative alpha/beta hydrolase	Cytoplasmic	Unknown function	Unknown function	x	x	x		30.0554	30.2936	29.7485	28.878	29.3639	29.2761	30.4533	29.7643	31.1363	53957200	53375700	35777380	22269200	40839190	32301220	156501500	22932840	229804800	8	8	8	6	6	4	4	2	5
CDIF630erm_02419	CDIF630erm_02419	putative phage-related cell wall hydrolase	Extracellular	Mobile and extrachromosomal element functions	Prophage functions	x		x		30.4506	30.9408	31.6823	30.7352	30.7111	30.8576	29.8542	29.6557	29.3745	48976200	57727840	83575400	38200440	59244330	62708800	34432980	24650800	11854540	20	23	22	21	21	17	6	9	9
CDIF630erm_02420	MapA	maltose phosphorylase	Cytoplasmic	Energy metabolism	Sugars					NaN	NaN	NaN	25.5979	25.3801	NaN	NaN	NaN	NaN	-6704839	-6678393	-6703426	-5690128	-6091814	-6456996	-5713621	-5539861	-5912021	1	3	1	3	3	0	0	1	0
CDIF630erm_02422	CDIF630erm_02422	glucan 1,4-alpha-maltohydrolase	Cytoplasmic	Energy metabolism	Sugars					NaN	NaN	NaN	NaN	25.3465	25.423	NaN	NaN	NaN	-6745800	-6734629	-6633613	-4713718	-5913739	-4473380	-5282910	-5624907	-5338281	0	1	1	5	2	3	1	1	2
CDIF630erm_02425	CDIF630erm_02425	cell wall hydrolase	Cellwall	n.d.	n.d.					27.1746	26.8514	28.1864	NaN	NaN	NaN	25.9957	NaN	26.9852	759900	1090019	3638428	-6641138	-6577091	-6456996	-3169018	-5680135	-4913993	10	13	12	1	0	0	3	1	2
CDIF630erm_02426	CDIF630erm_02426	putative ROK protein	Cytoplasmic	Regulatory functions	DNA interactions					NaN	NaN	NaN	25.4954	25.3056	NaN	NaN	NaN	NaN	-6627680	-6758146	-6722046	-5168409	-4011811	-5661817	-5713621	-4881933	-5881882	2	0	0	4	4	1	0	1	1
CDIF630erm_02427	FtnA	bacterial non-heme ferritin	Cytoplasmic	Transport and binding proteins	Cations and iron carrying compounds		x			28.0787	28.1306	28.1066	28.8336	28.6085	28.9127	27.6781	29.325	29.1494	3565200	2061246	3697755	19637070	12355890	1851964	3235476	21943920	1296478	5	5	5	5	5	3	3	3	3
CDIF630erm_02437	CDIF630erm_02437	putative esterase	Extracellular	Unknown function	Enzymes of unknown specificity					24.6512	24.7031	25.1686	24.9535	26.0726	25.7933	26.601	NaN	NaN	-4604400	-5309478	-3943512	-4628887	-1089870	-4882135	6429609	-1224572	-5340918	5	6	6	4	3	2	3	1	1
CDIF630erm_02438	CDIF630erm_02438	putative membrane protein	CytoplasmicMembrane	Hypothetical proteins	Domain		x			28.2626	28.49	28.4265	28.7857	28.8251	28.8388	28.9964	25.1346	25.685	-2172900	8051234	12364430	13825720	15844140	14276490	20599320	-517461	-2274727	4	5	5	4	4	4	3	3	3
CDIF630erm_02439	AldH	aldehyde dehydrogenase	Cytoplasmic	Energy metabolism	Other					27.7349	28.1951	27.0493	28.4014	27.8096	28.1348	NaN	NaN	NaN	-3733200	5584574	-4688924	-2054883	-2994467	-3285355	-5713621	-5458595	-5822659	5	4	5	10	6	3	0	1	1
CDIF630erm_02440	CDIF630erm_02440	flavodoxin	Unknown	Energy metabolism	Electron transport					25.1725	24.4002	25.5787	28.1968	26.5387	25.1213	NaN	26.5914	NaN	-5820970	-6474243	-5086456	8916338	-224772	-2852591	-5713621	640106	-5384258	4	2	2	5	2	2	0	2	1
CDIF630erm_02442	CDIF630erm_02442	putative GTP-binding protein, HflX type	Cytoplasmic	Unknown function	Unknown function	x		x		27.3919	27.3343	26.9693	27.4055	27.4432	27.0695	NaN	28.07	27.719	-3187400	-4198020	-5210840	3257225	1553412	588364	-4563183	119489	-1345106	7	7	8	8	8	6	1	3	4
CDIF630erm_02443	CDIF630erm_02443	ABC-type transport system, multidrug-family ATP-binding/permease	CytoplasmicMembrane	Cellular processes	Toxin production and resistance	x	x	x		33.3215	33.4159	33.9106	33.246	33.1276	33.2113	32.9985	32.8861	32.5503	82805200	198748500	329118200	188045600	130898700	207448100	95607570	120021100	104907100	27	29	30	29	22	22	16	16	16
CDIF630erm_02444	CDIF630erm_02444	ABC-type transport system, multidrug-family ATP-binding/permease	CytoplasmicMembrane	Cellular processes	Toxin production and resistance	x	x	x		34.0106	33.961	33.9545	33.1073	33.1605	33.3492	32.9658	32.5344	32.7288	71756200	119060800	216468900	88892220	63527210	96670250	38537230	90013260	41885470	45	50	49	43	34	34	20	24	20
CDIF630erm_02446	CynT	carbonic anhydrase	Cytoplasmic	Unknown function	Unknown function		x			28.6108	28.5035	28.6478	26.8046	27.0196	24.3983	NaN	NaN	26.6072	17634200	12913560	4634838	-1396509	-4061235	-5862969	-4389285	-5848637	2758904	6	6	5	8	5	2	1	0	4
CDIF630erm_02449	CDIF630erm_02449	uncharacterized protein	Cytoplasmic	Unknown function	Unknown function					28.6663	28.2385	27.504	28.5856	29.028	27.9041	28.4019	28.4518	29.2253	17061200	6216924	4656721	7121463	28634380	13755040	34383320	653674	41306000	11	10	10	9	13	6	4	3	8
CDIF630erm_02453	CDIF630erm_02453	putative cyclic nucleotides-binding protein	CytoplasmicMembrane	Transport and binding proteins	Nucleosides, purines and pyrimidines			x		25.4887	26.4968	24.1824	26.2098	25.8601	25.6783	26.2328	26.748	26.9303	-1549300	-4560879	-6033778	-4496224	-2125014	-3180773	3379367	-2200316	15189310	7	6	3	3	4	2	3	2	3
CDIF630erm_02461	CDIF630erm_02461	uncharacterized protein	Unknown	Unknown function	Unknown function					30.0961	30.3567	30.7883	30.724	30.7287	31.2744	30.7928	30.4444	29.6956	40898200	44082800	89085060	32906200	87818540	101250800	141615800	59366280	25422080	14	15	14	14	14	10	7	8	6
CDIF630erm_02468	CDIF630erm_02468	transcriptional regulator, RpiR family	Cytoplasmic	Regulatory functions	DNA interactions					NaN	NaN	NaN	NaN	NaN	NaN	NaN	23.8803	24.1305	-6745800	-6758146	-6722046	-6478966	-5866237	-3470363	-5713621	-4693331	-3366635	0	0	0	2	2	3	0	2	3
CDIF630erm_02475	CDIF630erm_02475	hypothetical protein	Cytoplasmic	Unknown function	Unknown function					24.0021	24.1193	24.729	NaN	NaN	NaN	NaN	NaN	NaN	-5513600	-5103553	-4766767	-3300230	-5589192	-6456996	-514055	-5848637	-3538464	2	2	2	3	2	0	1	0	1
CDIF630erm_02477	CDIF630erm_02477	putative diguanylate kinase signaling protein	Cytoplasmic	Signal transduction	Other		x			27.0245	26.612	26.9557	25.6877	NaN	25.9717	NaN	NaN	NaN	-5561700	-5324147	-2183157	-6009495	-5976285	-5572378	-5713621	24667150	-5293474	4	5	6	5	1	2	0	1	1
CDIF630erm_02478	AsnC	asparagine-tRNA ligase	Cytoplasmic	Protein synthesis	tRNA aminoacylation	x	x	x		29.2336	29.2122	29.4545	30.0814	30.0847	30.1271	29.9283	29.4946	29.9137	4272200	13627640	13704160	40083320	30186690	39369480	21921600	11152340	18246740	18	20	20	22	20	17	10	8	10
CDIF630erm_02483	CDIF630erm_02483	uncharacterized protein, CoxE-like	Cytoplasmic	Unknown function	Unknown function		x			24.6064	24.7475	NaN	26.1819	26.3855	26.6227	NaN	25.4079	26.3792	-5371100	-5885716	-6553116	-3590581	-3660925	-3354880	-5713621	-3307696	-3892652	7	5	1	7	6	4	0	4	3
CDIF630erm_02484	CDIF630erm_02484	putative ATPase	Cytoplasmic	Protein fate	Protein folding and stabilization	x	x	x		28.1447	28.2086	28.0596	28.5647	28.8812	29.0802	30.1669	29.8288	29.4489	12809200	7614533	3800363	9747413	22474700	24568250	93446900	34538450	36878440	10	9	9	10	11	9	8	6	8
CDIF630erm_02485	CDIF630erm_02485	putative membrane protein	CytoplasmicMembrane	Hypothetical proteins	Domain	x				28.6256	28.8894	28.8236	28.9341	28.7977	29.6598	NaN	NaN	26.5514	1604900	11978240	16031550	20030480	8087798	15722610	-4270744	-366719	3185802	3	5	5	5	4	4	1	1	2
CDIF630erm_02487	Eam	glutamate 2,3-aminomutase	Cytoplasmic	Energy metabolism	Electron transport	x		x		27.2485	26.9155	26.7036	27.126	27.2332	27.0735	25.775	NaN	26.5247	-3511900	-2423120	-3270799	1321538	-1008350	-248346	-3754676	-4399699	-4098054	7	6	6	7	7	6	3	1	3
CDIF630erm_02488	CDIF630erm_02488	transcriptional regulator, GntR family	Cytoplasmic	Regulatory functions	DNA interactions		x			22.5401	23.0291	22.8556	24.7707	23.455	NaN	NaN	NaN	NaN	-6590840	-6384290	-6301593	-5748350	-6363775	-6050804	-5713621	-5637915	-5336453	3	2	3	3	2	2	0	1	1
CDIF630erm_02490	CDIF630erm_02490	hypothetical protein	Unknown	Unknown function	Unknown function	x	x	x		26.7949	27.4779	27.8999	28.7455	28.2109	29.3833	25.8496	26.015	25.9039	-5721700	329053	4213710	12107440	2080161	18201990	-4639228	-2973595	-3596520	6	11	15	15	11	13	2	4	6
CDIF630erm_02492	CDIF630erm_02492	hypothetical protein	Unknown	Unknown function	Unknown function					26.7501	26.1886	26.3162	26.2016	26.1166	26.4942	27.357	27.5912	26.1535	-1731000	-3470733	-3839954	-2732706	-3635361	-1901924	1771618	3312666	-3677349	12	7	7	5	4	4	4	4	2
CDIF630erm_02495	AmpP	xaa-pro aminopeptidase	Cytoplasmic	Protein fate	Degradation of proteins, peptides, and glycopeptides	x	x	x		26.3182	25.9641	27.0909	28.3524	28.4783	27.7874	26.9212	24.7788	26.3199	-6166910	-5853407	-5642087	2860002	949123	-95449.7	-3629340	-5068182	-5001482	8	5	7	15	13	9	5	2	4
CDIF630erm_02496	CDIF630erm_02496	transporter, major facilitator superfamily (MFS)	CytoplasmicMembrane	Transport and binding proteins	Amino acids, peptides and amines					26.1738	25.3047	26.0161	25.5176	NaN	26.3159	NaN	NaN	NaN	-5837020	-5894232	-4009418	-4742481	-6577091	-4646280	-5713621	-5776576	-5912021	2	2	2	3	0	2	0	1	0
CDIF630erm_02497	PrsA1	peptidyl-prolyl cis-trans isomerase, PpiC-type	CytoplasmicMembrane	Protein fate	Protein folding and stabilization			x		34.3514	35.1347	35.8173	35.2493	35.2113	35	33.7066	34.3615	34.0545	504234200	987303700	1484458000	1306629000	1071351000	1205988000	412688100	683226500	489175500	46	50	48	49	48	42	25	33	33
CDIF630erm_02498	CDIF630erm_02498	hypothetical protein	Cytoplasmic	Unknown function	Unknown function					NaN	24.7055	24.8045	NaN	24.6891	NaN	NaN	NaN	NaN	-6614200	-5372676	-5175474	-6170433	-6011667	-5914789	-5713621	-5108698	-5912021	1	3	4	1	2	1	0	1	0
CDIF630erm_02503	FruABC	PTS system, fructose-specific IIABC component	CytoplasmicMembrane	Signal transduction	PTS	x	x	x		32.6946	33.012	33.9627	32.1445	31.6912	31.7462	31.2707	31.2672	31.0594	210424200	359304300	576455400	169388100	145475500	166745200	71046740	69543260	66090140	20	23	25	21	18	17	9	9	7
CDIF630erm_02504	FruK	fructose 1-phosphate kinase	Unknown	Energy metabolism	Sugars		x	x		29.4397	28.9252	30.0256	30.2466	30.2952	30.4097	29.1476	29.501	29.8479	25804200	23787340	27941300	45012210	80995800	73276100	39276320	32263100	15407260	18	18	17	16	16	14	7	8	8
CDIF630erm_02506	CDIF630erm_02506	putative protein-tyrosine phosphatase	Cytoplasmic	Protein fate	Protein modification and repair					24.8188	25.3664	24.489	24.1014	NaN	NaN	NaN	NaN	26.014	-3202200	-3791799	-4315266	-6415942	-6577091	-5733876	-5713621	-3432110	6690426	4	4	3	2	0	1	0	1	2
CDIF630erm_02507	CDIF630erm_02507	putative sporulation integral membrane protein	CytoplasmicMembrane	Cellular processes	Sporulation and germination	x	x	x		25.0796	25.3837	25.8854	26.613	26.224	26.4324	25.2572	25.1426	NaN	-5792640	-4055109	-4182120	-3268553	-445473	1366048	-1598792	-5060353	-4156380	2	2	2	2	2	2	2	2	1
CDIF630erm_02509	TopB	DNA topoisomerase III	Cytoplasmic	DNA metabolism	DNA replication, recombination, and repair					25.5611	26.095	25.9717	26.5733	26.2964	25.5165	NaN	26.1831	25.6009	-6543270	-6235539	-6300717	-3575946	-5202137	-5958212	-5581364	-3672505	-5522522	5	5	5	12	8	5	1	5	4
CDIF630erm_02511	CDIF630erm_02511	sodium:alanine symporter	CytoplasmicMembrane	Transport and binding proteins	Amino acids, peptides and amines					25.112	26.5783	25.8961	24.2985	NaN	24.9548	NaN	NaN	NaN	-6260940	366532	-4324790	-6504637	-6577091	-5798216	1049159	-5848637	-5912021	2	2	2	2	0	2	1	0	0
CDIF630erm_02519	CDIF630erm_02519	hypothetical protein	Unknown	Unknown function	Unknown function					24.8191	24.7556	25.0874	24.8624	NaN	24.4426	NaN	NaN	NaN	-5351600	-6109262	-5070583	-5499750	-6577091	-6117767	-5398959	-5848637	-5912021	6	4	4	3	0	2	1	0	0
CDIF630erm_02520	CDIF630erm_02520	transcriptional regulator, GntR family	Cytoplasmic	Regulatory functions	DNA interactions		x			25.0545	26.0887	25.4309	26.2036	26.2583	26.2142	NaN	25.4547	26.4851	-6197120	-6019133	-5784566	-2426643	-4314979	2174884	-5282306	-4478775	-2514873	6	3	5	9	7	6	1	2	3
CDIF630erm_02523	CDIF630erm_02523	two-component sensor histidine kinase	CytoplasmicMembrane	Signal transduction	Two-component systems	x	x			25.9978	26.3834	26.9722	25.5495	25.2828	25.6397	NaN	24.5703	NaN	-6438270	-6137337	-4037672	-6124387	-6080831	-6127429	-5713621	-3623951	-5012535	4	7	11	7	4	3	0	2	1
CDIF630erm_02524	CDIF630erm_02524	two-component response regulator	Cytoplasmic	Signal transduction	Two-component systems					27.3448	27.4293	26.2661	27.5357	27.2248	27.6253	27.0401	28.0096	28.3534	3505200	-1889210	-3113145	-535150	3820441	2763468	16908500	2607012	32023970	3	3	3	4	3	4	3	3	5
CDIF630erm_02530	CDIF630erm_02530	putative membrane protein	Unknown	Cell envelope	Other					NaN	26.3902	25.3401	26.5939	27.5669	26.3394	NaN	NaN	NaN	-5991860	-3930373	-3568647	806814	-2792797	-2570956	1424593	-4385627	-5352349	2	2	2	3	2	2	1	1	1
CDIF630erm_02537	CDIF630erm_02537	hypothetical protein	Unknown	Unknown function	Unknown function		x		x	28.1748	27.9121	28.1865	26.8943	26.7594	NaN	NaN	NaN	NaN	926100	-1699339	619534	-3727235	-5090130	-4322487	-5713621	-5848637	-5912021	3	3	3	3	2	1	0	0	0
CDIF630erm_02542	CDIF630erm_02542	putative pilin protein	CytoplasmicMembrane	Protein fate	Protein and peptide secretion and trafficking			x		31.7144	32.1307	32.7936	32.5817	32.0783	31.9495	31.9208	31.2845	31.0429	125484200	117120900	152978800	153684700	100776600	142295900	56986730	67065210	29247630	11	12	11	11	12	8	6	4	5
CDIF630erm_02549	CDIF630erm_02549	ABC-type transport system, molybdenum-like extracellular solute-binding protein	Unknown	Transport and binding proteins	Anions					NaN	NaN	NaN	NaN	24.4554	25.1753	NaN	NaN	NaN	-6671810	-6629831	-5954284	-5473521	-5228175	-4680630	-5713621	-5848637	-5912021	1	1	2	2	3	4	0	0	0
CDIF630erm_02554	CDIF630erm_02554	two-component response regulator	Cytoplasmic	Signal transduction	Two-component systems	x	x	x		26.6517	26.3562	25.5693	26.7874	26.8198	26.8856	27.3556	27.4466	28.2893	241600	-2437974	-4566255	-4360584	1319828	532862	11667900	-855756	26242810	6	4	4	4	4	5	4	3	5
CDIF630erm_02555	CDIF630erm_02555	two-component sensor histidine kinase	CytoplasmicMembrane	Signal transduction	Two-component systems					NaN	25.2158	24.6604	26.5597	NaN	NaN	NaN	NaN	NaN	-6724401	-6631971	-4958136	-6083822	-6236837	-5227904	-5713621	-5848637	-5912021	1	3	5	3	1	1	0	0	0
CDIF630erm_02556	Pgm	phosphoglucomutase	Cytoplasmic	Energy metabolism	Sugars	x	x	x		27.9773	27.8226	28.3388	29.148	29.6615	29.1166	27.7686	28.0867	28.3394	-4494500	-1264056	-64128.3	15318520	20108540	12148990	-2976736	7169977	510173	14	12	13	21	19	14	8	5	8
CDIF630erm_02558	RpiB1	ribose-5-phosphate isomerase	Cytoplasmic	Energy metabolism	Pentose phosphate pathway	x				26.8136	26.8138	27.1769	25.6869	NaN	NaN	27.3494	NaN	NaN	-2082700	-3091083	-3353150	-4260168	-5941064	-5960009	-2984034	-5537368	-5912021	4	3	3	4	1	1	2	1	0
CDIF630erm_02559	Tkt'1	transketolase, C-terminal section	Cytoplasmic	Energy metabolism	Pentose phosphate pathway	x	x	x		30.4514	30.3925	30.6171	29.5904	30.1456	29.2175	30.9235	30.9359	30.3186	76770200	65128660	51115480	30500510	53191830	26562370	166028800	78757460	42575420	13	14	13	11	11	7	10	9	11
CDIF630erm_02560	Tkt1	transketolase, N-terminal section	Cytoplasmic	Energy metabolism	Pentose phosphate pathway		x			29.7485	29.2691	29.0548	29.875	30.0854	29.8316	29.8836	29.7217	29.6842	57941200	35201000	13703190	60282680	57315040	73510820	50261020	38870120	35984050	10	11	6	7	7	3	4	4	6
CDIF630erm_02563	CDIF630erm_02563	PTS system, arabitol/xylitol-specific IIC component	CytoplasmicMembrane	Signal transduction	PTS					NaN	25.726	24.5014	NaN	NaN	NaN	NaN	NaN	NaN	-5619100	-3825935	-4406633	-6100895	-5767533	-6456996	-3727872	-5848637	-5912021	1	3	2	1	1	1	1	0	0
CDIF630erm_02566	CDIF630erm_02566	transcription antiterminator, PTS operon regulator	Cytoplasmic	Signal transduction	PTS		x			27.2315	27.3186	26.3881	28.3253	28.0588	27.6414	26.676	28.5153	28.2863	-6071870	-5784525	-6373950	-229974	-1981667	-5367662	-5214604	1895474	-3628923	10	11	10	18	20	9	3	10	11
CDIF630erm_02567	Tal2	transaldolase	Cytoplasmic	Energy metabolism	Pentose phosphate pathway					25.9593	27.1056	27.4924	25.8166	26.9655	24.4761	NaN	25.9402	25.0397	-2941700	2048863	-241275	-1692879	136233	-5903830	-5176475	-2269745	-2387509	8	9	10	7	7	2	1	3	2
CDIF630erm_02568	Xpt	xanthine phosphoribosyltransferase	Cytoplasmic	Purines, pyrimidines, nucleosides, and nucleotides	Salvage of nucleosides and nucleotides	x	x			32.7725	32.4133	31.4028	33.1767	33.498	32.8798	33.1099	33.4422	33.9295	610454200	281325500	96092520	457067600	813298800	566927000	351701800	397990100	1412019000	10	11	7	11	11	9	7	6	9
CDIF630erm_02573	MtlA	PTS system, mannitol-specific, IICB component	CytoplasmicMembrane	Signal transduction	PTS			x		28.1196	27.6006	28.5779	28.4033	28.6605	29.2966	27.9404	NaN	27.7139	8973200	4112668	16087470	15010730	22985480	22192420	1310727	-4261888	1554721	7	6	5	5	5	5	2	1	3
CDIF630erm_02574	GuaB	IMP dehydrogenase	Cytoplasmic	Purines, pyrimidines, nucleosides, and nucleotides	Purine ribonucleotide biosynthesis	x	x	x		27.8557	27.8186	28.2228	30.1865	30.0003	29.8466	29.5302	28.6102	29.5459	-614100	3817957	2703777	38177130	24825330	37643000	9049908	4539101	11131520	13	10	13	23	20	18	5	6	11
CDIF630erm_02575	CDIF630erm_02575	putative toxic anion resistance protein	Cytoplasmic	Cellular processes	Toxin production and resistance	x	x			29.2639	29.1924	29.5273	30.8664	30.146	30.6529	30.0324	30.3369	30.6208	10149200	14078370	16962310	87308090	42245870	95950700	20107370	41970940	46015410	21	19	25	32	25	24	12	15	14
CDIF630erm_02576	CDIF630erm_02576	putative membrane protein	CytoplasmicMembrane	Cell envelope	Other	x		x		30.4174	30.6203	31.0513	29.7092	29.9097	30.4278	29.659	28.403	29.5219	10033200	20626410	55078750	35710070	25793670	53587180	1077453	1786283	1312261	12	13	17	13	7	11	3	6	4
CDIF630erm_02577	Gbd	NAD-dependent 4-hydroxybutyrate dehydrogenase	Cytoplasmic	Energy metabolism	Fermentation					24.1196	24.3217	NaN	24.7556	NaN	NaN	NaN	NaN	NaN	-5944190	-6377564	-6390128	-5227138	-5818973	-6254669	-3904551	-5848637	-4832084	5	2	1	2	1	1	1	0	1
CDIF630erm_02578	Cat2	4-hydroxybutyryl-CoA:coenzyme A transferase	Cytoplasmic	Energy metabolism	Fermentation	x	x	x		28.3996	28.3331	28.1768	26.9485	27.044	27.7577	29.6327	29.662	29.7314	4402200	9037733	2685784	-1467402	-3786755	3111396	23342030	28820650	26976350	13	12	9	8	5	8	9	8	10
CDIF630erm_02580	AbfD	bifunctional 4-hydroxybutyryl-CoA dehydratase/vinylacetyl-CoA-delta-isomerase	Cytoplasmic	Energy metabolism	Fermentation	x	x			26.9855	26.9016	26.8818	26.2279	26.1046	26.6113	NaN	26.9152	27.8543	-3850500	3112136	889426	-3440812	-4670221	-3364308	-5420427	-890704	2398221	9	9	9	7	3	3	1	2	4
CDIF630erm_02581	SucD	succinate-semialdehyde dehydrogenase (acetylating)	Cytoplasmic	Energy metabolism	Other	x		x		29.7314	29.4628	29.0996	29.0094	28.6549	29.1322	29.7148	30.0117	30.4156	12127200	26099620	10786900	14349490	5773387	13506260	13912880	26537120	39481910	18	18	15	17	14	13	8	14	15
CDIF630erm_02582	Cat1	succinyl-CoA:coenzyme A transferase	Cytoplasmic	Energy metabolism	Other	x	x	x		28.6023	28.3693	28.4565	27.2749	26.6431	27.9221	30.1979	29.1792	29.1549	9029200	20916170	15252510	3950343	-2962844	6581032	18119910	21147870	15149470	17	15	16	11	7	9	9	8	10
CDIF630erm_02583	CDIF630erm_02583	putative succinate transporter	CytoplasmicMembrane	Transport and binding proteins	Unknown substrate					27.2731	28.165	27.3731	27.2985	27.0177	25.7342	NaN	NaN	NaN	-4754300	883721	770771	2642600	-3168490	-1608210	-5281526	-3956328	-5912021	3	3	3	3	2	2	1	1	0
CDIF630erm_02584	CDIF630erm_02584	transcriptional regulator, LysR family	Cytoplasmic	Regulatory functions	DNA interactions	x	x			25.3023	24.8265	25.7584	25.8935	26.4502	26.7838	27.3704	27.2135	26.4191	-4205500	-5455618	-4145675	-1404682	1026738	-1119767	3163877	688000	-3368345	4	4	4	7	6	3	2	3	3
CDIF630erm_02586	PepQ1	xaa-pro dipeptidase	Cytoplasmic	Protein fate	Degradation of proteins, peptides, and glycopeptides	x		x		27.0624	25.7736	26.6084	26.5319	26.5063	26.4181	27.6893	27.6956	28.362	179000	-4743370	-3133336	-3826384	-4355881	-5342473	-2298712	10888680	12205530	12	9	10	7	7	2	4	4	3
CDIF630erm_02599	CDIF630erm_02599	putative hydrolase, HAD superfamily, subfamily IIB	Cytoplasmic	Unknown function	Enzymes of unknown specificity					31.0973	30.8242	30.1831	30.4991	30.713	30.8939	31.2252	30.2864	31.5013	121974200	70754580	55754700	65929430	101094400	72615780	282481500	80463970	294065000	15	13	13	14	14	11	11	7	15
CDIF630erm_02600	CDIF630erm_02600	uncharacterized protein, MerB-like	Unknown	Unknown function	Unknown function	x	x			30.5843	30.2397	29.493	29.3916	29.0797	29.1824	29.2479	28.9338	28.9565	77934200	47410470	36558370	20950520	29651510	18070360	31861180	13421150	34239630	11	14	11	10	9	6	5	3	6
CDIF630erm_02601	CDIF630erm_02601	ABC-type transport system, nitrate/sulfonate/taurine ATP-binding protein	CytoplasmicMembrane	Transport and binding proteins	Anions					31.5649	31.5347	31.8652	31.5882	31.5857	31.5149	31.5857	31.1309	31.6042	130154200	137123200	172352600	137638800	172212100	216672800	385561200	86122930	267383900	17	17	17	17	17	14	11	7	13
CDIF630erm_02602	CDIF630erm_02602	ABC-type transport system, sulfonates-family permease	CytoplasmicMembrane	n.d.	n.d.			x		30.2596	31.0737	31.4982	30.512	31.4898	30.9875	29.6418	29.7277	30.4346	97664200	194109000	154291800	93221230	103762900	66791370	14233920	20409030	182552900	5	5	5	5	4	4	3	3	4
CDIF630erm_02603	CDIF630erm_02603	hypothetical protein	Unknown	Unknown function	Unknown function					25.2051	25.8021	25.5565	25.7087	25.2887	25.5001	25.6674	NaN	25.6983	-3888500	-3902142	-3281466	-2450718	-1891626	-3726663	1266844	-5381827	-42484.6	4	5	6	4	3	3	2	1	2
CDIF630erm_02604	CDIF630erm_02604	hypothetical protein	Unknown	Unknown function	Unknown function				x	24.1838	24.9276	26.0322	25.2633	NaN	NaN	NaN	NaN	NaN	-5483800	-5132800	-4137611	-2363606	-3848771	1976350	-5713621	-5848637	-5912021	2	2	2	2	1	2	0	0	0
CDIF630erm_02605	CDIF630erm_02605	ABC-type transport system, nitrate/sulfonate/taurine extracellular solute-binding protein	Unknown	Transport and binding proteins	Anions					33.2831	33.7004	34.0195	33.5198	33.1804	33.3032	33.353	33.5913	33.1757	160774200	228714900	299026500	227415900	210117900	270639000	304480900	363974300	225821400	22	23	22	23	23	19	13	15	12
CDIF630erm_02606	CDIF630erm_02606	hypothetical protein	Unknown	Unknown function	Unknown function		x			29.2038	29.2795	29.2636	31.0252	29.9603	30.7749	NaN	30.1973	28.3098	9732200	7056480	13792670	42938090	26237920	45470300	-710868	12656160	-2435484	8	7	8	13	10	8	1	3	3
CDIF630erm_02607	CDIF630erm_02607	ABC-type transport system, multidrug-family permease	CytoplasmicMembrane	Cellular processes	Toxin production and resistance					27.1121	27.1407	28.0506	28.4533	27.9784	27.7204	NaN	27.0504	NaN	-2617300	3345758	17879450	10403900	8288858	15210150	119294	11435610	-2120720	3	3	3	3	3	3	1	2	1
CDIF630erm_02608	CDIF630erm_02608	hypothetical protein	Unknown	Unknown function	Unknown function					29.9481	29.7098	28.9449	29.8579	28.8728	27.7128	NaN	NaN	NaN	56827200	28244330	7038087	60563360	49582350	27323600	4360045	41840180	18240720	6	4	5	5	5	5	1	1	1
CDIF630erm_02609	CDIF630erm_02609	DsrEFH-like protein	Cytoplasmic	Unknown function	Unknown function					27.2292	26.3014	26.7325	26.5507	25.4647	NaN	NaN	NaN	NaN	3072000	-2721581	-2211412	-784638	-3931238	-4230484	-5713621	-2457998	-3932886	2	2	2	2	2	1	0	1	1
CDIF630erm_02612	NadA	quinolinate synthetase A	Cytoplasmic	Biosynthesis of cofactors, prosthetic groups, and carriers	Pyridine nucleotides					26.9082	26.9037	26.2416	NaN	25.6623	NaN	25.3539	NaN	NaN	-585700	-2691505	-1844293	-6599262	-6157617	-6271181	-2806600	-5266056	-5912021	7	7	7	1	2	1	3	2	1
CDIF630erm_02616	CDIF630erm_02616	putative membrane protein	CytoplasmicMembrane	Hypothetical proteins	Domain		x			NaN	24.9704	25.0266	26.1971	26.0785	NaN	NaN	NaN	NaN	-6271060	-5636632	-4994962	977596	964054	-6134176	-5713621	1610237	-4701570	1	1	2	3	2	1	0	1	1
CDIF630erm_02617	CDIF630erm_02617	putative hydrolase, NUDIX family	Cytoplasmic	Fatty acid and phospholipid metabolis	Other					24.9184	23.9133	NaN	25.2062	24.8386	NaN	24.4473	25.577	24.9676	-5714200	-5956784	-6503496	-3312520	-4583020	-6456996	-4925878	-1555878	-5028395	3	3	2	3	3	0	2	2	2
CDIF630erm_02618	CDIF630erm_02618	putative membrane protein	CytoplasmicMembrane	Hypothetical proteins	Domain				x	24.3988	24.8367	25.75	NaN	NaN	NaN	NaN	NaN	NaN	-5771150	-4238061	2423187	-6677498	-6577091	-6456996	-5713621	-4665676	-4214617	2	2	2	0	0	0	0	1	1
CDIF630erm_02619	CDIF630erm_02619	indole-3-acetate kinase	Cytoplasmic	Energy metabolism	Fermentation	x		x		27.7686	27.2301	27.3831	26.3592	26.4792	27.2544	28.8109	28.0413	27.8202	3367200	724561	50087.9	-4540699	-4413731	-1376950	11637870	14302200	8041769	11	13	11	11	7	8	7	9	8
CDIF630erm_02620	IorB	indolepyruvate oxidoreductase, sununit beta	Cytoplasmic	Energy metabolism	Anaerobic					26.3093	26.0273	25.5363	NaN	NaN	NaN	27.032	25.8072	26.8202	-637700	-2089692	-4979788	-6677498	-6577091	-6312793	-1498750	-4205599	9963561	7	8	7	0	0	1	2	2	5
CDIF630erm_02623	CDIF630erm_02623	transcriptional regulator, sigma-54-dependent	Cytoplasmic	Transcription	Transcription factors		x			26.4851	25.4807	25.422	27.322	27.2122	26.7068	NaN	26.8809	27.268	-5626000	-5509036	-6300787	-2424299	-3399322	-2775701	-3813065	1512652	-1342586	9	9	7	9	10	7	3	5	5
CDIF630erm_02635	CDIF630erm_02635	putative glycosyl transferase, family 51	CytoplasmicMembrane	Cell envelope	Biosynthesis and degradation of surface polysaccharides and lipopolysaccharides					28.7826	28.7455	29.7105	29.6618	29.8237	29.8186	30.0487	28.4889	29.1001	16143200	10957070	21568450	15514990	30219210	22732080	38947200	5352474	17319290	13	16	15	16	18	13	7	6	7
CDIF630erm_02636	DnaQ	DNA polymerase III, epsilon subunit	Cytoplasmic	DNA metabolism	Degradation of DNA					24.6029	25.0805	24.9487	24.5257	NaN	NaN	NaN	NaN	NaN	-6056060	-5009356	-5764312	-4935773	-5408257	-5875460	-1130165	1057582	3335367	2	2	2	2	1	1	1	1	1
CDIF630erm_02638	CDIF630erm_02638	uncharacterized protein	Unknown	Hypothetical proteins	Domain		x			23.9615	22.8079	23.5135	26.1194	25.5226	NaN	NaN	NaN	NaN	-5758460	-6461327	-5927807	-3556876	-5382694	-6456996	-5173694	-1106914	-5912021	2	2	2	2	2	0	1	1	0
CDIF630erm_02640	TtcA1	putative 2-thiocytidine tRNA biosynthesis protein TtcA	Cytoplasmic	Protein synthesis	tRNA and rRNA base modification					NaN	NaN	25.2419	25.8507	26.1191	NaN	NaN	NaN	NaN	-6471790	-6409357	-4784355	-5815759	-2859263	-3011379	-3630598	-5848637	-1733228	2	2	3	3	4	2	3	0	2
CDIF630erm_02646	CDIF630erm_02646	DNA topoisomerase type IA	Cytoplasmic	DNA metabolism	DNA replication, recombination, and repair					26.2818	25.8543	NaN	26.6331	26.1884	25.7315	NaN	26.4118	NaN	-5757560	-6332347	-6563815	-5929606	-6464070	37074.4	-4900571	-5212539	-5311305	3	2	1	5	2	3	1	2	2
CDIF630erm_02648	CDIF630erm_02648	putative lipoprotein	Cytoplasmic	Transport and binding proteins	Unknown substrate					29.2724	29.6624	30.8035	30.7252	30.1137	29.8561	29.9445	30.2704	30.3533	16043200	22871010	33023030	45849470	34155410	23142310	7078621	21597380	25217650	20	20	22	21	21	17	9	13	14
CDIF630erm_02649	CDIF630erm_02649	putative multidrug efflux pump	CytoplasmicMembrane	Cellular processes	Toxin production and resistance		x			31.5132	31.5295	31.8966	30.6345	30.2827	30.7399	30.6565	30.4657	31.601	5809200	12954840	37887400	4991209	267588	6959016	-1132053	52625220	6947466	32	38	39	28	19	22	8	12	17
CDIF630erm_02650	CDIF630erm_02650	putative multidrug efflux pump	Unknown	Cellular processes	Detoxification					NaN	24.1444	25.1922	NaN	NaN	NaN	NaN	NaN	NaN	-6633140	-6235659	-5214205	-6066640	-6153432	-5683794	-5508112	-5848637	-5912021	1	3	4	3	4	2	1	0	0
CDIF630erm_02652	PpdK	pyruvate phosphate dikinase	Cytoplasmic	Energy metabolism	Glycolysis/gluconeogenesis					30.2246	29.8796	29.271	29.4582	29.7916	29.4295	29.0254	29.7492	29.6028	1054800	4301713	-1450824	7907345	8091494	-819277	-1929247	12777120	-936191	27	27	26	29	28	17	10	13	11
CDIF630erm_02653	CDIF630erm_02653	pyruvate, phosphate dikinase regulatory protein	Cytoplasmic	Regulatory functions	Other					31.9516	31.2992	30.1378	30.1094	30.814	30.7575	31.1781	30.2524	31.2931	196144200	95616010	38775370	36883180	89466940	51141150	211598300	24291190	161621400	23	22	21	21	22	14	19	6	21
CDIF630erm_02654	CDIF630erm_02654	putative transcriptional repressor ccpn	Cytoplasmic	Regulatory functions	Other					28.9259	28.4691	27.4877	27.3241	27.6874	25.7653	27.6384	27.6301	28.9944	31755200	18003730	192571	8819292	12707010	-6015688	25712890	4101683	45350260	10	8	8	7	9	2	4	6	7
CDIF630erm_02663	CDIF630erm_02663	putative amidohydrolase, M20D family	Cytoplasmic	Protein fate	Degradation of proteins, peptides, and glycopeptides					28.6521	28.23	28.6898	NaN	NaN	NaN	28.2725	NaN	NaN	-3317900	4223288	21160460	1157416	26892850	22269200	14582680	-4125708	-5912021	3	2	2	1	1	1	2	1	0
CDIF630erm_02675	GlyS	glycine-tRNA ligase, beta subunit	Cytoplasmic	Protein synthesis	tRNA aminoacylation	x		x		31.3023	31.2923	31.1417	31.3168	31.2851	30.8663	31.8601	31.7227	31.4968	13080200	31459740	17995680	58827000	45428830	25711190	26193300	53918180	27134180	36	33	36	35	29	25	17	25	23
CDIF630erm_02676	GlyQ	glycine-tRNA ligase, alpha subunit	Cytoplasmic	Protein synthesis	tRNA aminoacylation	x		x		27.7931	27.8606	27.828	27.6287	28.6147	27.8923	29.7439	28.8437	28.7469	9978200	7185262	4667905	2999863	13785490	7887191	88350650	19570490	29282200	10	8	9	9	8	6	7	4	6
CDIF630erm_02677	CDIF630erm_02677	uncharacterized protein	Cytoplasmic	Unknown function	Unknown function					26.7205	25.7843	28.0669	27.4028	27.3225	25.568	28.2728	26.6866	27.4573	9697200	3064255	6451134	4881318	138672	-1143629	3913359	-949649	5492405	7	5	7	8	6	3	2	2	3
CDIF630erm_02680	CDIF630erm_02680	putative divalent cation transporter, MgtE family	CytoplasmicMembrane	Transport and binding proteins	Cations and iron carrying compounds					30.7987	30.868	30.9473	30.8495	30.9406	31.2196	30.7607	30.4814	31.1408	20477200	44875300	55890860	58132450	41796440	49476090	17569060	43515640	41526210	15	16	13	16	15	15	8	10	9
CDIF630erm_02681	Era	GTP-binding protein Era	CytoplasmicMembrane	Protein synthesis	Other					25.6157	25.529	26.0185	25.4804	25.952	25.5731	NaN	26.026	NaN	-2476600	-4686168	-4476666	-5394329	-3879164	-3978043	-5713621	-3301638	-4924884	7	8	7	4	4	3	0	2	1
CDIF630erm_02682	Cdd1	cytidine deaminase	Cytoplasmic	Purines, pyrimidines, nucleosides, and nucleotides	Salvage of nucleosides and nucleotides				x	27.1453	26.8102	26.8176	NaN	NaN	NaN	NaN	NaN	NaN	-2276600	-3454680	-5397193	-6638980	-6367647	-6328802	-5713621	-5848637	-5912021	5	5	4	1	1	1	0	0	0
CDIF630erm_02683	DgkA	putative undecaprenol kinase	CytoplasmicMembrane	Fatty acid and phospholipid metabolis	Biosynthesis					NaN	27.4071	28.0578	28.4082	28.4178	27.1917	NaN	NaN	NaN	-4252000	6801394	3056338	1248278	-340188	4142679	-5713621	-5848637	-2936118	1	2	2	1	2	2	0	0	1
CDIF630erm_02684	YbeY	endoribonuclease YbeY	Cytoplasmic	Protein synthesis	Other				x	26.3034	25.444	25.3307	NaN	NaN	NaN	NaN	NaN	NaN	-3414600	-5503316	-4073292	-5789403	-6485556	-6456996	-5713621	-5848637	-5912021	3	3	3	2	1	0	0	0	0
CDIF630erm_02685	CDIF630erm_02685	PhoH-like protein	Cytoplasmic	Cellular processes	Adaptations to atypical conditions					NaN	NaN	23.9903	25.6104	25.3923	NaN	NaN	25.2375	25.8991	-5835150	-6117400	-6442891	-6056041	-4842161	-5102965	-4037312	9843027	-3865649	3	2	3	5	5	5	3	4	4
CDIF630erm_02688	CDIF630erm_02688	putative ribosome-associated sigma 54 modulation protein	Cytoplasmic	Protein synthesis	Translation factors	x	x	x		29.957	29.9103	29.3073	30.1931	30.2209	30.4343	31.8392	31.472	32.3968	119564200	69039980	38271570	87584010	171591200	123453700	315879100	122245800	556908000	9	10	10	8	8	7	8	7	9
CDIF630erm_02690	CDIF630erm_02690	putative aspartyl/glutamyl-tRNA amidotransferase subunit B-related	Cytoplasmic	Unknown function	Unknown function					24.6962	24.3275	26.3521	NaN	NaN	NaN	NaN	NaN	NaN	-5906990	-6246924	-4316028	-6540970	-6444708	-6136474	-5465151	-5848637	-5912021	3	2	3	1	1	1	1	0	0
CDIF630erm_02691	RpsU	30S ribosomal protein S21	Cytoplasmic	n.d.	n.d.				x	26.0093	25.9018	25.6934	23.7705	25.5184	NaN	NaN	NaN	NaN	-375400	-856451	407512	-1711948	-4540414	-3899445	-5713621	-5848637	-5912021	2	2	3	3	2	1	0	0	0
CDIF630erm_02692	CDIF630erm_02692	putative histidine triad (HIT) protein	Cytoplasmic	Purines, pyrimidines, nucleosides, and nucleotides	Nucleotide and nucleoside interconversions					28.4287	27.766	27.8016	NaN	NaN	NaN	NaN	NaN	NaN	6325200	-2826204	-4034117	-5949689	-6135415	-6456996	-5108924	-5848637	-5912021	4	5	3	1	1	0	1	0	0
CDIF630erm_02693	MtaB	threonylcarbamoyladenosine tRNA methylthiotransferase	Cytoplasmic	Protein synthesis	tRNA and rRNA base modification	x	x	x		27.3216	27.7418	27.4185	27.0655	26.7889	27.0747	28.1897	27.2218	28.0989	-2807800	3558743	2119742	3535519	-286598	-428934	0	1083572	7375116	7	9	11	10	10	5	3	3	7
CDIF630erm_02695	PrmA	ribosomal protein L11 methyltransferase	Cytoplasmic	Protein synthesis	Ribosomal proteins: synthesis and modification					29.5682	28.4865	28.2727	27.4969	28.6554	26.2777	26.0677	26.8092	27.3515	26701200	10948820	10729030	2138342	14165440	-2064836	4560408	-1371120	-2155374	12	12	10	6	8	3	3	2	3
CDIF630erm_02696	CDIF630erm_02696	putative CRISPR-associated ATP-dependent helicase	Cytoplasmic	Mobile and extrachromosomal element functions	Other					25.9287	26.7722	26.0482	26.8203	26.4729	26.2987	NaN	NaN	27.2871	-6498680	-6262746	-6486607	-2989289	-4704117	-5495399	-5529379	-3276709	-4138198	6	2	2	10	6	4	2	3	4
CDIF630erm_02698	CDIF630erm_02698	putative CRISPR-associated negative autoregulator	Cytoplasmic	Mobile and extrachromosomal element functions	Other					25.0215	NaN	NaN	26.3546	26.6761	26.3166	NaN	NaN	NaN	-6020710	-6618289	-6708932	-3744467	-903538	-3395535	-5713621	-5848637	-5413124	3	1	1	4	4	3	0	0	1
CDIF630erm_02702	CDIF630erm_02702	ABC-type transport system, sugar-family ATP-binding protein	CytoplasmicMembrane	Unknown function	Unknown function			x		30.8678	31.0301	31.9149	31.1367	31.0721	31.7242	30.9675	30.5394	30.3315	43325200	51813810	79578090	78102990	102388000	149070200	55841140	68351640	50531660	11	13	11	9	9	6	5	6	5
CDIF630erm_02705	GlcK	glucokinase	Cytoplasmic	Unknown function	General	x	x			31.1854	30.6252	30.3471	28.2041	29.1128	28.4365	29.5349	28.1394	27.79	148514200	62018090	46777770	7427824	20749420	6690281	29021470	4731492	747598	14	13	11	6	6	4	5	3	4
CDIF630erm_02706	DnaJ	chaperone protein DnaJ	Cytoplasmic	Protein fate	Protein folding and stabilization					28.8564	28.9337	29.3637	28.9846	29.4538	29.0232	29.1415	29.4713	30.3708	15546200	23876490	23715920	21510430	28257400	17875120	20278280	19438090	37248210	12	15	12	14	10	7	4	5	5
CDIF630erm_02707	DnaK	chaperone protein DnaK	Cytoplasmic	Protein fate	Protein folding and stabilization			x		31.6534	31.5075	31.9985	31.5686	31.9505	31.64	31.5464	31.5276	31.4052	44478200	107222800	78372090	79349370	84721330	72751780	51189500	67083190	42021500	34	34	34	36	32	29	18	18	21
CDIF630erm_02708	GrpE	protein (HSP-70 cofactor)	Cytoplasmic	Protein fate	Protein folding and stabilization					26.2829	26.3082	25.1595	24.9812	25.1632	25.0002	NaN	24.9514	26.3113	-517600	-1789108	-3866494	-5517489	-3675600	-5096484	4941154	-2931424	188121	5	4	3	3	3	3	1	2	3
CDIF630erm_02709	HrcA	transcriptional regulator, heat-inducible repressor HrcA	Cytoplasmic	Regulatory functions	DNA interactions	x	x	x		29.3594	28.7963	28.8296	30.032	30.1252	29.9517	30.3114	30.7688	30.7218	22017200	5945327	7247192	30031450	44365870	37379750	70575570	71633900	39669810	13	13	13	16	14	14	10	10	10
CDIF630erm_02713	LepA	elongation factor 4	CytoplasmicMembrane	Unknown function	Unknown function	x	x			31.2158	30.6833	30.688	32.4149	32.5835	32.3144	32.6258	31.9282	31.7254	26005200	36970920	26014610	135612200	127387500	120364900	77774750	117915800	81615550	26	28	25	30	28	26	18	22	22
CDIF630erm_02718	CDIF630erm_02718	transcriptional regulator, ArsR family	Unknown	Regulatory functions	DNA interactions					22.9539	NaN	NaN	25.4284	23.5268	NaN	NaN	NaN	NaN	-6465390	-6758146	-6671494	-4562302	-6154370	-6456996	-5713621	-5848637	-5912021	2	0	1	3	2	0	0	0	0
CDIF630erm_02719	RpsT	30S ribosomal protein S20	Cytoplasmic	Protein synthesis	Ribosomal proteins: synthesis and modification	x	x			28.9974	29.3771	28.8437	27.6939	27.2527	28.2052	28.0407	28.1048	NaN	47989200	69412280	28105180	43585060	29168080	22666270	10839890	5446790	-5912021	6	7	7	6	3	4	2	2	0
CDIF630erm_02720	YqeN	putative DNA polymerase III, delta subunit	Cytoplasmic	DNA metabolism	DNA replication, recombination, and repair	x	x			27.9916	27.0967	27.1377	28.1939	28.0104	28.2029	28.2177	28.2029	28.076	94200	-4406805	-3939512	9199865	7452093	5512018	2291752	7984005	1157210	7	5	7	8	8	7	4	6	5
CDIF630erm_02722	CDIF630erm_02722	gnat family acetyltransferase	Unknown	Unknown function	Enzymes of unknown specificity					24.2061	24.1312	24.1166	23.9088	24.1903	23.9018	NaN	NaN	NaN	-5820480	-6111043	-6619047	-6047399	-6212674	-5779686	-2290910	-5848637	-1608474	4	2	3	2	2	3	2	0	2
CDIF630erm_02725	TcdA	tRNA threonylcarbamoyladenosine dehydratase	Cytoplasmic	Biosynthesis of cofactors, prosthetic	Molybdopterin					24.3226	24.9819	NaN	25.1059	24.8823	25.3728	26.5648	25.3078	27.1588	-5663600	-5999750	-6324870	-6295436	-3710632	-4324756	7728788	-3906655	10791800	3	2	1	3	4	4	5	3	6
CDIF630erm_02728	Ung	uracil-DNA glycosylase (UDG)	Cytoplasmic	DNA metabolism	DNA replication, recombination, and repair					27.2172	27.1242	25.6554	NaN	NaN	24.9857	26.7946	NaN	27.0797	7638200	3038664	-2696374	-6166391	-5181402	-5121879	6449241	-3191669	13759800	10	10	6	1	1	2	3	1	4
CDIF630erm_02729	CDIF630erm_02729	putative lipoprotein	Unknown	Unknown function	Unknown function					29.3891	28.8401	29.8491	29.7774	28.9231	29.8799	27.5397	29.6485	29.1956	17762200	16485590	20219480	35402280	23474080	31842730	-1134821	12414240	-58776.4	5	5	5	5	5	5	2	3	3
CDIF630erm_02730	ApbE	FAD:protein FMN transferase	Unknown	Biosynthesis of cofactors, prosthetic	Thiamine	x		x		30.2376	30.777	30.9719	30.8176	30.677	31.2579	30.2356	30.1085	30.1283	35232200	39738900	52058890	38497760	54778130	93158060	39627390	34077500	13424590	20	20	20	16	16	15	9	9	12
CDIF630erm_02733	CDIF630erm_02733	PTS system, fructose-like IIC component	CytoplasmicMembrane	Signal transduction	PTS		x			29.4297	29.2882	29.914	28.8758	28.607	29.0882	30.1094	27.8614	28.008	15561200	30104230	55419160	18691340	19513490	18923730	24145790	20925560	7201501	7	5	5	3	3	4	2	2	2
CDIF630erm_02738	Pmi	mannose-6-phosphate isomerase	Unknown	Energy metabolism	Sugars	x	x			30.0861	29.0872	29.2232	27.8663	28.2403	27.9985	27.5266	28.4897	28.2766	28472200	14567910	17121810	3152568	5278867	3080684	843023	5574779	2364625	14	14	12	9	7	5	3	6	5
CDIF630erm_02739	CDIF630erm_02739	two-component sensor histidine kinase, sporulation-associated spo0A	CytoplasmicMembrane	Signal transduction	Two-component systems	x		x		27.9228	27.8202	27.9728	28.044	27.8745	28.0076	28.3829	28.3066	28.0847	-5402500	-4076052	-2268556	-1303506	-3472037	-3092394	-3950860	-1185664	-4208406	12	12	11	12	9	8	4	4	5
CDIF630erm_02741	SelB	selenocysteinyl-tRNA-specific translation factor	Cytoplasmic	Protein synthesis	Translation factors					27.5284	27.2642	27.2195	26.9205	27.5673	27.0853	28.5026	26.7935	27.7509	-4501200	-1719267	-2763741	-3240994	738305	-3572795	-1927988	-1975019	-1452577	16	17	14	8	8	7	2	4	5
CDIF630erm_02742	SelA	L-seryl-tRNA(Sec) selenium transferase	Cytoplasmic	Protein synthesis	tRNA aminoacylation					NaN	25.8462	NaN	25.6263	26.4306	27.0696	25.4256	NaN	NaN	-6745800	-5711824	-6330616	-4792340	-4861003	289136	-5023491	-4592402	-5747132	0	4	3	5	5	5	3	1	1
CDIF630erm_02743	SelD	selenide, water dikinase	Cytoplasmic	Central intermediary metabolism	Phosphorus compounds					25.5377	25.3555	26.2752	NaN	NaN	NaN	NaN	NaN	NaN	-3975100	-4532371	-4359076	-5914401	-6476776	-5933908	-5713621	18751560	-5554952	5	4	5	3	1	2	0	2	1
CDIF630erm_02745	DacF4	serine-type D-ala-D-ala carboxypeptidase	CytoplasmicMembrane	Cell envelope	Biosynthesis and degradation of murein sacculus and peptidoglycan	x		x		32.6749	32.8692	33.9118	33.2768	33.348	33.5285	31.7557	31.9284	31.9006	157104200	212022900	314855300	229880000	230512200	324364000	90482460	114625300	97323600	33	33	33	30	28	28	19	19	20
CDIF630erm_02749	YcsE	putative 5-amino-6-(5-phospho-D-ribitylamino)uracil phosphatase	Unknown	Unknown function	Enzymes of unknown specificity					30.2312	29.7511	28.9886	30.1952	30.3316	30.2279	30.5359	29.821	30.9566	92234200	48029620	25380490	34852830	82171120	50814280	170971500	11504750	235764800	17	15	14	14	14	11	12	7	13
CDIF630erm_02750	CDIF630erm_02750	putative histidinol-phosphate aminotransferase	Cytoplasmic	Amino acid biosynthesis	Aromatic amino acid family	x		x		28.9754	28.5251	28.3046	28.2409	28.4578	28.6047	30.4288	29.2557	29.4951	11330200	10208320	5330233	2988446	4978755	4255876	22233400	55606720	25634030	18	15	19	13	11	9	9	11	10
CDIF630erm_02751	CDIF630erm_02751	calcium-transporting ATPase	CytoplasmicMembrane	Transport and binding proteins	Cations and iron carrying compounds					25.6065	25.5081	26.4567	24.9732	NaN	NaN	NaN	NaN	24.5512	-6680656	-6201098	-5663548	-6547217	-6577091	-6172665	-5344848	-5848637	-5822570	6	7	9	3	0	3	1	0	2
CDIF630erm_02757	CDIF630erm_02757	transcriptional regulator, AraC family	Cytoplasmic	Transcription	Transcription factors		x			28.5216	28.793	27.4781	29.5829	29.1351	29.4452	NaN	NaN	27.3523	2535400	8017388	3711371	6553934	22269200	50787960	47226140	-5848637	1932992	6	5	5	7	8	4	1	0	2
CDIF630erm_02758	PagL	phospho-alpha-glucosidase	Cytoplasmic	Energy metabolism	Sugars		x			30.4283	30.0046	29.4584	30.5367	30.5885	30.5587	30.3375	30.7815	31.3323	18303200	31805630	15410560	45059780	38223180	45667740	20960780	41998730	59697940	25	25	26	26	26	21	13	20	20
CDIF630erm_02759	CDIF630erm_02759	PTS system, maltose-specific IIBC component	CytoplasmicMembrane	Signal transduction	PTS		x			29.1535	29.3845	29.8924	28.8462	28.7478	29.0134	27.7729	27.8253	29.085	-469600	8566360	26470270	6614350	-210949	7316597	-2323125	9992919	2519300	7	9	10	7	5	7	3	3	3
CDIF630erm_02760	CDIF630erm_02760	transcription antiterminator, PTS operon regulator	Unknown	Signal transduction	PTS					27.1229	26.7878	25.6314	26.9329	26.5108	27.2737	27.7672	27.2279	27.9258	3166900	1761912	-4535524	5068750	-717680	-895872	28030630	-1636025	25848980	10	9	7	8	6	6	7	5	7
CDIF630erm_02761	CDIF630erm_02761	PTS system, maltose-specific IIA component	Cytoplasmic	Signal transduction	PTS					28.8837	27.8468	27.8811	28.3101	27.5063	25.9297	28.2645	28.6872	27.0132	12499200	17614910	5562194	12165000	3816745	-2320842	7347695	19049050	4649131	6	6	7	7	5	2	2	3	2
CDIF630erm_02762	YjgF	2-iminobutanoate/2-iminopropanoate deaminase	Cytoplasmic	Transcription	Degradation of RNA					27.1076	27.8683	28.9431	NaN	NaN	NaN	NaN	NaN	NaN	3492200	2918138	10272410	4618723	1531015	3224155	-5713621	3557691	-5912021	2	2	2	1	1	1	0	1	0
CDIF630erm_02763	TdcB	threonine dehydratase	Cytoplasmic	Amino acid biosynthesis	Pyruvate family					28.6424	28.4844	28.5617	28.0739	28.7039	27.5906	28.1614	28.8733	29.0822	7853200	11813960	6592644	6552507	11358720	2279965	1699095	11783450	8889552	11	13	12	13	12	11	5	8	7
CDIF630erm_02764	AspD	bifunctional aspartate aminotransferase/L-aspartate beta-decarboxylase	Cytoplasmic	Energy metabolism	Amino acids and amines		x			26.8134	26.8513	27.1235	27.8171	28.1001	28.3941	26.2487	28.1769	28.3343	-5683800	-2486687	-2647230	5798974	3895839	5732928	-3565917	4541062	3389481	8	11	11	11	12	9	6	8	8
CDIF630erm_02765	AnsB	L-asparaginase	Cytoplasmic	Energy metabolism	Amino acids and amines		x	x		30.1627	29.0589	29.2211	28.7435	28.7401	28.0612	30.0258	29.0288	29.17	51672200	17270660	18392490	8130456	16592200	6959016	59091980	13775860	5205301	15	15	14	9	12	8	8	8	7
CDIF630erm_02769	Cwp29	cell surface protein	Cellwall	Cell envelope	Surface structures		x			27.6546	27.7133	27.9297	27.5962	26.7304	27.398	NaN	NaN	NaN	-2669300	-200942	-1807149	-1802164	-3087349	4869907	-3581017	-4889715	-5581190	2	2	2	2	2	2	1	1	1
CDIF630erm_02772	LeuS	leucine-tRNA ligase	Cytoplasmic	Protein synthesis	tRNA aminoacylation	x		x		30.6026	30.7824	30.7009	30.7993	30.8302	30.4543	29.1801	30.3733	29.8143	-70800	7461811	2895375	26706680	17945660	8372668	-856087	12191120	3485683	36	38	39	37	32	20	6	20	15
CDIF630erm_02774	RsfS	ribosomal silencing factor RsfS	Cytoplasmic	Unknown function	Unknown function					25.7658	25.7609	26.7919	27.5272	NaN	NaN	NaN	NaN	27.03	-2562300	-5845288	-2208364	-3539011	-5865167	-4349944	-5713621	-5340192	-5432791	3	2	2	2	1	1	0	1	2
CDIF630erm_02775	CDIF630erm_02775	putative hydrolase	Cytoplasmic	Unknown function	Enzymes of unknown specificity		x			28.8366	29.2521	29.3002	27.8387	28.6759	28.121	28.3333	29.7063	29.297	41747200	33317160	15190750	4722429	11734230	11761360	36796910	21894880	75678060	7	6	7	5	5	3	3	2	4
CDIF630erm_02777	RecX	regulatory protein RecX	Cytoplasmic	DNA metabolism	DNA replication, recombination, and repair					23.4705	NaN	23.1377	NaN	NaN	NaN	23.5532	NaN	NaN	-5922060	-6207335	-6408173	-6677498	-6577091	-6189298	-3253834	-5848637	-2928917	2	2	2	0	0	1	2	0	2
CDIF630erm_02778	GlgB	1,4-alpha-glucan branching enzyme	Unknown	Energy metabolism	Sugars					25.9247	26.1054	25.9697	25.8318	26.3863	26.0516	NaN	27.0599	26.2254	-6628460	-2122536	-5761455	-6120972	-5729007	-6023819	-5429198	-3375728	-5042959	2	4	6	3	3	2	2	4	3
CDIF630erm_02780	CDIF630erm_02780	hypothetical protein	Cytoplasmic	Unknown function	Unknown function	x		x		26.7834	26.0716	24.9493	26.4264	26.3034	26.4965	27.4832	NaN	27.9233	-2571200	-2838844	-4522064	-3086220	-598856	1011977	26977430	-2564938	30054080	1	2	2	2	2	2	3	1	3
CDIF630erm_02784	CDIF630erm_02784	putative serine-pyruvate aminotransferase	Cytoplasmic	Amino acid biosynthesis	Serine family				x	25.1624	24.3419	25.2329	NaN	NaN	NaN	NaN	NaN	NaN	-4906700	-6323933	-5507735	-6677498	-6577091	-6456996	-4047001	-5848637	-5587671	4	3	3	0	0	0	1	0	1
CDIF630erm_02785	CDIF630erm_02785	ABC-type transport system, permease	CytoplasmicMembrane	Transport and binding proteins	Amino acids, peptides and amines					NaN	23.6596	24.8319	NaN	NaN	NaN	NaN	NaN	NaN	-6739842	-6723700	-6212366	-6629578	-6543496	-6376465	-5713621	-5848637	-5912021	1	3	5	3	1	1	0	0	0
CDIF630erm_02787	CDIF630erm_02787	two-component sensor histidine kinase	CytoplasmicMembrane	Signal transduction	Other	x		x		26.7204	27.3012	27.149	27.1713	26.941	27.4535	28.4291	NaN	27.823	-2539100	1523914	5423601	-5272879	-5848778	-5488447	-4751829	15369580	-361479	7	7	8	8	6	5	2	1	3
CDIF630erm_02788	WalR	transcriptional regulatory protein WalR	Cytoplasmic	Signal transduction	Two-component systems					24.0941	23.6999	NaN	NaN	NaN	NaN	NaN	NaN	NaN	-4118600	-5254952	-6146606	-4300841	-3737521	-5925129	29679	-5848637	3893040	3	3	2	1	1	1	1	0	2
CDIF630erm_02790	CDIF630erm_02790	putative lipoprotein	Cytoplasmic	Transport and binding proteins	Unknown substrate					28.3369	28.6346	29.3689	27.7685	28.3914	28.6846	28.4832	26.6395	26.904	26748200	20713090	36101260	1175969	15629040	10222440	23538350	673779	3728444	14	14	13	8	10	8	6	3	5
CDIF630erm_02791	Rnz	ribonuclease Z	Cytoplasmic	Transcription	RNA processing	x	x	x		28.4494	28.3756	28.7182	26.936	27.1422	27.153	28.4293	27.6348	27.8206	20469200	11408630	8750316	1931406	2798877	-1436165	19847530	1790860	997649	7	8	7	5	4	3	5	2	4
CDIF630erm_02792	CDIF630erm_02792	coenzyme A disulfide reductase	Cytoplasmic	Energy metabolism	Other	x	x	x		27.7386	27.6332	27.2749	28.112	28.1868	28.4352	28.8203	28.7629	29.3435	-2192400	-249010	-1081864	4804252	2765614	10854900	856072	9991611	10028950	14	11	14	14	13	11	4	10	12
CDIF630erm_02793	TcyP	putative L-cystine uptake protein	CytoplasmicMembrane	Transport and binding proteins	Amino acids, peptides and amines	x		x		32.5729	32.7182	32.7613	32.3672	32.352	33.1075	31.3996	30.4336	29.5462	101714200	146699300	221472900	241306800	242354100	335179200	182669900	87417530	29074770	7	9	8	8	8	7	3	4	4
CDIF630erm_02794	CDIF630erm_02794	hypothetical protein	Unknown	Unknown function	Unknown function					26.1666	26.3226	27.429	26.9451	26.5312	26.861	26.4708	25.1626	NaN	-2564500	-4381618	-2667675	-3769048	-4138589	-1306836	9183868	-4343923	-5798681	8	10	11	6	9	6	4	3	1
CDIF630erm_02796	CDIF630erm_02796	hypothetical protein	CytoplasmicMembrane	Unknown function	Unknown function					25.7065	25.5298	26.242	25.9196	25.3904	26.1765	NaN	NaN	NaN	-4046800	-4325155	-2542847	-5428983	-5587488	-5610970	-2447958	-5848637	-5912021	6	4	6	3	2	2	2	0	0
CDIF630erm_02797	BcsA	cellulose synthase catalytic subunit (UDP-forming)	CytoplasmicMembrane	Energy metabolism	Biosynthesis and degradation of polysaccharides					27.3836	26.9954	27.1857	27.1125	27.1275	27.2	NaN	NaN	NaN	-5504400	-5592993	-4501555	-3520955	-5545166	-5342061	-5482076	-5680745	-5912021	10	10	9	6	4	4	1	1	0
CDIF630erm_02798	CDIF630erm_02798	endoglucanase	Extracellular	Energy metabolism	Biosynthesis and degradation of polysaccharides					24.9091	24.9513	25.3316	25.2022	24.9726	NaN	25.3381	NaN	24.5886	-6209270	-5878769	-4008275	-5702229	-5744270	-5811267	-3906690	-5720473	-5464078	5	5	7	4	3	1	2	1	2
CDIF630erm_02799	CDIF630erm_02799	hypothetical protein	Cytoplasmic	Unknown function	Unknown function	x	x	x		26.2804	26.1414	27.0005	27.8664	27.7398	27.7893	26.7407	27.2436	27.2472	-6241850	-5340662	-4326250	1981831	-2029860	1915802	-1882812	-526780	-2928197	7	10	10	13	11	9	4	5	4
CDIF630erm_02800	CDIF630erm_02800	ABC-type transport system, sugar-family permease	CytoplasmicMembrane	Transport and binding proteins	Carbohydrates, organic alcohols, and acids					28.757	28.9752	28.575	28.6219	29.0429	28.9174	29.1039	27.7241	NaN	7460200	16920640	11187610	18214680	18474930	16127140	-2409828	-3426286	-4098684	5	4	5	5	5	3	2	2	1
CDIF630erm_02801	CDIF630erm_02801	ABC-type transport system, sugar-family permease	CytoplasmicMembrane	Transport and binding proteins	Carbohydrates, organic alcohols, and acids		x			25.5617	26.3344	26.0583	26.5059	27.0282	27.7182	NaN	NaN	NaN	-5750750	-3551830	-3248005	-354021	-984585	-1076166	-5109226	21610460	-5912021	2	2	3	5	3	4	1	1	0
CDIF630erm_02802	CDIF630erm_02802	ABC-type transport system, sugar-family extracellular solute-binding protein	Unknown	Transport and binding proteins	Carbohydrates, organic alcohols, and acids					31.7429	32.6311	33.6227	32.2827	32.1485	32.1101	30.8819	32.2734	31.3514	127574200	240470400	384112800	163070600	147663500	182900000	47004420	165060700	75896020	26	31	31	24	25	23	13	17	18
CDIF630erm_02804	CDIF630erm_02804	PTS system, fructose/mannitol family IIC component	CytoplasmicMembrane	n.d.	n.d.		x			NaN	25.5802	25.1533	26.9675	27.3237	27.6451	NaN	NaN	NaN	-5842790	-3914781	-4954835	-2800304	6248688	14729060	-1565193	-5848637	-5912021	1	3	2	2	3	2	1	0	0
CDIF630erm_02808	CDIF630erm_02808	hypothetical protein	Cytoplasmic	Unknown function	Unknown function		x			24.4989	NaN	24.734	25.9118	25.7723	26.4022	NaN	NaN	NaN	-5266400	-6280672	-5807932	-4497491	-162377	-69819.7	-2888396	-2406741	6288330	2	2	2	3	3	2	1	2	2
CDIF630erm_02809	CoaD	phosphopantetheine adenylyltransferase	Cytoplasmic	Biosynthesis of cofactors, prosthetic groups, and carriers	Pantothenate and coenzyme A					28.197	27.2042	26.8392	28.7506	28.2228	27.8792	NaN	28.6523	29.0769	3999200	-1639924	-3546678	19030050	7957700	1693356	-4038444	3373636	1029140	9	7	7	9	7	7	1	4	3
CDIF630erm_02811	RecG	ATP-dependent DNA helicase RecG	Cytoplasmic	DNA metabolism	DNA replication, recombination, and repair	x	x			25.7602	25.7684	25.3435	27.0542	26.8617	27.0551	26.6885	27.5395	27.4946	-6093730	-6346860	-6443126	-1766306	-4506139	-3626618	-4501949	-229957	-4352242	11	6	5	13	13	7	4	7	4
CDIF630erm_02812	YloV	uncharacterized protein YloV	Cytoplasmic	Unknown function	Unknown function	x	x	x		30.502	30.0186	30.314	30.6667	30.6073	30.6382	31.1444	31.1097	31.1733	15168200	32732690	25683930	44831440	28851710	45305770	38606520	58857920	48999940	25	26	26	30	23	23	15	18	19
CDIF630erm_02813	YloU	uncharacterized protein YloU	Cytoplasmic	Unknown function	Unknown function					28.3241	28.2993	28.1031	28.4648	28.3114	28.5445	NaN	NaN	NaN	11153200	7129952	3171589	15524500	7871954	21062640	2045543	9879805	997123	5	5	4	4	3	4	1	1	1
CDIF630erm_02814	RpmB	50S ribosomal protein L28	Cytoplasmic	Protein synthesis	Ribosomal proteins: synthesis and modification		x			29.8776	29.9962	29.3835	28.3106	28.9098	28.0025	NaN	28.2255	NaN	45818200	29851620	15458210	13983660	26108560	9721605	-5240854	9966602	-5309622	4	4	3	4	4	3	1	2	1
CDIF630erm_02823	CDIF630erm_02823	two-component sensor histidine kinase	CytoplasmicMembrane	Signal transduction	Other		x			25.4524	25.3899	26.6154	25.3825	NaN	25.1991	NaN	24.0573	26.2401	-6200010	-5913062	-5109886	-6352847	-6577091	-6296602	-4294150	-5673345	-4046029	7	8	11	4	0	3	2	2	2
CDIF630erm_02824	CDIF630erm_02824	two-component response regulator	Cytoplasmic	Signal transduction	Two-component systems			x		24.5603	24.6134	23.8136	24.5039	NaN	24.579	25.1024	NaN	25.7772	-5599300	-5314368	-6118408	-6509984	-5489304	-5391789	2452735	-5658642	445387	3	4	4	2	1	2	2	1	2
CDIF630erm_02826	CDIF630erm_02826	putative phosphoglycolate phosphatase	Cytoplasmic	Unknown function	Enzymes of unknown specificity	x	x	x		27.3614	27.5973	27.2762	25.439	26.5288	26.6494	27.9733	26.712	28.0128	5041200	2795135	-1265106	-4687870	-602832	-3437073	14113820	-1698465	31743630	6	5	4	4	4	4	5	4	6
CDIF630erm_02828	Rpe2	ribulose-phosphate 3-epimerase	Cytoplasmic	Energy metabolism	Pentose phosphate pathway					NaN	24.6235	27.0427	25.9312	26.2588	26.0174	NaN	NaN	NaN	-3374600	-4021434	-1708226	-2850988	-1445396	-2428665	-4575855	-4487279	-1134393	2	2	2	2	2	2	1	1	1
CDIF630erm_02829	CDIF630erm_02829	thiamin monophosphate phosphatase	Cytoplasmic	Protein synthesis	Translation factors			x		26.8338	26.2491	25.6895	25.2058	25.8414	25.3473	26.1351	27.0535	26.5806	-55600	-5939605	-3987322	-5398637	-3668594	-3527368	9700.54	2671905	-3147911	7	5	5	6	5	5	3	4	3
CDIF630erm_02830	FabG2	3-oxoacyl-[acyl-carrier-protein] reductase	Cytoplasmic	Fatty acid and phospholipid metabolis	Biosynthesis			x		NaN	NaN	25.4611	25.7887	26.1282	25.2507	26.5843	26.2118	26.9238	-6283460	-6695184	-4630193	-3534956	1533159	-4221087	7756504	19181450	5836629	3	1	3	3	4	3	2	2	3
CDIF630erm_02831	Stk	putative serine/threonine-protein kinase	CytoplasmicMembrane	Protein fate	Protein modification and repair	x		x		32.924	33.1922	34.1361	34.0572	33.6431	33.9713	31.9681	32.3002	32.2896	98664200	207614600	299790000	412164800	323923900	514408600	64966580	121399100	87898770	33	34	35	35	25	25	11	19	18
CDIF630erm_02832	Stp	putative serine/threonine phosphatase	Cytoplasmic	Protein fate	Protein modification and repair					23.9059	24.2299	23.8213	NaN	NaN	NaN	NaN	NaN	NaN	-5030900	-5596314	-6020317	-6624660	-6577091	-6322804	-5504929	-5848637	-5333609	4	4	3	1	0	1	1	0	1
CDIF630erm_02833	RlmN	dual-specificity RNA methyltransferase RlmN	Cytoplasmic	Protein synthesis	tRNA and rRNA base modification					25.9072	26.0279	25.3369	24.8988	24.9276	26.8702	26.8152	26.3679	25.7557	-5088400	-5446115	-5326652	-5281432	-4682340	-474597	412735	8620515	-1440156	4	4	4	2	3	3	4	3	3
CDIF630erm_02834	RsmB	ribosomal RNA small subunit methyltransferase B	Cytoplasmic	Protein synthesis	tRNA and rRNA base modification	x	x			25.6678	26.0429	26.2787	27.177	26.9952	27.6156	NaN	27.0045	27.6082	-6118020	-4427748	-4488285	1227822	-657084	3665538	-3337769	-717130	736399	5	4	5	10	8	10	1	4	4
CDIF630erm_02835	CDIF630erm_02835	putative metal-dependent peptidase	CytoplasmicMembrane	Unknown function	Unknown function	x	x			30.7846	30.4139	31.2947	32.9392	32.7842	32.7951	33.2223	32.4103	32.7319	67163200	95558220	142766700	187389100	142459600	244994100	122769100	189481500	82652740	8	8	8	8	9	8	4	4	4
CDIF630erm_02836	CDIF630erm_02836	polyprenyl synthetase-related protein	CytoplasmicMembrane	Unknown function	Unknown function	x		x		28.8241	29.1017	29.1824	29.3249	29.2129	29.0542	27.4908	27.4	28.4419	10840200	13933080	12151920	19054310	9528483	24160210	1597817	1160888	5487144	7	8	8	10	8	6	3	3	4
CDIF630erm_02837	Fmt	methionyl-tRNA formyltransferase	Cytoplasmic	Protein synthesis	tRNA aminoacylation	x	x	x		26.821	27.4747	27.013	25.7344	25.8497	25.0121	28.4461	27.8981	28.0995	-672100	474180	1528412	-5138696	-4550355	-4824983	33579560	6162905	3088097	11	12	8	3	4	5	9	6	7
CDIF630erm_02838	Def2	peptide deformylase	Cytoplasmic	Protein fate	Protein modification and repair					26.4034	26.4092	26.0487	NaN	NaN	NaN	NaN	26.6879	26.5529	-978500	-1916981	-1677178	-5411814	-6166318	-6456996	-5713621	9965131	233742	2	2	2	1	1	0	0	2	2
CDIF630erm_02839	PriA	primosomal protein n'	Cytoplasmic	DNA metabolism	DNA replication, recombination, and repair					NaN	22.472	24.6608	24.5216	NaN	NaN	NaN	NaN	NaN	-6737086	-6720097	-6574666	-6112394	-2088183	-5494751	-5713621	7435435	-5557121	1	3	3	4	3	2	0	1	1
CDIF630erm_02840	CoaBC	bifunctional phosphopantothenoylcysteine synthetase/decarboxylase	Cytoplasmic	Biosynthesis of cofactors, prosthetic groups, and carriers	Pantothenate and coenzyme A	x	x			31.8319	32.0197	31.3416	32.8332	33.2148	32.7581	32.6657	33.3188	33.8517	102284200	160394700	98446170	260473300	254070300	226237500	171364100	375269300	500742300	30	30	27	30	29	25	20	21	23
CDIF630erm_02841	RpoZ	DNA-directed RNA polymerase subunit omega	Cytoplasmic	Transcription	DNA-dependent RNA polymerase					27.1234	26.8019	26.1977	25.7575	24.962	NaN	NaN	NaN	NaN	-270900	-2034520	-1096595	-4307176	-6338732	-5491746	-5713621	-5848637	-3273655	3	4	4	2	1	1	0	0	1
CDIF630erm_02842	Gmk	guanylate kinase	Cytoplasmic	Purines, pyrimidines, nucleosides, and nucleotides	Nucleotide and nucleoside interconversions					25.1173	25.8443	25.8981	24.9285	25.3712	25.3815	NaN	NaN	26.22	-4242100	-3143948	-4508159	-5140280	-4694270	-4243034	-4745688	-5663502	1744645	4	4	4	3	3	2	1	1	4
CDIF630erm_02845	LtaE	low specificity L-threonine aldolase	Cytoplasmic	Energy metabolism	Amino acids and amines					26.9973	26.001	25.6734	27.7606	27.9508	26.4856	NaN	27.0314	26.4708	-2862300	-4422581	-6062731	68503.1	-532768	-1362810	54738.8	4630965	-1967613	8	6	2	7	4	2	1	2	2
CDIF630erm_02846	YloA	uncharacterized protein YloA	Cytoplasmic	Cellular processes	Pathogenesis					25.1961	25.0357	25.7538	25.7118	25.8251	25.6273	NaN	25.5614	25.8193	-6485980	-6138896	-5310398	-4676276	-4449804	-4026092	-5440423	-4861896	-5145840	4	5	7	6	7	6	1	3	3
CDIF630erm_02847	CDIF630erm_02847	ABC-type transport system, pristinamycin/multidrug-family ATP-binding protein	Cytoplasmic	Cellular processes	Toxin production and resistance	x	x	x		25.4462	25.5704	25.0519	28.5218	27.9814	27.9696	28.597	28.6555	28.7853	-6077390	-5970927	-6190029	3954624	286289	422297	613559	84120550	3656292	7	3	3	13	9	11	8	9	8
CDIF630erm_02848	UraA	uracil permease	CytoplasmicMembrane	Unknown function	Unknown function					29.9067	29.8948	29.8606	29.7744	29.4938	30.3965	29.2322	NaN	NaN	6923200	16575570	37724010	13607850	9512960	16276530	33094540	7810901	6804666	5	4	5	4	4	5	3	1	1
CDIF630erm_02849	PyrR	bifunctional uracil phosphoribosyltransferase/regulatory protein	Cytoplasmic	Regulatory functions	RNA interactions		x			24.3225	23.9581	23.8815	25.2607	26.5349	25.1751	NaN	NaN	NaN	-5298200	-6374630	-6613352	-4965106	-3912397	-3742100	-5197188	-5183696	-1419814	5	2	2	7	8	5	1	1	3
CDIF630erm_02854	CstA	carbon starvation protein, CstA	CytoplasmicMembrane	Cellular processes	Adaptations to atypical conditions		x			31.1082	31.0925	31.2633	31.3922	31.4666	32.2382	31.8839	30.6486	30.2623	52039200	100040800	152619000	94981380	74217410	125612400	197936700	110838000	65967630	5	5	4	6	4	5	5	3	2
CDIF630erm_02855	CDIF630erm_02855	two-component response regulator	Cytoplasmic	Signal transduction	Two-component systems	x		x		26.6055	26.5324	26.0009	26.0251	26.2566	26.548	27.2511	27.2463	27.3944	1663900	55310	-2259857	-5569882	-1685317	-631618	24996900	-2078930	22807330	8	9	7	4	5	7	8	3	6
CDIF630erm_02862	TrpS	tryptophan-tRNA ligase	Cytoplasmic	Protein synthesis	tRNA aminoacylation		x			24.6612	NaN	24.4285	25.4568	25.0258	NaN	NaN	25.1219	24.6852	-5572000	-6660867	-6362166	-5599659	-4534638	-5592204	-5059847	-1805871	-4179513	5	1	3	3	6	2	1	3	2
CDIF630erm_02863	MtnN	bifunctional 5'-methylthioadenosine/S-adenosylhomocysteine nucleosidase	Cytoplasmic	Purines, pyrimidines, nucleosides, and nucleotides	Salvage of nucleosides and nucleotides					23.0387	23.0903	NaN	NaN	NaN	NaN	NaN	NaN	NaN	-5357900	-5721235	-6278824	-6477876	-4959849	-6001783	-4498363	-4957490	-3305248	2	2	2	2	2	1	1	2	1
CDIF630erm_02865	CDIF630erm_02865	putative amino acid permease	CytoplasmicMembrane	Transport and binding proteins	Amino acids, peptides and amines	x		x		31.4187	31.7818	31.5193	31.1454	31.3397	31.9724	30.9935	28.4937	28.2895	70565200	147665200	188108400	159326700	123477200	130579000	36738010	22860920	6282317	6	6	7	5	5	5	3	3	3
CDIF630erm_02866	CDIF630erm_02866	putative peptidase, M24 family	Cytoplasmic	Protein fate	Degradation of proteins, peptides, and glycopeptides					27.0009	26.4647	28.1056	27.131	27.2426	26.8624	NaN	NaN	26.458	-931000	1216489	5604015	1657869	2097458	-1265592	-5713621	-2774392	-3056371	7	7	8	4	5	3	0	1	2
CDIF630erm_02871	IleS	isoleucine-tRNA ligase	Cytoplasmic	Protein synthesis	tRNA aminoacylation	x		x		32.3121	32.2113	31.7562	32.3644	32.4896	30.5522	27.9357	29.2081	28.8672	15044200	26778200	11881540	39627110	34995130	4243372	-4762538	2554705	-3435042	54	55	55	53	50	31	8	14	13
CDIF630erm_02873	CDIF630erm_02873	putative cell-division initiation protein DivIVA	Cytoplasmic	Cellular processes	Cell division					29.4254	30.3283	31.4049	29.3844	29.6708	29.2346	29.8462	29.6896	29.4477	47065200	46963040	58667580	18125720	46020920	26588690	13492520	9958919	41427760	11	9	10	10	10	9	4	4	5
CDIF630erm_02874	CDIF630erm_02874	putative RNA-binding cell division protein	Cytoplasmic	Cellular processes	Cell division					25.2473	NaN	NaN	27.0846	27.3344	26.6098	26.7605	NaN	27.1193	-5910490	-6608952	-6421329	1238764	3899535	-4181552	3327169	-4917766	608180	3	1	2	7	6	5	2	1	2
CDIF630erm_02875	CDIF630erm_02875	uncharacterized protein	CytoplasmicMembrane	Unknown function	Unknown function					32.2864	31.9598	32.3469	32.6517	30.405	32.7912	NaN	32.9978	30.6143	240084200	170036800	212354900	267480600	176795100	337702000	-4287481	207494700	30173580	1	1	1	3	3	3	1	1	1
CDIF630erm_02876	SepF	cell division protein SepF	Cytoplasmic	Cellular processes	Cell division					30.2963	28.8783	29.3521	30.1386	29.3809	27.7995	28.03	29.0888	29.1881	46687200	31056880	22269200	54616910	29970840	4197522	3498083	18329830	7399918	8	9	9	8	8	2	3	3	2
CDIF630erm_02877	CDIF630erm_02877	putative pyridoxal 5'-phosphate-dependent enzyme	Cytoplasmic	Unknown function	Enzymes of unknown specificity	x	x	x		27.3712	27.6303	27.2112	26.3254	25.9004	27.0656	28.5158	29.3243	28.9612	10818200	9067452	5701760	-1818700	-419909	2102710	66244970	8568044	72814540	6	6	5	5	5	5	4	4	6
CDIF630erm_02880	CDIF630erm_02880	uncharacterized protein	Cytoplasmic	Unknown function	Unknown function	x	x	x		25.935	25.6224	26.5673	28.1321	28.1392	28.708	27.2713	27.4181	27.9496	-5327900	-6007241	-5266651	5133923	4666077	15662500	168489	-2524166	1286106	4	3	3	6	7	5	3	4	5
CDIF630erm_02881	CDIF630erm_02881	ACT domain-containing protein	Cytoplasmic	Signal transduction	Other		x		x	27.6268	27.4369	27.4101	26.57	26.6722	26.7843	NaN	NaN	NaN	-312800	-2526359	-4342504	-4730190	-2930463	-1713087	-5713621	-5848637	-5912021	7	6	6	3	4	3	0	0	0
CDIF630erm_02884	GpsA	glycerol-3-phosphate dehydrogenase [NAD(P)+]	Cytoplasmic	Energy metabolism	Anaerobic	x		x		28.2957	27.8857	27.8862	28.5505	28.7919	28.246	28.955	29.1979	28.8775	7300200	5265923	551454	15211960	20802640	10539000	21912360	7671307	13528310	10	9	7	9	8	7	6	3	6
CDIF630erm_02885	PlsY	glycerol-3-phosphate acyltransferase	CytoplasmicMembrane	Fatty acid and phospholipid metabolism	Biosynthesis					30.6003	29.5652	30.5696	30.3488	30.7561	30.8257	30.3233	31.1334	30.0899	54064200	56795840	79723980	53422860	45922610	56930460	42448630	37500340	17727390	5	5	3	5	5	4	3	3	3
CDIF630erm_02886	Der	GTPase Der	Cytoplasmic	Protein synthesis	Other	x	x			30.5847	30.6584	30.1075	31.2481	31.4536	31.1817	30.9514	31.7061	31.9743	26274200	45556350	26121110	82408220	67947580	78464310	64476930	132703900	119390000	27	28	24	23	25	18	11	14	18
CDIF630erm_02887	CDIF630erm_02887	putative fes-containing cyanobacterial-specific oxidoreductase	Cytoplasmic	Energy metabolism	Other	x		x		28.4266	28.4541	28.6996	28.6699	28.4626	28.4534	NaN	26.023	28.1957	7156200	20568620	15852110	13787190	2934889	9880213	-5713621	287525	6058346	14	13	13	9	7	8	0	4	4
CDIF630erm_02891	CDIF630erm_02891	two-component sensor histidine kinase	CytoplasmicMembrane	Regulatory functions	Small molecule interactions	x	x	x		28.2136	27.7992	28.5501	29.5346	29.2917	29.2274	28.9564	28.1968	28.0987	-942000	-2004905	731381	12012300	12410590	15395080	2907967	-118590	1345856	11	9	10	13	12	10	5	4	7
CDIF630erm_02892	CDIF630erm_02892	two-component response regulator	Cytoplasmic	Signal transduction	Two-component systems				x	25.1272	24.3641	23.4243	NaN	NaN	NaN	NaN	NaN	NaN	-2677200	-4027431	-5738851	-6677498	-6577091	-6456996	1800027	-3629635	6135759	4	4	3	0	0	0	1	1	2
CDIF630erm_02893	CDIF630erm_02893	laccase domain protein	Unknown	Unknown function	Unknown function					24.2911	24.4727	NaN	NaN	NaN	NaN	NaN	NaN	NaN	-5090100	-5666432	-6437990	-6645526	-6577091	-6112817	-3964954	-5848637	-3415510	4	2	2	1	0	1	1	0	1
CDIF630erm_02894	NrdR	transcriptional regulator, repressor NrdR family	Cytoplasmic	Regulatory functions	DNA interactions	x	x			27.581	26.4348	26.8968	28.8791	28.097	28.3247	NaN	28.7125	28.4233	4049200	-4939146	-2693517	29212270	13120220	9696158	-3471285	14900460	981790	7	5	4	9	7	4	1	3	2
CDIF630erm_02900	FtsZ	cell division protein FtsZ	Cytoplasmic	Cellular processes	Cell division	x	x			30.6228	30.4199	31.3339	29.8611	29.9475	29.6503	29.6858	29.7342	29.8033	57307200	50123960	86721690	27765140	28233000	27356510	28970650	46694920	24944080	16	19	19	17	16	14	12	12	10
CDIF630erm_02902	CDIF630erm_02902	hypothetical protein	Cytoplasmic	Unknown function	Unknown function				x	24.8216	25.713	26.2753	NaN	NaN	NaN	NaN	NaN	NaN	-3890200	-3731553	-3213084	-6527786	-6577091	-6456996	-5713621	-5848637	-5912021	2	4	4	1	0	0	0	0	0
CDIF630erm_02903	CDIF630erm_02903	hypothetical protein	Unknown	Unknown function	Unknown function					27.5162	27.5147	28.4364	27.8042	28.0243	27.9906	28.5888	NaN	26.5921	3645200	-684755	9417994	6657640	4237346	4223409	13938290	-2467783	-3746746	7	7	12	8	10	10	5	1	2
CDIF630erm_02905	MurG	UDP-N-acetylglucosamine-N-acetylmuramyl- (pentapeptide) pyrophosphoryl-undecaprenol N-acetylglucosamine transferase	CytoplasmicMembrane	Cell envelope	Biosynthesis and degradation of murein sacculus and peptidoglycan	x	x			28.1893	27.3753	28.0813	29.7116	29.9525	29.3807	28.9512	30.2823	30.0961	2492100	386427	287398	25965990	31372350	25796750	8719628	26980100	22788540	14	13	12	18	18	14	10	8	11
CDIF630erm_02906	SpoVE	cell division/stage V sporulation protein	CytoplasmicMembrane	Cellular processes	Sporulation and germination				x	22.8781	23.1268	23.0937	NaN	NaN	NaN	NaN	NaN	NaN	-6668566	-6313978	-5649897	-6287891	-6577091	-5614888	-5713621	-5848637	-5912021	2	2	3	1	0	1	0	0	0
CDIF630erm_02907	MurD	UDP-N-acetylmuramoylalanine-D-glutamate ligase	Cytoplasmic	Cell envelope	Biosynthesis and degradation of murein sacculus and peptidoglycan	x		x		29.5523	29.2604	28.9831	29.0273	29.0187	29.2464	29.6985	29.9351	30.2743	12805200	23878970	13382240	22095090	13800280	20876170	9471420	24709650	24167690	15	15	15	15	13	10	5	8	8
CDIF630erm_02908	MraY	phospho-N-acetylmuramoyl-pentapeptide- transferase (UDP-MurNAc-pentapeptide phosphotransferase)	CytoplasmicMembrane	Cell envelope	Biosynthesis and degradation of murein sacculus and peptidoglycan		x			30.7866	30.8894	30.9971	29.4855	29.182	29.7013	NaN	NaN	NaN	28352200	62030460	127015700	47286130	42650210	62579360	-5713621	2841086	-4455483	2	3	3	2	1	1	0	1	1
CDIF630erm_02909	MurF	UDP-N-acetylmuramoyl-tripeptide-D-alanyl-D- alanine ligase (UDP-MurNAc-pentapeptide synthetase) (D-alanyl-D-alanine-adding enzyme)	Cytoplasmic	Cell envelope	Biosynthesis and degradation of murein sacculus and peptidoglycan		x			28.7592	28.6903	28.3877	29.2958	29.3229	29.1939	28.6392	29.3492	29.9355	429500	7803578	3804253	25295700	17492540	22177060	4102173	10484770	25158280	10	13	13	14	10	10	8	7	8
CDIF630erm_02912	RsmH	ribosomal RNA small subunit methyltransferase H	Cytoplasmic	Cell envelope	Biosynthesis and degradation of murein sacculus and peptidoglycan					NaN	24.4648	23.3173	NaN	NaN	NaN	NaN	NaN	NaN	-6609590	-5796058	-6203032	-6677498	-6577091	-6456996	-2930175	-3839416	-5140502	1	3	2	0	0	0	2	1	1
CDIF630erm_02913	Lgt	prolipoprotein diacylglyceryl transferase	CytoplasmicMembrane	Protein fate	Protein modification and repair	x	x	x		25.2153	25.673	25.6543	26.8965	27.9767	26.8442	26.436	26.6806	NaN	-4317900	-2851484	-2714597	1177396	3135210	3140354	-4563825	-2576354	-4270243	3	3	3	3	3	3	1	1	1
CDIF630erm_02916	YchF	ribosome-binding ATPase YchF	Cytoplasmic	Unknown function	Unknown function		x			30.7927	30.7179	30.3639	31.4392	31.8879	31.2724	30.9537	31.9955	32.1506	48220200	66508930	48543000	127292000	150487300	137950000	61499790	170520200	162906600	12	13	14	13	13	12	10	12	13
CDIF630erm_02917	CDIF630erm_02917	putative signaling protein	CytoplasmicMembrane	Signal transduction	Other					29.2788	29.5487	29.6757	29.3335	29.0409	29.6188	28.4492	29.4488	29.0692	-3436500	3079940	3959866	3282438	-540911	-697902	-3158951	1902176	-3087515	21	25	26	21	16	13	9	13	7
CDIF630erm_02918	MurE	UDP-N-acetylmuramoyl-L-alanyl-D-glutamate-2, 6-diaminopimelate ligase	Cytoplasmic	Cell envelope	Biosynthesis and degradation of murein sacculus and peptidoglycan					29.4646	28.8165	28.889	29.5306	29.14	29.4076	27.8504	28.3026	29.1815	4201200	7602976	4809416	20487640	11372770	14191370	-4012647	1742639	10845920	18	16	15	21	17	12	6	7	13
CDIF630erm_02921	PtsG-BC	PTS system, glucose-specific IIBC component	CytoplasmicMembrane	Transport and binding proteins	Carbohydrates, organic alcohols, and acids	x		x		36.2832	36.4416	36.9711	37.0481	36.5376	36.8258	34.4368	34.9362	34.534	1810454000	3222239000	4547798000	4756424000	3210573000	4466055000	1255711000	1759295000	1271549000	25	25	27	22	21	19	19	19	20
CDIF630erm_02922	CDIF630erm_02922	transcription antiterminator, licT family	Cytoplasmic	Regulatory functions	RNA interactions					30.2657	29.8638	29.4229	29.5985	29.8731	29.9279	30.0742	29.3399	30.1142	39735200	22205630	31662390	14087840	37854330	22431540	58519180	27432880	65651970	15	13	13	11	12	8	9	5	9
CDIF630erm_02923	NhaK	sodium, potassium, lithium and rubidium/h(+) antiporter	CytoplasmicMembrane	Transport and binding proteins	Cations and iron carrying compounds	x		x		31.6013	31.8965	32.1293	32.1875	31.9021	32.1365	31.7973	31.1268	31.2295	19345200	51600000	109562800	67932190	38905460	55903780	29930310	43649670	38008060	18	17	17	17	16	14	7	11	8
CDIF630erm_02924	AppF	ABC-type transport system, ATP-binding protein, putative oligopeptide transport system	CytoplasmicMembrane	Transport and binding proteins	Amino acids, peptides and amines	x	x			31.9352	31.6317	31.8872	32.3185	32.446	32.1317	32.3409	33.1804	33.1462	382784200	260943300	268803600	268275100	245273900	252409000	632728600	477954400	290878300	17	16	17	17	15	12	8	7	6
CDIF630erm_02925	AppD	ABC-type transport system, ATP-binding protein, putative oligopeptide transport system	CytoplasmicMembrane	Transport and binding proteins	Amino acids, peptides and amines					31.3795	31.2661	31.9608	31.8302	32.3731	31.5836	31.66	31.5083	31.2681	131994200	96127830	134995800	173850300	277073900	222815300	397328900	152526600	101494900	12	12	11	11	9	8	9	6	7
CDIF630erm_02926	AppA	ABC-type transport system, oligopeptide-family solute-binding protein	Cellwall	Transport and binding proteins	Amino acids, peptides and amines					36.2107	36.7629	37.577	37.0099	36.4524	37.2102	36.7173	36.3789	36.6228	1446454000	2926207000	4242115000	3021298000	2504718000	4700567000	2427282000	2254414000	2159091000	49	57	55	50	49	48	44	46	46
CDIF630erm_02927	AppB	ABC-type transport system, oligopeptide-family permease protein	CytoplasmicMembrane	Transport and binding proteins	Amino acids, peptides and amines					29.618	30.4011	29.9624	30.0445	30.2125	29.5641	29.8265	28.543	28.5464	47541200	61850500	50439540	58950680	77965110	53563050	21929680	-1343162	19536450	5	5	6	4	5	4	2	2	3
CDIF630erm_02928	AppC	ABC-type transport system, oligopeptide-family permease protein	CytoplasmicMembrane	Transport and binding proteins	Amino acids, peptides and amines					30.3447	30.1971	30.8498	30.8507	30.5655	29.4721	NaN	29.8216	30.2714	38905200	43521440	58852370	55653970	40479200	53799980	29024930	31898590	55410920	5	5	5	5	4	4	1	2	3
CDIF630erm_02929	CDIF630erm_02929	transcriptional regulator, LysR family	Cytoplasmic	Regulatory functions	DNA interactions					26.9358	26.4837	26.4853	26.9555	27.154	26.9192	28.019	NaN	26.7036	4406200	-2620557	-3622616	-1355773	4286872	725473	14703940	-3440964	877621	10	8	7	9	7	5	6	2	6
CDIF630erm_02936	Pfo	pyruvate synthase	Cytoplasmic	Energy metabolism	Electron transport					36.1375	35.7653	35.2237	36.399	36.4471	35.2605	34.4635	34.8019	35.4285	330504200	381147600	258839500	816546900	825938900	467659800	254950400	528348900	304015900	66	65	58	63	61	56	34	44	46
CDIF630erm_02937	CDIF630erm_02937	phosphate acyltransferase	Cytoplasmic	Energy metabolism	Other		x			30.8342	30.8771	30.813	29.0564	30.7159	28.6011	29.297	29.2371	29.6095	154904200	91265500	42987620	14296210	24646440	10283210	2844914	15000170	57126780	14	12	12	10	10	5	5	4	7
CDIF630erm_02938	Isf	iron-sulfur flavoprotein	Cytoplasmic	Energy metabolism	Electron transport					25.1196	25.6228	25.6368	24.7077	25.6149	NaN	NaN	25.3046	NaN	-1251700	-2405498	-4993375	-5025736	-4982857	-5496784	-4982984	-4184910	-3063932	4	4	3	6	3	2	1	2	1
CDIF630erm_02939	CDIF630erm_02939	putative sporulation stage II, protein E	Cytoplasmic	Cellular processes	Sporulation and germination	x		x		27.4593	27.6495	27.7837	27.9013	28.2333	27.7197	27.506	27.4655	27.5983	-5372100	-2283623	-2170268	661720	1233120	-563860	-3827034	-3300240	-1847810	5	12	9	13	10	5	5	3	5
CDIF630erm_02944	CDIF630erm_02944	putative lipoprotein	Unknown	Unknown function	Enzymes of unknown specificity	x	x			25.0184	24.9236	NaN	26.3172	26.7371	26.5738	25.9916	27.3734	27.7943	-5736400	-6138463	-6561935	-2873415	-1137968	1891232	-2643387	6811838	3520256	5	4	1	5	7	7	4	5	4
CDIF630erm_02946	Hpt1	hypoxanthine phosphoribosyltransferase	Cytoplasmic	Purines, pyrimidines, nucleosides, and nucleotides	Salvage of nucleosides and nucleotides					27.6883	27.3894	28.3388	27.8179	27.9457	27.5386	NaN	NaN	27.9866	1744500	175258	-546107	6176692	4287611	616663	1050083	2170739	13984520	7	6	6	7	7	4	1	1	3
CDIF630erm_02947	CobD1	threonine-phosphate decarboxylase	Cytoplasmic	Biosynthesis of cofactors, prosthetic	Heme, porphyrin, and cobalamin					26.5046	25.6594	25.4408	25.9053	26.2378	25.9948	26.0896	26.9132	NaN	-1498300	-3826950	-4085102	-4497998	-941221	-5014498	-4517440	997755	-4527311	9	7	8	6	7	3	2	3	2
CDIF630erm_02948	SstT	putative serine/threonine transporter SstT	CytoplasmicMembrane	Transport and binding proteins	Carbohydrates, organic alcohols, and acids				x	28.8402	28.9966	28.698	27.0002	NaN	NaN	NaN	NaN	NaN	21123200	47395620	36064300	3169693	-5122511	-6098853	-5713621	-5848637	-5912021	2	2	2	1	1	1	0	0	0
CDIF630erm_02950	AsnA	aspartate-ammonia ligase	Cytoplasmic	Amino acid biosynthesis	Aspartate family	x	x			28.7047	28.4267	28.1238	28.7532	29.2351	28.9154	29.1468	29.3802	29.0766	8869200	3819608	1768640	25415110	27398450	20858620	10144680	82714800	11047340	13	11	12	12	12	8	4	7	7
CDIF630erm_02956	CDIF630erm_02956	transcriptional regulator, sigma-54 dependent	Cytoplasmic	Transcription	Transcription factors		x			25.5337	NaN	25.1252	24.6599	24.175	NaN	NaN	NaN	NaN	-6308750	-6445689	-6337505	-6218683	-6214899	-6119151	-5594601	-5759054	-3677169	2	2	2	3	2	2	1	1	1
CDIF630erm_02957	CDIF630erm_02957	putative lipoprotein	Unknown	Transport and binding proteins	Unknown substrate	x		x		32.9174	32.7386	34.0222	33.0814	33.2442	33.445	31.8753	32.1238	31.9938	292374200	312571500	450506100	326117300	346291900	567958100	128762600	204912000	245768400	25	25	25	22	21	20	9	12	15
CDIF630erm_02961	AdeP	adenine permease AdeP	CytoplasmicMembrane	Transport and binding proteins	Unknown substrate	x		x		28.4546	28.7527	28.5407	28.8824	28.3919	30.101	27.5535	NaN	26.0261	1324000	14531580	31110940	27534420	17243430	24684520	4824401	-3155323	-522057	6	5	5	6	5	6	3	1	4
CDIF630erm_02962	CDIF630erm_02962	putative adenosine-derivate deaminase	Cytoplasmic	Purines, pyrimidines, nucleosides, and nucleotides	Pyrimidine ribonucleotide biosynthesis	x	x			28.6157	28.4567	28.5733	30.0729	30.19	29.4881	29.3219	28.6234	29.6162	5653200	6424956	5939070	29341190	30721120	19796840	6634013	346861	11242000	18	15	12	19	18	17	9	6	11
CDIF630erm_02970	Cwp22	putative cell wall protein	Cellwall	Unknown function	Unknown function	x	x	x		26.2764	25.9744	25.5081	27.6115	27.8214	27.7943	24.7693	NaN	25.0005	-5511600	-5586535	-5809265	970460	-620348	3378815	-4996499	-5040922	-5644854	9	6	7	13	10	10	2	2	2
CDIF630erm_02971	GalE	UDP-glucose 4-epimerase	Unknown	Energy metabolism	Sugars	x	x	x		29.4251	28.7241	28.4009	29.7921	30.1925	30.0291	30.3506	31.0367	30.9078	22752200	10303260	6737559	31038540	65239180	53380970	117237500	85611300	61968470	11	11	10	11	12	8	10	9	10
CDIF630erm_02972	GtaB1	UTP-glucose-1-phosphate uridylyltransferase	Cytoplasmic	Cell envelope	Biosynthesis and degradation of surface polysaccharides and lipopolysaccharides	x	x	x		31.04	30.6662	30.2914	29.8368	30.0715	29.6243	30.7241	30.9501	30.9835	125264200	72030020	41150410	21629360	44578760	36245580	92799030	108824200	42004220	22	23	17	12	12	9	9	7	8
CDIF630erm_02974	CDIF630erm_02974	hypothetical protein	Cytoplasmic	Unknown function	Unknown function					30.8667	31.4146	31.9821	30.9521	30.6227	31.1197	30.9742	30.4553	30.4766	16944200	66951410	59547760	35842800	21682280	37763660	14574600	27238360	14147610	45	46	48	38	35	34	18	20	19
CDIF630erm_02975	CDIF630erm_02975	putative sporulation protein	Cytoplasmic	Cellular processes	Sporulation and germination	x	x	x		33.3247	33.8759	34.429	32.7348	32.7635	32.4578	31.7919	31.8954	31.1184	61281200	110937700	188385600	101094300	102558000	98642430	45726020	45488590	15594410	56	63	66	42	40	31	17	16	16
CDIF630erm_02977	CDIF630erm_02977	putative peptidase C60B, sortase B	Unknown	Protein fate	Protein and peptide secretion and trafficking			x		26.5229	27.0409	27.6368	26.1422	26.1742	26.7209	25.9345	NaN	25.6878	214600	2545002	2914341	-4452447	314304	2892460	1352763	-5848637	386989	4	4	5	4	3	5	2	0	4
CDIF630erm_02981	CDIF630erm_02981	putative peptidoglycan-N-acetylmuramic acid deacetylase	Cytoplasmic	Cellular processes	Sporulation and germination	x		x		28.4544	29.1879	29.3369	28.7683	29.0337	29.0268	27.7387	27.9055	27.8481	12074200	17918700	19439470	10252150	25727880	19768320	9631941	6487208	808100	16	17	16	13	11	10	5	5	5
CDIF630erm_02983	CDIF630erm_02983	two-component sensor histidine kinase	Cytoplasmic	Signal transduction	Two-component systems	x	x			25.8771	26.1549	26.0174	27.3316	27.154	27.0244	NaN	27.2435	29.0321	-5952460	-4875855	-3119621	1360071	-1477966	-2474917	-5713621	-3042791	1395912	4	4	6	6	3	4	0	2	2
CDIF630erm_02984	CDIF630erm_02984	two-component response regulator	Cytoplasmic	Signal transduction	Two-component systems			x		NaN	25.5353	25.2289	NaN	25.5334	25.2839	26.4068	NaN	26.7374	-2503100	-1614737	-2485449	-4298053	33189.7	489864	22269200	-701752	18236220	2	2	2	2	2	2	2	1	2
CDIF630erm_02985	CDIF630erm_02985	putative membrane protein	CytoplasmicMembrane	Unknown function	Unknown function					25.7459	24.9143	25.2882	25.2872	NaN	NaN	NaN	NaN	NaN	-5662700	-5540682	-4341742	-4848092	-5960161	-5868478	-5713621	-5029949	-5912021	3	3	3	2	2	1	0	1	0
CDIF630erm_02986	CDIF630erm_02986	putative polysaccharide deacetylase	Cytoplasmic	Energy metabolism	Sugars					29.8638	30.0535	31.1241	31.5794	30.9783	29.5112	NaN	NaN	29.4228	17570200	14027190	146691100	116616900	11253760	96025290	-5713621	-5635620	8930137	7	8	8	7	7	4	0	1	4
CDIF630erm_02987	UgtP3	processive diacylglycerol beta-glucosyltransferase	Unknown	Fatty acid and phospholipid metabolis	Biosynthesis					26.4888	26.5158	NaN	NaN	NaN	NaN	NaN	NaN	NaN	-6151730	-3806745	-2103219	-6677498	479144	-6456996	-5713621	-5144391	-5912021	3	2	1	0	1	0	0	1	0
CDIF630erm_02988	GlyA1	serine hydroxymethyltransferase	Cytoplasmic	Protein fate	Protein modification and repair	x	x	x		31.8464	31.7603	31.2488	31.0488	31.1019	30.8882	31.5979	32.4105	32.3618	112914200	160221400	81406540	89653370	53167440	63913160	118415400	222434900	179125700	28	29	23	26	20	18	15	19	19
CDIF630erm_02989	CDIF630erm_02989	putative membrane protein	CytoplasmicMembrane	Hypothetical proteins	Domain					28.2735	28.3479	28.8829	28.1539	28.0279	28.6437	NaN	NaN	NaN	-1373400	5309675	13572380	5459313	2052441	5013378	-1693423	2000578	631704	5	6	6	5	3	4	1	1	1
CDIF630erm_02991	CDIF630erm_02991	putative regulator of the sigma(E) factor	Cytoplasmic	Transcription	DNA-dependent RNA polymerase					31.4533	31.7211	31.3236	31.6942	31.46	31.9271	31.1586	31.9808	31.0404	158624200	151891800	162339900	277789400	192650800	211370500	77708930	220767600	36961860	4	6	4	4	6	5	3	3	3
CDIF630erm_02993	CDIF630erm_02993	putative membrane protein	CytoplasmicMembrane	Cell envelope	Other					28.9708	28.9332	29.5519	28.3118	28.1011	29.0407	NaN	28.7196	27.7052	13415200	14402800	35329020	20020020	6313737	23322200	2316696	4514091	-3937117	3	4	3	3	4	3	1	2	2
CDIF630erm_02998	Cwp14	putative cell wall-binding protein	Cellwall	Cell envelope	Other	x		x		30.4418	30.131	30.2413	29.7241	30.0497	30.617	24.0169	24.3517	23.2114	23526200	31359850	21878220	18411620	23049790	63380080	-4138864	-4592984	-4745314	17	19	20	16	19	16	3	5	3
CDIF630erm_02999	CDIF630erm_02999	transcriptional regulator, LysR family	Cytoplasmic	Regulatory functions	DNA interactions	x		x		25.5203	24.9178	NaN	25.2431	25.0007	25.2434	26.8909	26.0066	26.0258	-3885800	-5810266	-4493301	-5808283	-5443194	-2769515	692318	-998343	-2974732	6	4	3	3	4	4	2	3	4
CDIF630erm_03000	CDIF630erm_03000	putative beta-ureidopropionase	Cytoplasmic	Central intermediary metabolism	Nitrogen metabolism					23.9858	24.1248	24.1787	24.4661	24.3495	23.9483	24.4868	NaN	24.4531	-5538900	-5795320	-6400960	-6373691	-5108498	-4839683	-1355292	-5848637	-2970592	4	4	2	2	3	3	2	0	3
CDIF630erm_03001	CDIF630erm_03001	putative cytosine permease	CytoplasmicMembrane	Transport and binding proteins	Nucleosides, purines and pyrimidines	x				28.2052	27.9753	28.2856	27.794	28.2914	28.747	NaN	26.8483	NaN	-510100	2207776	12792850	2595505	719234	2963099	-2113350	-2023480	-5912021	3	2	2	2	2	3	1	3	0
CDIF630erm_03002	AspS	aspartate-tRNA ligase	Cytoplasmic	Protein synthesis	tRNA aminoacylation	x	x	x		32.0756	31.7305	31.8922	31.4964	31.5822	31.4804	32.4739	32.0541	31.7451	36419200	71902060	39741140	70729400	67657080	78935970	121429500	174345200	78654320	25	27	27	26	24	25	17	23	20
CDIF630erm_03003	HisS	histidine-tRNA ligase	Cytoplasmic	Protein synthesis	tRNA aminoacylation					25.7584	26.3853	27.2446	27.4445	27.5618	26.3728	NaN	26.6431	NaN	-5289400	-2546103	854899	1195949	643689	-4305666	-5713621	-3599068	-4812732	5	5	6	6	7	4	0	2	1
CDIF630erm_03004	HemZ	coproporphyrinogen III oxidase	Cytoplasmic	Biosynthesis of cofactors, prosthetic groups, and carriers	Heme, porphyrin, and cobalamin	x	x	x		30.1235	30.0898	30.2765	29.3179	29.054	28.7499	27.1109	27.0503	27.8137	11955200	25923790	27197760	12185930	6534016	8494860	-1462256	-1464081	-218994	27	28	31	22	19	15	5	6	9
CDIF630erm_03005	CDIF630erm_03005	putative hydrolase beta-lactamase-like	Cytoplasmic	Cell envelope	Biosynthesis and degradation of murein sacculus and peptidoglycan		x			28.1471	28.2116	28.619	26.6132	27.3844	NaN	26.3528	27.3213	27.708	15225200	12295240	8158501	-906911	970190	-5220598	4040967	426956	12970640	8	7	9	3	5	1	2	2	4
CDIF630erm_03007	RelA	GTP pyrophosphokinase	Cytoplasmic	Cellular processes	Adaptations to atypical conditions	x	x			26.3089	26.4289	26.1237	27.4805	27.0615	27.509	27.4388	27.8409	27.0147	-5942010	-5576571	-5861457	-2117857	-2834551	-5003126	-4294150	16031590	-4250531	11	9	9	10	10	5	5	7	6
CDIF630erm_03008	Apt	adenine phosphoribosyltransferase	Cytoplasmic	Purines, pyrimidines, nucleosides, and nucleotides	Salvage of nucleosides and nucleotides					25.9021	27.1283	26.7538	25.9132	26.6573	25.5285	NaN	25.1377	27.034	6754200	7663239	-1913310	-3816754	-1651326	-4440886	-5111239	-4904626	13377240	7	7	4	5	5	2	1	2	4
CDIF630erm_03009	RecJ	single-stranded-DNA-specific exonuclease	Cytoplasmic	DNA metabolism	DNA replication, recombination, and repair	x		x		28.6036	28.5734	28.2726	28.7934	28.5295	28.506	NaN	29.5115	29.4971	-4639600	-2183613	-3288704	-1157729	-2827734	4183263	-4675482	5222033	4912936	15	17	13	13	9	6	1	6	2
CDIF630erm_03010	UbiB	putative protein kinase UbiB	CytoplasmicMembrane	Biosynthesis of cofactors, prosthetic	Menaquinone and ubiquinone	x	x	x		29.222	29.2399	29.4019	30.6414	30.1055	30.8579	30.0189	28.8468	29.5905	551600	5900749	7119297	36225740	18969450	65415880	4252300	7700893	6506288	21	20	25	27	22	26	10	9	11
CDIF630erm_03011	CDIF630erm_03011	uncharacterized protein, LpxA-like	Unknown	Amino acid biosynthesis	Pyruvate family					25.1236	25.3907	25.824	25.8296	25.2502	25.2706	NaN	NaN	NaN	-2655300	-3112580	-3773095	-2857640	-3172372	-4625540	-4360216	-3256206	-4497428	3	3	3	3	3	2	1	1	1
CDIF630erm_03012	CDIF630erm_03012	radical SAM maturase	Cytoplasmic	Regulatory functions	Other	x	x			32.4571	32.3941	32.1937	31.04	30.9728	30.8994	30.8873	31.0819	31.3007	128814200	218717900	161119300	61990500	60717540	57573230	36114410	84339580	62323970	24	25	26	19	19	16	13	13	13
CDIF630erm_03014	CDIF630erm_03014	hypothetical protein	Cytoplasmic	Unknown function	Unknown function					25.0098	25.2774	24.3713	24.6203	24.8939	25.7378	24.787	24.9679	NaN	-6528940	-5449067	-5405003	-5415045	-5547533	-4830050	-5273711	-5111657	-5596978	2	4	6	5	6	4	3	2	1
CDIF630erm_03016	CDIF630erm_03016	putative signaling protein	CytoplasmicMembrane	Regulatory functions	Small molecule interactions					26.7471	27.0427	27.6843	26.9879	26.1905	27.1446	NaN	26.272	NaN	-6243040	-5625653	-4968486	-5635770	-6331631	-5612649	-5587781	-4863830	-5785647	8	12	14	9	4	8	2	3	1
CDIF630erm_03017	CDIF630erm_03017	putative diguanylate kinase signaling protein	CytoplasmicMembrane	Signal transduction	Other					25.9242	25.7267	26.2736	26.6963	25.4697	26.6345	NaN	NaN	NaN	-5834600	-6396514	-4693115	-4990448	-6119726	-3726958	-5620003	-5371715	-5061744	6	3	5	6	3	7	2	2	2
CDIF630erm_03018	PtsI	phosphoenolpyruvate-protein phosphotransferase	Cytoplasmic	Signal transduction	PTS	x		x		29.9833	30.5665	31.2524	30.8837	30.9092	30.4697	28.4064	28.9505	29.0474	9881200	45355750	54743210	48532510	41911760	41363600	-218080	5120035	8972226	26	28	31	29	27	20	4	9	10
CDIF630erm_03019	PtsH	phosphocarrier protein HPr	Cytoplasmic	Signal transduction	PTS	x	x	x		28.7313	27.9522	28.8659	26.9802	26.4039	NaN	28.1373	28.6532	28.5955	38554200	21001200	22997180	-1347727	-4414299	-1233187	2470404	6636283	1873617	5	5	5	3	3	1	2	3	2
CDIF630erm_03022	CDIF630erm_03022	transcriptional regulator, Rrf2 family	Cytoplasmic	Regulatory functions	DNA interactions		x			24.2582	24.6814	24.6247	25.3276	NaN	26.2456	NaN	NaN	NaN	-5903410	-6149312	-5852949	-4767252	-6001318	-3423816	-5471644	-5848637	-5912021	3	3	3	5	1	3	1	0	0
CDIF630erm_03023	CDIF630erm_03023	putative signaling protein	CytoplasmicMembrane	Signal transduction	Other					24.9168	24.5894	25.1469	24.8161	25.6659	25.4133	NaN	NaN	NaN	-6283760	-5715145	-5478020	-5852124	-6041454	-5306768	-5312998	-5655373	-5243824	3	6	7	4	2	3	1	1	1
CDIF630erm_03024	CDIF630erm_03024	putative N-acetylmuramoyl-L-alanine amidase	Cellwall	Cell envelope	Biosynthesis and degradation of murein sacculus and peptidoglycan					25.5041	26.1307	26.7446	26.5098	26.54	26.8379	26.9744	NaN	26.3834	-3968400	-1245327	-3254672	-1159122	180880	1222577	4429797	-5848637	-2079225	5	6	6	6	5	5	4	0	3
CDIF630erm_03026	CDIF630erm_03026	putative lipoprotein	Cytoplasmic	Unknown function	Unknown function	x	x	x		28.7222	28.946	29.7536	31.1062	30.5807	30.6692	29.2948	27.506	NaN	21908200	16357640	21849530	61143730	33405870	57816730	4658337	2178422	-3416500	8	9	8	8	7	6	2	2	1
CDIF630erm_03027	YbiV	putative sugar phosphatase	Cytoplasmic	Unknown function	Enzymes of unknown specificity					30.7654	30.4743	29.5875	30.6703	30.7234	30.7561	30.6806	30.7222	31.1561	84004200	47620980	24853350	35770010	86236670	62664920	158534000	22846210	186498700	18	18	16	17	19	17	13	13	17
CDIF630erm_03028	CDIF630erm_03028	transcriptional regulator, LytR family	CytoplasmicMembrane	Regulatory functions	Other					26.7878	26.9337	28.0246	27.7629	28.025	28.3404	27.6315	NaN	NaN	-576800	-2367026	4316804	4702449	2031300	193269	2130423	-3310026	-4328569	7	6	9	4	5	4	2	1	1
CDIF630erm_03029	CDIF630erm_03029	transcriptional regulator, LytR family	CytoplasmicMembrane	Regulatory functions	Other					30.0821	30.4394	31.3696	30.2953	30.4333	30.2118	30.763	29.9429	28.4762	53928200	58805980	104126000	35989320	55770870	43423540	84065090	26877120	8791095	16	17	17	13	12	11	6	7	5
CDIF630erm_03030	Cwp19	cell surface protein	Cellwall	Cell envelope	Other	x		x		32.2731	32.6322	33.2402	31.4299	31.3077	32.3979	30.5875	27.794	25.2584	58273200	160782700	139897600	61790700	41360320	137796500	9053373	1979001	-5044327	49	47	49	38	34	34	17	12	5
CDIF630erm_03032	CapD	putative capsular polysaccharide biosynthesis protein	CytoplasmicMembrane	Cell envelope	Biosynthesis and degradation of surface polysaccharides and lipopolysaccharides			x		29.4109	29.9091	30.469	30.4066	30.3808	30.0906	29.7905	29.5507	29.9415	-1728100	4891961	15118780	13343820	9989000	11614590	4641938	50796110	6631802	22	27	32	28	23	23	6	9	10
[truncated: 432 more rows]
